# Supplementary material
Source: PubMed Central journal article supplement (PMC3677247)
Supplement: supp_035394.112_File_1-4.pdf [file supp_035394.112_File_1-4.pdf]

# Supplemental File1

Sequenced rat DNA fragment (in FASTA format) obtained by PCR employing Primers #1 and #2. The hairpin mir-155 is reported in bold outlined.

>Rat\_DNA\_Contig1

```
TGGGTTCATCCATTGAGTTTAACTTTCAAAAATCATAAAGTACCATCCTAAATATCTGAGATTTCTTGAATTGCCTAGTGACCTGTGGGATGTACGTCAGAATATTACCCAGAACTGAAGTTGTGTCCTTTGAACTTCAGCATTGTAGAACTATGAACCGTGGCTGTGTTAAAAATGATACATGTATTCAAATATTTCCACAGAATTTAAAGTTTGATTTTATAATTAGTTTTTAAATTGCAAACCTTACAAAAATTTTCCAA AATTTACTTAGAAGCATTTCAGAGCTCTTTTCTTTCAAAGCTGAAGTCTACCTTGCCTTCAGATTCATAATCGTTCACTCTACTTTATAACTAACTGTGTGCGTACACACAACTATTTCTTTTTCTCTTTGCAGGTGCTGCAAACCAGGAAGGGGAAGTGTGTGGTTTTAAGTTGCATATCCCTTATCCTCTGGCTGCTGGAGGCTTGCTGAAGGCTGTATGCTGTTAATGCTAATTGTGATAGGGGTTTTGGCCTCTGACTGAC TCCTACCTGTTAGCATTAAACAGGATACAGTGCCTGTTACTAGCATTACGTGGAACAAATGGCCGC CGCCGTGGGAGGATGACAAGACCATGAGTCACTCTGCTGGATGAACGTAGAAGTCAGGCTCTATCACTTCTTAATGTGCTCATCGTAACC CGGTTACTAGGATTTTCCACTGTGAGTGTCAATAAAATGTCATTTAAAAGA CTTATCAGCAGTATCCCGAACAAACATC GCAACTTCAGGCCACGTTTATTTTTATC TTGAATGGAAAATGAACTTGTATCATTTTTATTCCAAAATTATGTTCATAACCATTTTCAATGAT TCAACCAGAATGCAAAATGAATAAACTACAAAAGGACATTTCTGATATTTCTGTAGTTAAGATCAA GGACAGCCGTTCCCGACTGACATCTAGGATTTCTGGAGCACCTCTTGGAAGACTTGGAATTGGCAT TTTT
```

Sequenced rat DNA fragment (in FASTA format) obtained by PCR employing Primers #3 and #4. The hairpin mir-155 is reported in bold outlined.

>Rat\_DNA\_Contig2

```
AAAAAAAAAAAAATCATAAAATGCTATTCTAAATATCTGGGTTGTTTTCTTCAATTGCCAGTGACC TGTAGGATGCAAATCAGAAATGCAGCACAGAACTGAAGCTATGTCCTTTGAGCTTCAGCTCTGTAGA ACTGTGAACAGGCTGTGTTAAAGAAGATACGTCCACGCAAGTTATTTCCACCTCAAGAACAGAATT TAAAGTTTAAATTTTAAAATCAGTTTTTTTTAATTGCTAAGGTTACAAAAATTTTCCAAAATTACTT ATAAGCATTTTCGGGAGTCCTTTTCTTTCAAGGCTGAAGGCTACCTTGTCTTCGGAGTTACAGCAGT CACTCCACTTTCTAACTGTAATGTACACAACTATTTCTTTTTGTCTTTGCAGGTGGCACAACCA GAAAGGGGAAGTGTGTGGTTTTAAGTTGCTTATCCCTTATCCTGTCTGGCTGCTGGAGGCTTGCTG AAGGCTGTATGCTGTTAATGCTAATTGTGATAGGGGTTTTGGCCTCTGACTGACTCCTACCTGTTA GCATTAACAGGATACAGTGCCTGTTACTAGCATTACGTGGAACAAATGGCCGCCGCTGGGAGG ATGACAAGACCATGAGTCACTCTGCTGGATGAACGTAGAAGTCAGGCTCTATCACTTCTTAATGTG CTCATCGTAACC CGGTTACTAGGATTTTCCACTGTGAGTGTCAATAAAATGTCATTTAAAAGA CT TATCAGCAGTATCCCGAACAAACATC GCAACTTCAGGCCACGTTTATTTTTATCTTGAATGGAAAA TGAACTTGTATCATTTTTATTCCAAAATTATGTTCATAACCATTTTCAATGATTCAACCAGAATG CAAAATGAATAAACTACAAAAGGACATTTCTGATATTTCTGTAGTTAAGATCAAGGACA
```

# Supplemental File1

Sequenced rat cDNA fragment (in FASTA format) obtained by PCR employing Primers #6 and #9. The hairpin mir-155 is reported in bold outlined.

>Rat\_cDNA\_Contig1

GCTTGCTGAAGGCTGTATG**CTGTTAATGCTAATTGTGATAGGGGTTTTGGCCTCTGACTGA**  
**CTCCTACCTGTTAGCATTAAACAG**GATACAGTGCCTGTTACTAGCATTCCACGTGGAACAAAT  
GGCCGCCGCCGTGGGAGGATGACAAGACCATGAGTCACTCTGCTGGATGAACGTAGAAGTC  
AGGCTCTATCACTTCTTAATGTGCTCATCGTAACC**C**GGTACTAGGATTTTCCACTGTGAG  
TGTCACAATAAATGTCATTTAAAAGA**C**TTATCAGCAGTATCCCGAACAAACATC**G**CAACTTC  
AGGCCACGTTTATTTTTATCTTGAATGGAAAATGAACTTGTATCATTTTTATTCCAAAA  
TTATGTTCATAACCATTTTCAATGATTCAACCAGAATGCAAATGAATAAACTACAAAAGG  
ACATTTCTGATATTTCTGTAGTTAAGATCAAGGACAGCCGTTCCCGACTGACATCTAGGAT  
TTCTGGAGCACCTCTTGGGAAGACTGGGAATTGGCATTTTTCTCCACGTTACTTTATTAGT  
CAGCTTTGATATAAAATTCGTAACTCTTAATTTG**G**TTTTTAGTTTAAGGAAAAGCTGAGTC  
AACACTGAGTGATTTTTTTTTTTTAGTTTATTAGCCAGCTGGTGGTAGTTTACACCTTTAAT  
CCCAGCACTTGAGAGGCAGAGGCGGGCGGATCACTGAGTTGAAGGACAGCCTGGTCTACAG  
AGTGAATCCAGGACAGCCAGGGCTACACAGAGAATAGGTAAAGTGTTAAAAACTGACATG  
ACAGATGGTCCCTGAGAGTTAGCTACATTTTCTCACACAGTACAAATATTTAACTTAGAA  
ATAGTCACATTTGAAATGAAACCCCAAATGTAGGTTCAAGTTTAATACTTTAGCTGCACAG  
TAAAGCTGTGTACTCAGGAGACCCACCACCTTTCCTAAACCT

# Supplemental File2

## Human *Bic* gene (reference assembly) aligned against the alternate assembly.

```
Human-BIC_GRCh37.p5      GCCGAGCCCGGGCCAGCGCCGCTGCAGCCTCGGGAAGGGAGCGGATAGCGGAGCCCCG 60
Human-BIC_HuRef          GCCGAGCCCGGGCCAGCGCCGCTGCAGCCTCGGGAAGGGAGCGGATAGCGGAGCCCCG 60
*****

Human-BIC_GRCh37.p5      AGCCGCCCGCAGAGCAAGCGCGGGGAACCAAGGAGACGCTCCTGGCACTGCAGGTACGCC 120
Human-BIC_HuRef          AGCCGCCCGCAGAGCAAGCGCGGGGAACCAAGGAGACGCTCCTGGCACTGCAGGTACGCC 120
*****

Human-BIC_GRCh37.p5      GACTTCAGTCTCGCGCTCCCGCCCGCCTTTCTCTCTTGAACGTGGCAGGGACGCCGGGG 180
Human-BIC_HuRef          GACTTCAGTCTCGCGCTCCCGCCCGCCTTTCTCTCTTGAACGTGGCAGGGACGCCGGGG 180
*****

Human-BIC_GRCh37.p5      GACTTCGGTGCAGGGGTCACCGCCGGGTAACTGGCGAGGCAAGGCGGGGGCAGCGCGCA 240
Human-BIC_HuRef          GACTTCGGTGCAGGGGTCACCGCCGGGTAACTGGCGAGGCAAGGCGGGGGCAGCGCGCA 240
*****

Human-BIC_GRCh37.p5      CGTGGCCGTGGAGCCCGCCTGGTCCCGCGCGCGCCTGCGGGTGCCCCCTGGGGACTCAG 300
Human-BIC_HuRef          CGTGGCCGTGGAGCCCGCCTGGTCCCGCGCGCGCCTGCGGGTGCCCCCTGGGGACTCAG 300
*****

Human-BIC_GRCh37.p5      TGGTGTGCGCTCGCCCGGGACCAGAGATTGCGCTGGATGGATTCCCGCGGGCAGAGGCAG 360
Human-BIC_HuRef          TGGTGTGCGCTCGCCCGGGACCAGAGATTGCGCTGGATGGATTCCCGCGGGCAGAGGCAG 360
*****

Human-BIC_GRCh37.p5      GGGGAAGGAGGGGTGTTTCGAAACCTAATACTTGAGCTTCTTTGCAAAGTTTCCTTGGATG 420
Human-BIC_HuRef          GGGGAAGGAGGGGTGTTTCGAAACCTAATACTTGAGCTTCTTTGCAAAGTTTCCTTGGATG 420
*****

Human-BIC_GRCh37.p5      GTTGGGGACGTACCTGTATAATGGCCCTGGACCAGCTTCCCTGTTGGAGTGGCCAGAGAA 480
Human-BIC_HuRef          GTTGGGGACGTACCTGTATAATGGCCCTGGACCAGCTTCCCTGTTGGAGTGGCCAGAGAA 480
*****

Human-BIC_GRCh37.p5      GTGTGTAAAAACACACTAGAGGGGCAGGGTGGAAAAAGAGACTGCCTTCAAAACTTGTATC 540
Human-BIC_HuRef          GTGTGTAAAAACACACTAGAGGGGCAGGGTGGAAAAAGAGACTGCCTTCAAAACTTGTATC 540
*****
```

## Supplemental File2

```
Human-BIC_GRCh37.p5      TTTTCGATTTTCATTTTGA AAAATAACTACAAATCTATTTTAATTTTACAAAGTTAGACTC 600
Human-BIC_HuRef          TTTTCGATTTTCATTTTGA AAAATAACTACAAATCTATTTTAATTTTACAAAGTTAGACTC 600
*****

Human-BIC_GRCh37.p5      ATAGCATTTTAGATATCAATGTCTTCATTTAACAGAAGTGAAGATGGAGCAAACGCTCAA 660
Human-BIC_HuRef          ATAGCATTTTAGATATCAATGTCTTCATTTAACAGAAGTGAAGATGGAGCAAACGCTCAA 660
*****

Human-BIC_GRCh37.p5      TCAGCGTCTGTATTTATTTCGCTCCTGTTGTGCCAGGGTGCGTTTTTGGCCGAGCGGTTGCC 720
Human-BIC_HuRef          TCAGCGTCTGTATTTATTTCGCTCCTGTTGTGCCAGGGTGCGTTTTTGGCCGAGCGGTTGCC 720
*****

Human-BIC_GRCh37.p5      TTTCTTTACTCACAAAACCCCTTGATGTCTGTCTCCACGTTTTTACGAGGGAGAGCCGG 780
Human-BIC_HuRef          TTTCTTTACTCACAAAACCCCTTGATGTCTGTCTCCACGTTTTTACGAGGGAGAGCCGG 780
*****

Human-BIC_GRCh37.p5      ATCTTTTGAAGTTTGTATCATCTAAAGCAGGTATATTGGGATGACTATGGATAGAATTTA 840
Human-BIC_HuRef          ATCTTTTGAAGTTTGTATCATCTAAAGCAGGTATATTGGGATGACTATGGATAGAATTTA 840
*****

Human-BIC_GRCh37.p5      ACCTGAAAACACTGAAGTTGACAGCTGACAAAGATATAAGAATCCAAAGTATGTTAAAAA 900
Human-BIC_HuRef          ACCTGAAAACACTGAAGTTGACAGCTGACAAAGATATAAGAATCCAAAGTATGTTAAAAA 900
*****

Human-BIC_GRCh37.p5      TTAAGGAGCTGAGGCCACAGAAGTGAAGTTACTTTTCCAGCATCACACAGCAGATCTAG 960
Human-BIC_HuRef          TTAAGGAGCTGAGGCCACAGAAGTGAAGTTACTTTTCCAGCATCACACAGCAGATCTAG 960
*****

Human-BIC_GRCh37.p5      GACCCTGTGTGATTTGAAAAGGCCAAGGTATCTAATGATGCTCATAATTTAGTTTACATT 1020
Human-BIC_HuRef          GACCCTGTGTGATTTGAAAAGGCCAAGGTATCTAATGATGCTCATAATTTAGTTTACATT 1020
*****

Human-BIC_GRCh37.p5      TTGTGTCAAATAGATGAGGTCAAGTGGACATTATGTGTATATTCCAAAGCCAAAATTACT 1080
Human-BIC_HuRef          TTGTGTCAAATAGATGAGGTCAAGTGGACATTATGTGTATATTCCAAAGCCAAAATTACT 1080
*****

Human-BIC_GRCh37.p5      GCTTGTAATATCCATTTCATCTCTCCGAAGACGTAGTGCCTCTTTTATATGGCTTTAACCT 1140
Human-BIC_HuRef          GCTTGTAATATCCATTTCATCTCTCCGAAGACGTAGTGCCTCTTTTATATGGCTTTAACCT 1140
*****
```

## Supplemental File2

|                     |                                                               |      |
|---------------------|---------------------------------------------------------------|------|
| Human-BIC_GRCh37.p5 | AATGTATAATCGAAGTGAATTAGGGCAGCCAGACTTTTAAATCACAGGACTGATCTTTTAA | 1200 |
| Human-BIC_HuRef     | AATGTATAATCGAAGTGAATTAGGGCAGCCAGACTTTTAAATCACAGGACTGATCTTTTAA | 1200 |
|                     | *****                                                         |      |
| Human-BIC_GRCh37.p5 | AAACGGGTATATGTAAAGTTAATTGCTTATCTATGTGAACAGTAATATACACTATAAAAA  | 1260 |
| Human-BIC_HuRef     | AAACGGGTATATGTAAAGTTAATTGCTTATCTATGTGAACAGTAATATACACTATAAAAA  | 1260 |
|                     | *****                                                         |      |
| Human-BIC_GRCh37.p5 | GTTTTCAAGGCAACTTCCTGCCTGTGGTTTAAATTTGATAGTCACAATGATAGGAAATTGG | 1320 |
| Human-BIC_HuRef     | GTTTTCAAGGCAACTTCCTGCCTGTGGTTTAAATTTGATAGTCACAATGATAGGAAATTGG | 1320 |
|                     | *****                                                         |      |
| Human-BIC_GRCh37.p5 | CAGGGTTAGGTGGTGGTATCTACATTTTGCCCATGAGGACTTGTGGCTCAGAGAATTTGA  | 1380 |
| Human-BIC_HuRef     | CAGGGTTAGGTGGTGGTATCTACATTTTGCCCATGAGGACTTGTGGCTCAGAGAATTTGA  | 1380 |
|                     | *****                                                         |      |
| Human-BIC_GRCh37.p5 | GTTTTTCTAGTAAGGTCAGTCCCTAGTGCACAGCCTGCTTTTAGGTACGGATGTG       | 1440 |
| Human-BIC_HuRef     | GTTTTTCTAGTAAGGTCAGTCCCTAGTGCACAGCCTGCTTTTAGGTACGGATGTG       | 1440 |
|                     | *****                                                         |      |
| Human-BIC_GRCh37.p5 | GGATGGGGGTGTCGGCAGACCACAGGGTTTTGACTCTCAGTTTGGGCTCATTTCCATGAC  | 1500 |
| Human-BIC_HuRef     | GGATGGGGGTGTCGGCAGACCACAGGGTTTTGACTCTCAGTTTGGGCTCATTTCCATGAC  | 1500 |
|                     | *****                                                         |      |
| Human-BIC_GRCh37.p5 | TCCTTGCTGCCTCCCTGATTTCTGTCAAATGACCAAAGCACATTTAGTAATTACTTCTGC  | 1560 |
| Human-BIC_HuRef     | TCCTTGCTGCCTCCCTGATTTCTGTCAAATGACCAAAGCACATTTAGTAATTACTTCTGC  | 1560 |
|                     | *****                                                         |      |
| Human-BIC_GRCh37.p5 | TGCAAGGACTACTCCTTATTAGGCTGTGATAAGTAAGTTTCTCACATAGTGGGTCAGCT   | 1620 |
| Human-BIC_HuRef     | TGCAAGGACTACTCCTTATTAGGCTGTGATAAGTAAGTTTCTCACATAGTGGGTCAGCT   | 1620 |
|                     | *****                                                         |      |
| Human-BIC_GRCh37.p5 | CACTCTGGCCACAGGACCCAGCTTCCTAACCACACACATTAAGAAAGAGAAAAATTAGCA  | 1680 |
| Human-BIC_HuRef     | CACTCTGGCCACAGGACCCAGCTTCCTAACCACACACATTAAGAAAGAGAAAAATTAGCA  | 1680 |
|                     | *****                                                         |      |
| Human-BIC_GRCh37.p5 | CTGTCTGAGACCTACAACCCTTCAAGGGGAGAACAGTGGTGTTCACAAAATGTCTACTT   | 1740 |
| Human-BIC_HuRef     | CTGTCTGAGACCTACAACCCTTCAAGGGGAGAACAGTGGTGTTCACAAAATGTCTACTT   | 1740 |
|                     | *****                                                         |      |

## Supplemental File2

```
Human-BIC_GRCh37.p5      TTGTTTTAACCTAGTCATGTGTA AAAAAGTGTAATTCAC TGGTCTTTACCAAAAAAAAAAAAA 1800
Human-BIC_HuRef          TTGTTTTAACCTAGTCATGTGTA AAAAAGTGTAATTCAC TGGTCTTTACCAAAAAAAAAAAAA 1800
*****

Human-BIC_GRCh37.p5      AAAAAAAAAACAACAACAAAAAAA AACAGGCATCATAGTCTGCCTGTGCTGGACGCTATGC 1860
Human-BIC_HuRef          AAAAAAAAAACAACAACAAAAAAA AACAGGCATCATAGTCTGCCTGTGCTGGACGCTATGC 1860
*****

Human-BIC_GRCh37.p5      TAGACACTGGAGAGACAAAAGGTGAGCAGGATAGGCACAACCC TACCCTTACAAACCCAGA 1920
Human-BIC_HuRef          TAGACACTGGAGAGACAAAAGGTGAGCAGGATAGGCACAACCC TACCCTTACAAACCCAGA 1920
*****

Human-BIC_GRCh37.p5      AAGTTAGAGGAAAGGCCATCAGGACATTGCTGTGCAATTTGATATCATTTCAATTTTGGT 1980
Human-BIC_HuRef          AAGTTAGAGGAAAGG-CCATCAGGACATTGCTGTGCAATTTGATATCATTTCAATTTTGGT 1979
***** *

Human-BIC_GRCh37.p5      AACATAGATATTTGAACTAATTAGAAATGTGCTACAAATTTTGCCATTCTTTACTTTCCAT 2040
Human-BIC_HuRef          AACATAGATATTTGAACTAATTAGAAATGTGCTACAAATTTTGCCATTCTTTACTTTCCAT 2039
*****

Human-BIC_GRCh37.p5      ATGCCAACATGGAAAATTTGTAACCCCTCATCTTTAAATACCTCATCTTACCAGTCCTCTA 2100
Human-BIC_HuRef          ATGCCAACATGGAAAATTTGTAACCCCTCATCTTTAAATACCTCATCTTACCAGTCCTCTA 2099
*****

Human-BIC_GRCh37.p5      TAAATCAAAAAATCTACCCCAAAAAGCCCTAGGTTTTAACTTTTGAAAAGTTTTTTTTTTA 2160
Human-BIC_HuRef          TAAATCAAAAAATCTACCCCAAAAAGCCCTAGGTTTTAACTTTTGAAAAGTTTTTTTTTTA 2159
*****

Human-BIC_GRCh37.p5      TCAGCTTTTCAGGTCATGACTAAGATCTGCCATTCAATTTAAAGGAATTCTTTCATTTTA 2220
Human-BIC_HuRef          TCAGCTTTTCAGGTCATGACTAAGATCTGCCATTCAATTTAAAGGAATTCTTTCATTTTA 2219
*****

Human-BIC_GRCh37.p5      GAGTAATAGTTACTAAAATCCTTTATTCTACCTCCTTGAGAATCTAATGGAAATTTTAT 2280
Human-BIC_HuRef          GAGTAATAGTTACTAAAATCCTTTATTCTACCTCCTTGAGAATCTAATGGAAATTTTAT 2279
*****

Human-BIC_GRCh37.p5      ATGCTCTTCCCAGAAAATTTTGTTAATGTGTATCCTCACACACCAATTTGCATTTCGATG 2340
Human-BIC_HuRef          ATGCTCTTCCCAGAAAATTTTGTTAATGTGTATCCTCACACACCAATTTGCATTTCGATG 2339
*****
```

## Supplemental File2

|                     |                                                                |      |
|---------------------|----------------------------------------------------------------|------|
| Human-BIC_GRCh37.p5 | TTAGCAGGCTAGAGACTTCCTTGAATCTCAGCCATGACCCTCTTCGGGGGTCCACTTTCA   | 2400 |
| Human-BIC_HuRef     | TTAGCAGGCTAGAGACTTCCTTGAATCTCAGCCATGACCCTCTTCGGGGGTCCACTTTCA   | 2399 |
| *****               |                                                                |      |
| Human-BIC_GRCh37.p5 | TAATCAGTATTCTAAACCTAGTAGGCATAAATAGCTTGAATAGAGGAAAGTGGTATGTAG   | 2460 |
| Human-BIC_HuRef     | TAATCAGTATTCTAAACCTAGTAGGCATAAATAGCTTGAATAGAGGAAAGTGGTATGTAG   | 2459 |
| *****               |                                                                |      |
| Human-BIC_GRCh37.p5 | ACTCTTGCCCTTCACTTGGACTGGGCACCTCTATCACTTGGACTGGGCACCAGCTAGTGC   | 2520 |
| Human-BIC_HuRef     | ACTCTTGCCCTTCACTTGGACTGGGCACCTCTATCACTTGGACTGGGCACCAGCTAGTGC   | 2519 |
| *****               |                                                                |      |
| Human-BIC_GRCh37.p5 | CCTTAACTAGCTGGTGTCTCCATTTTTGATAGTCATTGGCTATTGCTTAGCTGAAGCTAT   | 2580 |
| Human-BIC_HuRef     | CCTTAACTAGCTGGTGTCTCCATTTTTGATAGTCATTGGCTATTGCTTAGCTGAAGCTAT   | 2579 |
| *****               |                                                                |      |
| Human-BIC_GRCh37.p5 | TGATTTTAAACAGCCTTATTGTTTTGATATCAGGCTGCCACTCTGCAGAAGTCTAATACTG  | 2640 |
| Human-BIC_HuRef     | TGATTTTAAACAGCCTTATTGTTTTGATATCAGGCTGCCACTCTGCAGAAGTCTAATACTG  | 2639 |
| *****               |                                                                |      |
| Human-BIC_GRCh37.p5 | GGGAAGGAGCACCGCCTGAGAACCATGGTTTTGTTTTCTAGGACCAACTCTGCAGATTTCT  | 2700 |
| Human-BIC_HuRef     | GGGAAGGAGCACCGCCTGAGAACCATGGTTTTGTTTTCTAGGACCAACTCTGCAGATTTCT  | 2699 |
| *****               |                                                                |      |
| Human-BIC_GRCh37.p5 | GTGCCTCATTTTGCTCATCTCTAAGATGGGTGGTTGATGGGTGGCAGGGACTGAACCATT   | 2760 |
| Human-BIC_HuRef     | GTGCCTCATTTTGCTCATCTCTAAGATGGGTGGTTGATGGGTGGCAGGGACTGAACCATT   | 2759 |
| *****               |                                                                |      |
| Human-BIC_GRCh37.p5 | TCTAAAATCCCTTACACTGATGAAATTTCTGTGATTCCAGTGTAACCTACCAAGCTCACTTT | 2820 |
| Human-BIC_HuRef     | TCTAAAATCCCTTACACTGATGAAATTTCTGTGATTCCAGTGTAACCTACCAAGCTCACTTT | 2819 |
| *****               |                                                                |      |
| Human-BIC_GRCh37.p5 | CATATACCTCCTGAGACACAGCTGGTCTTAGTGAATTTATATCCTCTATGTCCAAAGTAA   | 2880 |
| Human-BIC_HuRef     | CATATACCTCCTGAGACACAGCTGGTCTTAGTGAATTTATATCCTCTATGTCCAAAGTAA   | 2879 |
| *****               |                                                                |      |
| Human-BIC_GRCh37.p5 | GTCAAAGTAAGTACCCTATAAATTCCTATAGAAATGTATTTTTGTCTTTCACTGATCTTA   | 2940 |
| Human-BIC_HuRef     | GTCAAAGTAAGTACCCTATAAATTCCTATAGAAATGTATTTTTGTCTTTCACTGATCTTA   | 2939 |
| *****               |                                                                |      |

## Supplemental File2

|                     |                                                                |      |
|---------------------|----------------------------------------------------------------|------|
| Human-BIC_GRCh37.p5 | CTGGACTCAAAACTGTTACATGTTTCCTTAAATTAGATAGAATAAAAAAATTGTGAAACA   | 3000 |
| Human-BIC_HuRef     | CTGGACTCAAAACTGTTACATGTTTCCTTAAATTAGATAGAATAAAAAAATTGTGAAACA   | 2999 |
|                     | *****                                                          |      |
| Human-BIC_GRCh37.p5 | CTACTTTTCAAGGAAAAATATTACAATTTTAAAAGCCTCTTTTTATCCCACCTCTCAGTA   | 3060 |
| Human-BIC_HuRef     | CTACTTTTCAAGGAAAAATATTACAATTTTAAAAGCCTCTTTTTATCCCACCTCTCAGTA   | 3059 |
|                     | *****                                                          |      |
| Human-BIC_GRCh37.p5 | GCTACAACCTTTCATATACGAGTTTTCACATATATATGAAAAAATTTTCTTATCTCAGACT  | 3120 |
| Human-BIC_HuRef     | GCTACAACCTTTCATATACGAGTTTTCACATATATATGAAAAAATTTTCTTATCTCAGACT  | 3119 |
|                     | *****                                                          |      |
| Human-BIC_GRCh37.p5 | CTTAAGGAAATGCAATGCTTTTAAATATGATCACTGCTGTGTAATTCTCATCTGCCCTGAA  | 3180 |
| Human-BIC_HuRef     | CTTAAGGAAATGCAATGCTTTTAAATATGATCACTGCTGTGTAATTCTCATCTGCCCTGAA  | 3179 |
|                     | *****                                                          |      |
| Human-BIC_GRCh37.p5 | ACACTTGTCTGTCCATCAATCAATGTATTTGGGTTTACAATATGCAGAGCCTCAAGCAA    | 3240 |
| Human-BIC_HuRef     | ACACTTGTCTGTCCATCAATCAATGTATTTGGGTTTACAATATGCAGAGCCTCAAGCAA    | 3239 |
|                     | *****                                                          |      |
| Human-BIC_GRCh37.p5 | AACCAGTGCAAAGCACATCTATCCTCAAATAGGCACATCATATGTCTGAGCAGTTCAGC    | 3300 |
| Human-BIC_HuRef     | AACCAGTGCAAAGCACATCTATCCTCAAATAGGCACATCATATGTCTGAGCAGTTCAGC    | 3299 |
|                     | *****                                                          |      |
| Human-BIC_GRCh37.p5 | ATCCTCACTCACAAGTCCAAGGCTCTCAGCAATGTGGAAGAAGATGTGATTCTTAAATTT   | 3360 |
| Human-BIC_HuRef     | ATCCTCACTCACAAGTCCAAGGCTCTCAGCAATGTGGAAGAAGATGTGATTCTTAAATTT   | 3359 |
|                     | *****                                                          |      |
| Human-BIC_GRCh37.p5 | ACCACCCTTACACACAGTGACACACTCACCAGAAAGTGAGGCTTAAACATAGCTTAAAGTGG | 3420 |
| Human-BIC_HuRef     | ACCACCCTTACACACAGTGACACACTCACCAGAAAGTGAGGCTTAAACATAGCTTAAAGTGG | 3419 |
|                     | *****                                                          |      |
| Human-BIC_GRCh37.p5 | CTGTAGTTTAAAACAGATTGTGAATATCTGTGCTAATTCTGAGAAACAATTAGCAGACAT   | 3480 |
| Human-BIC_HuRef     | CTGTAGTTTAAAACAGATTGTGAATATCTGTGCTAATTCTGAGAAACAATTAGCAGACAT   | 3479 |
|                     | *****                                                          |      |
| Human-BIC_GRCh37.p5 | ATTAACCAATTAGCACAGATCACTAATATCTGTGCTAATTGTTAGGACAGATTAGCACAG   | 3540 |
| Human-BIC_HuRef     | ATTAACCAATTAGCACAGATCACTAATATCTGTGCTAATTGTTAGGACAGATTAGCACAG   | 3539 |
|                     | *****                                                          |      |



## Supplemental File2

|                     |                                                               |      |
|---------------------|---------------------------------------------------------------|------|
| Human-BIC_GRCh37.p5 | ATATTGCTACCTTGTGTGGGTAGACAGGGTTAAGGCACTGGCAGAAGGAAAGATTAGTGA  | 3600 |
| Human-BIC_HuRef     | ATATTGCTACCTTGTGTGGGTAGACAGGGTTAAGGCACTGGCAGAAGGAAAGATTAGTGA  | 3599 |
|                     | *****                                                         |      |
| Human-BIC_GRCh37.p5 | GGAATATCAAATAGCTGATTTAATGAAATTGTGAGGCCGATGTTTGGATAAGGTGAAACA  | 3660 |
| Human-BIC_HuRef     | GGAATATCAAATAGCTGATTTAATGAAATTGTGAGGCCGATGTTTGGATAAGGTGAAACA  | 3659 |
|                     | *****                                                         |      |
| Human-BIC_GRCh37.p5 | GTGCCCTACAATGACATTTATGCCAGTTCTCCATAAAACAAGAGTGTTCTACACAAATTAT | 3720 |
| Human-BIC_HuRef     | GTGCCCTACAATGACATTTATGCCAGTTCTCCATAAAACAAGAGTGTTCTACACAAATTAT | 3719 |
|                     | *****                                                         |      |
| Human-BIC_GRCh37.p5 | AAGTTCCTGGCTGTCTTAACAAAATGCTATGGTCCTTTATATGCTCACACAAATAATGGT  | 3780 |
| Human-BIC_HuRef     | AAGTTCCTGGCTGTCTTAACAAAATGCTATGGTCCTTTATATGCTCACACAAATAATGGT  | 3779 |
|                     | *****                                                         |      |
| Human-BIC_GRCh37.p5 | TCCAAGCATGGGAAACAGGTGCCAGATTGCCAGGTAGGCATCCCAGCAGCATGCTCCTT   | 3840 |
| Human-BIC_HuRef     | TCCAAGCATGGGAAACAGGTGCCAGATTGCCAGGTAGGCATCCCAGCAGCATGCTCCTT   | 3839 |
|                     | *****                                                         |      |
| Human-BIC_GRCh37.p5 | AGCCACTGATTAACCTTGGCGAAGTTATTTACCTGCCTGTGCCTCAAGGCCCTGTGTT    | 3900 |
| Human-BIC_HuRef     | AGCCACTGATTAACCTTGGCGAAGTTATTTACCTGCCTGTGCCTCAAGGCCCTGTGTT    | 3899 |
|                     | *****                                                         |      |
| Human-BIC_GRCh37.p5 | TCAATGGGGAGGGTGTGAATACTCATTCCCTAAGGTTGTGAGGAGGAATAACTGAGTTAGT | 3960 |
| Human-BIC_HuRef     | TCAATGGGGAGGGTGTGAATACTCATTCCCTAAGGTTGTGAGGAGGAATAACTGAGTTAGT | 3959 |
|                     | *****                                                         |      |
| Human-BIC_GRCh37.p5 | ATACGTCAAACACTTAGGTGCTTGGCACAGAGGGAGCCTGTGTAAGTGTGTTGCTATTATT | 4020 |
| Human-BIC_HuRef     | ATACGTCAAACACTTAGGTGCTTGGCACAGAGGGAGCCTGTGTAAGTGTGTTGCTATTATT | 4019 |
|                     | *****                                                         |      |
| Human-BIC_GRCh37.p5 | TTGTTTCACTAGATGATCTTGTGTATTATAAGAAATCAATTTGGAAGGTGAGATACAAAT  | 4080 |
| Human-BIC_HuRef     | TTGTTTCACTAGATGATCTTGTGTATTATAAGAAATCAATTTGGAAGGTGAGATACAAAT  | 4079 |
|                     | *****                                                         |      |
| Human-BIC_GRCh37.p5 | GCAGTCTGAGAAAGTAAAGACGTTTTAAAGACATTTTACTGTGTCATGAATTTTCAGAGA  | 4140 |
| Human-BIC_HuRef     | GCAGTCTGAGAAAGTAAAGACGTTTTAAAGACATTTTACTGTGTCATGAATTTTCAGAGA  | 4139 |
|                     | *****                                                         |      |

## Supplemental File2

|                     |                                                                |      |
|---------------------|----------------------------------------------------------------|------|
| Human-BIC_GRCh37.p5 | CCACACTGACATGGTAAAAAGTTGTTTGGTTTTTTAGAAATTTTTGTTTCAGAATGCATATC | 4200 |
| Human-BIC_HuRef     | CCACACTGACATGGTAAAAAGTTGTTTGGTTTTTTAGAAATTTTTGTTTCAGAATGCATATC | 4199 |
|                     | *****                                                          |      |
| Human-BIC_GRCh37.p5 | CTTCTCCTTAACCAAAAAGAAAACTACTAAAATACTTCTGAAAATTATTTCCAAGAAAAC   | 4260 |
| Human-BIC_HuRef     | CTTCTCCTTAACCAAAAAGAAAACTACTAAAATACTTCTGAAAATTATTTCCAAGAAAAC   | 4259 |
|                     | *****                                                          |      |
| Human-BIC_GRCh37.p5 | ATTTTGGTGTACCTTTTAGCAGTTACTTTATGACTTAAAGATTAGGATGAACAAAATAAT   | 4320 |
| Human-BIC_HuRef     | ATTTTGGTGTACCTTTTAGCAGTTACTTTATGACTTAAAGATTAGGATGAACAAAATAAT   | 4319 |
|                     | *****                                                          |      |
| Human-BIC_GRCh37.p5 | TATTTTAACTTGGCTTTTACCTGCTTGTAGATAACCTCTAATTTATATAATGGTTCAATT   | 4380 |
| Human-BIC_HuRef     | TATTTTAACTTGGCTTTTACCTGCTTGTAGATAACCTCTAATTTATATAATGGTTCAATT   | 4379 |
|                     | *****                                                          |      |
| Human-BIC_GRCh37.p5 | ATACAGTGGTAAATGTATCTGGGCTTGTTCCTTTTAAAATAGCAAGTGAACATGTGATAG   | 4440 |
| Human-BIC_HuRef     | ATACAGTGGTAAATGTATCTGGGCTTGTTCCTTTTAAAATAGCAAGTGAACATGTGATAG   | 4439 |
|                     | *****                                                          |      |
| Human-BIC_GRCh37.p5 | ATGTAGGGTACTTACAAAGTACTCACCAAGCATTGATGACTGATGTCATTAGTATCATGG   | 4500 |
| Human-BIC_HuRef     | ATGTAGGGTACTTACAAAGTACTCACCAAGCATTGATGACTGATGTCATTAGTATCATGG   | 4499 |
|                     | *****                                                          |      |
| Human-BIC_GRCh37.p5 | CTAACATTCACTGAGCCCTGATTATGAGGCTGGCACCCAATAAATGTTTTGCATTGTCA    | 4560 |
| Human-BIC_HuRef     | CTAACATTCACTGAGCCCTGATTATGAGGCTGGCACCCAATAAATGTTTTGCATTGTCA    | 4559 |
|                     | *****                                                          |      |
| Human-BIC_GRCh37.p5 | CTTCATCTTCACAAAGACTTTTTGAATAGGTTATTCTTTATCTCCATTTTCAGAGAAGCA   | 4620 |
| Human-BIC_HuRef     | CTTCATCTTCACAAAGACTTTTTGAATAGGTTATTCTTTATCTCCATTTTCAGAGAAGCA   | 4619 |
|                     | *****                                                          |      |
| Human-BIC_GRCh37.p5 | ACTAAGCCCTAAAGAGGTTTATTAACCTTGCCAAATACCACACAGCTAGTAACACTGGTGG  | 4680 |
| Human-BIC_HuRef     | ACTAAGCCCTAAAGAGGTTTATTAACCTTGCCAAATACCACACAGCTAGTAACACTGGTGG  | 4679 |
|                     | *****                                                          |      |
| Human-BIC_GRCh37.p5 | GGTCTGGAATGGAACCCAGGCAAGCTGAAAACGCAGACAACAATGAACACTCCTACTTTTC  | 4740 |
| Human-BIC_HuRef     | GGTCTGGAATGGAACCCAGGCAAGCTGAAAACGCAGACAACAATGAACACTCCTACTTTTC  | 4739 |
|                     | *****                                                          |      |

## Supplemental File2

|                     |                                                              |      |
|---------------------|--------------------------------------------------------------|------|
| Human-BIC_GRCh37.p5 | AATTCGATTTGCTAATTGTTAATATTTGCCACACTGGCTTATCTCTCTGTATCCCTACCC | 4800 |
| Human-BIC_HuRef     | AATTCGATTTGCTAATTGTTAATATTTGCCACACTGGCTTATCTCTCTGTATCCCTACCC | 4799 |
| *****               |                                                              |      |
| Human-BIC_GRCh37.p5 | ATCTCTCTCTCTCTCTGTCTATATCTATATGCAAACCTGGCATCTAACTTCTAAATGCTT | 4860 |
| Human-BIC_HuRef     | ATCTCTCTCTCTCTCTGTCTATATCTATATGCAAACCTGGCATCTAACTTCTAAATGCTT | 4859 |
| *****               |                                                              |      |
| Human-BIC_GRCh37.p5 | GAGCACGGATCTCCTAAGAACAAGTACATGGTTCTATGCAATGAAAAGACATGATTATGG | 4920 |
| Human-BIC_HuRef     | GAGCACGGATCTCCTAAGAACAAGTACATGGTTCTATGCAATGAAAAGACATGATTATGG | 4919 |
| *****               |                                                              |      |
| Human-BIC_GRCh37.p5 | CATCCAAGAGTGATTTTAAAAATCAAGGATGAACTTAATTTTTTACCCACAAGTCCAGAC | 4980 |
| Human-BIC_HuRef     | CATCCAAGAGTGATTTTAAAAATCAAGGATGAACTTAATTTTTTACCCACAAGTCCAGAC | 4979 |
| *****               |                                                              |      |
| Human-BIC_GRCh37.p5 | GATGATTTCTACCAGTATTCTCCAGCTTTACTCTGTTTCTTATACTTGACAGACTGAGCT | 5040 |
| Human-BIC_HuRef     | GATGATTTCTACCAGTATTCTCCAGCTTTACTCTGTTTCTTATACTTGACAGACTGAGCT | 5039 |
| *****               |                                                              |      |
| Human-BIC_GRCh37.p5 | CCAAGCCTGGAATCTTCTAAAAAGGGTCCACTGCCAATCTGGAATGCCAACAAATCTTAT | 5100 |
| Human-BIC_HuRef     | CCAAGCCTGGAATCTTCTAAAAAGGGTCCACTGCCAATCTGGAATGCCAACAAATCTTAT | 5099 |
| *****               |                                                              |      |
| Human-BIC_GRCh37.p5 | TAATATATCTCCACATTTGTAAGCTTCTACTAAATTCTCCAAGAACCTGCATATCAGTTA | 5160 |
| Human-BIC_HuRef     | TAATATATCTCCACATTTGTAAGCTTCTACTAAATTCTCCAAGAACCTGCATATCAGTTA | 5159 |
| *****               |                                                              |      |
| Human-BIC_GRCh37.p5 | AGTCCTGAAATGCTCCAGTGCCAAATAAAAGCCCCTGTGCAGATAGAAATGCTTTTGGT  | 5220 |
| Human-BIC_HuRef     | AGTCCTGAAATGCTCCAGTGCCAAATAAAAGCCCCTGTGCAGATAGAAATGCTTTTGGT  | 5219 |
| *****               |                                                              |      |
| Human-BIC_GRCh37.p5 | GACTCTCAAACATTTATTCAAAGGTATTTAGTGAGTATCTGTCAGCTGTATATCCAGCAC | 5280 |
| Human-BIC_HuRef     | GACTCTCAAACATTTATTCAAAGGTATTTAGTGAGTATCTGTCAGCTGTATATCCAGCAC | 5279 |
| *****               |                                                              |      |
| Human-BIC_GRCh37.p5 | TGAGGGAAGACTCAGTCTCTGCCATCACATACACCTCAGCACTAAGAAGAGACACATGAA | 5340 |
| Human-BIC_HuRef     | TGAGGGAAGACTCAGTCTCTGCCATCACATACACCTCAGCACTAAGAAGAGACACATGAA | 5339 |
| *****               |                                                              |      |

## Supplemental File2

|                     |                                                               |      |
|---------------------|---------------------------------------------------------------|------|
| Human-BIC_GRCh37.p5 | ATAATTACCATCCAGTGTGATAAGTGCTCTGACAGAGGATGGAGTGAGGACTAGTCACCT  | 5400 |
| Human-BIC_HuRef     | ATAATTACCATCCAGTGTGATAAGTGCTCTGACAGAGGATGGAGTGAGGACTAGTCACCT  | 5399 |
|                     | *****                                                         |      |
| Human-BIC_GRCh37.p5 | TGGGGAAGACAGAGAAGCAGGGTCCCACCAGGAGATGAG---AAGCCAGCCTCCAGGAGT  | 5457 |
| Human-BIC_HuRef     | TGGGGAAGACAGAGAAGCAGGGTCCCACCAGGAGATGAGGAGAAGCCAGCCTCCAGGAGT  | 5459 |
|                     | *****                                                         |      |
| Human-BIC_GRCh37.p5 | GCGCTATCTGAGAGGGCAAGAGAAGGAAGGCAAAGAGGACGGGTCCATACTTGAACAAC   | 5517 |
| Human-BIC_HuRef     | GCGCTATCTGAGAGGGCAAGAGAAGGAAGGCAAAGAGGACGGGTCCATACTTGAACAAC   | 5519 |
|                     | *****                                                         |      |
| Human-BIC_GRCh37.p5 | TGAAGTAGGTGTATCTAGTGCCTAAGAGTGTGTATGGTGACATCTTGTGGAGCAGTGAAC  | 5577 |
| Human-BIC_HuRef     | TGAAGTAGGTGTATCTAGTGCCTAAGAGTGTGTATGGTGACATCTTGTGGAGCAGTGAAC  | 5579 |
|                     | *****                                                         |      |
| Human-BIC_GRCh37.p5 | ATGACCCTCATTGGTTTGTAAAGCATTGGGTCAAATGCCACGGGAATGTAACAGGTAA    | 5637 |
| Human-BIC_HuRef     | ATGACCCTCATTGGTTTGTAAAGCATTGGGTCAAATGCCACGGGAATGTAACAGGTAA    | 5639 |
|                     | *****                                                         |      |
| Human-BIC_GRCh37.p5 | ATGGTCTTTGCCTTATAACACAGGGTATCCCATCCGTGTAAGACAATGAATTTTTTAAAAA | 5697 |
| Human-BIC_HuRef     | ATGGTCTTTGCCTTATAACACAGGGTATCCCATCCGTGTAAGACAATGAATTTTTTAAAAA | 5699 |
|                     | *****                                                         |      |
| Human-BIC_GRCh37.p5 | GGCAAAACCAAACCTTTTGTTTACATCATTTCCTTAAATAGTTCTTAGTACACAAATTC   | 5757 |
| Human-BIC_HuRef     | GGCAAAACCAAACCTTTTGTTTACATCATTTCCTTAAATAGTTCTTAGTACACAAATTC   | 5759 |
|                     | *****                                                         |      |
| Human-BIC_GRCh37.p5 | TTCCTTGCTTGGGGCCATTATGGTGTGTGGAAGTAGAAAAAGATAAACTGTAGCTTACAG  | 5817 |
| Human-BIC_HuRef     | TTCCTTGCTTGGGGCCATTATGGTGTGTGGAAGTAGAAAAAGATAAACTGTAGCTTACAG  | 5819 |
|                     | *****                                                         |      |
| Human-BIC_GRCh37.p5 | AAATAGAAAAGCAATTTTTTCTATGATAGAGGCAAACGGATACAAAAACAAACAGGTA    | 5877 |
| Human-BIC_HuRef     | AAATAGAAAAGCAATTTTTTCTATGATAGAGGCATACGGATACAAAAACAAACAGGTA    | 5879 |
|                     | *****:*****                                                   |      |
| Human-BIC_GRCh37.p5 | ACACATAATAAGTTCCAAATGAGGCATTTTGTGAAATTCAGTGTTGAGCATAAACAGTG   | 5937 |
| Human-BIC_HuRef     | ACACATAATAAGTTCCAAATGAGGCATTTTGTGAAATTCAGTGTTGAGCATAAACAGTG   | 5939 |
|                     | *****                                                         |      |

## Supplemental File2

|                     |                                                               |      |
|---------------------|---------------------------------------------------------------|------|
| Human-BIC_GRCh37.p5 | AACTCAAATGCACAGAGGAGGCGTCATGGAAGGGTGACAAAACACTCCAGAGCAATAACA  | 5997 |
| Human-BIC_HuRef     | AACTCAAATGCACAGAGGAGGCGTCATGGAAGGGTGACAAAACACTCCAGAGCAATAACA  | 5999 |
|                     | *****                                                         |      |
| Human-BIC_GRCh37.p5 | GCTACCCTATTTTCTGTTCCCTGGGAGTAGGGAGAAAAGACATCAAATCAAATTATAAA   | 6057 |
| Human-BIC_HuRef     | GCTACCCTATTTTCTGTTCCCTGGGAGTAGGGAGAAAAGACATCAAATCAAATTATAAA   | 6059 |
|                     | *****                                                         |      |
| Human-BIC_GRCh37.p5 | TTTAAAAAAGTATTTAAATTTCTCTTATGGAAATATATTAAGAAGTTTGTAGGCAAATGG  | 6117 |
| Human-BIC_HuRef     | TTTAAAAAAGTATTTAAATTTCTCTTATGGAAATATATTAAGAAGTTTGTAGGCAAATGG  | 6119 |
|                     | *****                                                         |      |
| Human-BIC_GRCh37.p5 | AAAACGTTTTGTGGAAACAAGAAATAAGAAAGAATGGCCATCACTTAAAGCAACAGAATG  | 6177 |
| Human-BIC_HuRef     | AAAACGTTTTGTGGAAACAAGAAATAAGAAAGAATGGCCATCACTTAAAGCAACAGAATG  | 6179 |
|                     | *****                                                         |      |
| Human-BIC_GRCh37.p5 | TATCTCTCCCCTAGCTCTCCCCTCCCTACCCACAGCTTTATTACATTTGTTCTATAAC    | 6237 |
| Human-BIC_HuRef     | TATCTCTCCCCTAGCTCTCCCCTCCCTACCCACAGCTTTATTACATTTGTTCTATAAC    | 6239 |
|                     | *****                                                         |      |
| Human-BIC_GRCh37.p5 | ATTTTCAGCACAGTTTCAGACCTTCCGCTGAGCCAGTGTGAGGTGAGGGTGTGAGGAAGCG | 6297 |
| Human-BIC_HuRef     | ATTTTCAGCACAGTTTCAGACCTTCCGCTGAGCCAGTGTGAGGTGAGGGTGTGAGGAAGCG | 6299 |
|                     | *****                                                         |      |
| Human-BIC_GRCh37.p5 | AGTCCCTGCAGTCAGACTCCAGCTGGCTGTCGTCCTGCTTCTGCTTATTCCACAGAATGA  | 6357 |
| Human-BIC_HuRef     | AGTCCCTGCAGTCAGACTCCAGCTGGCTGTCGTCCTGCTTCTGCTTATTCCACAGAATGA  | 6359 |
|                     | *****                                                         |      |
| Human-BIC_GRCh37.p5 | GTCTGGTGGGGGAGAGGAAATTCCTAACCTGTTTTTTTTTACACATCTTCATCAGAAAAG  | 6417 |
| Human-BIC_HuRef     | GCCTGGTGGGGGAGAGGAAATTCCTAACCTGTTTTTTTTTACACATCTTCATCAGAAAAG  | 6419 |
|                     | * *****                                                       |      |
| Human-BIC_GRCh37.p5 | CGAAAGCACTAATTACTGTCCATAATAAACTACTGGGAAGGTTACTTAGCTTGTAAGTA   | 6477 |
| Human-BIC_HuRef     | CGAAAGCACTAATTACTGTCCATAATAAACTACTGGGAAGGTTACTTAGCTTGTAAGTA   | 6479 |
|                     | *****                                                         |      |
| Human-BIC_GRCh37.p5 | AGTTCCACAAAGCCATTTTCAGTAAAAACTTCTGTTCTAAAATTTGGGAAAAGCAGGATA  | 6537 |
| Human-BIC_HuRef     | AGTTCCACAAAGCCATTTTCAGTAAAAACTTCTGTTCTAAAATTTGGGAAAAGCAGGATA  | 6539 |
|                     | *****                                                         |      |

## Supplemental File2

|                     |                                                               |      |
|---------------------|---------------------------------------------------------------|------|
| Human-BIC_GRCh37.p5 | ATCCTCTAAGGCTGACATTCTTTCTCTTTTGTGCATTTACAACCTAAACGGTCACTGATAC | 6597 |
| Human-BIC_HuRef     | ATCCTCTAAGGCTGACATTCTTTCTCTTTTGTGCATTTACAACCTAAACGGTCACTGATAC | 6599 |
|                     | *****                                                         |      |
| Human-BIC_GRCh37.p5 | ACATTTCCACAGTGACCCTGCAATATCCACATTGGCTTTCTTCTAAGACACTTCAAAAAT  | 6657 |
| Human-BIC_HuRef     | ACATTTCCACAGTGACCCTGCAATATCCACATTGGCTTTCTTCTAAGACACTTCAAAAAT  | 6659 |
|                     | *****                                                         |      |
| Human-BIC_GRCh37.p5 | ACATCACACCTTTATGTGTTAAATATCACTATTGGCATATATCTTTAAAAACATTTATTT  | 6717 |
| Human-BIC_HuRef     | ACATCACACCTTTATGTGTTAAATATCACTATTGGCATATATCTTTAAAAACATTTATTT  | 6719 |
|                     | *****                                                         |      |
| Human-BIC_GRCh37.p5 | TCTTAATTCTCAAAAATACAGAAAAGAATGTTATGCTATTGTGTGCACAAACTGCTATTTT | 6777 |
| Human-BIC_HuRef     | TCTTAATTCTCAAAAATACAGAAAAGAATGTTATGCTATTGTGTGCACAAACTGCTATTTT | 6779 |
|                     | *****                                                         |      |
| Human-BIC_GRCh37.p5 | CAATAAGGAGCTCTTAATTTAGAAAAGTTGCTATTTTTCAATAAAGAGCTCTCAATTAGAA | 6837 |
| Human-BIC_HuRef     | CAATAAGGAGCTCTTAATTTAGAAAAGTTGCTATTTTTCAATAAAGAGCTCTCAATTAGAA | 6839 |
|                     | *****                                                         |      |
| Human-BIC_GRCh37.p5 | AATATCAAGAAGTGATGTTAAGTTTTTATGGAAATAAATAAAGTATCATGACATGAAAAG  | 6897 |
| Human-BIC_HuRef     | AATATCAAGAAGTGATGTTAAGTTTTTATGGAAATAAATAAAGTATCATGACATGAAAAG  | 6899 |
|                     | *****                                                         |      |
| Human-BIC_GRCh37.p5 | TTTATAATTTTTCCCCCAGCAATGGCTTACTCAGGGAATTTTTCTTATATGTAAAGTTAA  | 6957 |
| Human-BIC_HuRef     | TTTATAATTTTTCCCCCAGCAATGGCTTACTCAGGGAATTTTTCTTATATGTAAAGTTAA  | 6959 |
|                     | *****                                                         |      |
| Human-BIC_GRCh37.p5 | TGATCTGAAAAGTGGTAATCTTATCATTCACCAAGATTTTCAGGATATAAGTTATTCCTAC | 7017 |
| Human-BIC_HuRef     | TGATCTGAAAAGTGGTAATCTTATCATTCACCAAGATTTTCAGGATATAAGTTATTCCTAC | 7019 |
|                     | *****                                                         |      |
| Human-BIC_GRCh37.p5 | AGAACAATCCATTTTTACCTTTAAAGATGAGTTTTGTGTACTTCAGAAGATGTGACGCCAG | 7077 |
| Human-BIC_HuRef     | AGAACAATCCATTTTTACCTTTAAAGATGAGTTTTGTGTACTTCAGAAGATGTGACGCCAG | 7079 |
|                     | *****                                                         |      |
| Human-BIC_GRCh37.p5 | TTGGCCACCATCTCAATCAGTAGTAAGTCACACCATCAATCCCTTGTTAATGATGGAAC   | 7137 |
| Human-BIC_HuRef     | TTGGCCACCATCTCAATCAGTAGTAAGTCACACCATCAATCCCTTGTTAATGATGGAAC   | 7139 |
|                     | *****                                                         |      |

## Supplemental File2

|                     |                                                                      |      |
|---------------------|----------------------------------------------------------------------|------|
| Human-BIC_GRCh37.p5 | CATGTGAAGTCAAGAGGAAACATAATACTCTTTACCTCATTCCCTGGTAGCAGAGAAGTT         | 7197 |
| Human-BIC_HuRef     | CATGTGAAGTCAAGAGGAAACATAATACTCTTTACCTCATTCCCTGGTAGCAGAGAAGTT         | 7199 |
|                     | *****                                                                |      |
| Human-BIC_GRCh37.p5 | GACTCATCTTTAATGTCAGTTATTGAGATGTAACACAGAATCATATTCTACAGAAAATAT         | 7257 |
| Human-BIC_HuRef     | GACTCATCTTTAATGTCAGTTATTGAGATGTAACACAGAATCATATTCTACAGAAAATAT         | 7259 |
|                     | *****                                                                |      |
| Human-BIC_GRCh37.p5 | GTGATAAACTTTACACAAATGAATACACTTTAGAAAGGCAGTCATTTGGATTTTCTTTTT         | 7317 |
| Human-BIC_HuRef     | GTGATAAACTTTACACAAATGAATACACTTTAGAAAGGCAGTCATTTGGATTTTCTTTTT         | 7319 |
|                     | *****                                                                |      |
| Human-BIC_GRCh37.p5 | GTCAGAGAACATTGCAAGTCTTCCTGAAGAATTTCTGAGAAATTAACACTTTATATGAC          | 7377 |
| Human-BIC_HuRef     | GTCAGAGAACATTGCAAGTCTTCCTGAAGAATTTCTGAGAAATTAACACTTTATATGAC          | 7379 |
|                     | *****                                                                |      |
| Human-BIC_GRCh37.p5 | ATTTTACAGCATGTAGAGAGGTTGAAACTCAGAGAACTAAAACCTCAGATGATAGTCTAAA        | 7437 |
| Human-BIC_HuRef     | ATTTTACAGCATGTAGAGAGGTTGAAACTCAGAGAACTAAAACCTCAGATGATAGTCTAAA        | 7439 |
|                     | *****                                                                |      |
| Human-BIC_GRCh37.p5 | TACTTAATTTGTTGCTGCTTTATGCTGGACATGAAAAGTGTGAGCTTAAATTATAAATAA         | 7497 |
| Human-BIC_HuRef     | TACTTAATTTGTTGCTGCTTTATGCTGGACATGAAAAGTGTGAGCTTAAATTATAAATAA         | 7499 |
|                     | *****                                                                |      |
| Human-BIC_GRCh37.p5 | AAAACCTATTGAGCTATCAAACCTATTTGGGGTACATCCTTATCTTTCTCTAAATTACTCT        | 7557 |
| Human-BIC_HuRef     | AAAACCTGTTGAGCTATCAAACCTATTTGGGGTACATCCTTATCTTTCTCTAAATTACTCT        | 7559 |
|                     | *****                                                                |      |
| Human-BIC_GRCh37.p5 | TTATTCCCATTAAAATCCACCTATCCCGGGTCTCTCTCCTCAGCCCTTCACCTCTGCTT          | 7617 |
| Human-BIC_HuRef     | TTATTCCCATTAAAATCCACCTATCCCGGGTCTCTCTCCTCAGCCCTTCACCTCTGCTT          | 7619 |
|                     | *****                                                                |      |
| Human-BIC_GRCh37.p5 | TCAAAGATGACTAACTAACCTAATAAACACATCTAAGGTGATGTGTCAACTTCAACCCCA         | 7677 |
| Human-BIC_HuRef     | TCAAAGATGACTAACTAACCTAATAAACACATCTAAGGTGATGTGTCAACTTCAACCCCA         | 7679 |
|                     | *****                                                                |      |
| Human-BIC_GRCh37.p5 | ACCCTTTTTCCCCAG <b>ATAACTTGTCTGCATTTCAAGAACAACCTACCAGAGACCTTACCT</b> | 7737 |
| Human-BIC_HuRef     | ACCCTTTTTCCCCAG <b>ATAACTTGTCTGCATTTCAAGAACAACCTACCAGAGACCTTACCT</b> | 7739 |
|                     | *****                                                                |      |

## Supplemental File2

|                     |                                                                     |      |
|---------------------|---------------------------------------------------------------------|------|
| Human-BIC_GRCh37.p5 | <b>GTCACCTTGGCTCTCCACCCAATGGAGATGGCTCTAATG</b> GTAAGGAATTCTATCTTAAG | 7797 |
| Human-BIC_HuRef     | <b>GTCACCTTGGCTCTCCACCCAATGGAGATGGCTCTAATG</b> GTAAGGAATTCTATCTTAAG | 7799 |
|                     | *****                                                               |      |
| Human-BIC_GRCh37.p5 | TAAAAGGGAAGGGAAACACGCTGACAGATGCAGTTTTTTATAAAGGCAGGTCATTGGGGCA       | 7857 |
| Human-BIC_HuRef     | TAAAAGGGAAGGGAAACACGCTGACAGATGCAGTTTTTTATAAAGGCAGGTCATTGGGGCA       | 7859 |
|                     | *****                                                               |      |
| Human-BIC_GRCh37.p5 | CCAAGTTGGCAGCCGCTTTCAACTTTTGATTCTACCTCAAAAGGTAACCAAGAAATCGTT        | 7917 |
| Human-BIC_HuRef     | CCAAGTTGGCAGCCGCTTTCAACTTTTGATTCTACCTCAAAAGGTAACCAAGAAATCGTT        | 7919 |
|                     | *****                                                               |      |
| Human-BIC_GRCh37.p5 | GTTATTCTAAAGATTATGACAAGTCCAAAGTTTCACAGAATCCTGATTTTTTATACACTTG       | 7977 |
| Human-BIC_HuRef     | GTTATTCTAAAGATTATGACAAGTCCAAAGTTTCACAGAATCCTGATTTTTTATACACTTG       | 7979 |
|                     | *****                                                               |      |
| Human-BIC_GRCh37.p5 | CATTAATCACTGCTTACTTCCATGATGTAAACCAAACTGCAGCGGCAGAATATAGAGAA         | 8037 |
| Human-BIC_HuRef     | CATTAATCACTGCTTACTTCCATGATGTAAACCAAACTGCAGCGGCAGAATATAGAGAA         | 8039 |
|                     | *****                                                               |      |
| Human-BIC_GRCh37.p5 | TCAGAATAAATTCTGATAGAAAAGGCAGATACTGTTTCCACATATACAAGTATATGCTAA        | 8097 |
| Human-BIC_HuRef     | TCAGAATAAATTCTGATAGAAAAGGCAGATACTGTTTCCACATATACAAGTATATGCTAA        | 8099 |
|                     | *****                                                               |      |
| Human-BIC_GRCh37.p5 | TTGCTTTTAGCAAACCTGATCCAAATAGGAATCAACATTATTCCATCTTAATGATTATGTT       | 8157 |
| Human-BIC_HuRef     | TTGCTTTTAGCAAACCTGATCCAAATAGGAATCAACATTATTCCATCTTAATGATTATGTT       | 8159 |
|                     | *****                                                               |      |
| Human-BIC_GRCh37.p5 | TTTGATTGGTACACATAAATGTTAAAGTGGGAAAATATGCAGAGAAAGTTACCTAAACTA        | 8217 |
| Human-BIC_HuRef     | TTTGATTGGTACACATAAATGTTAAAGTGGGAAAATATGCAGAGAAAGTTACCTAAACTA        | 8219 |
|                     | *****                                                               |      |
| Human-BIC_GRCh37.p5 | AATCACTTTAATTTTCAACAACATAATTACATTCCATTTACCTACTAAAATGGCTTTGG         | 8277 |
| Human-BIC_HuRef     | AATCACTTTAATTTTCAACAACATAATTACATTCCATTTACCTACTAAAATGGCTTTGG         | 8279 |
|                     | *****                                                               |      |
| Human-BIC_GRCh37.p5 | ACCTAGAATTTGTATTGCTACATCAATATAAGATGACTTTCAGTAAAAATAGATGTACAG        | 8337 |
| Human-BIC_HuRef     | ACCTAGAATTTGTATTGCTACATCAATATAAGATGACTTTCAGTAAAAATAGATGTACAG        | 8339 |
|                     | *****                                                               |      |



## Supplemental File2

|                     |                                                               |      |
|---------------------|---------------------------------------------------------------|------|
| Human-BIC_GRCh37.p5 | TTGATTTGTAACAACAAATTAATAGTTTTAAATTATTTGTATATTTCAAGGTAAATAAAA  | 8397 |
| Human-BIC_HuRef     | TTGATTTGTAACAACAAATTAATAGTTTTAAATTATTTGTATATTTCAAGGTAAATAAAA  | 8399 |
|                     | *****                                                         |      |
| Human-BIC_GRCh37.p5 | TTAGAGCTATCCCACAATCGCTTTGGTTATGAAATTCGACCACTGTAACCTTTTTTTAAAG | 8457 |
| Human-BIC_HuRef     | TTAGAGCTATCCCACAATCGCTTTGGTTATGAAATTCGACCACTGTAACCTTTTTTTAAAG | 8459 |
|                     | *****                                                         |      |
| Human-BIC_GRCh37.p5 | AAAACTTTATGGTGTGCAGTTCCTTTGGTATGCAAATATTAATGGTTGGTGCTGAGAAT   | 8517 |
| Human-BIC_HuRef     | AAAACTTTATGGTGTGCAGTTCCTTTGGTATGCAAATATTAATGGTTGGTGCTGAGAAT   | 8519 |
|                     | *****                                                         |      |
| Human-BIC_GRCh37.p5 | AAGCAGCAATATAGAAATATATATAATTGTAGAAGAATATAACCTATGATTTAGACATAA  | 8577 |
| Human-BIC_HuRef     | AAGCAGCAATATAGAAATATATATAATTGTAGAAGAATATAACCTATGATTTAGACATAA  | 8579 |
|                     | *****                                                         |      |
| Human-BIC_GRCh37.p5 | AATGAGATCCTTACAAGATAAAGAGTTATGGAGATGGATGATAATGATAGTTGTAGAACA  | 8637 |
| Human-BIC_HuRef     | AATGAGATCCTTACAAGATAAAGAGTTATGGAGATGGATGATAATGATAGTTGTAGAACA  | 8639 |
|                     | *****                                                         |      |
| Human-BIC_GRCh37.p5 | TTATGACTAAGTGTTTAAATATAGCGGACCTGTACACTTAAAAATGGTGAAGATGTTAAAC | 8697 |
| Human-BIC_HuRef     | TTATGACTAAGTGTTTAAATATAGCGGACCTGTACACTTAAAAATGGTGAAGATGTTAAAC | 8699 |
|                     | *****                                                         |      |
| Human-BIC_GRCh37.p5 | TTACATTATGTTTACATTACATATTTACCACAATAAAAAATTTTTGAAGGAAAACCAGA   | 8757 |
| Human-BIC_HuRef     | TTACATTATGTTTACATTACATATTTACCACAATAAAAAATTTTTGAAGGAAAACCAGA   | 8759 |
|                     | *****                                                         |      |
| Human-BIC_GRCh37.p5 | ACTTTAATGACAACTTAGGACATATTATGCTCTGAATATATAGTTTTGATAACGTCTTT   | 8817 |
| Human-BIC_HuRef     | ACTTTAATGACAACTTAGGACATATTATGCTCTGAATATATAGTTTTGATAACGTCTTT   | 8819 |
|                     | *****                                                         |      |
| Human-BIC_GRCh37.p5 | CCTGGCAAATCAACAAGGTAAGAATAAAAGGATATTCTGAAATCTTTTTTTTTCTTTGGA  | 8877 |
| Human-BIC_HuRef     | CCTGGCAAATCAACAAGGTAAGAATAAAAGGATATTCTGAAATCTTTTTTTTTCTTTGGA  | 8879 |
|                     | *****                                                         |      |
| Human-BIC_GRCh37.p5 | GACAGAGTCTTGCTCTGTTGCCAGGCTGGAGTGCAGTGGCACAATCTCGGCTCACTACT   | 8937 |
| Human-BIC_HuRef     | GACAGAGTCTTGCTCTGTTGCCAGGCTGGAGTGCAGTGGCACAATCTCGGCTCACTACT   | 8939 |
|                     | *****                                                         |      |

## Supplemental File2

|                     |                                                                |      |
|---------------------|----------------------------------------------------------------|------|
| Human-BIC_GRCh37.p5 | ACCTTCTGCCTCCCAGGTTCAAGTGATCCTCCTGCCTCAGCCTCCTGAGTAGCTGGGATT   | 8997 |
| Human-BIC_HuRef     | ACCTTCTGCCTCCCAGGTTCAAGTGATCCTCCTGCCTCAGCCTCCTGAGTAGCTGGGATT   | 8999 |
|                     | *****                                                          |      |
| Human-BIC_GRCh37.p5 | ATAGGCGTGCGCCACCACGCCTAGCTAATTTTTTTTGTATTTTTTAGTAGAGACGGGGTTTT | 9057 |
| Human-BIC_HuRef     | ATAGGCGTGCGCCACCACGCCTAGCTAATTTTTTTTGTATTTTTTAGTAGAGACGGGGTTTT | 9059 |
|                     | *****                                                          |      |
| Human-BIC_GRCh37.p5 | ACCATGTTGGTCACGCTGGTCTCAAACCTCTGACCTCATGATCCGCCACCTCGGCCTCC    | 9117 |
| Human-BIC_HuRef     | ACCATGTTGGTCACGCTGGTCTCAAACCTCTGACCTCATGATCCGCCACCTCGGCCTCC    | 9119 |
|                     | *****                                                          |      |
| Human-BIC_GRCh37.p5 | CAAAATGCTAGGATTACAGGCATGAGACACCACCCAGCCAGATATTCTTAAATCTTAT     | 9177 |
| Human-BIC_HuRef     | CAAAATGCTAGGATTACAGGCATGAGACACCCGACCCAGCCAGATATTCTTAAATCTTAT   | 9179 |
|                     | *****                                                          |      |
| Human-BIC_GRCh37.p5 | GCTCACACTCCACCCCCCAAAAAAATGTCTTTCAGGAAAGCATAAATTTAAGGAAAAA     | 9237 |
| Human-BIC_HuRef     | GCTCACACTCCACCCCCCAAAAAAATGTCTTTCAGGAAAGCATAAATTTAAGGAAAAA     | 9239 |
|                     | *****                                                          |      |
| Human-BIC_GRCh37.p5 | TTTCCCAAAGTGCCACCTTCAGCTTCATTCTTAGCACCAGAGGAAGAATTGCCTGTCATA   | 9297 |
| Human-BIC_HuRef     | TTTCCCAAAGTGCCACCTTCAGCTTCATTCTTAGCACCAGAGGAAGAATTGCCTGTCATA   | 9299 |
|                     | *****                                                          |      |
| Human-BIC_GRCh37.p5 | TAATGAAAGATCCTTGGTGTTATCATTAATCTAGTATACATAGTGCTTCCTCTTGGTAGA   | 9357 |
| Human-BIC_HuRef     | TAATGAAAGATCCTTGGTGTTATCATTAATCTAGTATACATAGTGCTTCCTCTTGGTAGA   | 9359 |
|                     | *****                                                          |      |
| Human-BIC_GRCh37.p5 | TTTTTACCTACTGTGAGAAGGAATGATTTTGATACTCAGACAGTGTGTAGTAATTTGTTA   | 9417 |
| Human-BIC_HuRef     | TTTTTACCTACTGTGAGAAGGAATGATTTTGATACTCAGACAGTGTGTAGTAATTTGTTA   | 9419 |
|                     | *****                                                          |      |
| Human-BIC_GRCh37.p5 | AGAACATTTAACTTGGAACTATGCTACACAGTAAAACCTTATACTGACAATGGATATTTT   | 9477 |
| Human-BIC_HuRef     | AGAACATTTAACTTGGAACTATGCTACACAGTAAAACCTTATACTGACAATGGATATTTT   | 9479 |
|                     | *****                                                          |      |
| Human-BIC_GRCh37.p5 | ATGTGGTAGGCCTAAGAAGTATTGTGGAGTGAGGGGACTGGAAGTATATCTGCAGAACTA   | 9537 |
| Human-BIC_HuRef     | ATGTGGTAGGCCTAAGAAGTATTGTGGAGTGAGGGGACTGGAAGTATATCTGCAGAACTA   | 9539 |
|                     | *****                                                          |      |

## Supplemental File2

|                     |                                                                       |       |
|---------------------|-----------------------------------------------------------------------|-------|
| Human-BIC_GRCh37.p5 | CCTAGTCAAAGACCCCAGTCTAATTTCTAATATATAATTCATATAAAATTACTCTTGCATT         | 9597  |
| Human-BIC_HuRef     | CCTAGTCAAAGACCCCAGTCTAATTTCTAATGTATAATTCATATAAAATTACTCTTGCATT         | 9599  |
|                     | *****                                                                 |       |
| Human-BIC_GRCh37.p5 | GCTATACATTAAACATTATGCTTGTGCACATTCTTACTTGGTTAGCACTGTCACTACTGAT         | 9657  |
| Human-BIC_HuRef     | GCTATACATTAAACATTATGCTTGTGCACATTCTTACTTGGTTAGCACTGTCACTACTGAT         | 9659  |
|                     | *****                                                                 |       |
| Human-BIC_GRCh37.p5 | TGTCAGGCCTATAAATTGTGTATAAATTCTTCCCCTGCCACTTTACCAGCTGGTGGCCACAC        | 9717  |
| Human-BIC_HuRef     | TGTCAGGCCTATAAATTGTGTATAAATTCTTCCCCTGCCACTTTACCAGCTGGTGGCCACAC        | 9719  |
|                     | *****                                                                 |       |
| Human-BIC_GRCh37.p5 | CGATTCCAGAAAGAACTACTTTATTTCTTATTACCTCATGAAAGCACCTCTGCCAGTG            | 9777  |
| Human-BIC_HuRef     | CGATTCCAGAAAGAACTACTTTATTTCTTATTACCTCATGAAAGCACCTCTGCCAGTG            | 9779  |
|                     | *****                                                                 |       |
| Human-BIC_GRCh37.p5 | CCTTGGCTAATAGACTGGCCTTTGTTGTCTATGACCACTAATTTCCCACTCAGGCATATAG         | 9837  |
| Human-BIC_HuRef     | CCTTGGCTAATAGACTGGCCTTTGTTGTCTATGACCACTAATTTCCCACTCAGGCATATAG         | 9839  |
|                     | *****                                                                 |       |
| Human-BIC_GRCh37.p5 | CAATTCTGTTGTTGGTTGCTTAGCCCAGTCAAAAACACTGGAAGTGGACATAGACTCCAC          | 9897  |
| Human-BIC_HuRef     | CAATTCTGTTGTTGGTTGCTTAGCCCAGTCAAAAACACTGGAAGTGGACATAGACTCCAC          | 9899  |
|                     | *****                                                                 |       |
| Human-BIC_GRCh37.p5 | ACTGATGAATGAATGACCTTCTAGTCATTCTAATGTCCTTAAAAGTCTACTATTTTTTAAA         | 9957  |
| Human-BIC_HuRef     | ACTGATGAATGAATGACCTTCTAGTCATTCTAATGTCCTTAAAAGTCTACTATTTTTTAAA         | 9959  |
|                     | *****                                                                 |       |
| Human-BIC_GRCh37.p5 | TTGTAGAATATATATATATATATATATATATATATTTTTTTTTTTTTTT-CTGGGATATTTCTCCTTT  | 10016 |
| Human-BIC_HuRef     | TTGTAGAATATATATATATATATATATATATATATATTTTTTTTTTTTTTTCTGGGATATTTCTCCTTT | 10019 |
|                     | *****                                                                 |       |
| Human-BIC_GRCh37.p5 | CTTCTGTTTCATTAATGTTTTTCATCTATCATTGTGTTTTAAATATGACCTAAGGTTCTAT         | 10076 |
| Human-BIC_HuRef     | CTTCTGTTTCATTAATGTTTTTCATCTATCATTGTGTTTTAAATATGACCTAAGGTTCTAT         | 10079 |
|                     | *****                                                                 |       |
| Human-BIC_GRCh37.p5 | AGTATATTTAGACAAACTTCTCATTCTCTGCAGTGTTTCGGAATTCATCATGCCTGTATG          | 10136 |
| Human-BIC_HuRef     | AGTATATTTAGACAAACTTCTCATTCTCTGCAGTGTTTCGGAATTCATCATGCCTGTATG          | 10139 |
|                     | *****                                                                 |       |

## Supplemental File2

|                     |                                                               |       |
|---------------------|---------------------------------------------------------------|-------|
| Human-BIC_GRCh37.p5 | ACAAGGTTGTGTTTGGAGAACAAAAGGGGACCTGTGTGACATGTTTTATTTCAATATACAT | 10196 |
| Human-BIC_HuRef     | ACAAGGTTGTGTTTGGAGAACAAAAGGGGACCTGTGTGACATGTTTTATTTCAATATACAT | 10199 |
|                     | *****                                                         |       |
| Human-BIC_GRCh37.p5 | TTAGAGTTTGAACAAATAAAAAAGCTATTAGAATTTTAAATATATATAACACATTATCA   | 10256 |
| Human-BIC_HuRef     | TTAGAGTTTGAACAAATAAAAAAGCTATTAGAATTTTAAATATATATAACACATTATCA   | 10259 |
|                     | *****                                                         |       |
| Human-BIC_GRCh37.p5 | AAAACTGTCACTTTTCTGAGTGCTCTAATCAGGCAATTCGTATGTATATTTAAAAAGA    | 10316 |
| Human-BIC_HuRef     | AAAACTGTCACTTTTCTGAGTGCTCTAATCAGGCAATTCGTATGTATATTTAAAAAGA    | 10319 |
|                     | *****                                                         |       |
| Human-BIC_GRCh37.p5 | GGGAAAAAGCTAATTAGTATACTAAATATATTTATTTTAAATACCTGTGCTCATATGTTAT | 10376 |
| Human-BIC_HuRef     | GGGAAAAAGCTAATTAGTATACTAAATATATTTATTTTAAATACCTGTGCTCATATGTTAT | 10379 |
|                     | *****                                                         |       |
| Human-BIC_GRCh37.p5 | CTTTAAAGAACAGGAATAAAAATTTATGGGTAGAATAGTATGCCAGCAATTTACCTTCAAT | 10436 |
| Human-BIC_HuRef     | CTTTAAAGAACAGGAATAAAAATTTATGGGTAGAATAGTATGCCAGCAATTTACCTTCAAT | 10439 |
|                     | *****                                                         |       |
| Human-BIC_GRCh37.p5 | ACAAATTAACACATCTTTTAAAGAAAAGGGCGAGTTATATTGGCTGGGGTGGCACTAACA  | 10496 |
| Human-BIC_HuRef     | ACAAATTAACACATCTTTTAAAGAAAAGGGCGAGTTATATTGGCTGGGGTGGCACTAACA  | 10499 |
|                     | *****                                                         |       |
| Human-BIC_GRCh37.p5 | CTACATTATTAATATGTATTTATTGAGCATTACTGTGTCCAGGACCCTGTAAGGGGGAA   | 10556 |
| Human-BIC_HuRef     | CTACATTATTAATATGTATTTATTGAGCATTACTGTGTCCAGGACCCTGTAAGGGGGAA   | 10559 |
|                     | *****                                                         |       |
| Human-BIC_GRCh37.p5 | AAAAAGTCCTTGTTTTTACAATCTTTATTGACTGAAATTCTGTAAAATGAATTGAATTCC  | 10616 |
| Human-BIC_HuRef     | AAAAAGTCCTTGTTTTTACAATCTTTATTGACTGAAATTCTGTAAAATGAATTGAATTCC  | 10619 |
|                     | *****                                                         |       |
| Human-BIC_GRCh37.p5 | TGAAGTGACATCATTTAACCCAAATTTTTTCATCATCAACTAATTCATCTCAGAAAACAG  | 10676 |
| Human-BIC_HuRef     | TGAAGTGACATCATTTAACCCAAATTTTTTCATCATCAACTAATTCATCTCAGAAAACAG  | 10679 |
|                     | *****                                                         |       |
| Human-BIC_GRCh37.p5 | TAAAGTTTAAAAAAAATACTATCAGTAAGAATAATATATTTCCCTTGTTGGAAATTTTC   | 10736 |
| Human-BIC_HuRef     | TAAAGTTTAAAAAAAATACTATCAGTAAGAATAATATATTTCCCTTGTTGGAAATTTTC   | 10739 |
|                     | *****                                                         |       |

## Supplemental File2

|                     |                                                               |       |
|---------------------|---------------------------------------------------------------|-------|
| Human-BIC_GRCh37.p5 | CAAACCACGATATTCTGCCCTGTCAAAATATATTTCACTGGGGAATTTTTTACTTCATACG | 10796 |
| Human-BIC_HuRef     | CAAACCACGATATTCTGCCCTGTCAAAATATATTTCACTGGGGAATTTTTTACTTCATACG | 10799 |
|                     | *****                                                         |       |
| Human-BIC_GRCh37.p5 | TTTCTTTTGAACCTTAGTCACATTTTTATATCTAGCTGGTTTCATTATTAAATAAAAGAAA | 10856 |
| Human-BIC_HuRef     | TTTCTTTTGAACCTTAGTCACATTTTTATATCTAGCTGGTTTCATTATTAAATAAAAGAAA | 10859 |
|                     | *****                                                         |       |
| Human-BIC_GRCh37.p5 | AGGTGATTCCCCTCTTGTACTGCAGGAGACCACATACTTGAATGATACTCTAACTTCTAG  | 10916 |
| Human-BIC_HuRef     | AGGTGATTCCCCTCTTGTACTGCAGGAGACCACATACTTGAATGATACTCTAACTTCTAG  | 10919 |
|                     | *****                                                         |       |
| Human-BIC_GRCh37.p5 | GTTCTGTTATAGTAACACTGAAATCAGAAACCTGTGGGAGAAATGTCACCTTATCTGAGA  | 10976 |
| Human-BIC_HuRef     | GTTCTGTTATAGTAACACTGAAATCAGAAACCTGTGGGAGAAATGTCACCTTATCTGAGA  | 10979 |
|                     | *****                                                         |       |
| Human-BIC_GRCh37.p5 | GAGTAAAAATCAGACTCTAAAAGGAAGTAGCAAATTCATCTTGTCTTTTTTTTTAATCAAC | 11036 |
| Human-BIC_HuRef     | GAGTAAAAATCAGACTCTAAAAGGAAGTAGCAAATTCATCTTGTCTTTTTTTTTAATCAAC | 11039 |
|                     | *****                                                         |       |
| Human-BIC_GRCh37.p5 | CCTCTGCCTAAGACAAGTAGTTTGAACACAGAGGACTCTTTAAGTCATACTTCCTTTAT   | 11096 |
| Human-BIC_HuRef     | CCTCTGCCTAAGACAAGTAGTTTGAACACAGAGGACTCTTTAAGTCATACTTCCTTTAT   | 11099 |
|                     | *****                                                         |       |
| Human-BIC_GRCh37.p5 | GTAGTCAAACCAAAGCCACTGGGTAGTGCTTTCCCCAAAGGAATCTCTAAATAGTAGAC   | 11156 |
| Human-BIC_HuRef     | GTAGTCAAACCAAAGCCACTGGGTAGTGCTTTCCCCAAAGGAATCTCTAAATAGTAGAC   | 11159 |
|                     | *****                                                         |       |
| Human-BIC_GRCh37.p5 | GGGGACATTTTCAGATAGATTTCGTTTGTAGGCAAACCTCCATTGCTTGTATCACATTTCC | 11216 |
| Human-BIC_HuRef     | GGGGACATTTTCAGATAGATTTCGTTTGTAGGCAAACCTCCATTGCTTGTATCACATTTCC | 11219 |
|                     | *****                                                         |       |
| Human-BIC_GRCh37.p5 | TGAAAGAATAAAGGTAAAACCTTCAACTATGTATTACAGAAAGAAAAATTCAGCCTGAACC | 11276 |
| Human-BIC_HuRef     | TGAAAGAATAAAGGTAAAACCTTCAACTATGTATTACAGAAAGAAAAATTCAGCCTGAACC | 11279 |
|                     | *****                                                         |       |
| Human-BIC_GRCh37.p5 | CTACCCTTATAAAAACAGGTTAATTGGGTTTTAATTTTCATAAATCATAAAGGACTATTTT | 11336 |
| Human-BIC_HuRef     | CTACCCTTATAAAAACAGGTTAATTGGGTTTTAATTTTCATAAATCATAAAGGACTATTTT | 11339 |
|                     | *****                                                         |       |

## Supplemental File2

|                     |                                                                       |       |
|---------------------|-----------------------------------------------------------------------|-------|
| Human-BIC_GRCh37.p5 | GAACATTTGGGCCTTTAATTGTCTAGCTCCTAGATGAAGTACAAATCAGAAAAAAAAAAAAA        | 11396 |
| Human-BIC_HuRef     | GAACATTTGGGCCTTTAATTGTCTAGCTCCTAGATGAAGTACAAATCAG-AAAAAAAAAAAA        | 11398 |
|                     | *****                                                                 |       |
| Human-BIC_GRCh37.p5 | ACTGTACTGTGTCAGAATGCAAGCTTTCCTCTTTGCATTTTGGCATTGAAAACCTCCGAA          | 11456 |
| Human-BIC_HuRef     | ACTGTACTGTGTCAGAATGCAAGCTTTCCTCTTTGCATTTTGGCATTGAAAACCTCCGAA          | 11458 |
|                     | *****                                                                 |       |
| Human-BIC_GRCh37.p5 | GAGCGGTTTTTGTTTTTTATTTAAAGAAGATGATACATATGTGTACCCGATTCAAACTA           | 11516 |
| Human-BIC_HuRef     | GAGCGGTTTTTGTTTTTTATTTAAAGAAGATGATACATATGTGTACCCGATTCAAACTA           | 11518 |
|                     | *****                                                                 |       |
| Human-BIC_GRCh37.p5 | GAGAATAGAATTTAAAACATAATTTTCAAAGTCTTCAAATATGCCTAAAGGTAACAATGT          | 11576 |
| Human-BIC_HuRef     | GAGAATAGAATTTAAAACATAATTTTCAAAGTCTTCAAATATGCCTAAAGGTAACAATGT          | 11578 |
|                     | *****                                                                 |       |
| Human-BIC_GRCh37.p5 | CATCTTTTAATTGCCAATTTCTCTACCACCTTTCAAAAAATTACTTCCAAGGATTTAATGA         | 11636 |
| Human-BIC_HuRef     | CATCTTTTAATTGCCAATTTCTCTACCACCTTTCAAAAAATTACTTCCAAGGATTTAATGA         | 11638 |
|                     | *****                                                                 |       |
| Human-BIC_GRCh37.p5 | GCTCCTTCCTTTCAACAGAAAATGGACTATTTTCCTTTTCAGATTTACTATATGCTGTCAC         | 11696 |
| Human-BIC_HuRef     | GCTCCTTCCTTTCAACAGAAAATGGACTATTTTCCTTTTCAGATTTACTATATGCTGTCAC         | 11698 |
|                     | *****                                                                 |       |
| Human-BIC_GRCh37.p5 | TCCAGCTTTATAACCGCATGTGCATACACAAACATTTCTTTCTCTCTTGCAG <b>GTGGCACA</b>  | 11756 |
| Human-BIC_HuRef     | TCCAGCTTTATAACCGCATGTGCATACACAAACATTTCTTTCTCTCTTGCAG <b>GTGGCACA</b>  | 11758 |
|                     | *****                                                                 |       |
| Human-BIC_GRCh37.p5 | <b>AACCAGGAAGGGGAAATCTGTGGTTTTAAATTTCTTTATGCCTCATCCTCTGAGTGCTGAAG</b> | 11816 |
| Human-BIC_HuRef     | <b>AACCAGGAAGGGGAAATCTGTGGTTTTAAATTTCTTTATGCCTCATCCTCTGAGTGCTGAAG</b> | 11818 |
|                     | *****                                                                 |       |
| Human-BIC_GRCh37.p5 | <b>GCTTGCTGTAGGCTGTATGCTGTTAATGCTAATCGTGATAGGGGTTTTTGCTCCAAGT</b>     | 11876 |
| Human-BIC_HuRef     | <b>GCTTGCTGTAGGCTGTATGCTGTTAATGCTAATCGTGATAGGGGTTTTTGCTCCAAGT</b>     | 11878 |
|                     | *****                                                                 |       |
| Human-BIC_GRCh37.p5 | <b>ACTCCTACATATTAGCATTAAACAGTGTATGATGCCTGTTACTAGCATTACATGGAACAA</b>   | 11936 |
| Human-BIC_HuRef     | <b>ACTCCTACATATTAGCATTAAACAGTGTATGATGCCTGTTACTAGCATTACATGGAACAA</b>   | 11938 |
|                     | *****                                                                 |       |

## Supplemental File2

|                     |                                                               |       |
|---------------------|---------------------------------------------------------------|-------|
| Human-BIC_GRCh37.p5 | ATTGCTGCCGTGGGAGGATGACAAAGAAGCATGAGTCACCCTGCTGGATAAACTTAGACT  | 11996 |
| Human-BIC_HuRef     | ATTGCTGCCGTGGGAGGATGACAAAGAAGCATGAGTCACCCTGCTGGATAAACTTAGACT  | 11998 |
|                     | *****                                                         |       |
| Human-BIC_GRCh37.p5 | TCAGGCTTTATCATTNTTCAATCTGTTAATCATAATCTGGTCACTGGGATGTTCAACCTT  | 12056 |
| Human-BIC_HuRef     | TCAGGCTTTATCATTNTTCAATCTGTTAATCATAATCTGGTCACTGGGATGTTCAACCTT  | 12058 |
|                     | *****                                                         |       |
| Human-BIC_GRCh37.p5 | AAACTAAGTTTTGAAAGTAAGGTTATTTAAAAGATTTATCAGTAGTATCCTAAATGCAA   | 12116 |
| Human-BIC_HuRef     | AAACTAAGTTTTGAAAGTAAGGTTATTTAAAAGATTTATCAGTAGTATCCTAAATGCAA   | 12118 |
|                     | *****                                                         |       |
| Human-BIC_GRCh37.p5 | CATTTTCATTTAAATGTCAAGCCCATGTTTGTTTTTATCATTAAACAGAAAATATATTCAT | 12176 |
| Human-BIC_HuRef     | CATTTTCATTTAAATGTCAAGCCCATGTTTGTTTTTATCATTAAACAGAAAATATATTCAT | 12178 |
|                     | *****                                                         |       |
| Human-BIC_GRCh37.p5 | GTCATTCTTAATTGCAGGTTTTGGCTTGTTCAATATAATGTTCAATAACACCTTTGATTC  | 12236 |
| Human-BIC_HuRef     | GTCATTCTTAATTGCAGGTTTTGGCTTGTTCAATATAATGTTCAATAACACCTTTGATTC  | 12238 |
|                     | *****                                                         |       |
| Human-BIC_GRCh37.p5 | AACTGTTAGAAATGTGGGCTAAACACAAATTTCTATAATATTTTTGTAGTTAAAAATTAG  | 12296 |
| Human-BIC_HuRef     | AACTGTTAGAAATGTGGGCTAAACACAAATTTCTATAATATTTTTGTAGTTAAAAATTAG  | 12298 |
|                     | *****                                                         |       |
| Human-BIC_GRCh37.p5 | AAGGACTACTAACCTCCAGTTATATCATGGATTGTCTGGCAACGTTTTTTAAAAGATTTA  | 12356 |
| Human-BIC_HuRef     | AAGGACTACTAACCTCCAGTTATATCATGGATTGTCTGGCAACGTTTTTTAAAAGATTTA  | 12358 |
|                     | *****                                                         |       |
| Human-BIC_GRCh37.p5 | GAAACTGGTACTTTCCCCAGGTAACGATTTTCTGTTCAAGCAACTTCAGTTTAAAATTA   | 12416 |
| Human-BIC_HuRef     | GAAACTGGTACTTTCCCCAGGTAACGATTTTCTGTTCAAGCAACTTCAGTTTAAAATTA   | 12418 |
|                     | *****                                                         |       |
| Human-BIC_GRCh37.p5 | ATACTTTTATTTGACTCTTAAAGGGAAACTGAAAGGCTATGAAGCTGAATTTTTTTAATG  | 12476 |
| Human-BIC_HuRef     | ATACTTTTATTTGACTCTTAAAGGGAAACTGAAAGGCTATGAAGCTGAATTTTTTTAATG  | 12478 |
|                     | *****                                                         |       |
| Human-BIC_GRCh37.p5 | AAATATTTTTAACAGTTAGCAGGGTAAATAACATCTGACAGCTAATGAGATATTTTTTCC  | 12536 |
| Human-BIC_HuRef     | AAATATTTTTAACAGTTAGCAGGGTAAATAACATCTGACAGCTAATGAGATATTTTTTCC  | 12538 |
|                     | *****                                                         |       |

## Supplemental File2

|                     |                                                               |       |
|---------------------|---------------------------------------------------------------|-------|
| Human-BIC_GRCh37.p5 | ATACAAGATAAAAAGATTTAATCAAAAAATTTTCATATTTGAAATGAAGTCCCAAATCTAG | 12596 |
| Human-BIC_HuRef     | ATACAAGATAAAAAGATTTAATCAAAAAATTTTCATATTTGAAATGAAGTCCCAAATCTAG | 12598 |
|                     | *****                                                         |       |
| Human-BIC_GRCh37.p5 | GTTCAAGTTCAATAGCTTAGCCACATAATACGGTTGTGCGAGCAGAGAATCTACCTTTCC  | 12656 |
| Human-BIC_HuRef     | GTTCAAGTTCAATAGCTTAGCCACATAATACGGTTGTGCGAGCAGAGAATCTACCTTTCC  | 12658 |
|                     | *****                                                         |       |
| Human-BIC_GRCh37.p5 | ACTTCTAAGCCTGTTTCTTCCTCCAT--ATGGGGATAATACTTTACAAGGTTGTTGTGA   | 12713 |
| Human-BIC_HuRef     | ACTTCTAAGCCTGTTTCTTCCTCCATAAAATGGGGATAATACTTTACAAGGTTGTTGTGA  | 12718 |
|                     | *****                                                         |       |
| Human-BIC_GRCh37.p5 | GGCTTAGATGAGATAGAGAATTATTCCATAAGATAATCAAGTGCTACATTAATGTTATAG  | 12773 |
| Human-BIC_HuRef     | GGCTTAGATGAGATAGAGAATTATTCCATAAGATAATCAAGTGCTACATTAATGTTATAG  | 12778 |
|                     | *****                                                         |       |
| Human-BIC_GRCh37.p5 | TTAGATTAATCCAAGAACTAGTCACCCTACTTTATTAGAGAAGAGAAAAGCTAATGATTT  | 12833 |
| Human-BIC_HuRef     | TTAGATTAATCCAAGAACTAGTCACCCTACTTTATTAGAGAAGAGAAAAGCTAATGATTT  | 12838 |
|                     | *****                                                         |       |
| Human-BIC_GRCh37.p5 | GATTTGCAGAATATTTAAGGTTTGGATTTCTATGCAGTTTTTCTAAATAACCATCACTTA  | 12893 |
| Human-BIC_HuRef     | GATTTGCAGAATATTTAAGGTTTGGATTTCTATGCAGTTTTTCTAAATAACCATCACTTA  | 12898 |
|                     | *****                                                         |       |
| Human-BIC_GRCh37.p5 | CAAATATGTAACCAAACGTAATTGTTAGTATATTTAATGTAAACTTGTTTTAACAACCTCT | 12953 |
| Human-BIC_HuRef     | CAAATATGTAACCAAACGTAATTGTTAGTATATTTAATGTAAACTTGTTTTAACAACCTCT | 12958 |
|                     | *****                                                         |       |
| Human-BIC_GRCh37.p5 | TCTCAACATTTTGTCCAGGTTATTCACTGTAACCAAATAAATCTCATGAGTCTTTAGTTG  | 13013 |
| Human-BIC_HuRef     | TCTCAACATTTTGTCCAGGTTATTCACTGTAACCAAATAAATCTCATGAGTCTTTAGTTG  | 13018 |
|                     | *****                                                         |       |
| Human-BIC_GRCh37.p5 | ATTTAAAATAA                                                   | 13024 |
| Human-BIC_HuRef     | ATTTAAAATAA                                                   | 13029 |
|                     | *****                                                         |       |



# Supplemental File3

## Mouse *Bic* gene (reference assembly) aligned against the alternate assembly.

```
Mouse-BIC_GRCm38          ACTTTCCTCATGAAACCAGCTCATCTGAGAAAAACAGCAAAGTTTAAAAAA 50
Mouse-BIC_Mm_Celera      ACTTTCCTCATGAAACCAGCTCATCTGAGAAAAACAGCAAAGTTTAAAAAA 50
*****

Mouse-BIC_GRCm38          GAAATACTATCAGTAAGTATGATATATTTCCCTTGGTTTGAAATTTCCAA 100
Mouse-BIC_Mm_Celera      GAAATACTATCAGTAAGTATGATATATTTCCCTTGGTTTGAAATTTCCAA 100
*****

Mouse-BIC_GRCm38          GCCACGATATTTCTGCCCTGTCAAAAATATATTTCACTGGGGAAATTTTAACT 150
Mouse-BIC_Mm_Celera      GCCACGATATTTCTGCCCTGTCAAAAATATATTTCACTGGGGAAATTTTAACT 150
*****

Mouse-BIC_GRCm38          TGATGCATTTCTTTTGAACCTAATCACATTTCTACATCTAGCTGGTTTCA 200
Mouse-BIC_Mm_Celera      TGATGCATTTCTTTTGAACCTAATCACATTTCTACATCTAGCTGGTTTCA 200
*****

Mouse-BIC_GRCm38          TTATTTAAAGAAAAGAAAAGGTGGTTCCCTCTGGTCCATAAGGGAACCAC 250
Mouse-BIC_Mm_Celera      TTATTTAAAGAAAAGAAAAGGTGGTTCCCTCTGGTCCATAAGGGAACCAC 250
*****

Mouse-BIC_GRCm38          AGACTTGAGTGATGCTTGAACCTTCTAGGTTTCGCGTACAGTAACACTGAAA 300
Mouse-BIC_Mm_Celera      AGACTTGAGTGATGCTTGAACCTTCTAGGTTTCGCGTACAGTAACACTGAAA 300
*****

Mouse-BIC_GRCm38          CCAGAACTTGTGGGAGAAATGTCACCTTTATCTGAGAGAGTAAAATCCAA 350
Mouse-BIC_Mm_Celera      CCAGAACTTGTGGGAGAAATGTCACCTTTATCTGAGAGAGTAAAATCCAA 350
*****

Mouse-BIC_GRCm38          CTCTAACAGGAAAACAGCAAATTCATCTTTTTTCTTTTTCTAAACCACTCT 400
Mouse-BIC_Mm_Celera      CTCTAACAGGAAAACAGCAAATTCATCTTTTTTCTTTTTCTAAACCACTCT 400
*****

Mouse-BIC_GRCm38          GCTGGAGACAAGTCCCTTGAGTCAGAGCTCTTTAAGGCGCACTTCCTTTA 450
Mouse-BIC_Mm_Celera      GCTGGAGACAAGTCCCTTGAGTCAGAGCTCTTTAAGGCGCACTTCCTTTA 450
*****

Mouse-BIC_GRCm38          CATGGGTCAAACCTGAAGCCACCGGTTTGTGAGTCCCCAAAAGGAATCACTG 500
Mouse-BIC_Mm_Celera      CATGGGTCAAACCTGAAGCCACCGGTTTGTGAGTCCCCAAAAGGAATCACTG 500
*****
```

# Supplemental File3

```
Mouse-BIC_GRCm38      GAGGACAACAGGAGCATTTTCAGATACCTTTTCAGGGCAGACCTGCCCTGG 550
Mouse-BIC_Mm_Celera   GAGGACAACAGGAGCATTTTCAGATACCTTTTCAGGGCAGACCTGCCCTGG 550
*****

Mouse-BIC_GRCm38      CTGTACCCCCTATCTTTGAAGAAAAAGAAAAACGAATAAGGTGAAAAATCGC 600
Mouse-BIC_Mm_Celera   CTGTACCCCCTATCTTTGAAGAAAAAGAAAAACGAATAAGGTGAAAAATCGC 600
*****

Mouse-BIC_GRCm38      AACTACTATTTATAGAATCAAAATGGGTTTCATCCATTGAGTTTTAACTTT 650
Mouse-BIC_Mm_Celera   AACTACTATTTATAGAATCAAAATGGGTTTCATCCATTGAGTTTTAACTTT 650
*****

Mouse-BIC_GRCm38      CAAAAATCATAAAGTACCATCCTAAATATCTGAGATTTCTTGAATTGCCT 700
Mouse-BIC_Mm_Celera   CAAAAATCATAAAGTACCATCCTAAATATCTGAGATTTCTTGAATTGCCT 700
*****

Mouse-BIC_GRCm38      AGTGACCTGTGGGATGTACGTCAGAATATTACCCAGAAGTGAAGTTGTGT 750
Mouse-BIC_Mm_Celera   AGTGACCTGTGGGATGTACGTCAGAATATTACCCAGAAGTGAAGTTGTGT 750
*****

Mouse-BIC_GRCm38      CCTTTGAACTTCAGCATTTGTAGAACTATGAACCGTGGCTGTGTTAAAAAT 800
Mouse-BIC_Mm_Celera   CCTTTGAACTTCAGCATTTGTAGAACTATGAACCGTGGCTGTGTTAAAAAT 800
*****

Mouse-BIC_GRCm38      GATACATGTATTTCAAATATTTCCACAGAATTTAAAGTTTGATTTTATAAT 850
Mouse-BIC_Mm_Celera   GATACATGTATTTCAAATATTTCCACAGAATTTAAAGTTTGATTTTATAAT 850
*****

Mouse-BIC_GRCm38      TAGTTTTTTAAATTTGCAAACCTTACAAAAATTTTCCAAAAATTTACTTTAGAA 900
Mouse-BIC_Mm_Celera   TAGTTTTTTAAATTTGCAAACCTTACAAAAATTTTCCAAAAATTTACTTTAGAA 900
*****

Mouse-BIC_GRCm38      GCATTTTCAGAGCTCTTTTCTTTCAAAGCTGAAGTCTACCTTGCCTTCAGA 950
Mouse-BIC_Mm_Celera   GCATTTTCAGAGCTCTTTTCTTTCAAAGCTGAAGTCTACCTTGCCTTCAGA 950
*****

Mouse-BIC_GRCm38      TTCATAATCGTTCACTCTACTTTTATAACTAACTGTGTGCGTACACACAAC 1000
Mouse-BIC_Mm_Celera   TTCATAATCGTTCACTCTACTTTTATAACTAACTGTGTGCGTACACACAAC 1000
*****
```

# Supplemental File3

|                     |                                                            |      |
|---------------------|------------------------------------------------------------|------|
| Mouse-BIC_GRCm38    | TATTTCTTTTTCTCTTTCAG <b>GTGCTGCAAACCAGGAAGGGGAAGTGTGT</b>  | 1050 |
| Mouse-BIC_Mm_Celera | TATTTCTTTTTCTCTTTCAG <b>GTGCTGCAAACCAGGAAGGGGAAGTGTGT</b>  | 1050 |
|                     | *****                                                      |      |
| Mouse-BIC_GRCm38    | <b>GGTTTAAAGTTGCATATCCCTTATCCTCTGGCTGCTGGAGGCTTGCTGAAG</b> | 1100 |
| Mouse-BIC_Mm_Celera | <b>GGTTTAAAGTTGCATATCCCTTATCCTCTGGCTGCTGGAGGCTTGCTGAAG</b> | 1100 |
|                     | *****                                                      |      |
| Mouse-BIC_GRCm38    | <b>GCTGTATGCTGTTAATGCTAATTGTGATAGGGGTTTGGCCTCTGACTGA</b>   | 1150 |
| Mouse-BIC_Mm_Celera | <b>GCTGTATGCTGTTAATGCTAATTGTGATAGGGGTTTGGCCTCTGACTGA</b>   | 1150 |
|                     | *****                                                      |      |
| Mouse-BIC_GRCm38    | <b>CTCCTACCTGTTAGCATTAACAGGACACAAGGCCTGTTACTAGCACTCAC</b>  | 1200 |
| Mouse-BIC_Mm_Celera | <b>CTCCTACCTGTTAGCATTAACAGGACACAAGGCCTGTTACTAGCACTCAC</b>  | 1200 |
|                     | *****                                                      |      |
| Mouse-BIC_GRCm38    | <b>ATGGAACAAATGGCCACCGTGGGAGGATGACAAGTCCAAGAGTCACCCTG</b>  | 1250 |
| Mouse-BIC_Mm_Celera | <b>ATGGAACAAATGGCCACCGTGGGAGGATGACAAGTCCAAGAGTCACCCTG</b>  | 1250 |
|                     | *****                                                      |      |
| Mouse-BIC_GRCm38    | <b>CTGGATGAACGTAGATGTCAGACTCTATCATTTAATGTGCTAGTCATAAC</b>  | 1300 |
| Mouse-BIC_Mm_Celera | <b>CTGGATGAACGTAGATGTCAGACTCTATCATTTAATGTGCTAGTCATAAC</b>  | 1300 |
|                     | *****                                                      |      |
| Mouse-BIC_GRCm38    | <b>CTGGTTACTAGGATAGTCCACTGTAAGTGTACGATAAATGTCATTTAAA</b>   | 1350 |
| Mouse-BIC_Mm_Celera | <b>CTGGTTACTAGGATAGTCCACTGTAAGTGTACGATAAATGTCATTTAAA</b>   | 1350 |
|                     | *****                                                      |      |
| Mouse-BIC_GRCm38    | <b>AGATAGATCAGCAGTATCCTAAACAACATCTCAACTTCAAGCCCACATGT</b>  | 1400 |
| Mouse-BIC_Mm_Celera | <b>AGATAGATCAGCAGTATCCTAAACAACATCTCAACTTCAAGCCCACATGT</b>  | 1400 |
|                     | *****                                                      |      |
| Mouse-BIC_GRCm38    | <b>TTATTTTTTATCTTGAATGGAAAAGTGAAAAGTGTATCATTTTTATTTCAA</b> | 1450 |
| Mouse-BIC_Mm_Celera | <b>TTATTTTTTATCTTGAATGGAAAAGTGAAAAGTGTATCATTTTTATTTCAA</b> | 1450 |
|                     | *****                                                      |      |
| Mouse-BIC_GRCm38    | <b>AATTATGTTTATAACCATCTTCAATGATTCAACCAGAATACAAAATGAAT</b>  | 1500 |
| Mouse-BIC_Mm_Celera | <b>AATTATGTTTATAACCATCTTCAATGATTCAACCAGAATACAAAATGAAT</b>  | 1500 |
|                     | *****                                                      |      |

# Supplemental File3

|                     |                                                            |      |
|---------------------|------------------------------------------------------------|------|
| Mouse-BIC_GRCm38    | <b>GCACTAAAAAGGACATTTCTATATTTCTGTAGTTAAAATT CAGGACGGCC</b> | 1550 |
| Mouse-BIC_Mm_Celera | <b>GCACTAAAAAGGACATTTCTATATTTCTGTAGTTAAAATT CAGGACGGCC</b> | 1550 |
|                     | *****                                                      |      |
| Mouse-BIC_GRCm38    | <b>ATTCTCGACTGACATCTAGGATTGTCTGGAATACCTCTTGTAAGACTTGG</b>  | 1600 |
| Mouse-BIC_Mm_Celera | <b>ATTCTCGACTGACATCTAGGATTGTCTGGAATACCTCTTGTAAGACTTGG</b>  | 1600 |
|                     | *****                                                      |      |
| Mouse-BIC_GRCm38    | <b>AATTGGCATTFTTTTCCACATTACAATGTATTAGTCAACTTTGATTTAAAA</b> | 1650 |
| Mouse-BIC_Mm_Celera | <b>AATTGGCATTFTTTTCCACATTACAATGTATTAGTCAACTTTGATTTAAAA</b> | 1650 |
|                     | *****                                                      |      |
| Mouse-BIC_GRCm38    | <b>TTTGTAACTCTTGTGTTTTAGTGTAAAGGAAAAATTTAGGGTTAGTGTTAG</b> | 1700 |
| Mouse-BIC_Mm_Celera | <b>TTTGTAACTCTTGTGTTTTAGTGTAAAGGAAAAATTTAGGGTTAGTGTTAG</b> | 1700 |
|                     | *****                                                      |      |
| Mouse-BIC_GRCm38    | <b>AGTTTAGGGCTAGGTAAGGAAAAACTGAGTCAACACTGAATGATTTTTTTT</b> | 1750 |
| Mouse-BIC_Mm_Celera | <b>AGTTTAGGGCTAGGTAAGGAAAAACTGAGTCAACACTGAATGATTTTTTTT</b> | 1750 |
|                     | *****                                                      |      |
| Mouse-BIC_GRCm38    | <b>AAAATCTATGAGCCAGCTGTTGGTAGTTTACTCCTTTAATCCCAGCACTC</b>  | 1800 |
| Mouse-BIC_Mm_Celera | <b>AAAATCTATGAGCCAGCTGTTGGTAGTTTACTCCTTTAATCCCAGCACTC</b>  | 1800 |
|                     | *****                                                      |      |
| Mouse-BIC_GRCm38    | <b>GGGAGGCAGAGACAGGCAGATGGCTGAGTCGAAGGCCAACCTGGTCTACA</b>  | 1850 |
| Mouse-BIC_Mm_Celera | <b>GGGAGGCAGAGACAGGCAGATGGCTGAGTCGAAGGCCAACCTGGTCTACA</b>  | 1850 |
|                     | *****                                                      |      |
| Mouse-BIC_GRCm38    | <b>GAGTGAGCTCCAGGACAGCCTTAGCTACACAGAAAAATGCCTTATCAAAA</b>  | 1900 |
| Mouse-BIC_Mm_Celera | <b>GAGTGAGCTCCAGGACAGCCTTAGCTACACAGAAAAATGCCTTATCAAAA</b>  | 1900 |
|                     | *****                                                      |      |
| Mouse-BIC_GRCm38    | <b>AATTAAGAAAAATAAGATGAAGTATTAAAAAGTGACATGACAAATCATTCC</b> | 1950 |
| Mouse-BIC_Mm_Celera | <b>AATTAAGAAAAATAAGATGAAGTATTAAAAAGTGACATGACAAATCATTCC</b> | 1950 |
|                     | *****                                                      |      |
| Mouse-BIC_GRCm38    | <b>TGAGGGCTACCTATATATTTCTCACACGGTATAAAATATTTAATTTAATTA</b> | 2000 |
| Mouse-BIC_Mm_Celera | <b>TGAGGGCTACCTATATATTTCTCACACGGTATAAAATATTTAATTTAATTA</b> | 2000 |
|                     | *****                                                      |      |

# Supplemental File3

```
Mouse-BIC_GRCm38      ATATTTAATTTCAAATATTCACATTTGAAATGAAACCCAAATCTGGGTTC 2050
Mouse-BIC_Mm_Celera   ATATTTAATTTCAAATATTCACATTTGAAATGAAACCCAAATCTGGGTTC 2050
*****

Mouse-BIC_GRCm38      AAGCTTACTGCTTTAGCTGCACAGTAAAGCTGTGTAGTAAGGAGACCCAC 2100
Mouse-BIC_Mm_Celera   AAGCTTACTGCTTTAGCTGCACAGTAAAGCTGTGTAGTAAGGAGACCCAC 2100
*****

Mouse-BIC_GRCm38      GTTTCCTACGCATTTCTTCATGAATGCGGATGAACTTTACAAGGTTGGT 2150
Mouse-BIC_Mm_Celera   GTTTCCTACGCATTTCTTCATGAATGCGGATGAACTTTACAAGGTTGGT 2150
*****

Mouse-BIC_GRCm38      GTGCAGCTCACTGGAGATGAACAACCTTTTGTAAAGGTAATAAAAATCCCAC 2200
Mouse-BIC_Mm_Celera   GTGCAGCTCACTGGAGATGAACAACCTTTTGTAAAGGTAATAAAAATCCCAC 2200
*****

Mouse-BIC_GRCm38      AGTGATGTCTTAAA 2214
Mouse-BIC_Mm_Celera   AGTGATGTCTTAAA 2214
*****
```

# Supplemental File4

## Mouse *Bic* gene (reference assembly) aligned against the rat alternate genome.

```
Mouse-BIC_GRCm38      ACTTTC-CTCATGAAACCAGCTCATCTGAGAAAAACAGCAAAGTTTAAAAAAGAAATACTA 59
Rn_Celera             ACTGTAACTCATGAAACCAACTCATCTGAGAAAAACAGCAAAGTTTAAAAAA-AAATACTA 59
                      *** * *****
Mouse-BIC_GRCm38      TCAGTAAGTATGATATATTTTCCTTGGTTTGGAAATTTCCAAGCCACGATATTCCTGCCCTG 119
Rn_Celera             TCAGTAAGTATGATATATTTTCCTTGGTTTGGAAATTTCCAAGCCACGATATTCCTGCCCTG 119
                      *****
Mouse-BIC_GRCm38      TCAAAATATATTCACCTGGGGAATTTTAACTTGATGCATTTCTTTTGAACCTTAATCACAT 179
Rn_Celera             TCAAAATATATTCACCTGGGGAATTTTAACTTGATGCATTTCTTTTGAACCTTAATCACAT 179
                      *****
Mouse-BIC_GRCm38      TTCTACATCTAGCTGGTTTCATTATTAAGAAAAAGAAAGGTGGTTCCCTCTGGTCCTA 239
Rn_Celera             TTTTACATCTAGCAGGTTTCATTATTAATAAAAAGAAAGGTGGTTCCCTCTGGTCCTA 239
                      ** *****
Mouse-BIC_GRCm38      AAGGGAACCACAGACTTGGAGTGATGCTTGAACCTTCTAGGTTTCGCGTACAGTAACACTGAA 299
Rn_Celera             AAGGGAACCACAGACTTAAATGATGCTTGAACCTTCTAGGTTTCGCGTACAGTAACACCGAA 299
                      ***** * *****
Mouse-BIC_GRCm38      ACCAGAAACTTGTGGGAGAAAATGTCACCTTTATCTGAGAGAGTAAAAATCCAACCTAACAG 359
Rn_Celera             ACCAGAAACTTGTGGGAGAAAATGTCACCTTTATCTGAGAGAGTAAAAATCCAACCTAACAG 359
                      *****
Mouse-BIC_GRCm38      GAAACAGCAAATTCATCTTTTCTTTTCTTAAACCACTCT--GCTGGAGACAAGTCCCT 417
Rn_Celera             GAAGCAGCAAATTCATCTTT---CTTTTCTTAAACCACTCTTTGCTGGAGACAAGTCACT 416
                      *** ***** **
Mouse-BIC_GRCm38      TGAGTCAGAGCTCTTTAAGGCGCACTTCCTTTACATGGGTCAAACCTGAAGCCACCGGTTT 477
Rn_Celera             TGAGTCAGTGCTCTTTAAGGCACACTTCCTGCACATGGGTCAAACCGAAGCCACTGGTTT 476
                      *****
Mouse-BIC_GRCm38      GTGAGTCCCCAAGGAATCACTGGAGGACAACAGGAGCATTTTCAGATACCTTTCAGGGC 537
Rn_Celera             GTGCGTCCCCAAAAGGAATCCCTGAAGGGCAAGGGGAACATTTTCAGAGACATTTTCAGGGC 536
                      *** ***** ** * * * * *
Mouse-BIC_GRCm38      AGACCTGCCCTGGCTGTACCCCTATCTTGAAGAAAAAAGAAAAACGAATAAGGTGAAAAAT 597
Rn_Celera             AGACCTGTACTGGCCATATCACGTCCTTGAA-AAAAAATAAATAAATAAGGTGAAAAGC 595
                      ***** * * * * *
```



# Supplemental File4

|                  |                                                                        |      |
|------------------|------------------------------------------------------------------------|------|
| Mouse-BIC_GRCm38 | <u>GAAGGCTGTATGCTGTTAATGCTAATTGTGATAGGGGTTTTGGCCTCTGACTGACTCCTA</u>    | 1156 |
| Rn_Celera        | <u>GAAGGCTGTATGCTGTTAATGCTAATTGTGATAGGGGTTTTGGCCTCTGACTGACTCCTA</u>    | 1241 |
|                  | *****                                                                  |      |
| Mouse-BIC_GRCm38 | <u>CCTGTTAGCATTAAACAGGACACAAGGCCTGTTACTAGCACTCACATGGAACAAATGGCCA</u>   | 1216 |
| Rn_Celera        | <u>CCTGTTAGCATTAAACAGGATACAGTGCCTGTTACTAGCATTACCGTGAACAAATGGCCG</u>    | 1301 |
|                  | ***** ** ***** **** *****                                              |      |
| Mouse-BIC_GRCm38 | <u>CCG---TGGGAGGATGACAAGTCCAAGAGTACCCTGCTGGATGAACGTAGATGTCAGAC</u>     | 1273 |
| Rn_Celera        | <u>CCGCCGTGGGAGGATGACAAGACCATGAGTCACTCTGCTGGATGAACGTAGAAGTCAGGC</u>    | 1361 |
|                  | *** ***** ** ***** ***** *                                             |      |
| Mouse-BIC_GRCm38 | <u>TCTATCATT---AATGTGCTAGTCATAACCTGGTTACTAGGATAGTCCACTGTAAGTGT</u>     | 1330 |
| Rn_Celera        | <u>TCTATCACTTCTTAATGTGCTCATCGTAACCTGGTTACTAGGATTTTCCACTGTGAGTGT</u>    | 1421 |
|                  | ***** ** ***** * ***** *****                                           |      |
| Mouse-BIC_GRCm38 | <u>TACGATAAATGTCATTTAAAAGATAGATCAGCAGTATCCTAAACAACATCTCAACTTCAA</u>    | 1390 |
| Rn_Celera        | <u>CACAATAAATGTCATTTAAAAGATTTATCAGCAGTATCCGAAACAACATCACAACCTCAG</u>    | 1481 |
|                  | ** ***** ***** ***** *****                                             |      |
| Mouse-BIC_GRCm38 | <u>GCCACATGTTTATTTTTTATCTTGAATGGAAAGTGAAACTTGTATCATTTTTATTTCAA</u>     | 1450 |
| Rn_Celera        | <u>GCCCAC--GTTTATTTTT-ATCTTGAATGGAAAATGAAACTTGTATCATTTTTATTTCAA</u>    | 1538 |
|                  | ***** ***** ***** ***** ***** **                                       |      |
| Mouse-BIC_GRCm38 | <u>AATTATGTTTCATAACCATCTTCAATGATTCAACCAGAATACAAAATGAATGCACTA-AAA</u>   | 1509 |
| Rn_Celera        | <u>AATTATGTTTCATAACCATTTTTCAATGATTCAACCAGAATGCAAAAATGAATAAACTACAAA</u> | 1598 |
|                  | ***** ***** ***** ***** ***** **                                       |      |
| Mouse-BIC_GRCm38 | <u>AGGACATTTCT-ATATTTCTGTAGTTAAAATTCAGGACGGCCATTCTCGACTGACATCTA</u>    | 1568 |
| Rn_Celera        | <u>AGGACATTTCTGATATTTCTGTAGTTAAGATCAAGGACAGCCGTTCCCGACTGACATCTA</u>    | 1658 |
|                  | ***** ***** ***** ** ***** ** *****                                    |      |
| Mouse-BIC_GRCm38 | <u>GGATTGCTGGAATACCTCTTGTAAGACTTGGAAATGGCATTTTTT--CCACATTACAAT</u>     | 1626 |
| Rn_Celera        | <u>GGATT-TCTGGAGCACCTCTTGGAAGACTGGAATGGCATTTTTTCTCCACGTTAC--T</u>      | 1715 |
|                  | ***** ***** ***** ***** ***** ***** ***** **                           |      |
| Mouse-BIC_GRCm38 | <u>GTATTAGTCAACTTTGATTTAAAATTTGTAACCTTTGTGTTTTAGTGTAAGGAAAAATTT</u>    | 1686 |
| Rn_Celera        | <u>TTATTAGTCAGCTTTGATATAAAAATTCGTAACCTTT-----AATTT</u>                 | 1756 |
|                  | ***** ***** ***** ***** ***** *****                                    |      |
