# Supplementary material
Source: PubMed Central journal article supplement (PMC3677247)
Supplement: supp_035394.112_File_6.pdf [file supp_035394.112_File_6.pdf]

SeqID 1

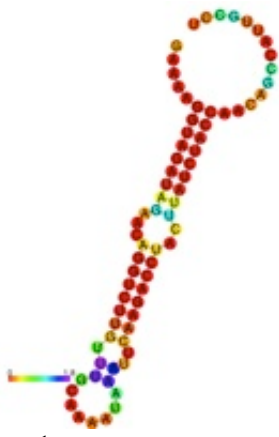

fseq\_1  
MFE-oss -22.3  
MFE-css -22.16

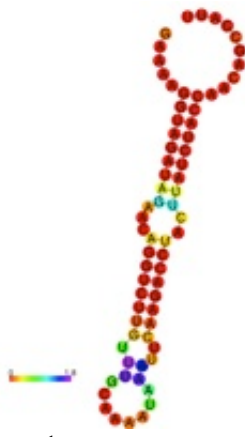

qseq\_1  
MFE-oss -22.3  
MFE-css -22.16

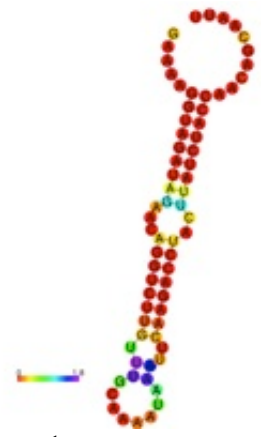

sseq\_1  
MFE-oss -22.3  
MFE-css -22.16

SeqID 2

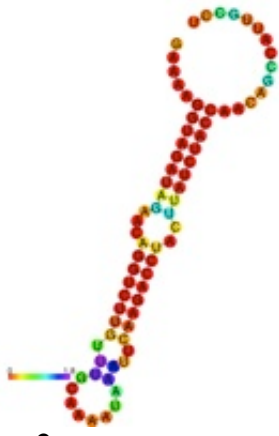

fseq\_2  
MFE-oss -22.3  
MFE-css -22.16

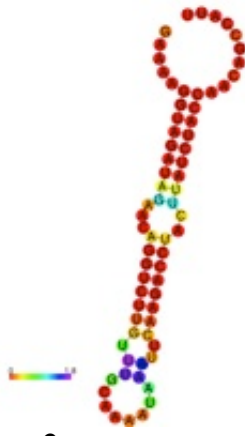

qseq\_2  
MFE-oss -22.3  
MFE-css -22.16

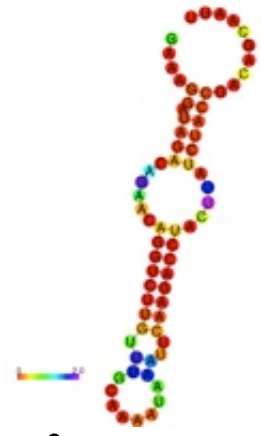

sseq\_2  
MFE-oss -14.7  
MFE-css -14.56

SeqID 3

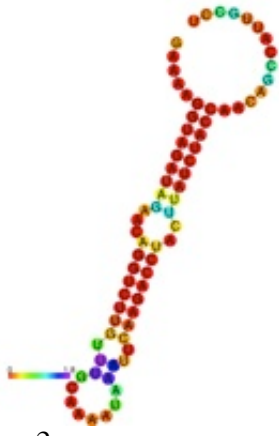

fseq\_3  
MFE-oss -22.3  
MFE-css -22.16

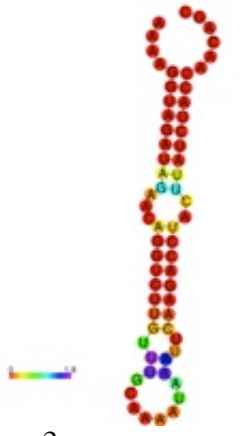

qseq\_3  
MFE-oss -22.3  
MFE-css -22.16

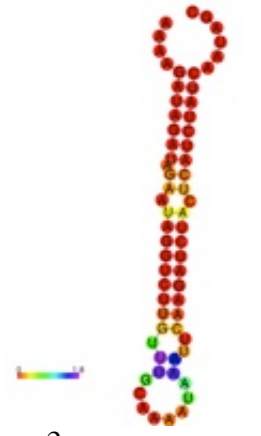

sseq\_3  
MFE-oss -19.8  
MFE-css -19.66

SeqID 4

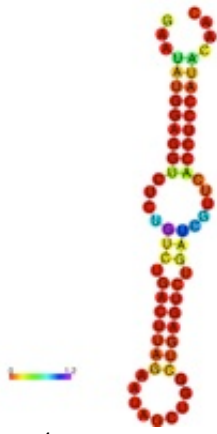

fseq\_4  
MFE-oss -23.2  
MFE-css -23.2

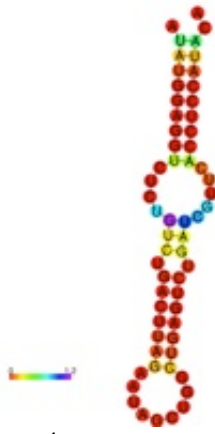

qseq\_4  
MFE-oss -23.2  
MFE-css -23.2

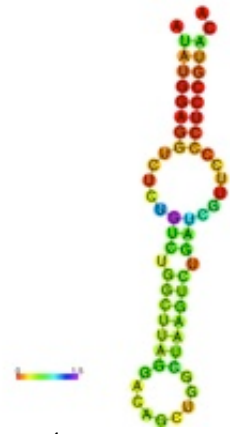

sseq\_4  
MFE-oss -20.5  
MFE-css -20.5

SeqID 5

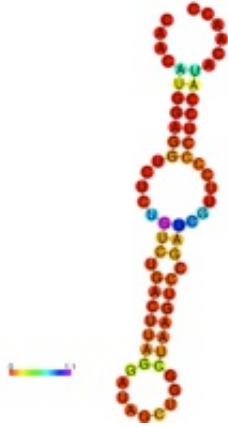

fseq\_5  
MFE-oss -20.4  
MFE-css -20.4

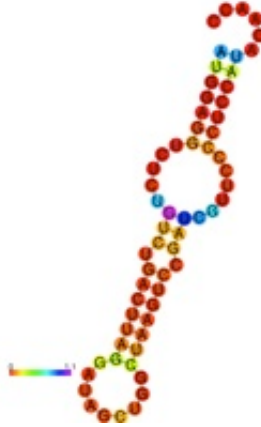

qseq\_5  
MFE-oss -20.1  
MFE-css -20.1

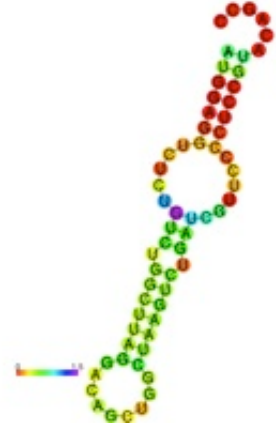

sseq\_5  
MFE-oss -19.1  
MFE-css -19.1

SeqID 6

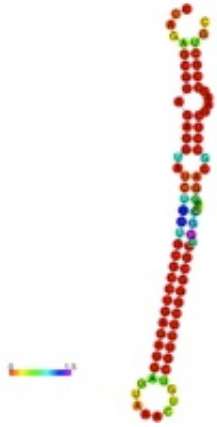

fseq\_6  
MFE-oss -43.8  
MFE-css -37.3

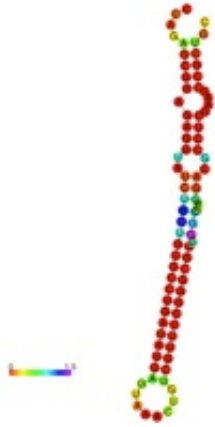

qseq\_6  
MFE-oss -43.8  
MFE-css -37.3

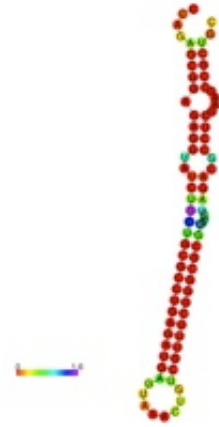

sseq\_6  
MFE-oss -44.8  
MFE-css -43.2

SeqID 7

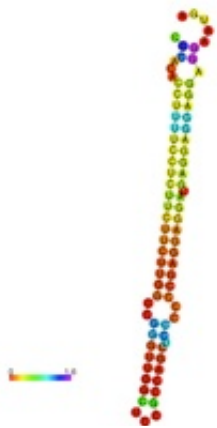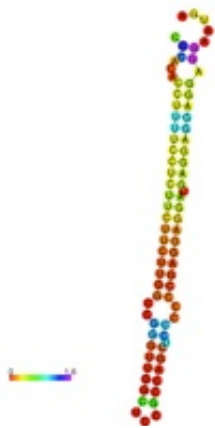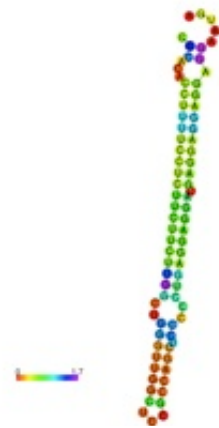

fseq\_7  
MFE-oss -41.8  
MFE-css -41.8

qseq\_7  
MFE-oss -41.8  
MFE-css -41.8

sseq\_7  
MFE-oss -39  
MFE-css -34.9

SeqID 8

fseq\_8  
MFE-oss -29.2  
MFE-css -29.2

qseq\_8  
MFE-oss -28.3  
MFE-css -28.3

sseq\_8  
MFE-oss -26.9  
MFE-css -26.9

SeqID 9

fseq\_9  
MFE-oss -39.6  
MFE-css -39.6

qseq\_9  
MFE-oss -39.6  
MFE-css -39.6

sseq\_9  
MFE-oss -36.5  
MFE-css -36.5

SeqID 10

fseq\_10  
MFE-oss -28.5  
MFE-css -28.5

qseq\_10  
MFE-oss -28.5  
MFE-css -28.5

sseq\_10  
MFE-oss -26.5  
MFE-css -26.5

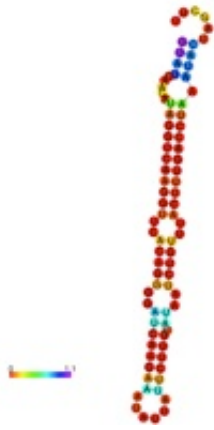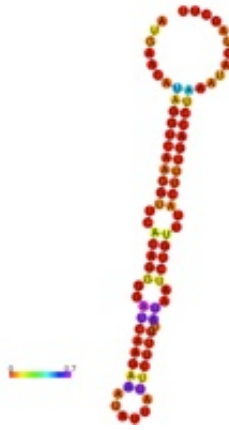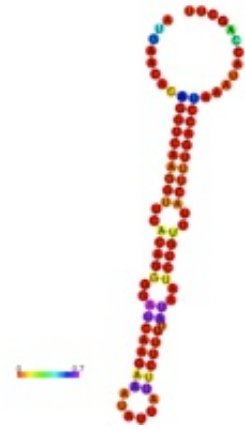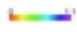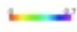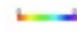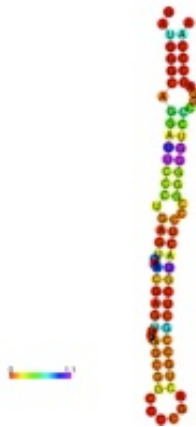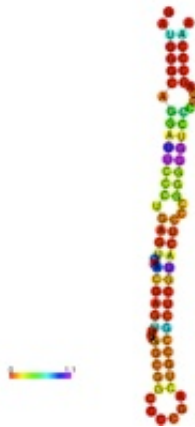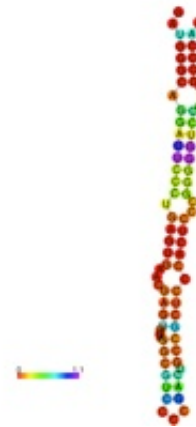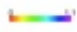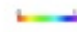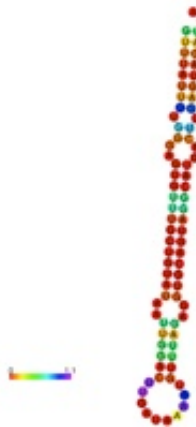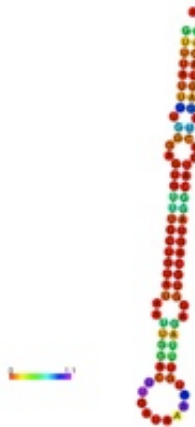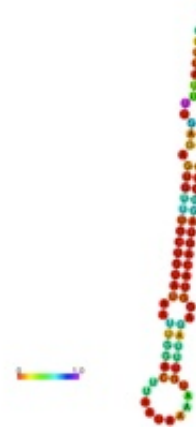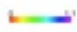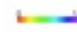

SeqID 11

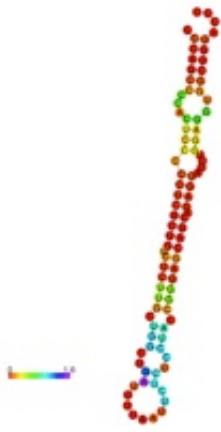

fseq\_11  
MFE-oss -39  
MFE-css -38.2

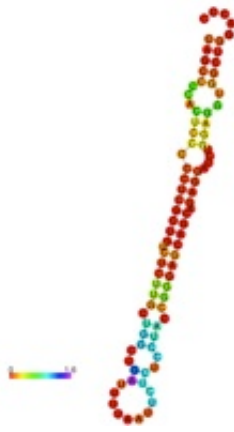

qseq\_11  
MFE-oss -35.6  
MFE-css -34.8

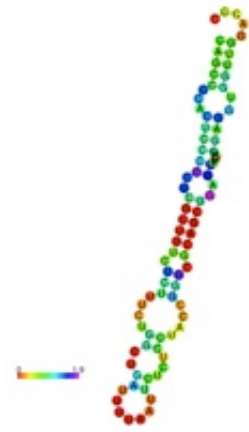

sseq\_11  
MFE-oss -29  
MFE-css -23.1

SeqID 12

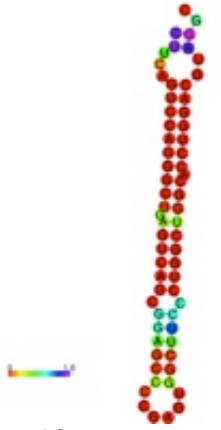

fseq\_12  
MFE-oss -36.6  
MFE-css -36.3

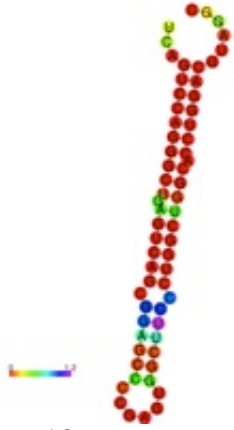

qseq\_12  
MFE-oss -36.3  
MFE-css -36.3

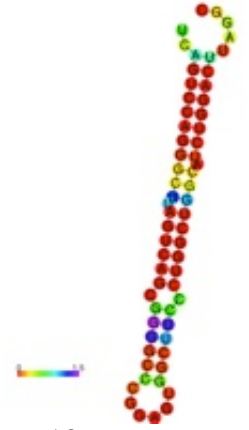

sseq\_12  
MFE-oss -32.6  
MFE-css -32.6

SeqID 13

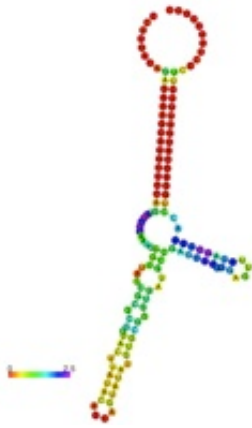

fseq\_13  
MFE-oss -53.1  
MFE-css -45.05

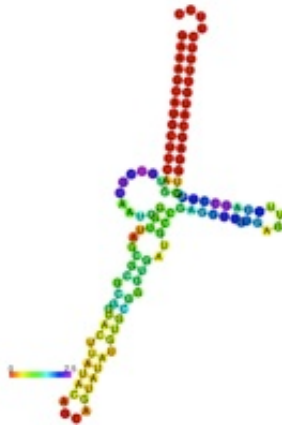

qseq\_13  
MFE-oss -51  
MFE-css -42.95

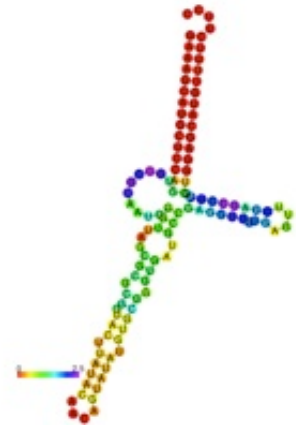

sseq\_13  
MFE-oss -51  
MFE-css -42.95

SeqID 14

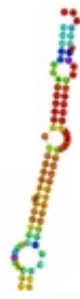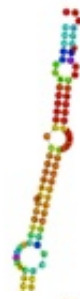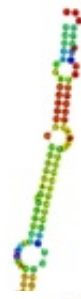

SeqID 15

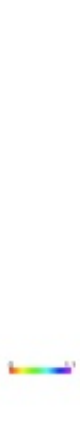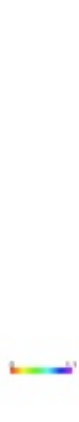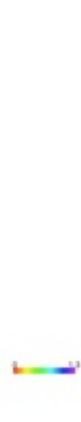

fseq\_15  
MFE-oss -59.5  
MFE-css -59.5

qseq\_15  
MFE-oss -59.5  
MFE-css -59.5

sseq\_15  
MFE-oss -62  
MFE-css -62

SeqID 16

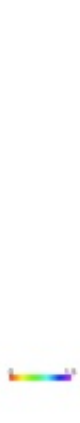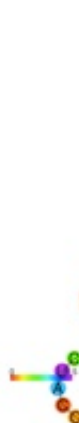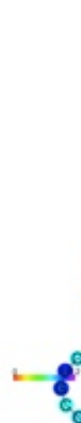

fseq\_16  
MFE-oss -14.3  
MFE-css -14.3

qseq\_16  
MFE-oss -9  
MFE-css -9

sseq\_16  
MFE-oss -9  
MFE-css 0

SeqID 17

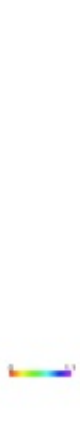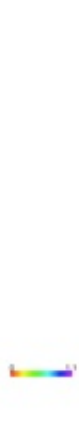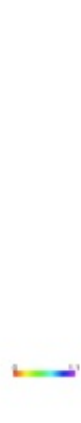

fseq\_17  
MFE-oss -38.5  
MFE-css -38.5

qseq\_17  
MFE-oss -38.5  
MFE-css -38.5

sseq\_17  
MFE-oss -38.9  
MFE-css -38.9

SeqID 18

fseq\_18

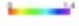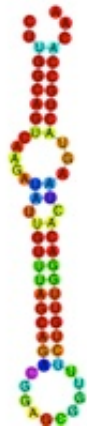

qseq\_18

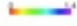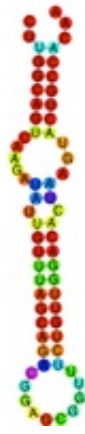

sseq\_18

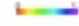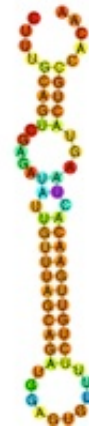

SeqID 19

fseq\_19

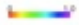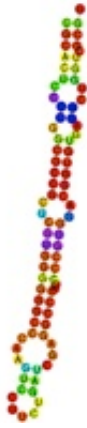

qseq\_19

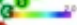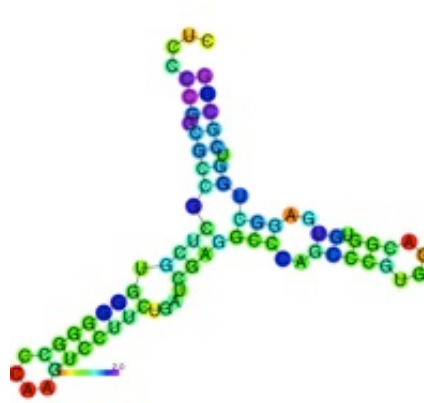

sseq\_19

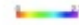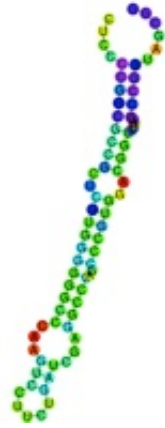

MFE-oss -38.3  
MFE-css -38.3

MFE-oss -32.3  
MFE-css -22.3

MFE-oss -33.4  
MFE-css -24.7

SeqID 20

fseq\_20

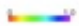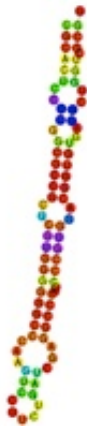

qseq\_20

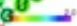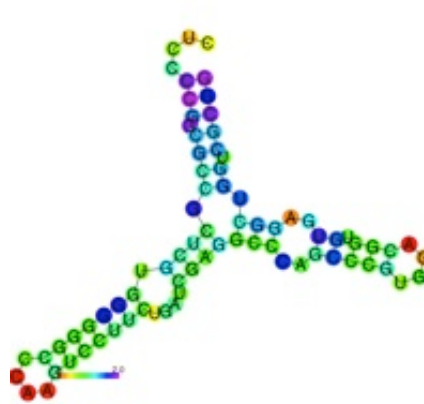

sseq\_20

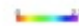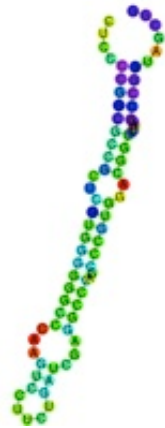

MFE-oss -38.3  
MFE-css -38.3

MFE-oss -32.3  
MFE-css -22.3

MFE-oss -33.4  
MFE-css -24.7

SeqID 21

fseq\_21

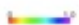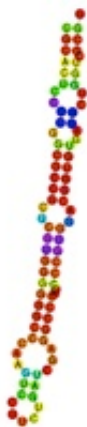

qseq\_21

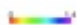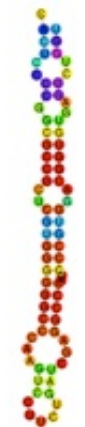

sseq\_21

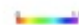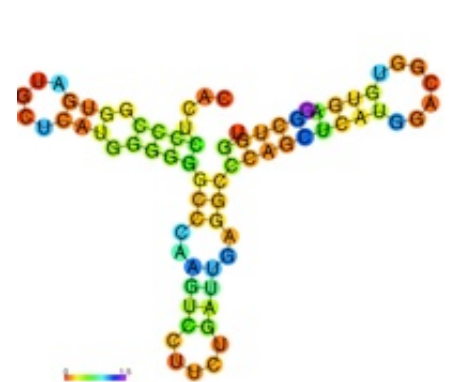

MFE-oss -38.3  
MFE-css -38.3

MFE-oss -32.7  
MFE-css -32.7

MFE-oss -29.3  
MFE-css -29.3

SeqID 22

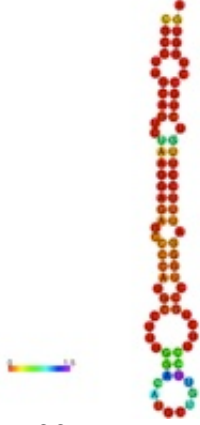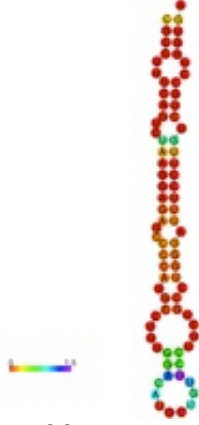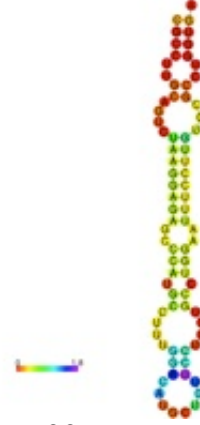

fseq\_22  
MFE-oss -32.8  
MFE-css -32.8

qseq\_22  
MFE-oss -32.8  
MFE-css -32.8

sseq\_22  
MFE-oss -25.2  
MFE-css -20.4

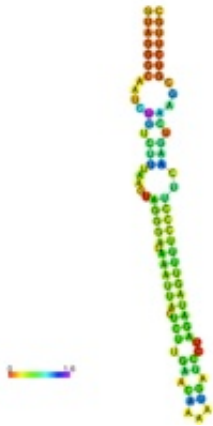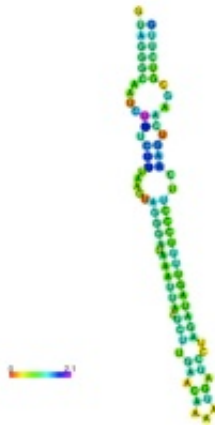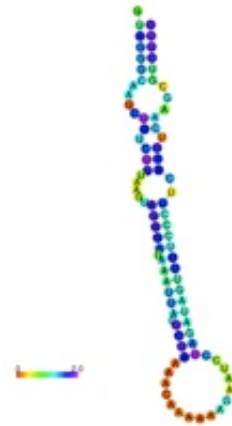

SeqID 23 fseq\_23  
MFE-oss -18.4  
MFE-css -18.7

qseq\_23  
MFE-oss -15.6  
MFE-css -15.6

sseq\_23  
MFE-oss -15.29  
MFE-css -5.87

SeqID 24

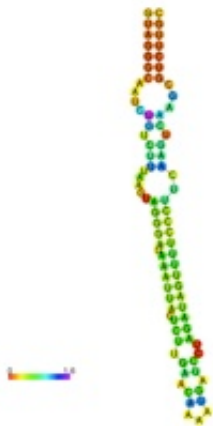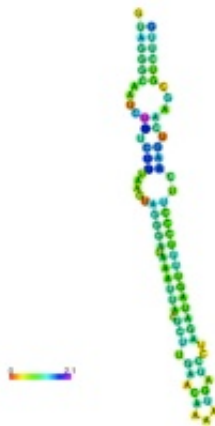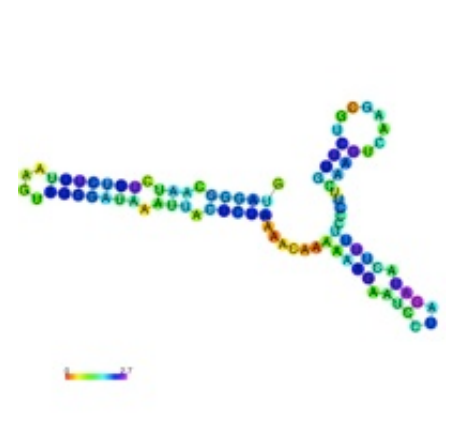

fseq\_24  
MFE-oss -18.4  
MFE-css -18.7

qseq\_24  
MFE-oss -15.6  
MFE-css -15.6

sseq\_24  
MFE-oss -12.1  
MFE-css 0

SeqID 25

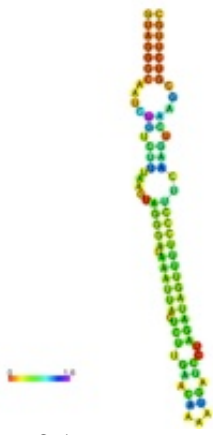

fseq\_25  
MFE-oss -18.4  
MFE-css -18.7

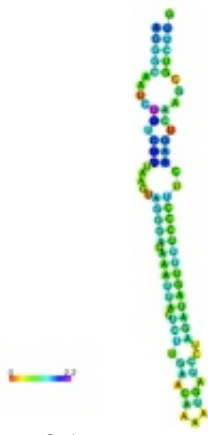

qseq\_25  
MFE-oss -15.1  
MFE-css -13.8

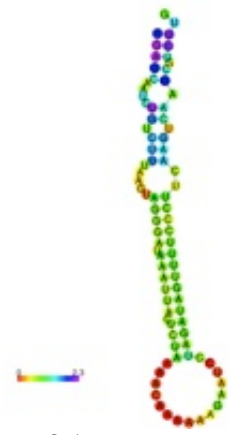

sseq\_25  
MFE-oss -13.09  
MFE-css -10.89

SeqID 26

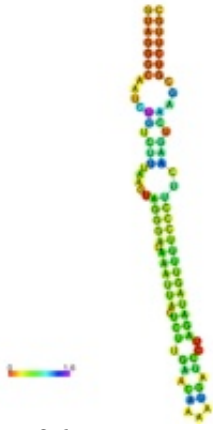

fseq\_26  
MFE-oss -18.4  
MFE-css -18.7

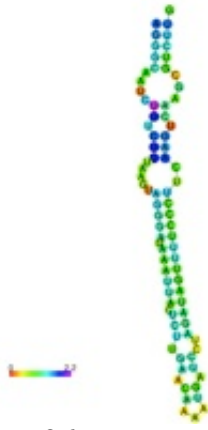

qseq\_26  
MFE-oss -15.1  
MFE-css -13.8

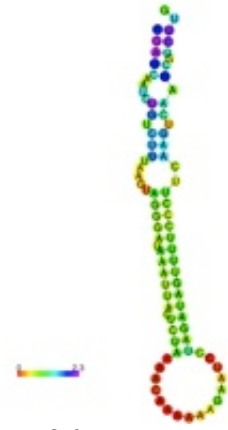

sseq\_26  
MFE-oss -13.09  
MFE-css -10.89

SeqID 27

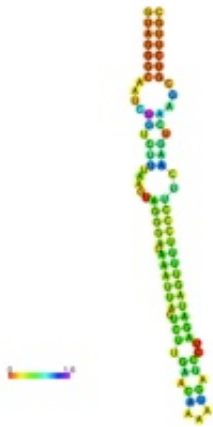

fseq\_27  
MFE-oss -18.4  
MFE-css -18.7

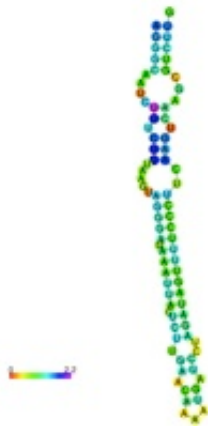

qseq\_27  
MFE-oss -15.1  
MFE-css -13.8

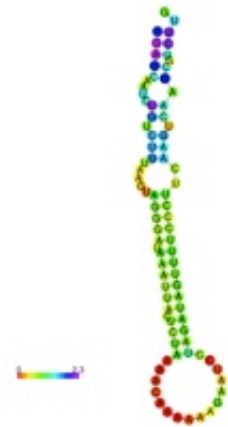

sseq\_27  
MFE-oss -13.09  
MFE-css -10.89



SeqID 28

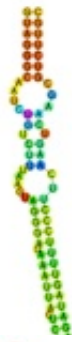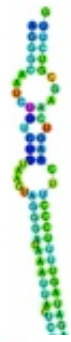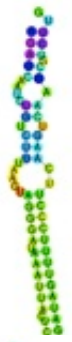

SeqID 29

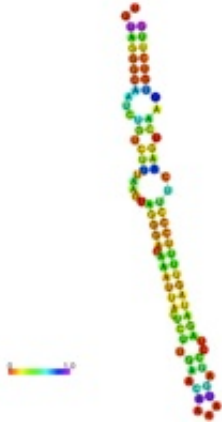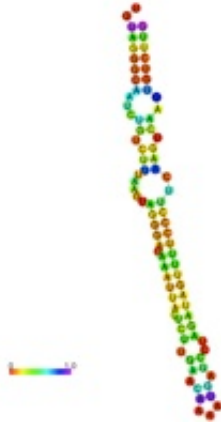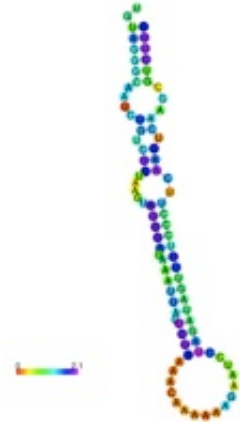

fseq\_29  
MFE-oss -18.5  
MFE-css -18.8

qseq\_29  
MFE-oss -18.5  
MFE-css -18.8

sseq\_29  
MFE-oss -15.29  
MFE-css -7.45

SeqID 30

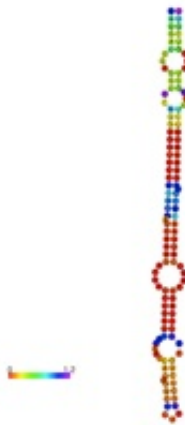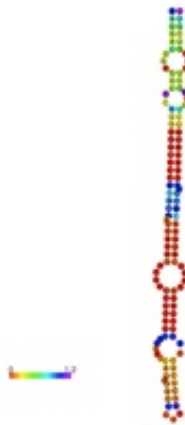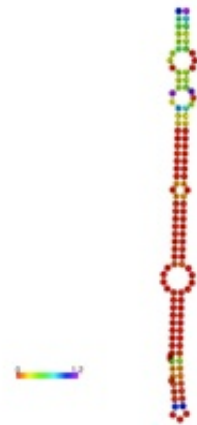

fseq\_30  
MFE-oss -48.9  
MFE-css -48.9

qseq\_30  
MFE-oss -48.9  
MFE-css -48.9

sseq\_30  
MFE-oss -56.6  
MFE-css -56.6

SeqID 31

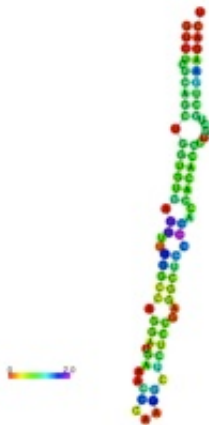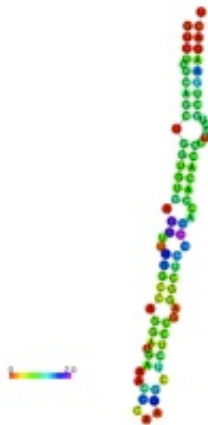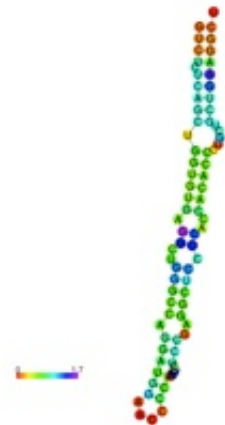

fseq\_31  
MFE-oss -32.7  
MFE-css -31

qseq\_31  
MFE-oss -32.7  
MFE-css -31

sseq\_31  
MFE-oss -33.2  
MFE-css -33.2

SeqID 32

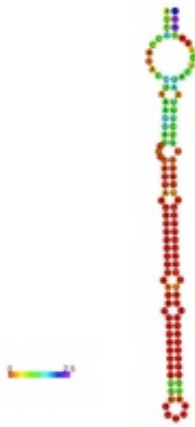

fseq\_32  
MFE-oss -40.32  
MFE-css -40.2

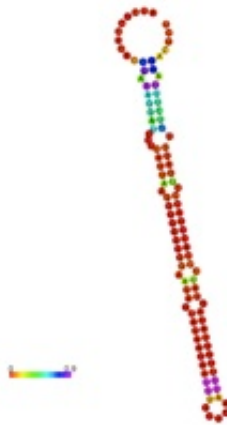

qseq\_32  
MFE-oss -40.2  
MFE-css -40.2

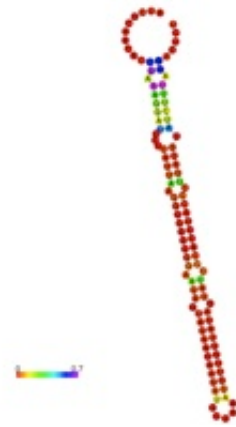

sseq\_32  
MFE-oss -40.9  
MFE-css -40.9

SeqID 33

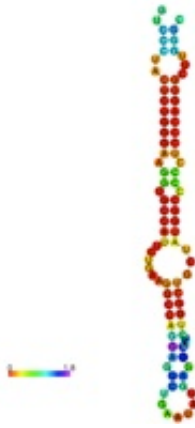

fseq\_33  
MFE-oss -41.5  
MFE-css -41.5

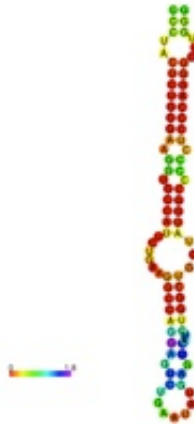

qseq\_33  
MFE-oss -41  
MFE-css -41

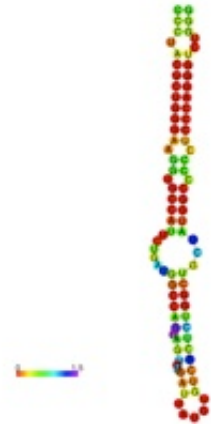

sseq\_33  
MFE-oss -42.1  
MFE-css -40.5

SeqID 34

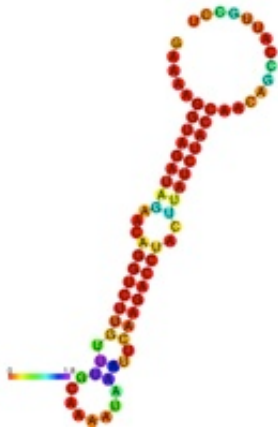

fseq\_34  
MFE-oss -22.3  
MFE-css -22.16

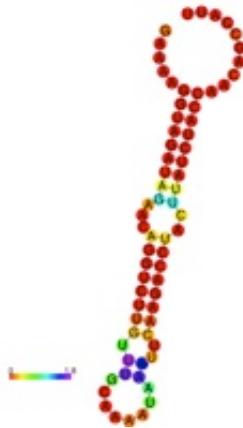

qseq\_34  
MFE-oss -22.3  
MFE-css -22.16

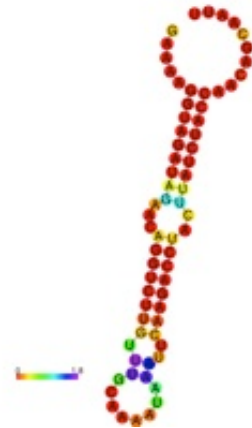

sseq\_34  
MFE-oss -22.3  
MFE-css -22.16

SeqID 35

SeqID 36

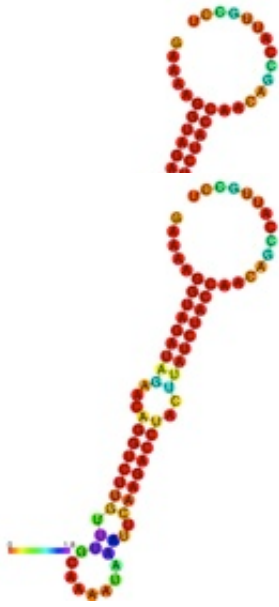

fseq\_36  
MFE-oss -22.3  
MFE-css -22.16

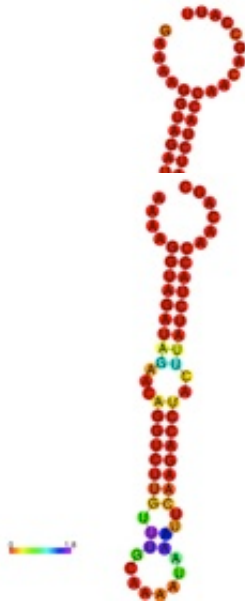

qseq\_36  
MFE-oss -22.3  
MFE-css -22.16

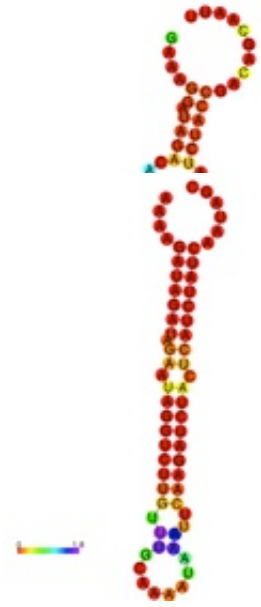

sseq\_36  
MFE-oss -19.8  
MFE-css -19.66

SeqID 37

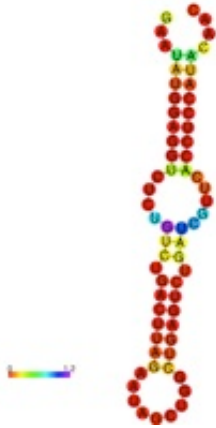

fseq\_37  
MFE-oss -23.2  
MFE-css -23.2

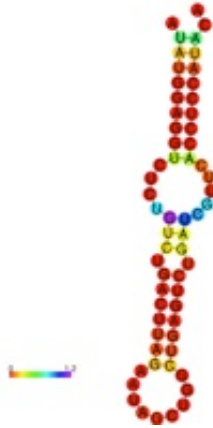

qseq\_37  
MFE-oss -23.2  
MFE-css -23.2

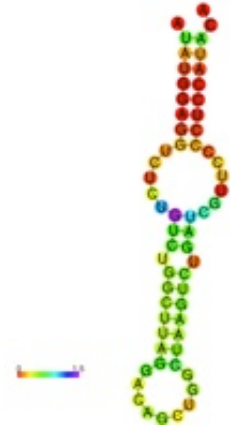

sseq\_37  
MFE-oss -20.9  
MFE-css -20.9

SeqID 38

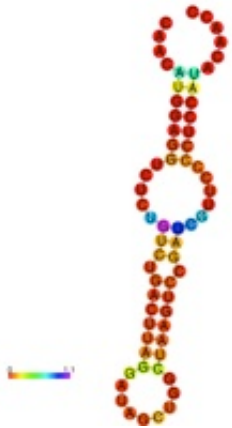

fseq\_38  
MFE-oss -20.4  
MFE-css -20.4

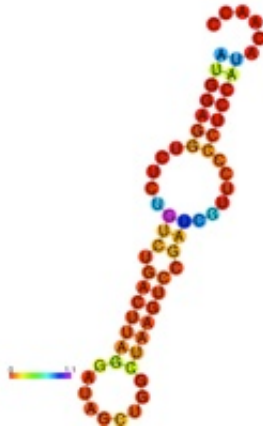

qseq\_38  
MFE-oss -20.1  
MFE-css -20.1

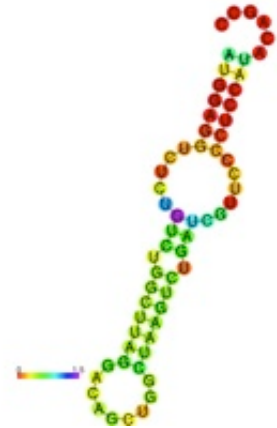

sseq\_38  
MFE-oss -19.5  
MFE-css -19.5

SeqID 39

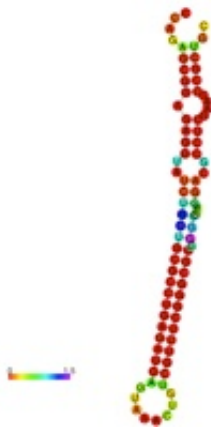

fseq\_39  
MFE-oss -43.8  
MFE-css -37.3

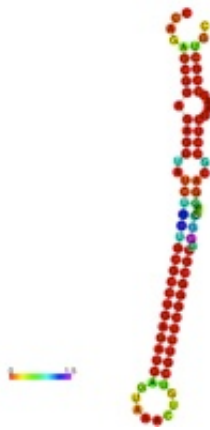

qseq\_39  
MFE-oss -43.8  
MFE-css -37.3

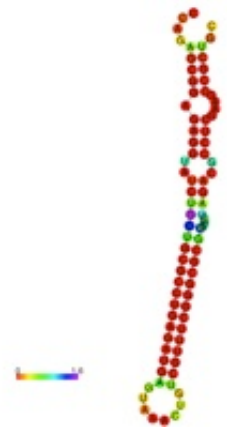

sseq\_39  
MFE-oss -44.8  
MFE-css -43.2

SeqID 40

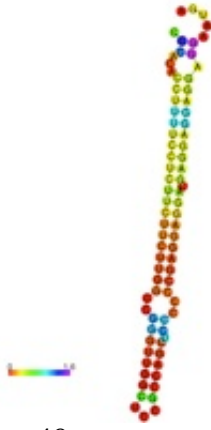

fseq\_40  
MFE-oss -41.8  
MFE-css -41.8

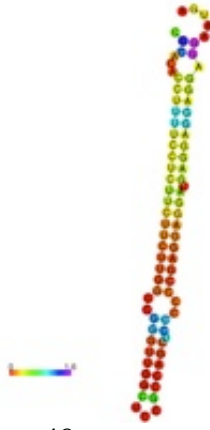

qseq\_40  
MFE-oss -41.8  
MFE-css -41.8

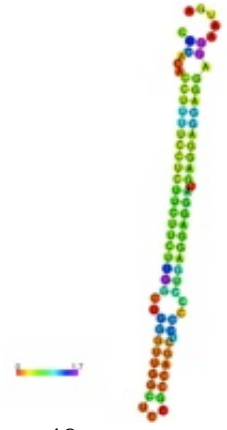

sseq\_40  
MFE-oss -39  
MFE-css -34.9

SeqID 41

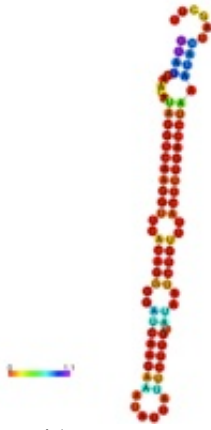

fseq\_41  
MFE-oss -29.2  
MFE-css -29.2

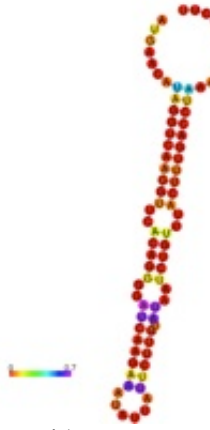

qseq\_41  
MFE-oss -28.3  
MFE-css -28.3

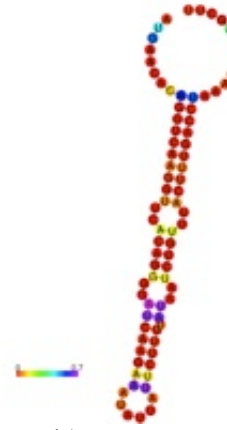

sseq\_41  
MFE-oss -26.9  
MFE-css -26.9

SeqID 42

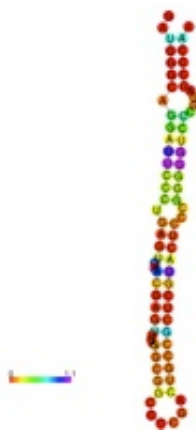

fseq\_42  
MFE-oss -39.6  
MFE-css -39.6

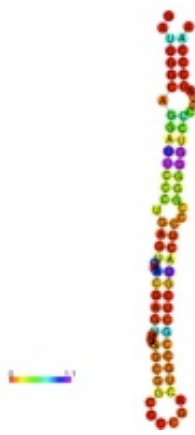

qseq\_42  
MFE-oss -39.6  
MFE-css -39.6

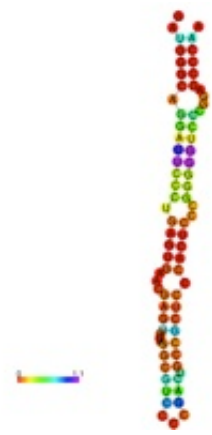

sseq\_42  
MFE-oss -36.5  
MFE-css -36.5

SeqID 43

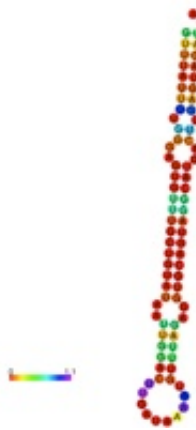

fseq\_43  
MFE-oss -28.5  
MFE-css -28.5

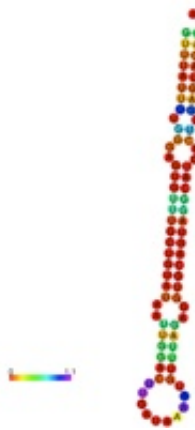

qseq\_43  
MFE-oss -28.5  
MFE-css -28.5

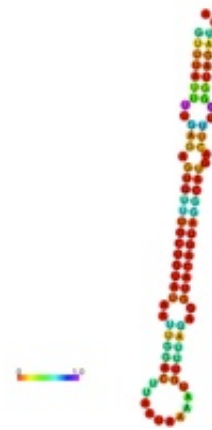

sseq\_43  
MFE-oss -26.5  
MFE-css -26.5

SeqID 44

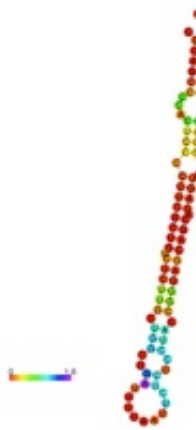

fseq\_44  
MFE-oss -39  
MFE-css -38.2

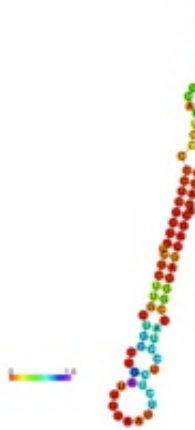

qseq\_44  
MFE-oss -35.6  
MFE-css -34.8

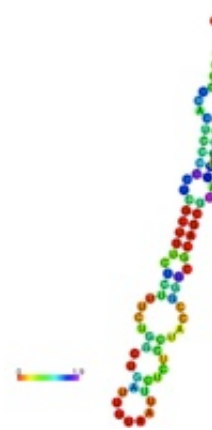

sseq\_44  
MFE-oss -29  
MFE-css -23.1

SeqID 45

SeqID 46

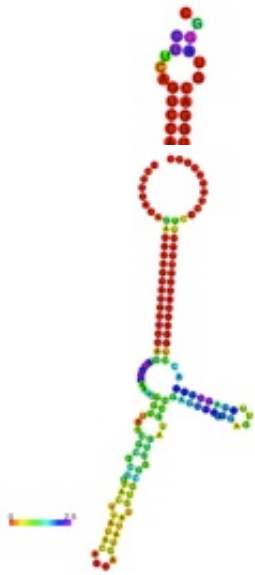

fseq\_46  
MFE-oss -53.1  
MFE-css -45.05

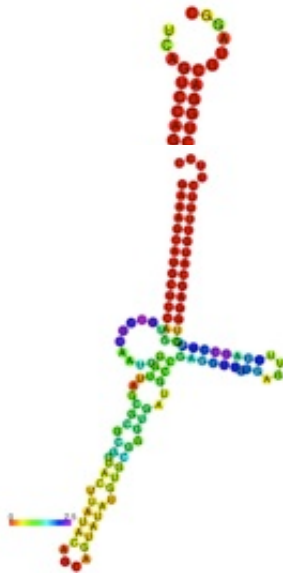

qseq\_46  
MFE-oss -51  
MFE-css -42.95

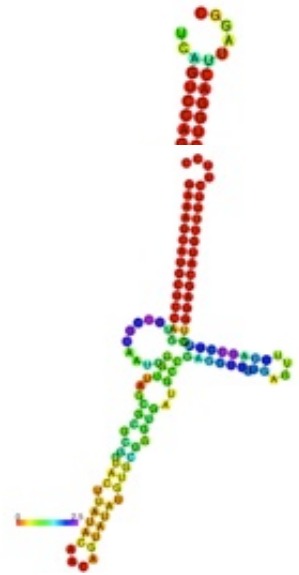

sseq\_46  
MFE-oss -51  
MFE-css -42.95

SeqID 47

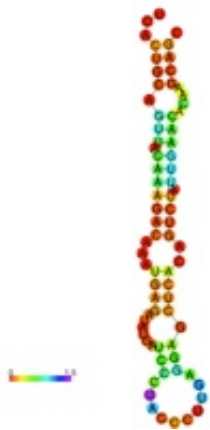

fseq\_47  
MFE-oss -14.3  
MFE-css -14.3

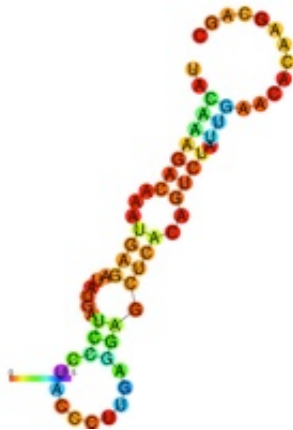

qseq\_47  
MFE-oss -9  
MFE-css -9

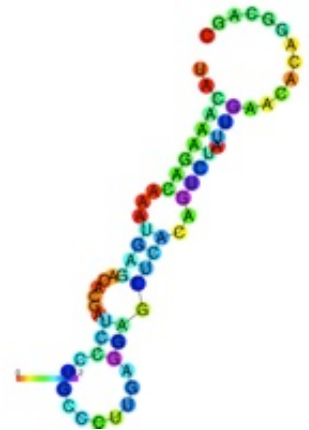

sseq\_47  
MFE-oss -9  
MFE-css 0

SeqID 48

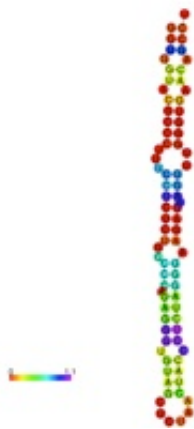

fseq\_48  
MFE-oss -38.5  
MFE-css -38.5



qseq\_48  
MFE-oss -38.5  
MFE-css -38.5

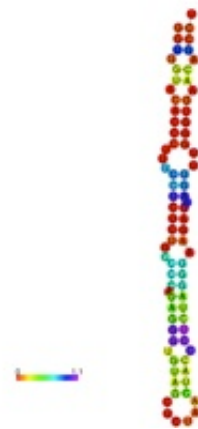

sseq\_48  
MFE-oss -38.9  
MFE-css -38.9

SeqID 49

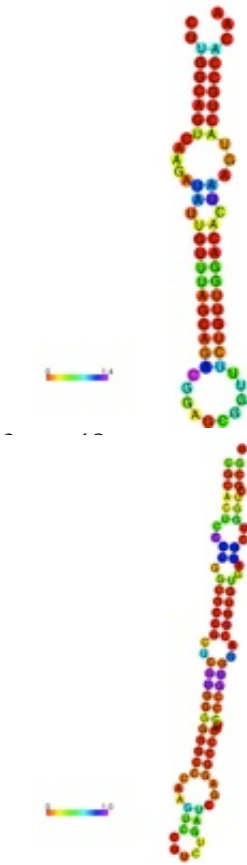

fseq\_50  
MFE-oss -38.3  
MFE-css -38.3

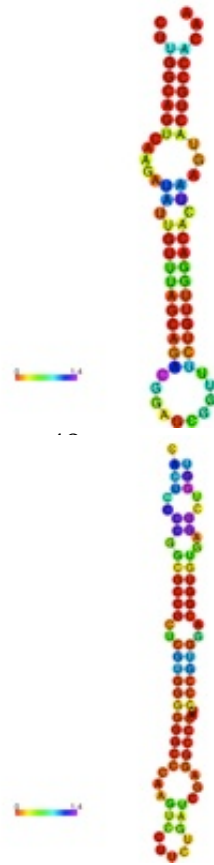

qseq\_50  
MFE-oss -32.7  
MFE-css -32.7

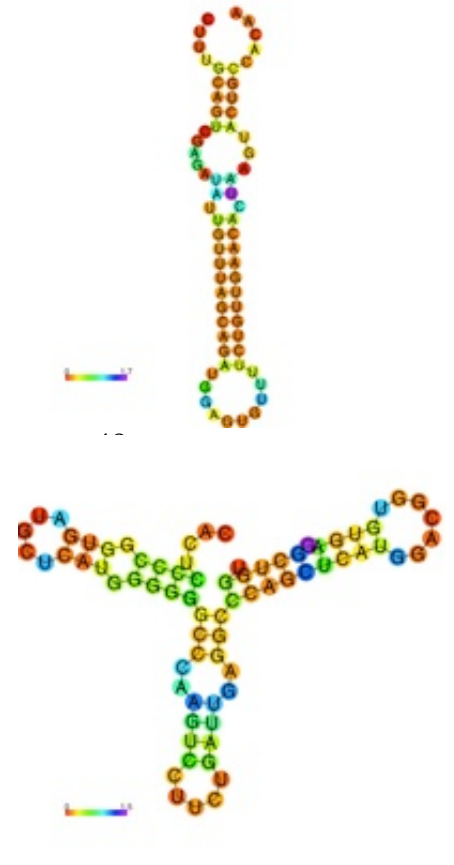

sseq\_50  
MFE-oss -29.3  
MFE-css -29.3

SeqID 51

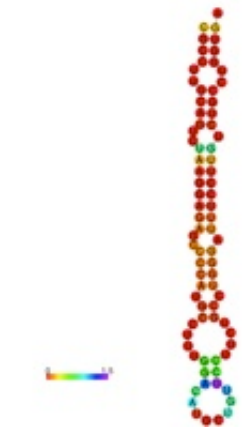

fseq\_51  
MFE-oss -32.8  
MFE-css -32.8

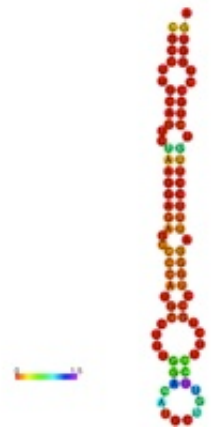

qseq\_51  
MFE-oss -32.8  
MFE-css -32.8

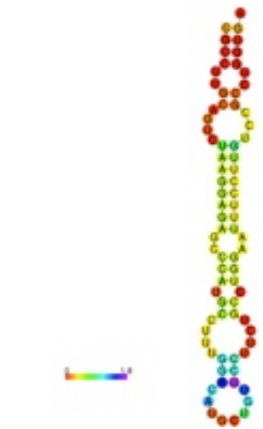

sseq\_51  
MFE-oss -25.2  
MFE-css -20.4

SeqID 52

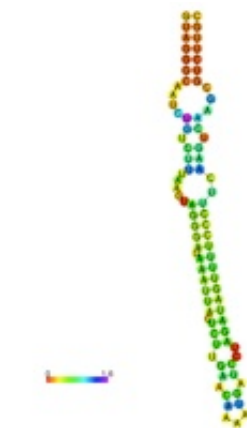

fseq\_52

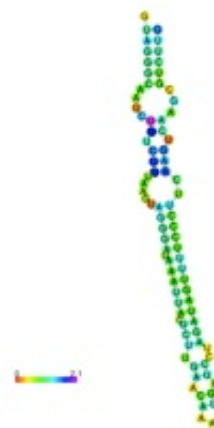

qseq\_52

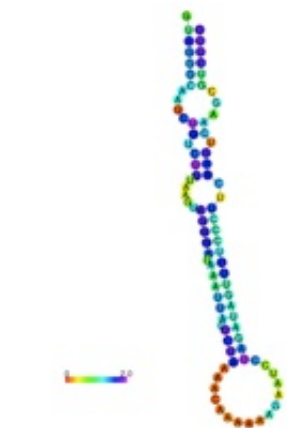

sseq\_52

MFE-oss -18.4  
MFE-css -18.7

MFE-oss -15.6  
MFE-css -15.6

MFE-oss -15.29  
MFE-css -5.87

SeqID 53

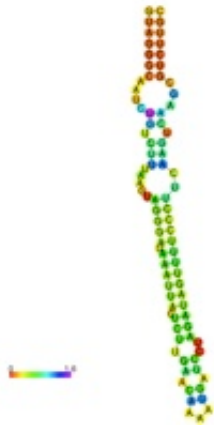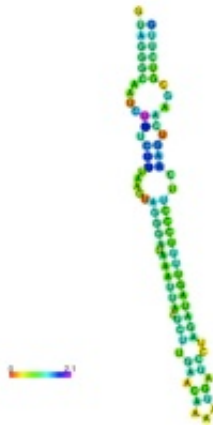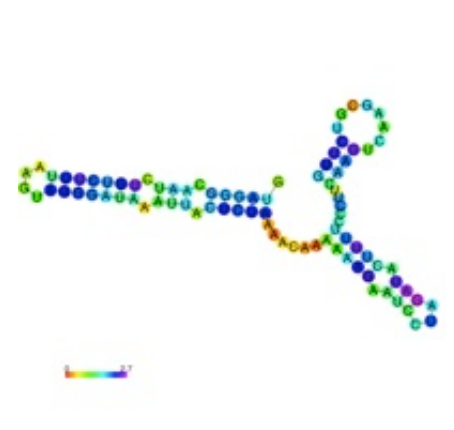

fseq\_53  
MFE-oss -18.4  
MFE-css -18.7

qseq\_53  
MFE-oss -15.6  
MFE-css -15.6

sseq\_53  
MFE-oss -12.1  
MFE-css 0

SeqID 54

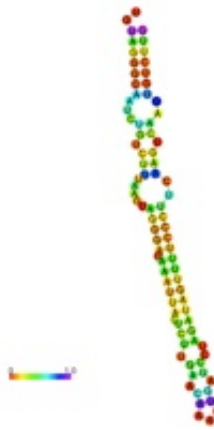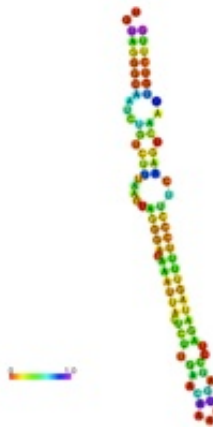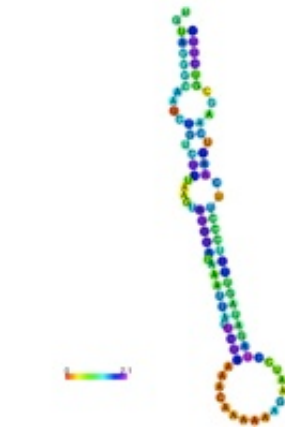

fseq\_54  
MFE-oss -18.5  
MFE-css -18.8

qseq\_54  
MFE-oss -18.5  
MFE-css -18.8

sseq\_54  
MFE-oss -15.29  
MFE-css -7.45

SeqID 55

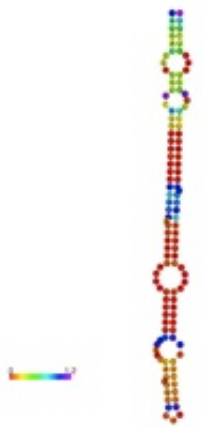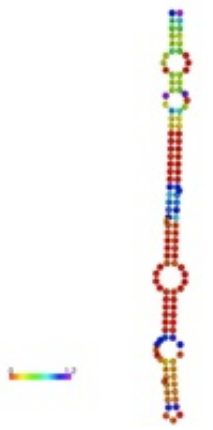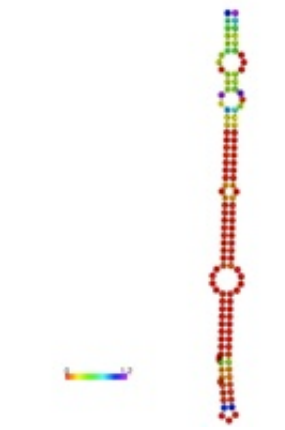

fseq\_55  
MFE-oss -48.9  
MFE-css -48.9

qseq\_55  
MFE-oss -48.9  
MFE-css -48.9

sseq\_55  
MFE-oss -56.6  
MFE-css -56.6

SeqID 56



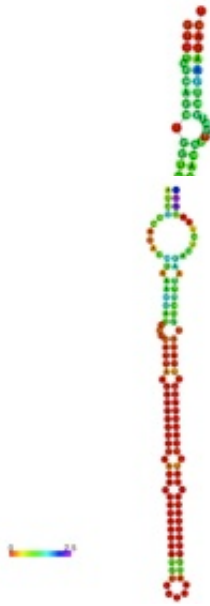

SeqID **57** fseq\_57  
 MFE-oss -40.32  
 MFE-css -40.2

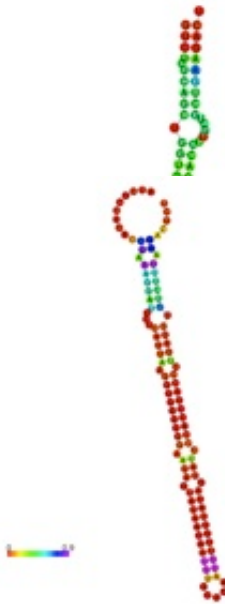

qseq\_57  
 MFE-oss -40.2  
 MFE-css -40.2

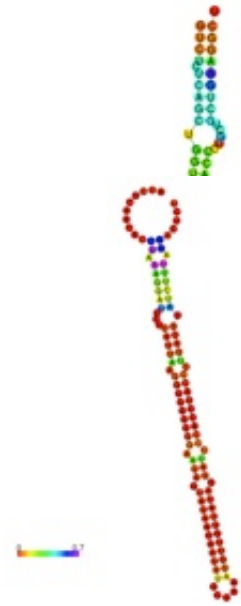

sseq\_57  
 MFE-oss -40.9  
 MFE-css -40.9

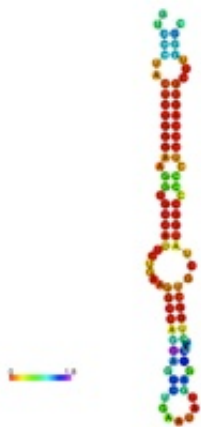

SeqID **58**  
 fseq\_58  
 MFE-oss -41.5  
 MFE-css -41.5

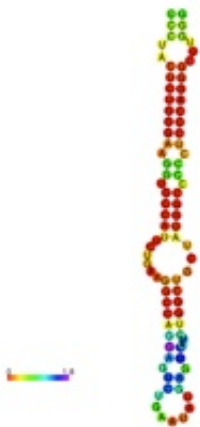

qseq\_58  
 MFE-oss -41  
 MFE-css -41

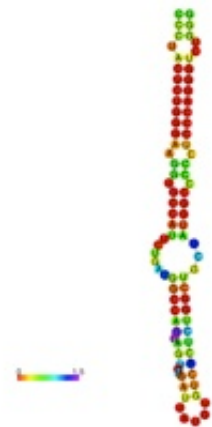

sseq\_58  
 MFE-oss -42.1  
 MFE-css -40.5

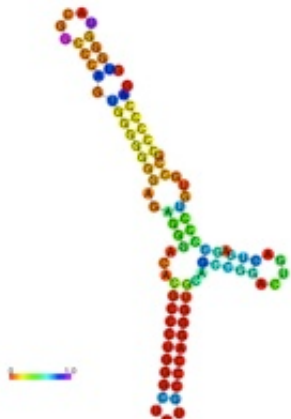

SeqID **60**

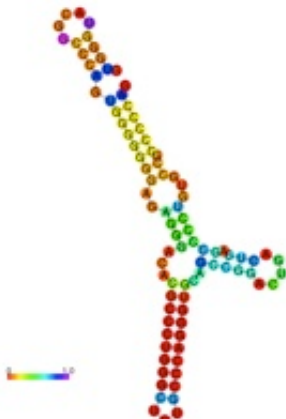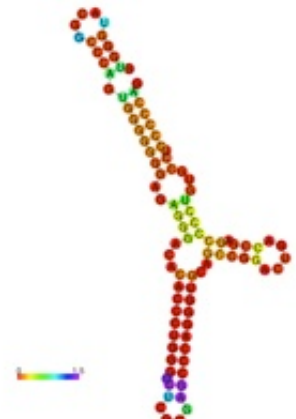

fseq\_60  
MFE-oss -50.8  
MFE-css 50.8

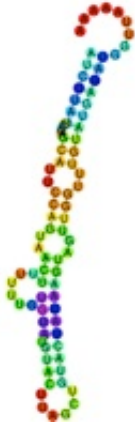

qseq\_60  
MFE-oss -50.8  
MFE-css 50.8

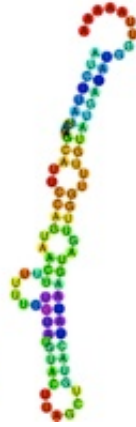

sseq\_60  
MFE-oss -53  
MFE-css 51.6

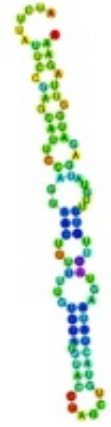

SeqID 61

fseq\_61  
MFE-oss -16.7  
MFE-css -13.5

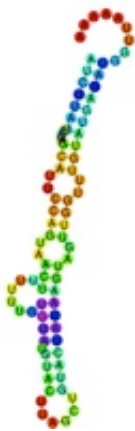

qseq\_61  
MFE-oss -16.7  
MFE-css -13.5

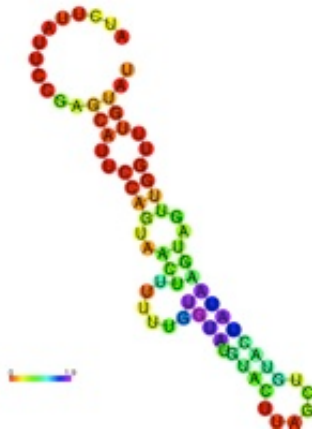

sseq\_61  
MFE-oss -13.2  
MFE-css -9.74

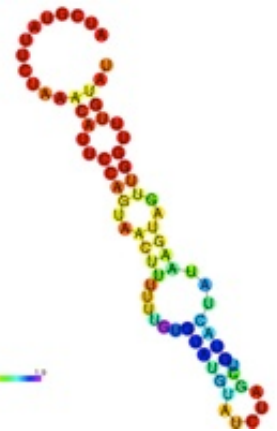

SeqID 62

fseq\_62  
MFE-oss -16.7  
MFE-css -13.5

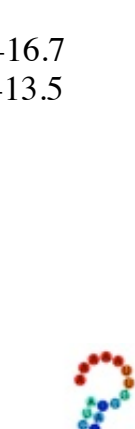

qseq\_62  
MFE-oss -13  
MFE-css -12.9

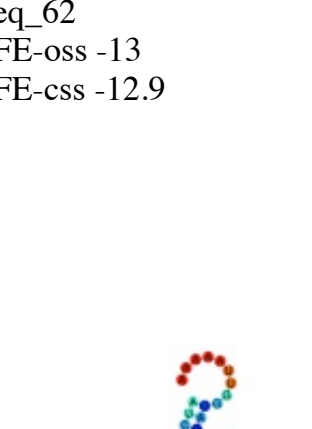

sseq\_62  
MFE-oss -11.4  
MFE-css -11.4

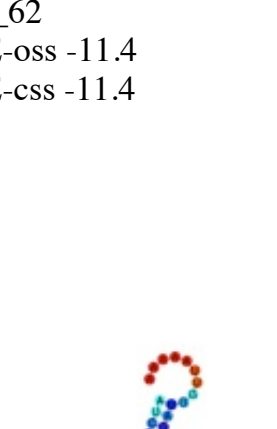

SeqID 63

fseq\_63  
MFE-oss -16.7  
MFE-css -13.5

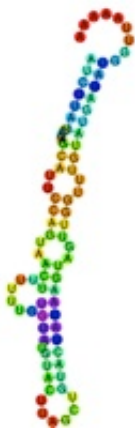

qseq\_63  
MFE-oss -16.7  
MFE-css -13.5

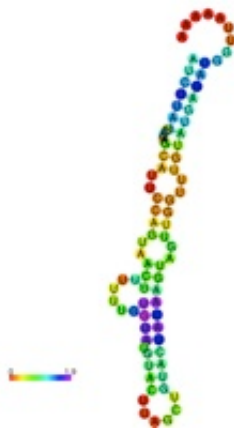

sseq\_63  
MFE-oss -16.6  
MFE-css -12.7

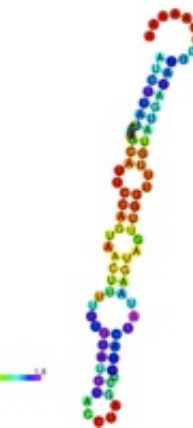

SeqID 64

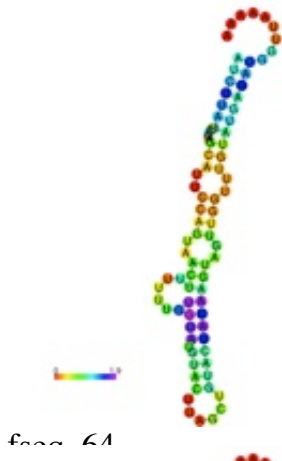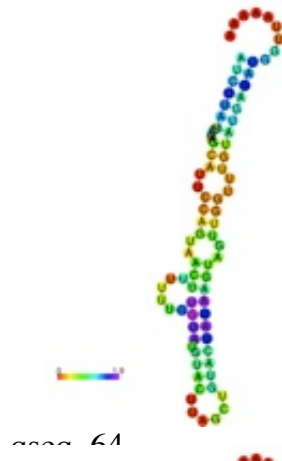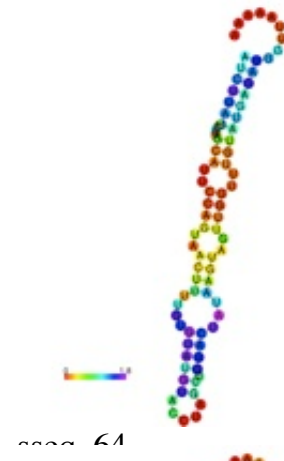

SeqID 65

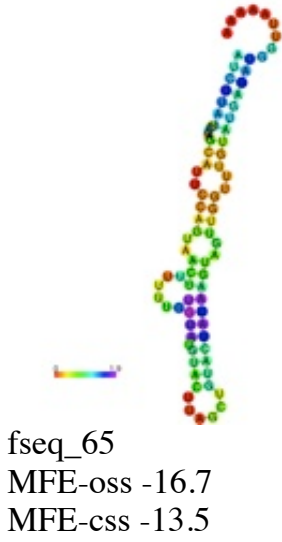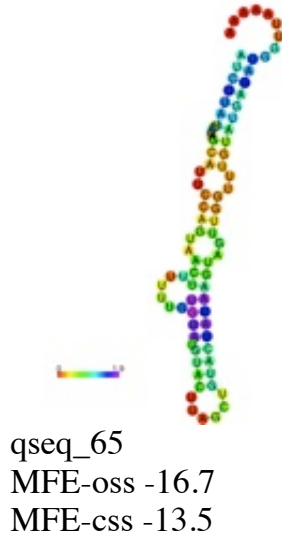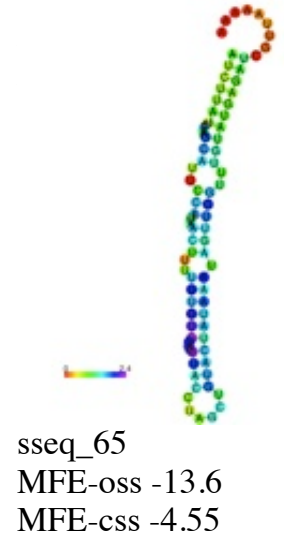

SeqID 66

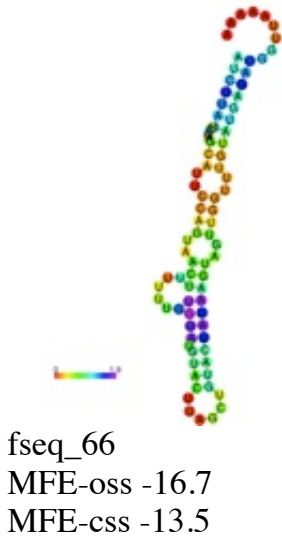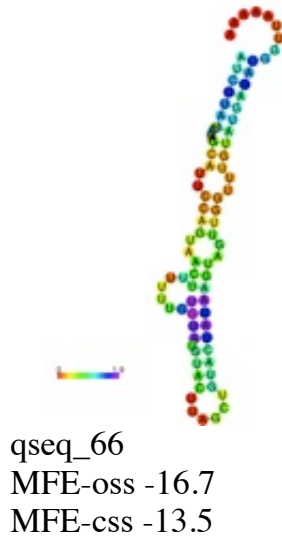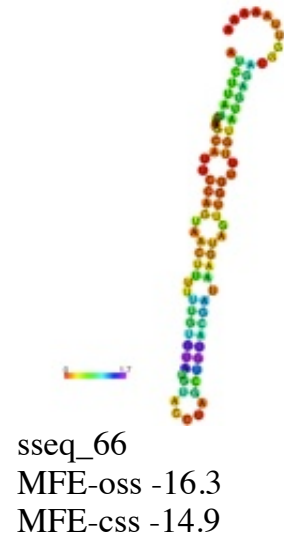

SeqID 67

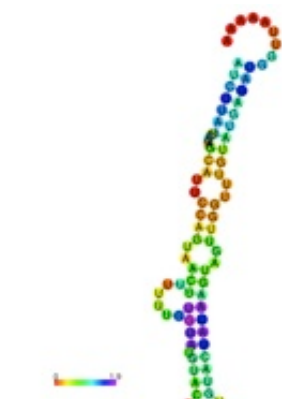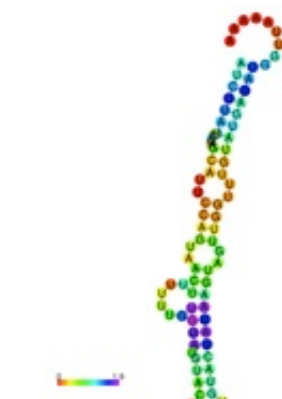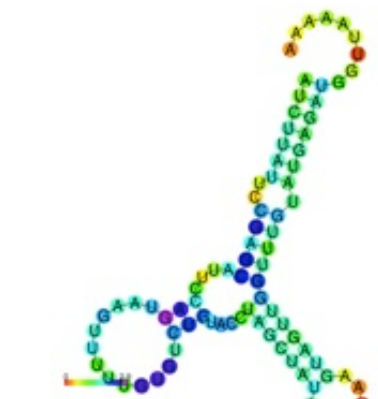

fseq\_67  
MFE-oss -16.7  
MFE-css -13.5

qseq\_67  
MFE-oss -16.7  
MFE-css -13.5

sseq\_67  
MFE-oss -13.32  
MFE-css -3.95

SeqID 68

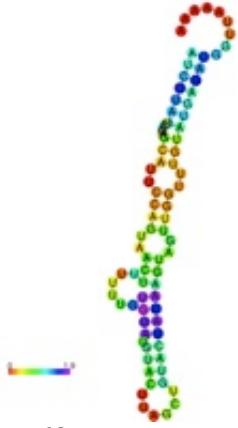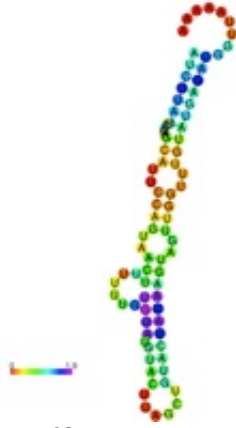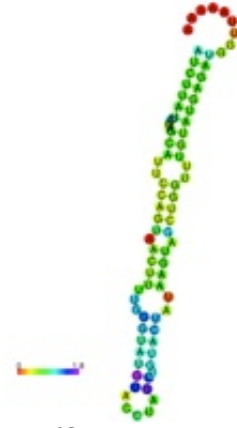

fseq\_68  
MFE-oss -16.7  
MFE-css -13.5

qseq\_68  
MFE-oss -16.7  
MFE-css -13.5

sseq\_68  
MFE-oss -22.4  
MFE-css -21.3

SeqID 70

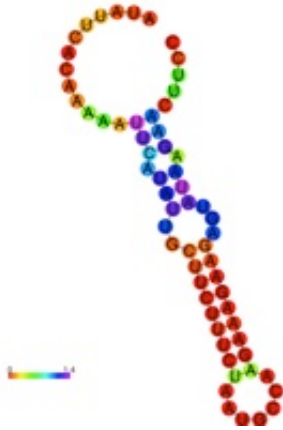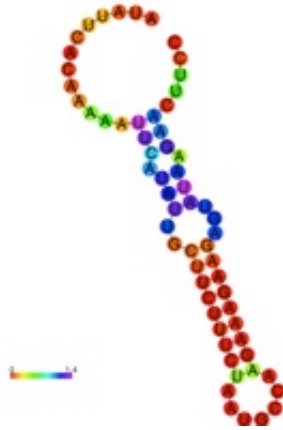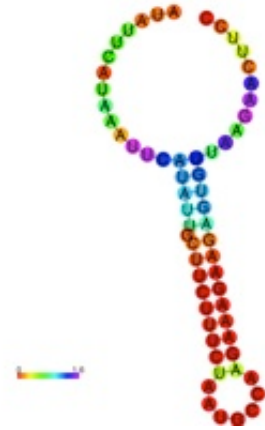

fseq\_70  
MFE-oss -12.1  
MFE-css -10.5

qseq\_70  
MFE-oss -12.1  
MFE-css -10.5

sseq\_70  
MFE-oss -11.3  
MFE-css -11.3

SeqID 71

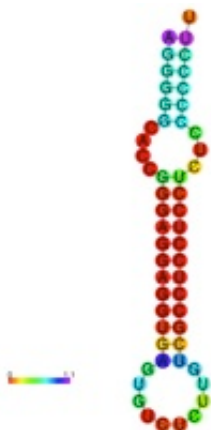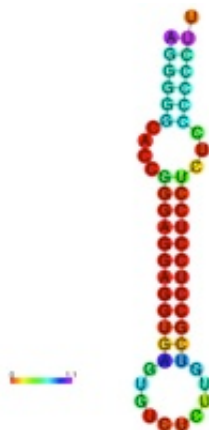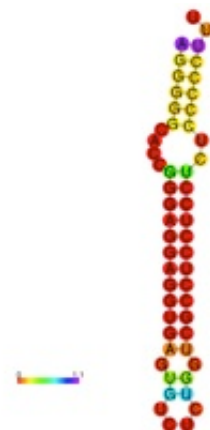

fseq\_71  
MFE-oss -32.5  
MFE-css -32.5

qseq\_71  
MFE-oss -32.5  
MFE-css -32.5

sseq\_71  
MFE-oss -33.3  
MFE-css -34.2

SeqID 72

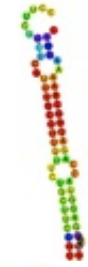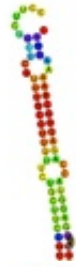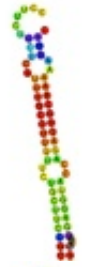

SeqID 73

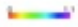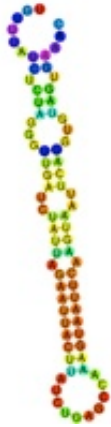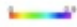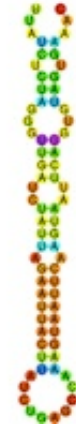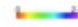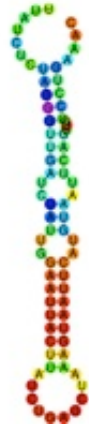

fseq\_73  
MFE-oss -14.9  
MFE-css -14.9

qseq\_73  
MFE-oss -14.9  
MFE-css -14.9

sseq\_73  
MFE-oss -14.2  
MFE-css -11.9

SeqID 75

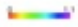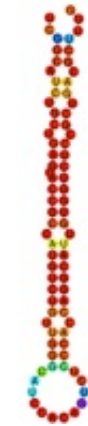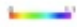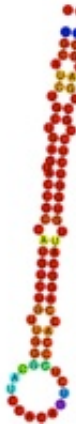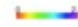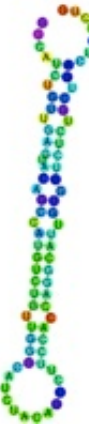

fseq\_75  
MFE-oss -33.5  
MFE-css -33.5

qseq\_75  
MFE-oss -33.2  
MFE-css -33.2

sseq\_75  
MFE-oss -20  
MFE-css -16.84

SeqID 76

SeqID 76

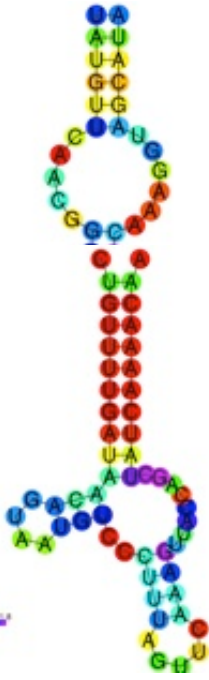

fseq\_77  
MFE-oss -10.8  
MFE-css -9.6

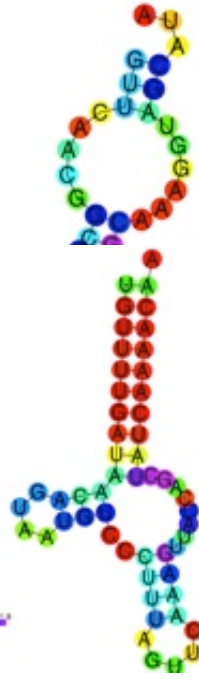

qseq\_77  
MFE-oss -10.7  
MFE-css -9.5

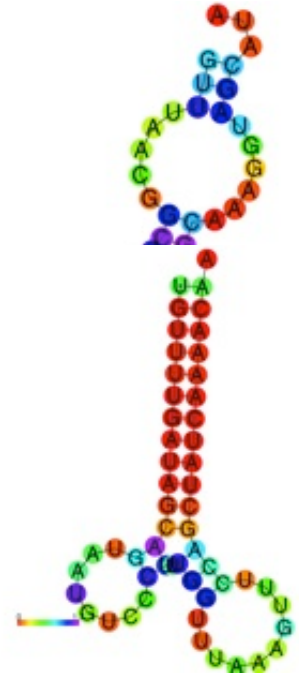

sseq\_77  
MFE-oss -15.3  
MFE-css -14.41

SeqID 77

SeqID 78

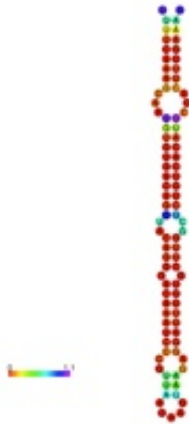

fseq\_78  
MFE-oss -39.4  
MFE-css -39.4

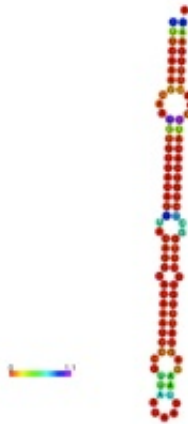

qseq\_78  
MFE-oss -39.2  
MFE-css -39.2

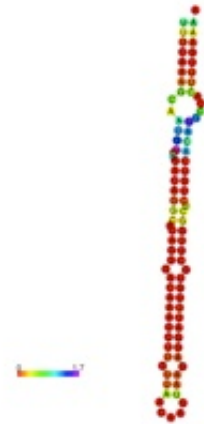

sseq\_78  
MFE-oss -36.6  
MFE-css -36.5

SeqID 79

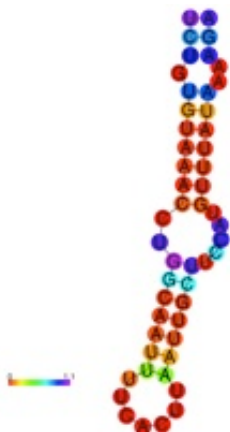

fseq\_79  
MFE-oss -10.2  
MFE-css -10.2

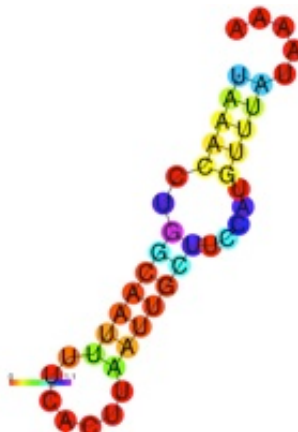

qseq\_79  
MFE-oss -7.1  
MFE-css -7.1

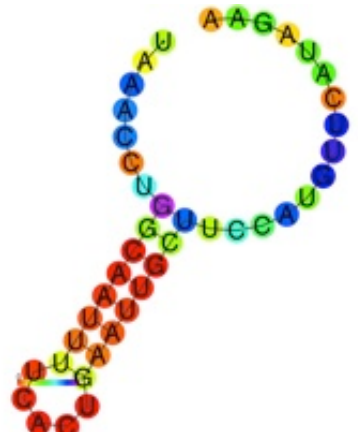

sseq\_79  
MFE-oss -6.8  
MFE-css -6.8

SeqID 80

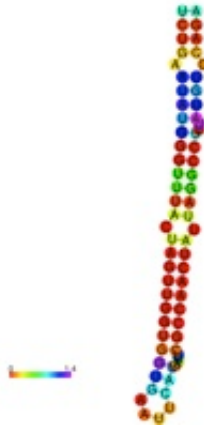

fseq\_80  
MFE-oss -25  
MFE-css -22.3

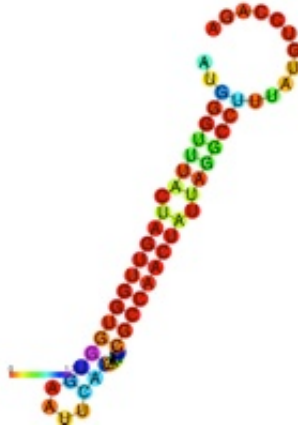

qseq\_80  
MFE-oss -20.1  
MFE-css -18.1

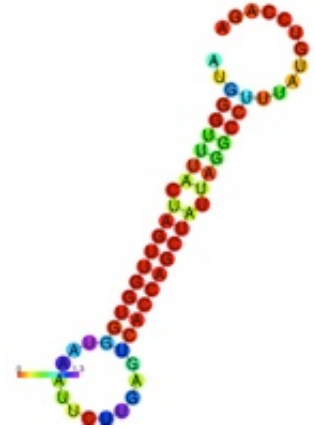

sseq\_80  
MFE-oss -19.8  
MFE-css -19.8

SeqID 81

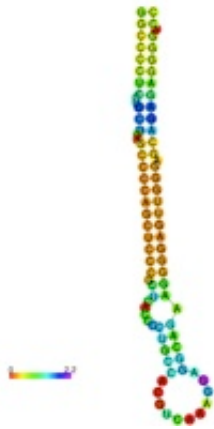

fseq\_81  
MFE-oss -43.7  
MFE-css -41.3

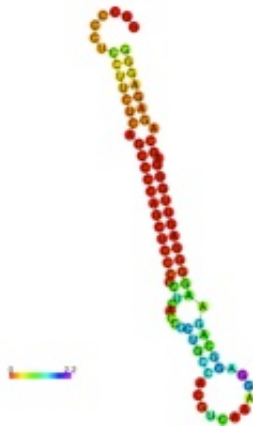

qseq\_81  
MFE-oss -40.4  
MFE-css -40.4

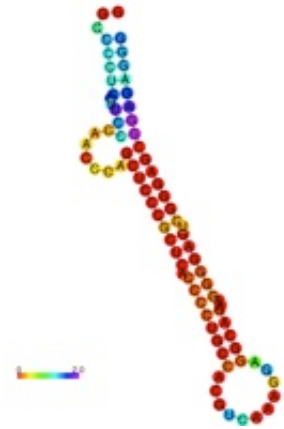

sseq\_81  
MFE-oss -39.31  
MFE-css -33.43

SeqID 82

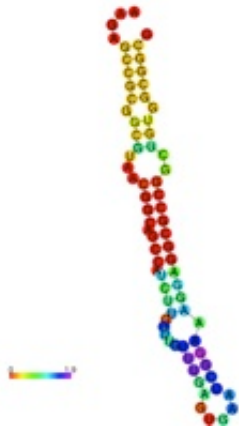

fseq\_82  
MFE-oss -33.1  
MFE-css -29.3

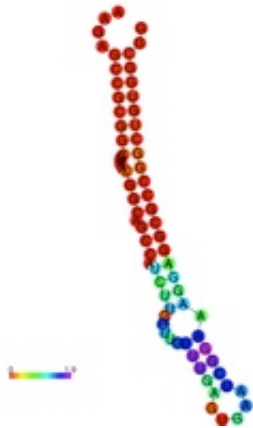

qseq\_82  
MFE-oss -31.5  
MFE-css -27.7

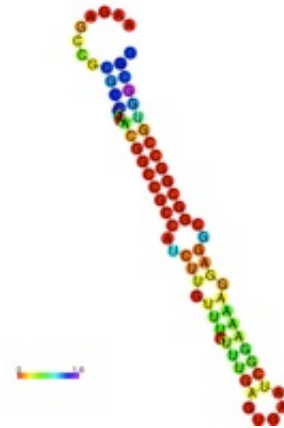

sseq\_82  
MFE-oss -35  
MFE-css -35

SeqID 83

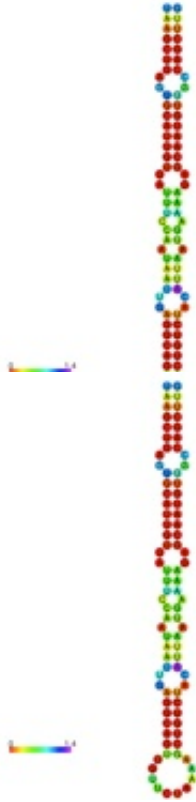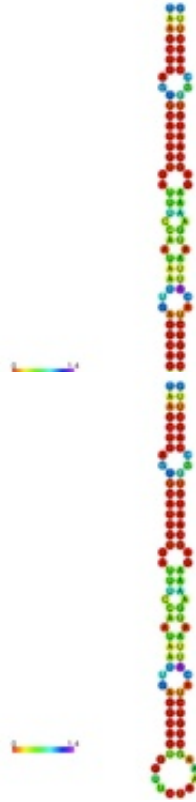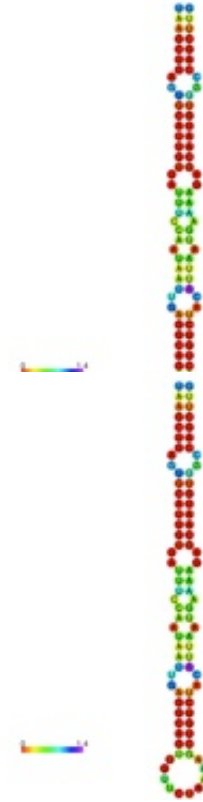

SeqID 84

fseq\_84  
MFE-oss -29.2  
MFE-css -29.2

qseq\_84  
MFE-oss -29.2  
MFE-css -29.2

sseq\_84  
MFE-oss -29.2  
MFE-css -29.2

SeqID 93

fseq\_93  
MFE-oss -36.4  
MFE-css -34.5

qseq\_93  
MFE-oss -36.4  
MFE-css -34.5

sseq\_93  
MFE-oss -32.3  
MFE-css -30.2

SeqID 94

fseq\_94  
MFE-oss -61.7  
MFE-css -50.7

qseq\_94  
MFE-oss -59.9  
MFE-css -55.5

sseq\_94  
MFE-oss -58.4  
MFE-css -48.3



SeqID 95

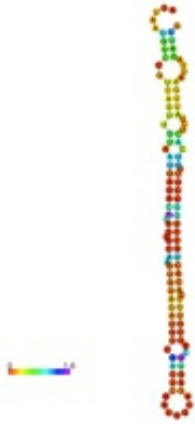

fseq\_95  
MFE-oss -34.5  
MFE-css -34.4

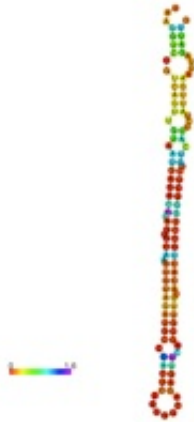

qseq\_95  
MFE-oss -34.5  
MFE-css -34.4

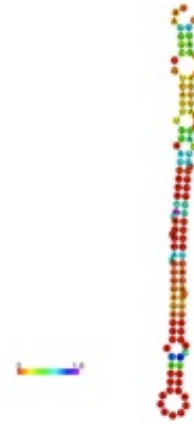

sseq\_95  
MFE-oss -36.2  
MFE-css -36.2

SeqID 96

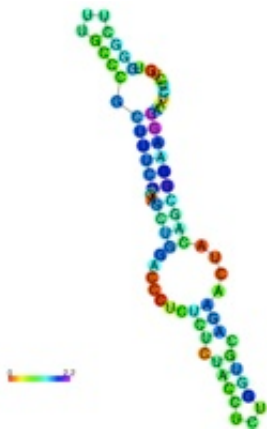

fseq\_96  
MFE-oss -19.6  
MFE-css -10.82

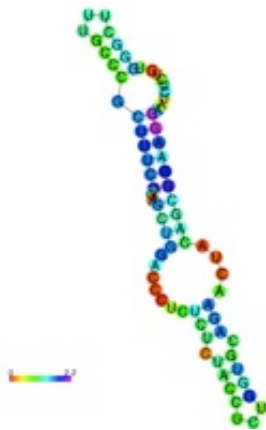

qseq\_96  
MFE-oss -19.6  
MFE-css -10.82

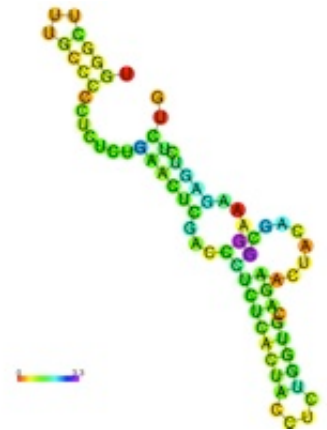

sseq\_96  
MFE-oss -14.8  
MFE-css -9.57

SeqID 97

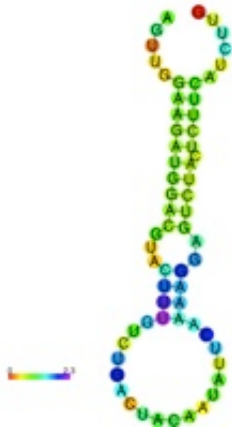

fseq\_97  
MFE-oss -12.57  
MFE-css -10.45

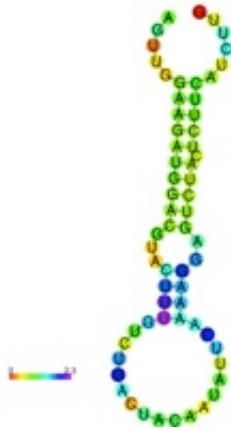

qseq\_97  
MFE-oss -12.57  
MFE-css -10.45

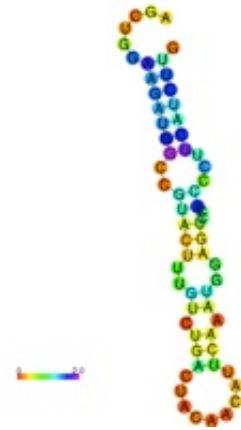

sseq\_97  
MFE-oss -10  
MFE-css -7.32

SeqID 100

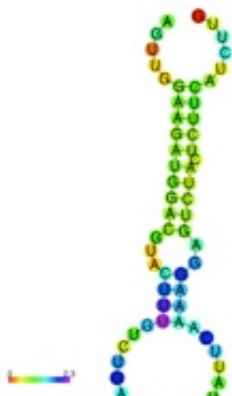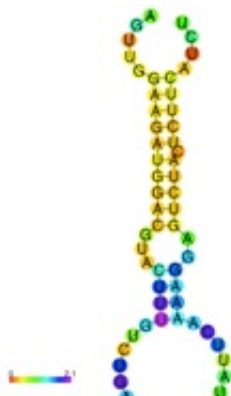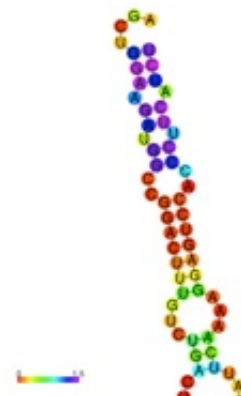

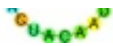

fseq\_100  
 MFE-oss -12.57  
 MFE-css -10.45

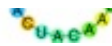

qseq\_100  
 MFE-oss -12.57  
 MFE-css -12.57

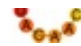

sseq\_100  
 MFE-oss -14  
 MFE-css -13.4

SeqID  
 101

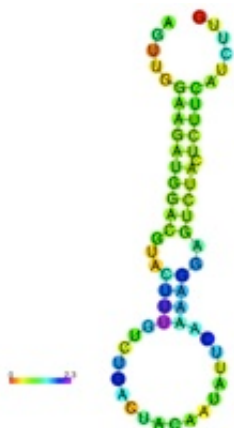

fseq\_101  
 MFE-oss -12.57  
 MFE-css -10.45

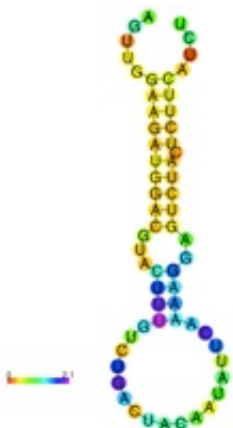

qseq\_101  
 MFE-oss -12.57  
 MFE-css -12.57

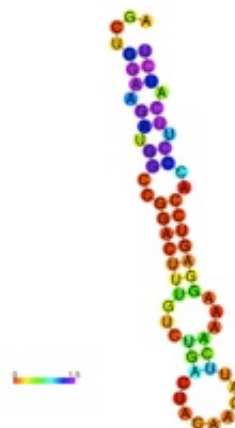

sseq\_101  
 MFE-oss -14  
 MFE-css -13.4

SeqID  
 102

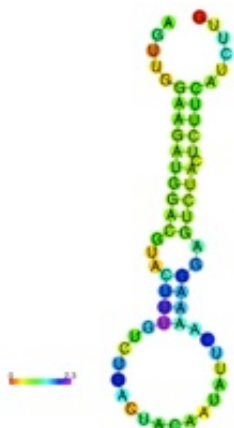

fseq\_102  
 MFE-oss -12.57  
 MFE-css -10.45

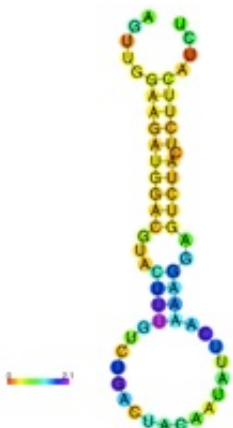

qseq\_102  
 MFE-oss -12.57  
 MFE-css -12.57

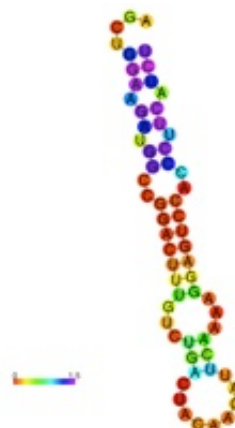

sseq\_102  
 MFE-oss -14  
 MFE-css -13.4

SeqID  
 103

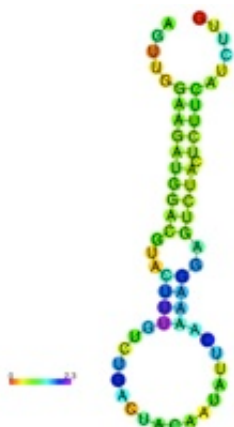

fseq\_103  
 MFE-oss -12.57  
 MFE-css -10.45

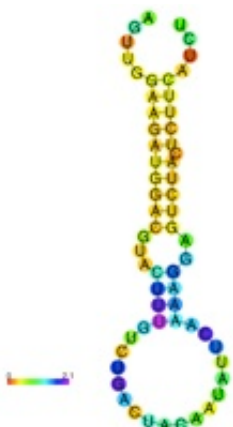

qseq\_103  
 MFE-oss -12.57  
 MFE-css -12.57

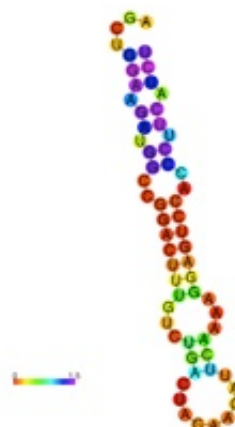

sseq\_103  
 MFE-oss -14  
 MFE-css -13.4

SeqID  
104

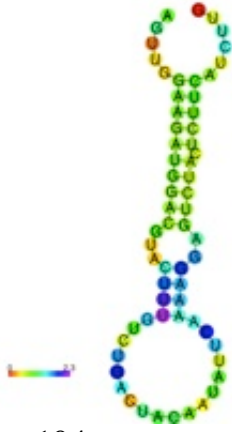

fseq\_104  
MFE-oss -12.57  
MFE-css -10.45

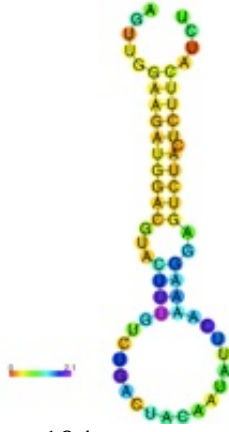

qseq\_104  
MFE-oss -12.57  
MFE-css -12.57

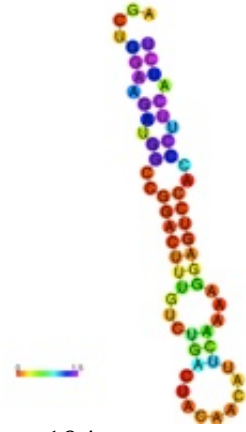

sseq\_104  
MFE-oss -14  
MFE-css -13.4

SeqID  
105

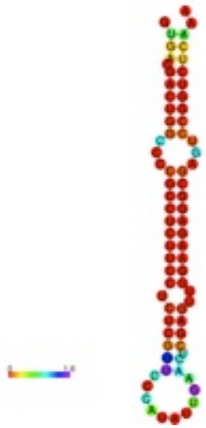

fseq\_105  
MFE-oss -36.1  
MFE-css -35.4

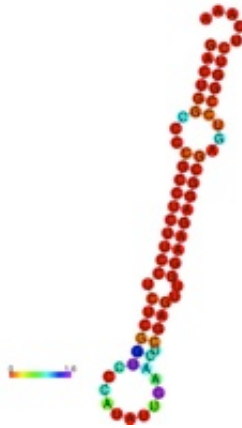

qseq\_105  
MFE-oss -34  
MFE-css -33.3

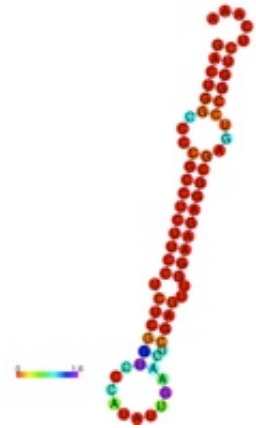

sseq\_105  
MFE-oss -34  
MFE-css -33.3

SeqID  
110

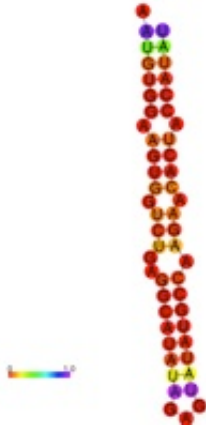

fseq\_110  
MFE-oss -23  
MFE-css -23

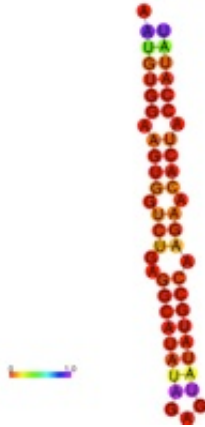

qseq\_110  
MFE-oss -23  
MFE-css -23

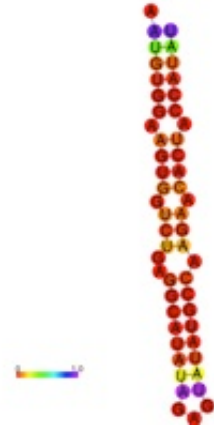

sseq\_110  
MFE-oss -23  
MFE-css -23

SeqID  
111

SeqID  
112

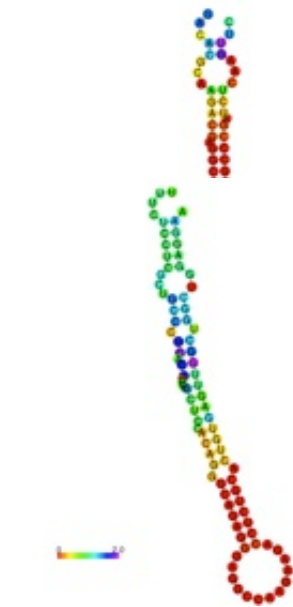

fseq\_112  
MFE-oss -38.02  
MFE-css -36.72

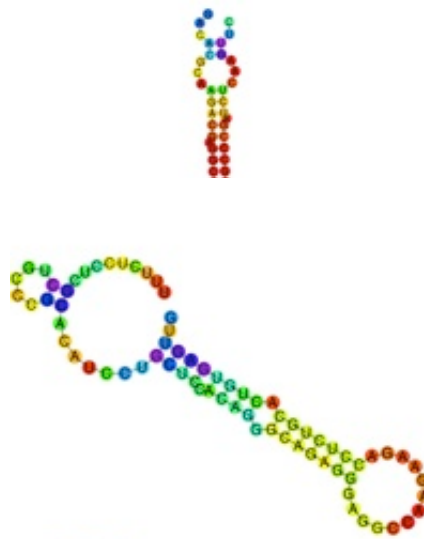

qseq\_112  
MFE-oss -23.32  
MFE-css -15.62

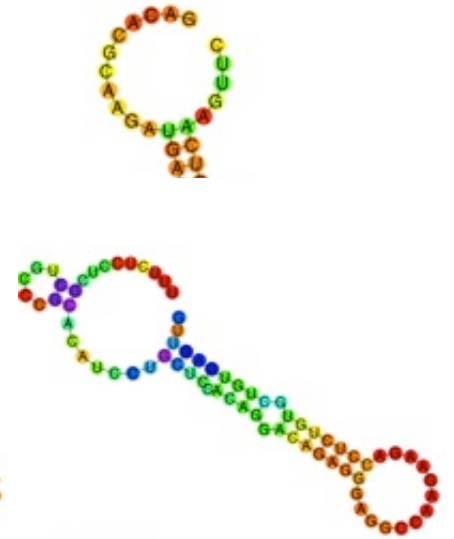

sseq\_112  
MFE-oss -23.52  
MFE-css -14.62

SeqID  
113

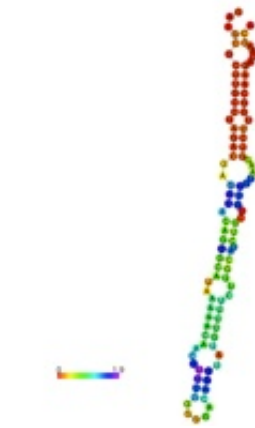

fseq\_113  
MFE-oss -33.2  
MFE-css -27.19

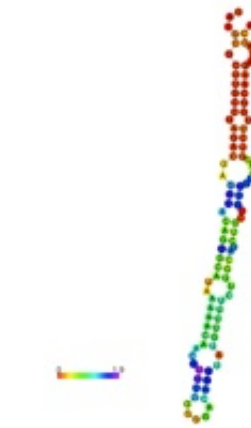

qseq\_113  
MFE-oss -33.2  
MFE-css -27.19

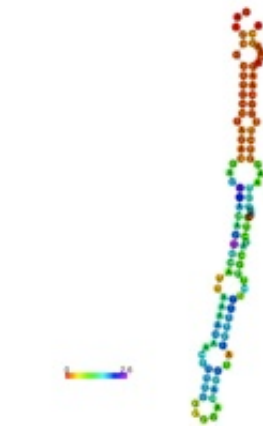

sseq\_113  
MFE-oss -32.1  
MFE-css -24.6

SeqID  
115

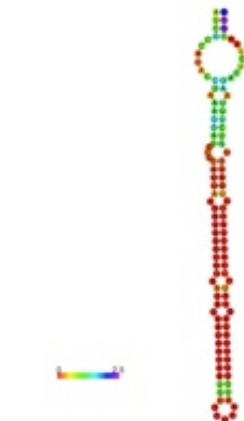

fseq\_115  
MFE-oss -40.32  
MFE-css -40.2

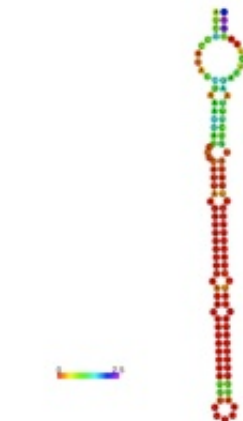

qseq\_115  
MFE-oss -40.32  
MFE-css -40.2

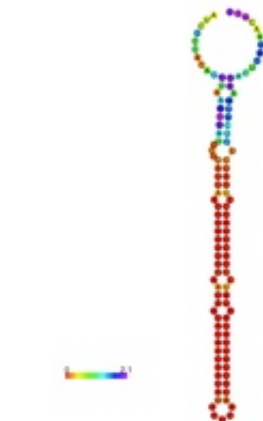

sseq\_115  
MFE-oss -41.2  
MFE-css -37.8

MFE-oss 10.2

MFE-oss 10.2

MFE-oss 10.2

SeqID  
116

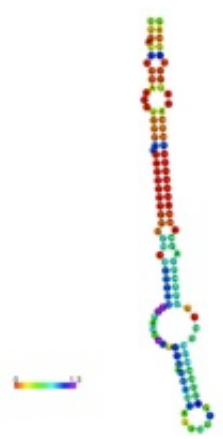

fseq\_116  
MFE-oss -50.32  
MFE-oss -50.32

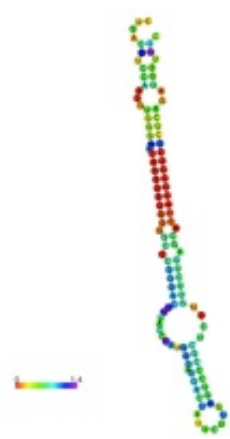

qseq\_116  
MFE-oss -47.42  
MFE-oss -47.42

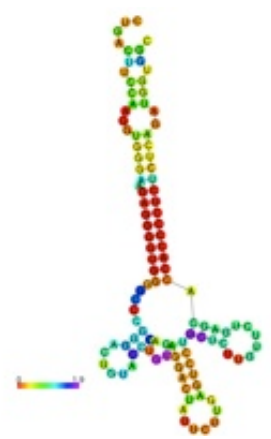

sseq\_116  
MFE-oss -46.2  
MFE-oss -46.2

SeqID  
117

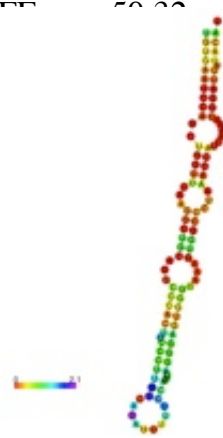

fseq\_117  
MFE-oss -37.4  
MFE-oss -37.4  
MFE-oss -37.5

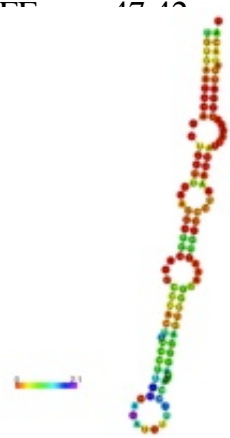

qseq\_117  
MFE-oss -37.4  
MFE-oss -37.4  
MFE-oss -37.5

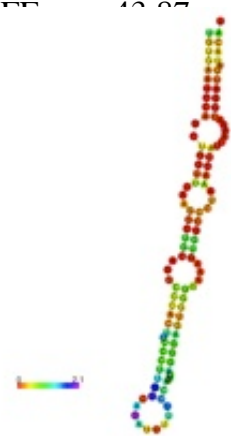

sseq\_117  
MFE-oss -37.4  
MFE-oss -37.4  
MFE-oss -37.5

SeqID  
118

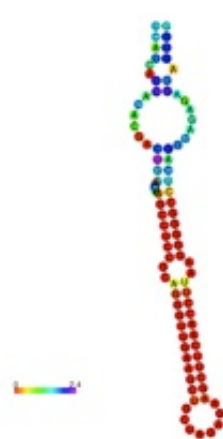

fseq\_118  
MFE-oss -40.02  
MFE-oss -40.02  
MFE-oss -35

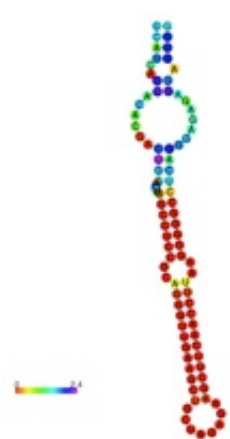

qseq\_118  
MFE-oss -40.02  
MFE-oss -40.02  
MFE-oss -35

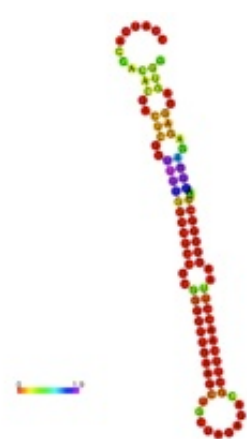

sseq\_118  
MFE-oss -41.3  
MFE-oss -41.3  
MFE-oss -38.8

SeqID  
119

SeqID  
121

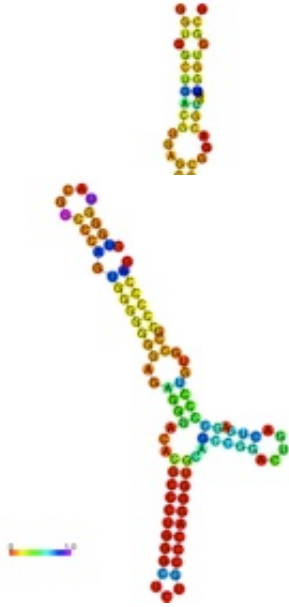

fseq\_121  
MFE-oss -50.8  
MFE-css -50.8

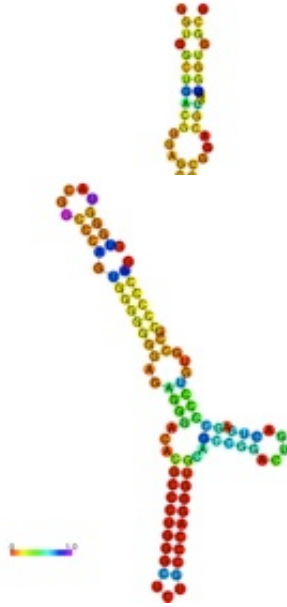

qseq\_121  
MFE-oss -50.8  
MFE-css -50.8

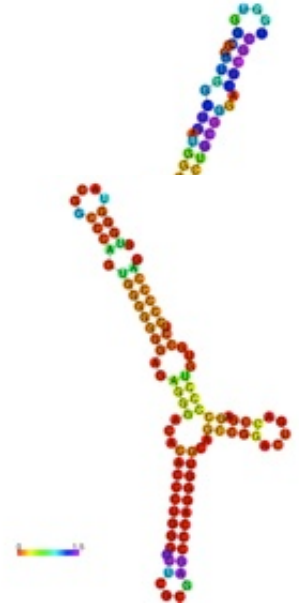

sseq\_121  
MFE-oss -53  
MFE-css -51.6

SeqID  
122

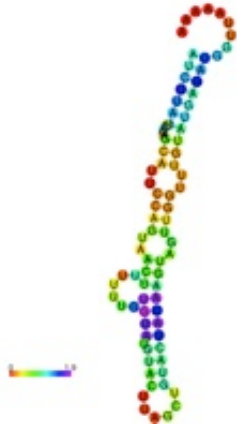

fseq\_122  
MFE-oss -16.7  
MFE-css -13.5

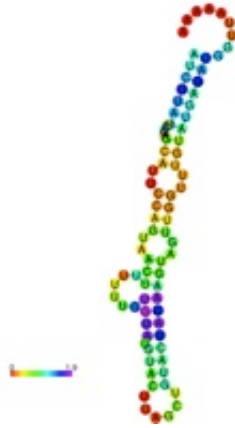

qseq\_122  
MFE-oss -16.7  
MFE-css -13.5

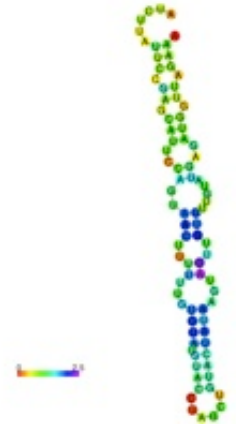

sseq\_122  
MFE-oss -13.2  
MFE-css -9.74

SeqID  
123

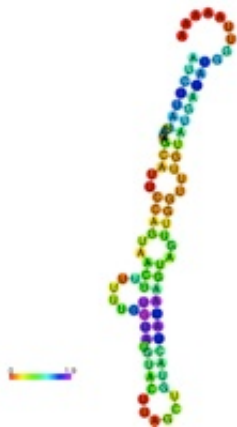

fseq\_123  
MFE-oss -16.7  
MFE-css -13.5

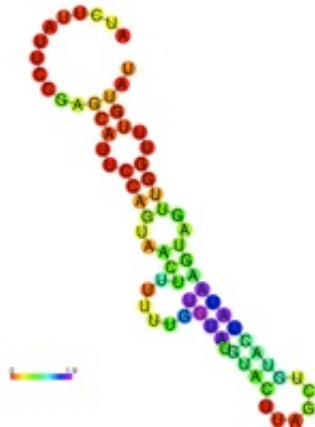

qseq\_123  
MFE-oss -13  
MFE-css -12.9

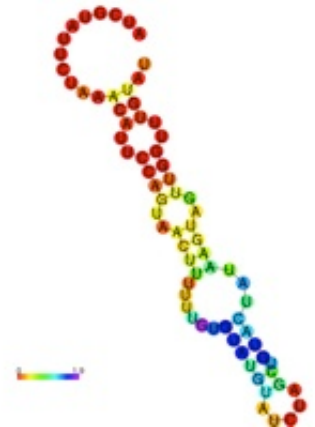

sseq\_123  
MFE-oss -11.4  
MFE-css -11.4

SeqID  
124

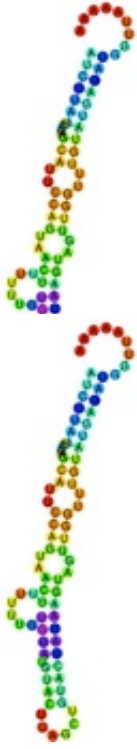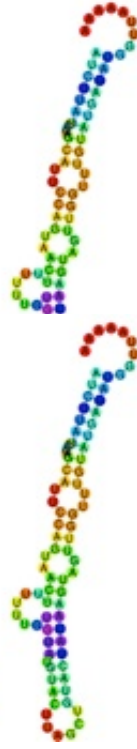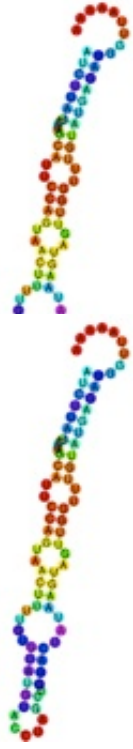

SeqID  
125  
fseq\_125  
MFE-oss -16.7  
MFE-css -13.5

qseq\_125  
MFE-oss -16.7  
MFE-css -13.5

sseq\_125  
MFE-oss -16.6  
MFE-css -12.7

SeqID  
126

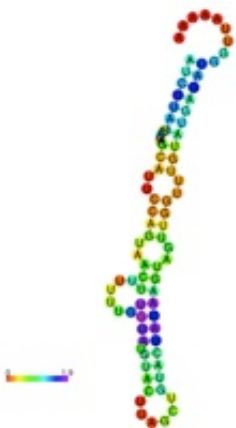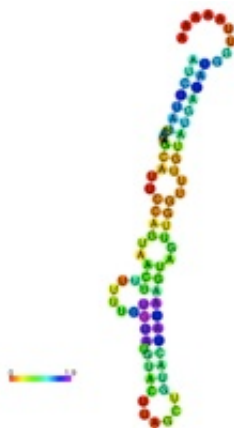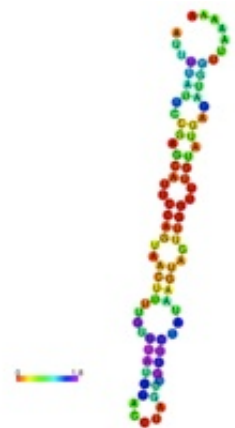

fseq\_126  
MFE-oss -16.7  
MFE-css -13.5

qseq\_126  
MFE-oss -16.7  
MFE-css -13.5

sseq\_126  
MFE-oss -16  
MFE-css -12.89

SeqID  
127

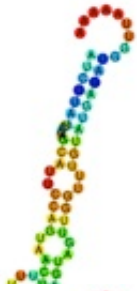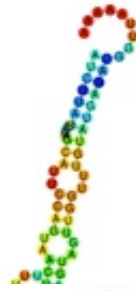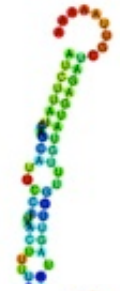

SeqID  
128

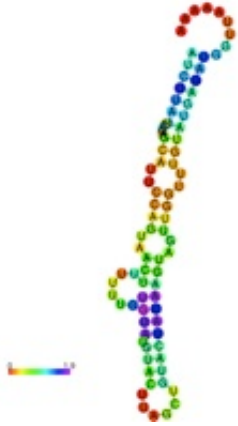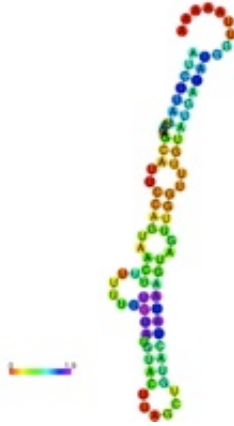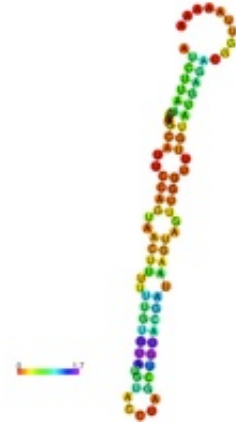

fseq\_128  
MFE-oss -16.7  
MFE-css -13.5

qseq\_128  
MFE-oss -16.7  
MFE-css -13.5

sseq\_128  
MFE-oss -16.3  
MFE-css -14.9

SeqID  
129

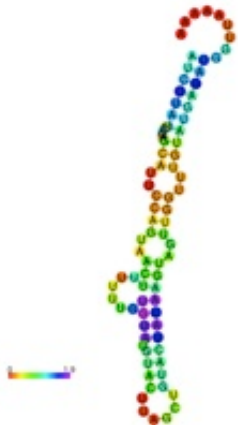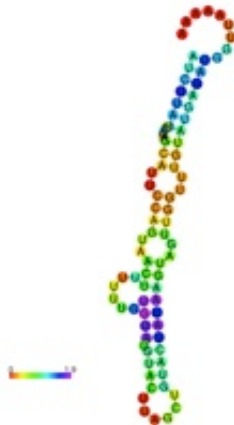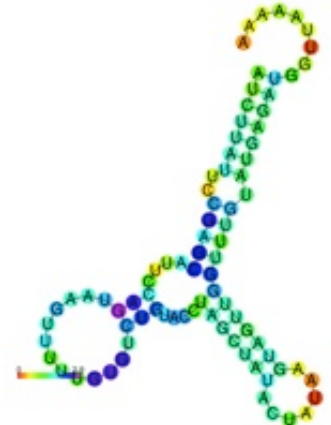

fseq\_129  
MFE-oss -16.7  
MFE-css -13.5

qseq\_129  
MFE-oss -16.7  
MFE-css -13.5

sseq\_129  
MFE-oss -13.32  
MFE-css -3.95

SeqID  
130



SeqID  
132

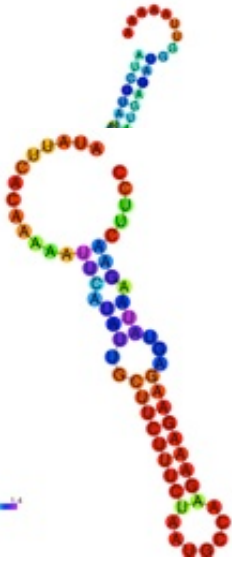

fseq\_132  
MFE-oss -12.1  
MFE-css -10.5

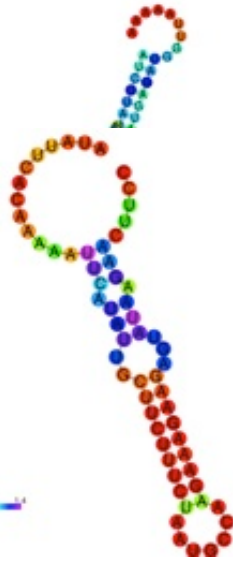

qseq\_132  
MFE-oss -12.1  
MFE-css -10.5

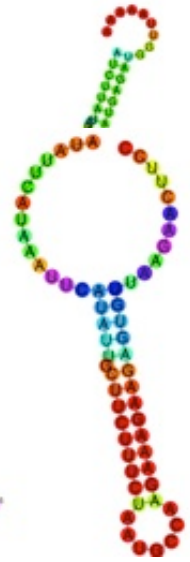

sseq\_132  
MFE-oss -11.3  
MFE-css -11.3

SeqID  
133

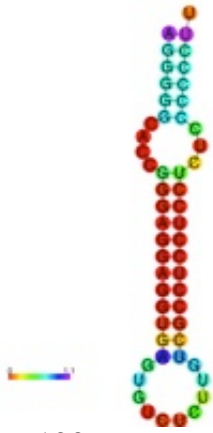

fseq\_133  
MFE-oss -32.5  
MFE-css -32.5

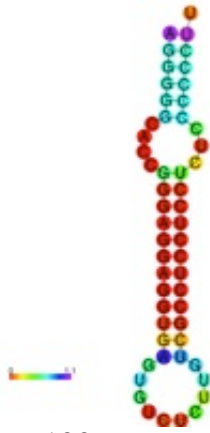

qseq\_133  
MFE-oss -32.5  
MFE-css -32.5

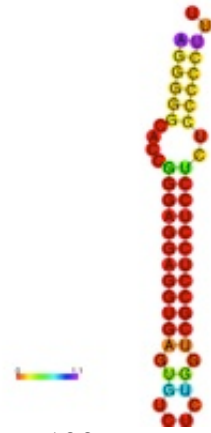

sseq\_133  
MFE-oss -33.3  
MFE-css -34.2

SeqID  
134

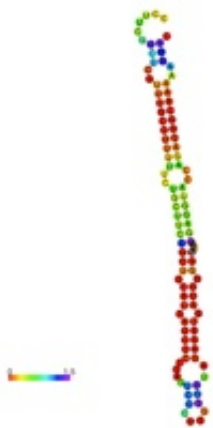

fseq\_134  
MFE-oss -39.4  
MFE-css -39.4

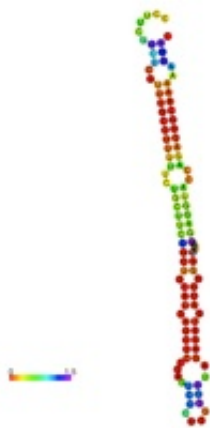

qseq\_134  
MFE-oss -39.4  
MFE-css -39.4

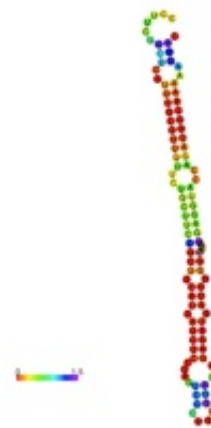

sseq\_134  
MFE-oss -39.4  
MFE-css -39.4



MFE-css -39.4

MFE-css -39.2

MFE-css -36.5

SeqID  
140

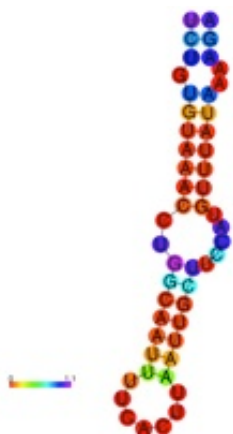

fseq\_140  
MFE-oss -10.2  
MFE-css -10.2

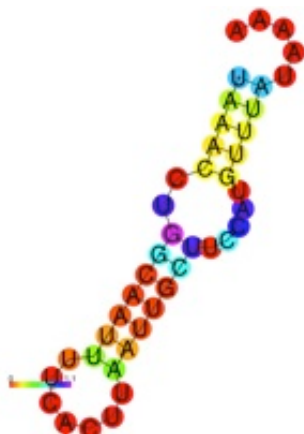

qseq\_140  
MFE-oss -7.1  
MFE-css -7.1

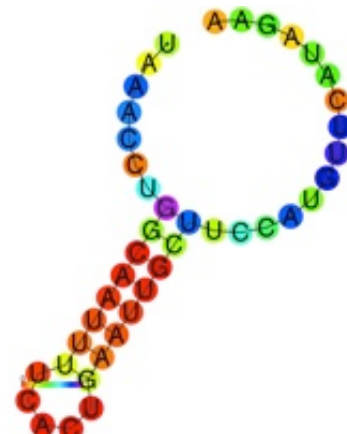

sseq\_140  
MFE-oss -6.8  
MFE-css -6.8

SeqID  
141

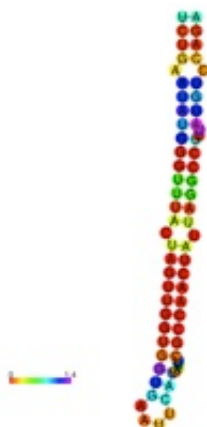

fseq\_141  
MFE-oss -25  
MFE-css -22.3

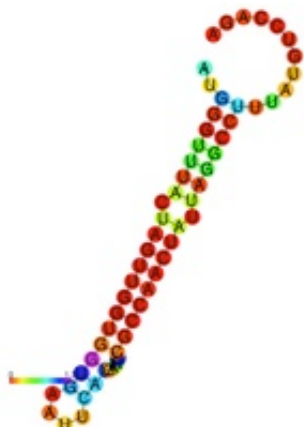

qseq\_141  
MFE-oss -20.1  
MFE-css -18.1

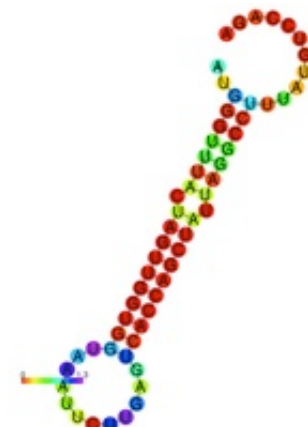

sseq\_141  
MFE-oss -19.8  
MFE-css -19.8

SeqID  
142

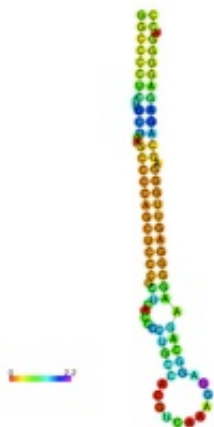

fseq\_142  
MFE-oss -43.7  
MFE-css -41.3

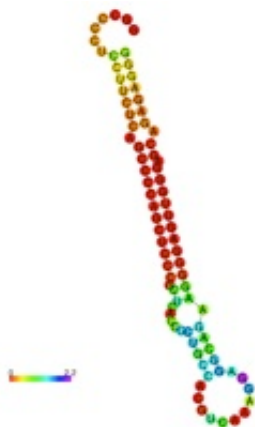

qseq\_142  
MFE-oss -40.4  
MFE-css -40.4

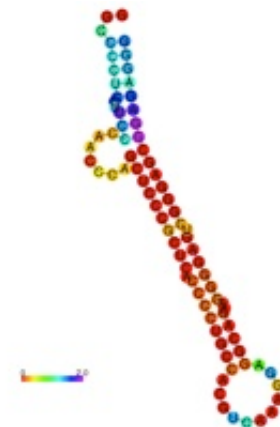

sseq\_142  
MFE-oss -39.31  
MFE-css -33.43

SeqID  
143

SeqID  
**148**

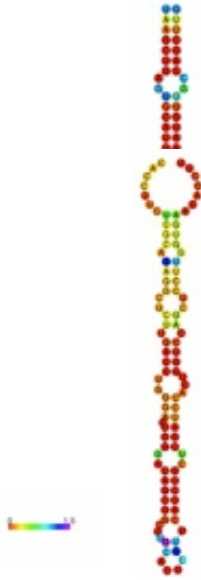

fseq\_148  
MFE-oss -36.4  
MFE-css -34.5

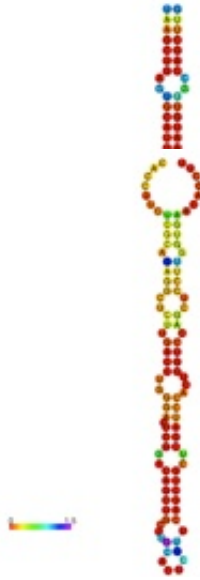

qseq\_148  
MFE-oss -36.4  
MFE-css -34.5

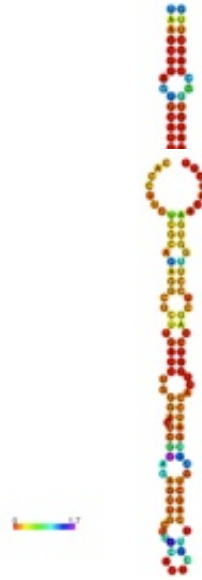

sseq\_148  
MFE-oss -32.3  
MFE-css -30.2

SeqID  
**149**

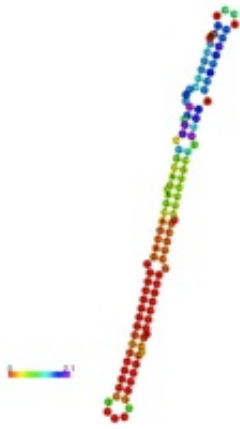

fseq\_149  
MFE-oss -61.7  
MFE-css -50.7

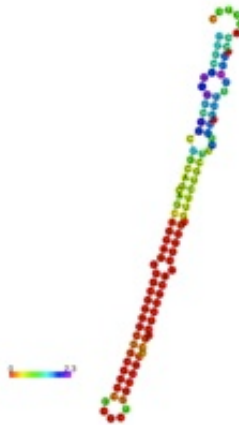

qseq\_149  
MFE-oss -59.9  
MFE-css -55.5

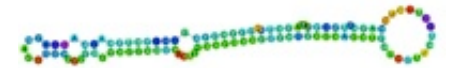

sseq\_149  
MFE-oss -58.06  
MFE-css -34.43

SeqID  
**150**

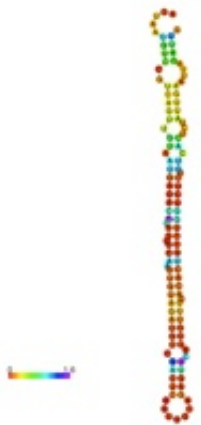

fseq\_150  
MFE-oss -34.5  
MFE-css -34.4

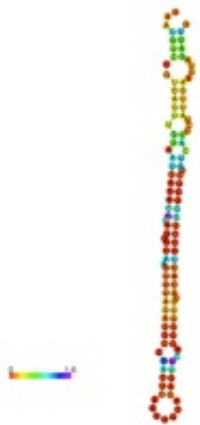

qseq\_150  
MFE-oss -34.5  
MFE-css -34.4

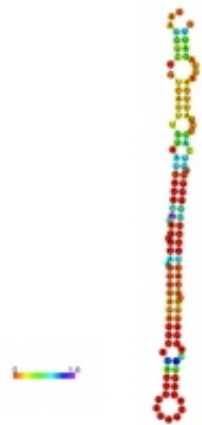

sseq\_150  
MFE-oss -36.2  
MFE-css -36.2

SeqID  
151

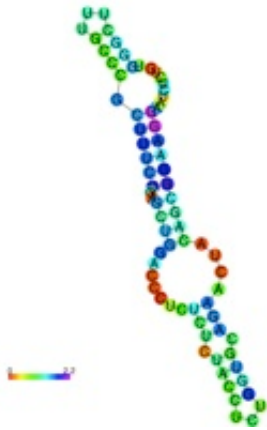

fseq\_151  
MFE-oss -19.6  
MFE-css -10.82

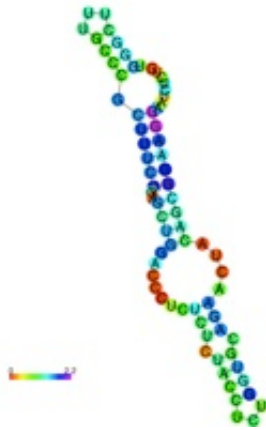

qseq\_151  
MFE-oss -19.6  
MFE-css -10.82

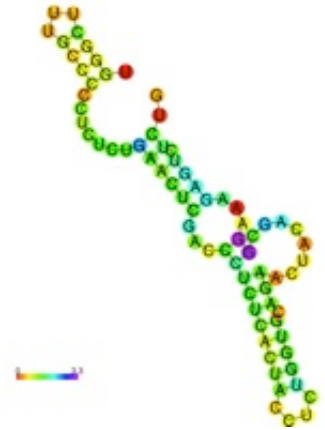

sseq\_151  
MFE-oss -14.8  
MFE-css -9.57

SeqID  
152

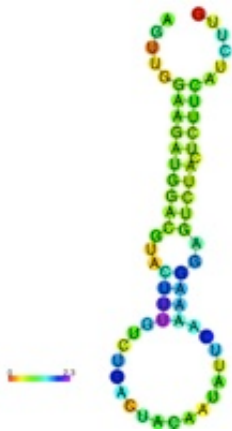

fseq\_152  
MFE-oss -12.57  
MFE-css -10.45

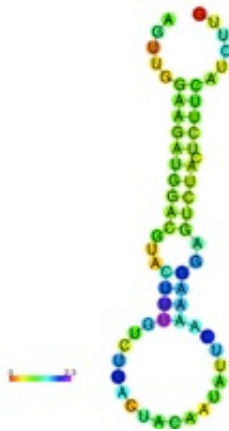

qseq\_152  
MFE-oss -12.57  
MFE-css -10.45

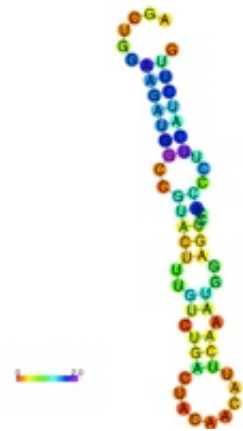

sseq\_152  
MFE-oss -10  
MFE-css -7.32

SeqID  
153

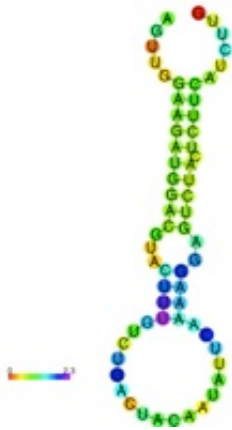

fseq\_153  
MFE-oss -12.57  
MFE-css -10.45

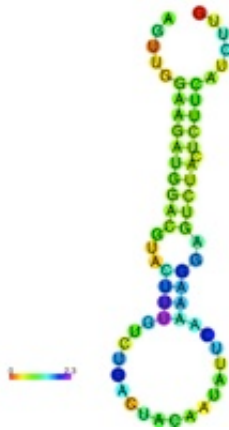

qseq\_153  
MFE-oss -12.57  
MFE-css -10.45

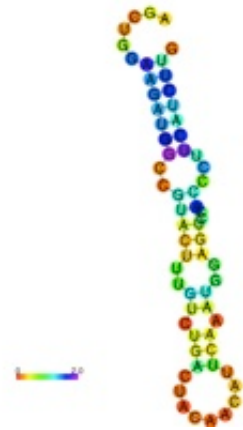

sseq\_153  
MFE-oss -10  
MFE-css -7.32

SeqID  
154

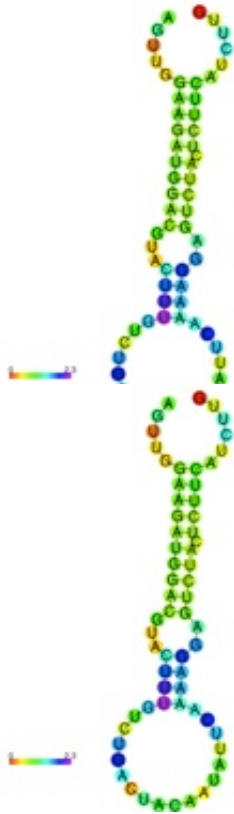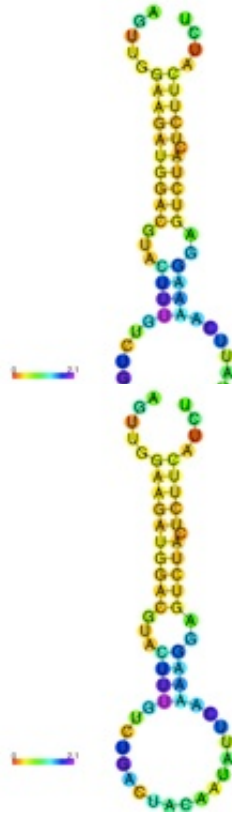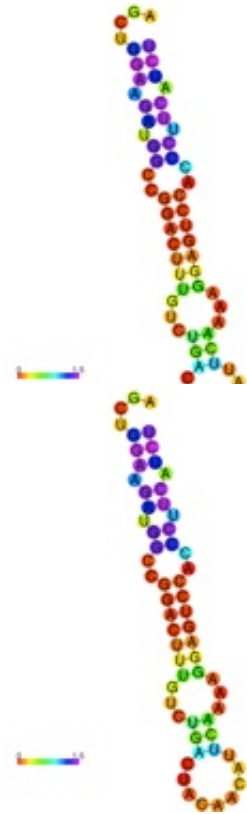

SeqID  
156

fseq\_156  
MFE-oss -12.57  
MFE-css -10.45

qseq\_156  
MFE-oss -12.57  
MFE-css -12.57

sseq\_156  
MFE-oss -14  
MFE-css -13.4

SeqID  
157

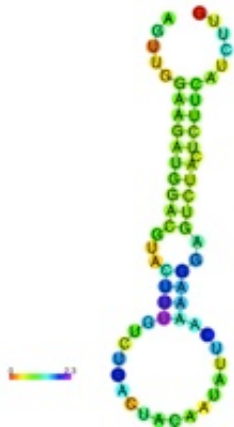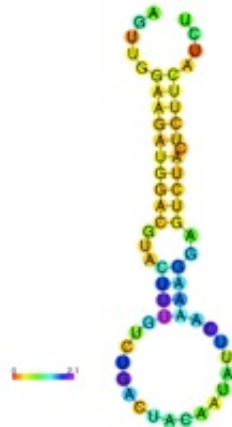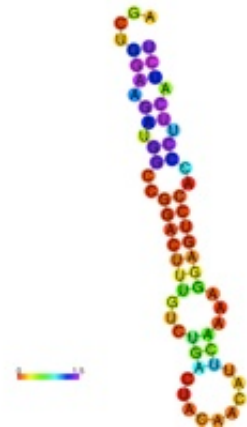

fseq\_157  
MFE-oss -12.57  
MFE-css -10.45

qseq\_157  
MFE-oss -12.57  
MFE-css -12.57

sseq\_157  
MFE-oss -14  
MFE-css -13.4

SeqID  
158

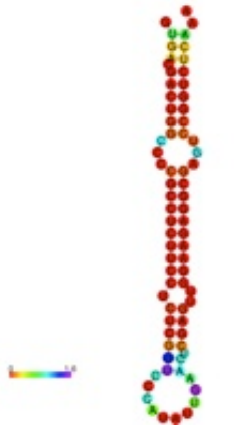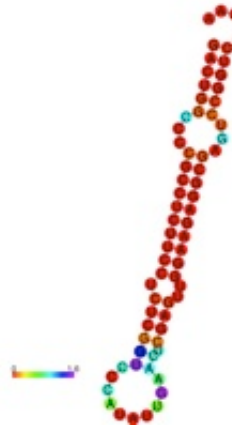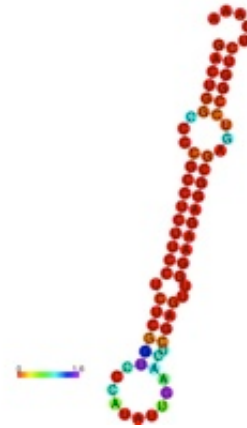

fseq\_158  
MFE-oss -36.1  
MFE-css -22.4

qseq\_158  
MFE-oss -34  
MFE-css -22.2

sseq\_158  
MFE-oss -34  
MFE-css -22.2

MFE-css -35.4

MFE-css -33.3

MFE-css -33.3

SeqID  
163

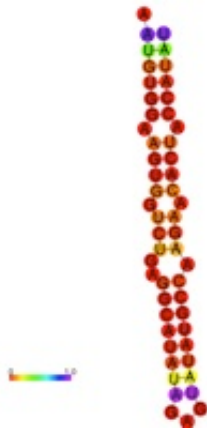

fseq\_163  
MFE-oss -23  
MFE-css -23



qseq\_163  
MFE-oss -23  
MFE-css -23

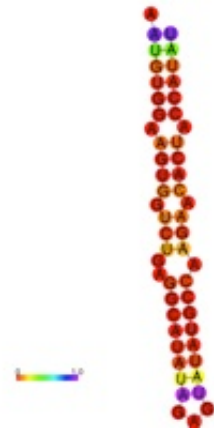

sseq\_163  
MFE-oss -23  
MFE-css -23

SeqID  
164

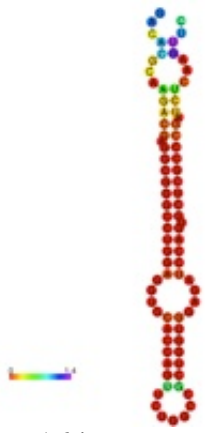

fseq\_164  
MFE-oss -37.4  
MFE-css -37.4

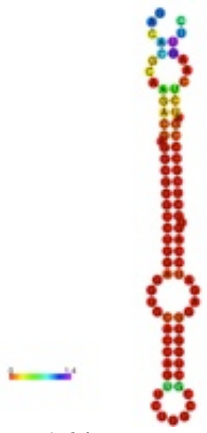

qseq\_164  
MFE-oss -37.4  
MFE-css -37.4

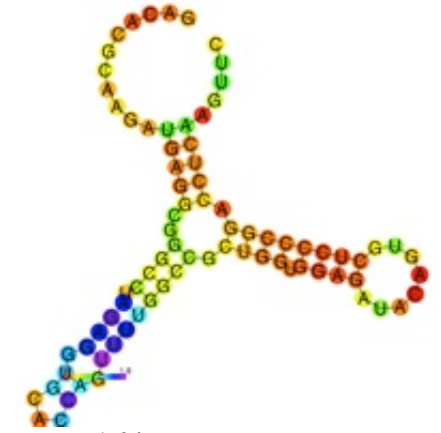

sseq\_164  
MFE-oss -27.2  
MFE-css -26.4

SeqID  
165

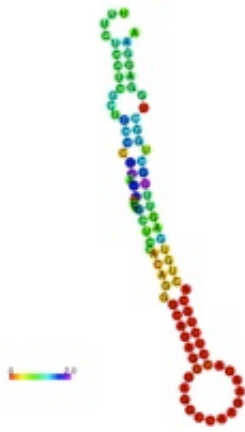

fseq\_165  
MFE-oss -38.02  
MFE-css -36.72

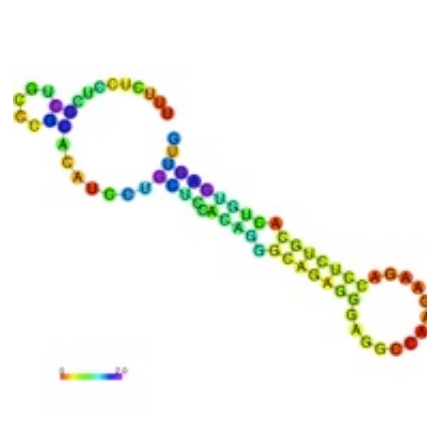

qseq\_165  
MFE-oss -23.32  
MFE-css -15.62

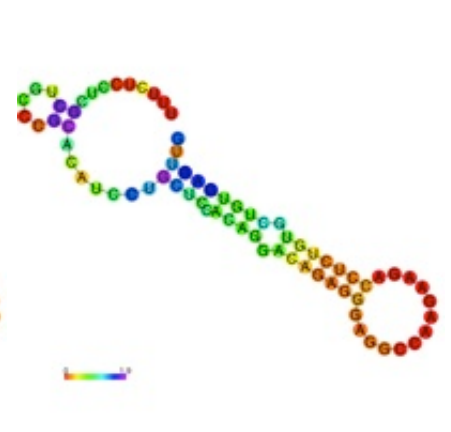

sseq\_165  
MFE-oss -23.52  
MFE-css -14.62

SeqID  
166

SeqID  
**168**

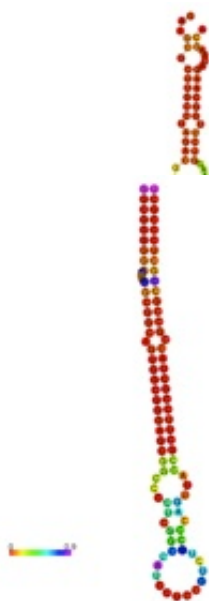

fseq\_168  
MFE-oss -61.4  
MFE-css -61.4

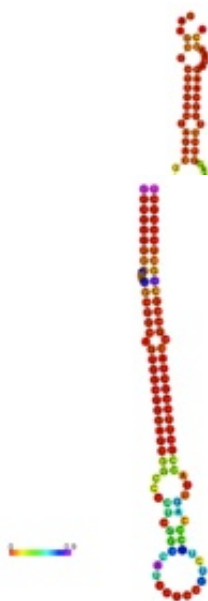

qseq\_168  
MFE-oss -61.4  
MFE-css -61.4

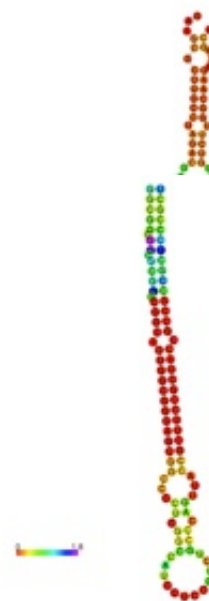

sseq\_168  
MFE-oss -55.6  
MFE-css -49.7

SeqID  
**169**

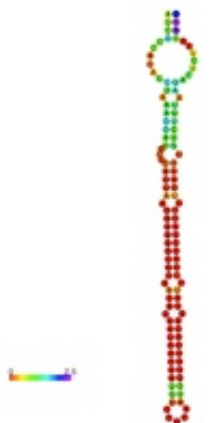

fseq\_169  
MFE-oss -40.32  
MFE-css -40.2

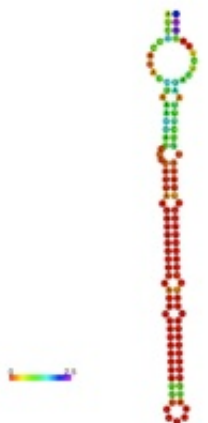

qseq\_169  
MFE-oss -40.32  
MFE-css -40.2

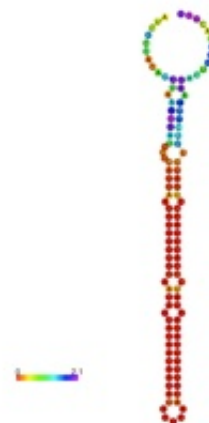

sseq\_169  
MFE-oss -41.2  
MFE-css -37.8

SeqID  
**170**

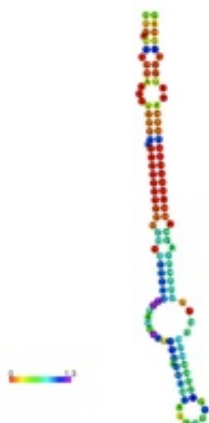

fseq\_170  
MFE-oss -50.32  
MFE-css -50.32

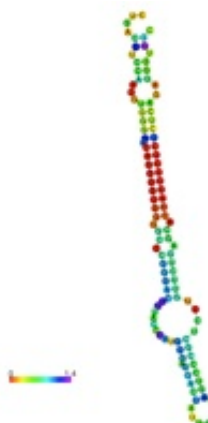

qseq\_170  
MFE-oss -47.42  
MFE-css -47.42

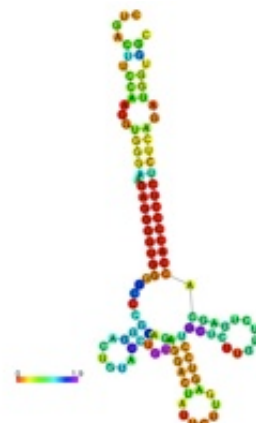

sseq\_170  
MFE-oss -46.2  
MFE-css -43.87



SeqID  
171

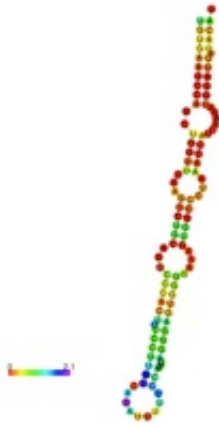

fseq\_171  
MFE-oss -37.4  
MFE-css -37.5

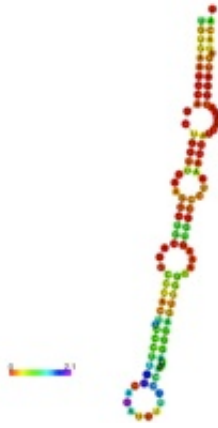

qseq\_171  
MFE-oss -37.4  
MFE-css -37.5

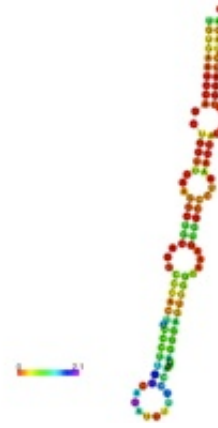

sseq\_171  
MFE-oss -37.4  
MFE-css -37.5

SeqID  
173

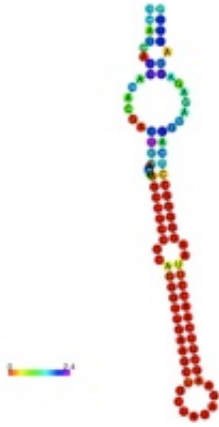

fseq\_173  
MFE-oss -40.02  
MFE-css -35

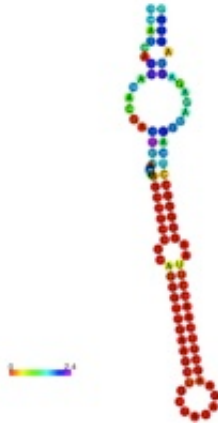

qseq\_173  
MFE-oss -40.02  
MFE-css -35

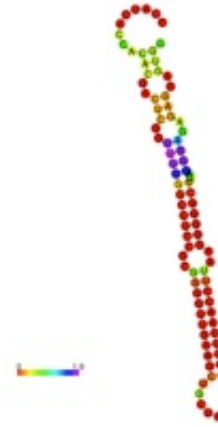

sseq\_173  
MFE-oss -41.3  
MFE-css -38.8

SeqID  
174

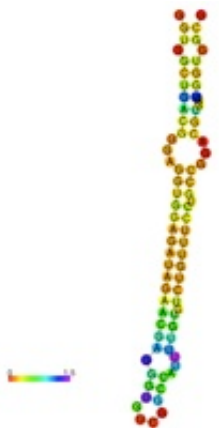

fseq\_174  
MFE-oss -28  
MFE-css -28

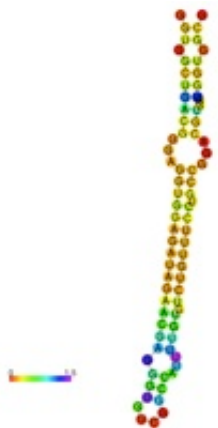

qseq\_174  
MFE-oss -28  
MFE-css -28

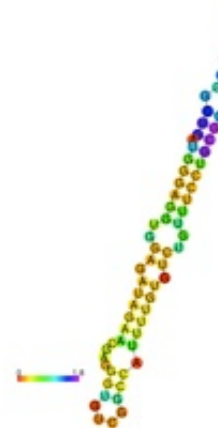

sseq\_174  
MFE-oss -25.9  
MFE-css -17.93

SeqID

176

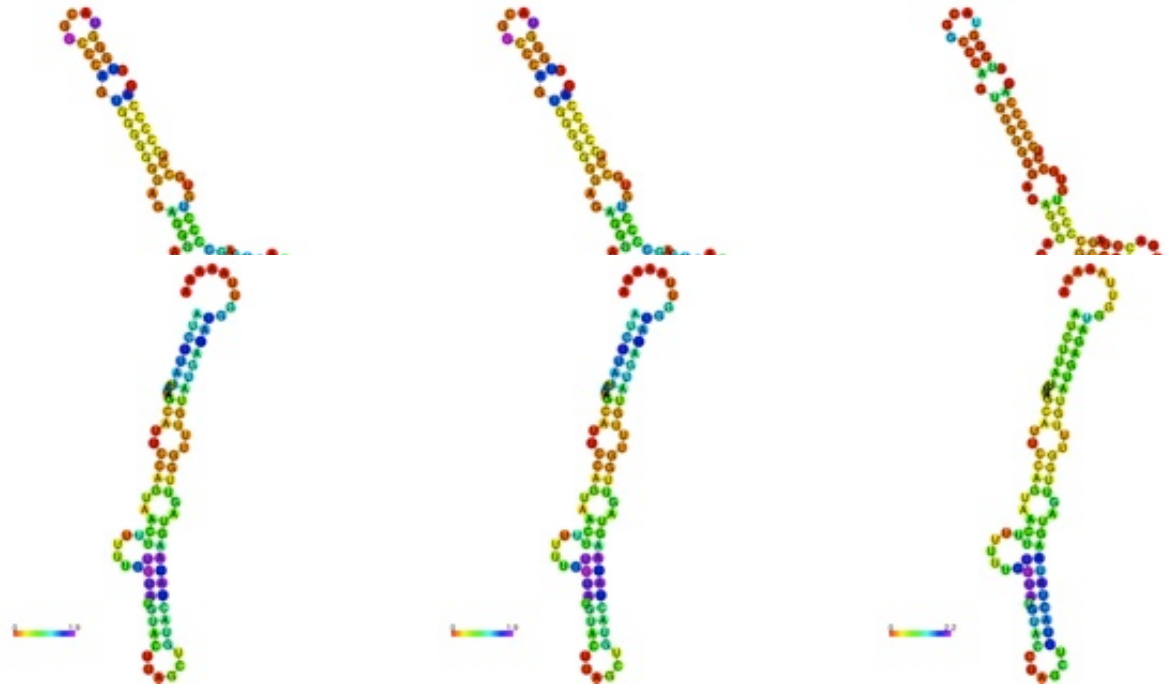

SeqID

177

fseq\_177  
MFE-oss -16.7  
MFE-css -13.5

qseq\_177  
MFE-oss -16.7  
MFE-css -13.5

sseq\_177  
MFE-oss -15.31  
MFE-css -12.94

SeqID

178

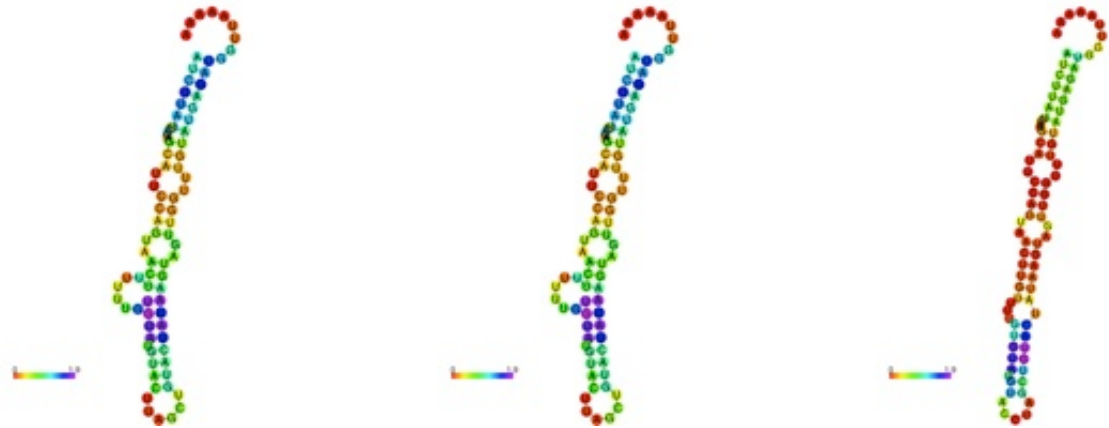

fseq\_178  
MFE-oss -16.7  
MFE-css -13.5

qseq\_178  
MFE-oss -16.7  
MFE-css -13.5

sseq\_178  
MFE-oss -17.7  
MFE-css -16

SeqID

179

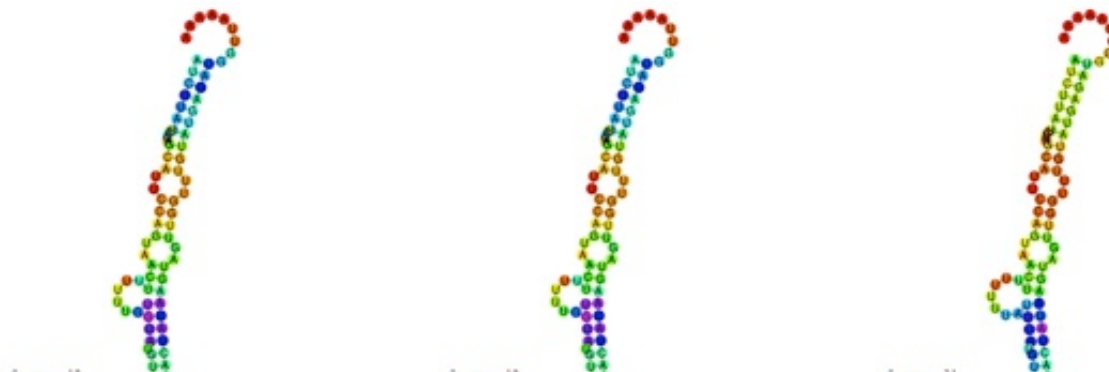



fseq\_179  
MFE-oss -16.7  
MFE-css -13.5



qseq\_179  
MFE-oss -16.7  
MFE-css -13.5



sseq\_179  
MFE-oss -15.31  
MFE-css -14.64

SeqID  
180

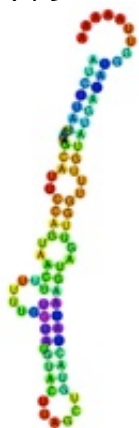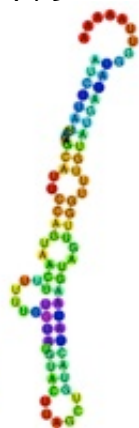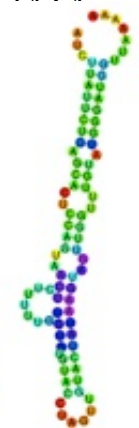

fseq\_180  
MFE-oss -16.7  
MFE-css -13.5



qseq\_180  
MFE-oss -16.7  
MFE-css -13.5



sseq\_180  
MFE-oss -16.01  
MFE-css -14.3

SeqID  
181

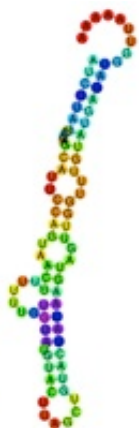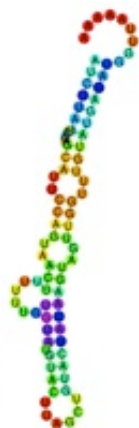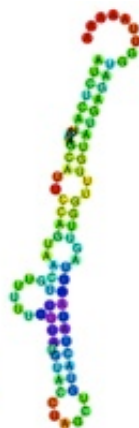

fseq\_181  
MFE-oss -16.7  
MFE-css -13.5



qseq\_181  
MFE-oss -16.7  
MFE-css -13.5



sseq\_181  
MFE-oss -17.51  
MFE-css -13.57

SeqID  
182

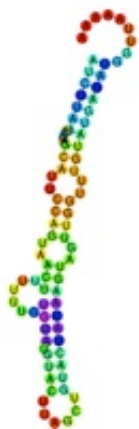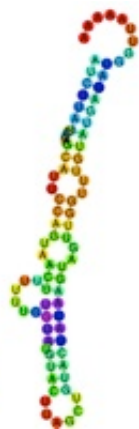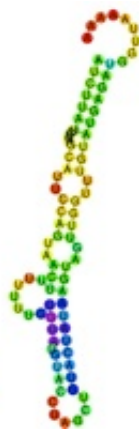

fseq\_182  
MFE-oss -16.7  
MFE-css -13.5



qseq\_182  
MFE-oss -16.7  
MFE-css -13.5



sseq\_182  
MFE-oss -15.31  
MFE-css -12.94

SeqID  
183

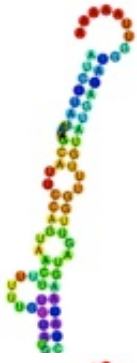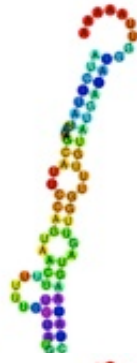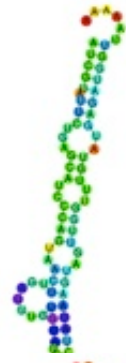

SeqID  
184

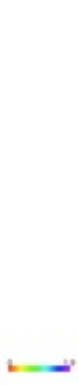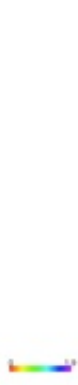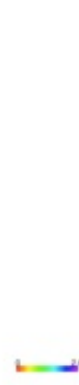

fseq\_184  
MFE-oss -16.7  
MFE-css -13.5

qseq\_184  
MFE-oss -16.7  
MFE-css -13.5

sseq\_184  
MFE-oss -11.3  
MFE-css 1.25

SeqID  
185

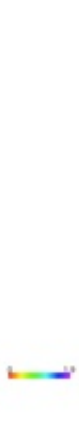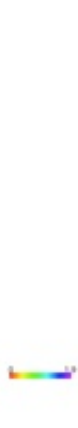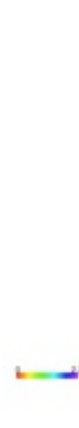

fseq\_185  
MFE-oss -16.7  
MFE-css -13.5

qseq\_185  
MFE-oss -16.7  
MFE-css -13.5

sseq\_185  
MFE-oss -18.51  
MFE-css -12.91

SeqID  
186

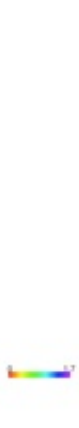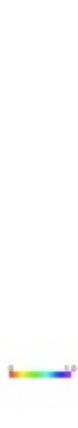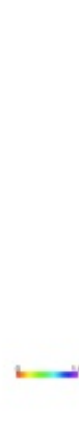

fseq\_186  
MFE-oss -34.4  
MFE-css -24.4

qseq\_186  
MFE-oss -34.4  
MFE-css -24.4

sseq\_186  
MFE-oss -33.6  
MFE-css -23.6

MFE-css -34.4

MFE-css -34.4

MFE-css -33.6

SeqID  
187

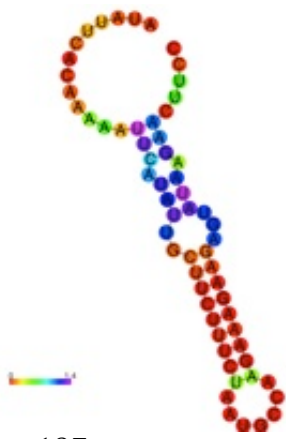

fseq\_187  
MFE-oss -12.1

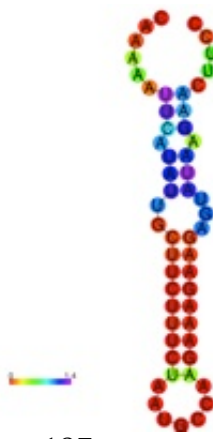

qseq\_187  
MFE-oss -12.1

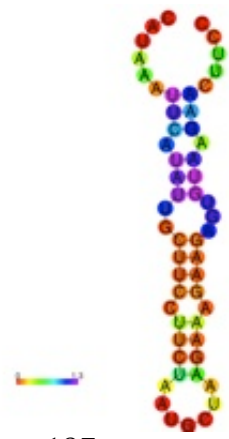

sseq\_187  
MFE-oss -8.3

SeqID  
188

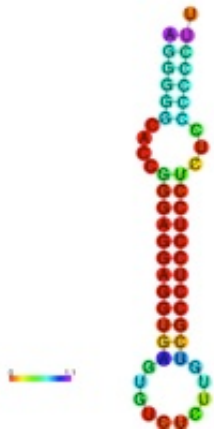

fseq\_188  
MFE-oss -32.5  
MFE-css -32.5

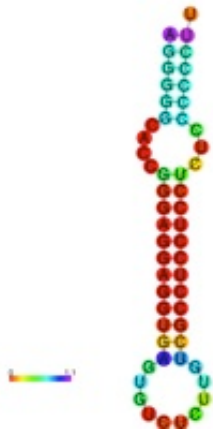

qseq\_188  
MFE-oss -32.5  
MFE-css -32.5

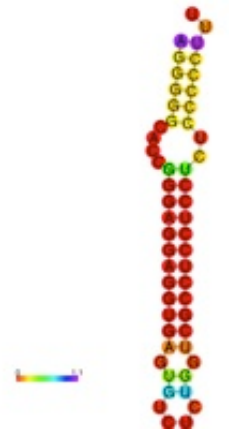

sseq\_188  
MFE-oss -33.3  
MFE-css -34.2

SeqID  
189

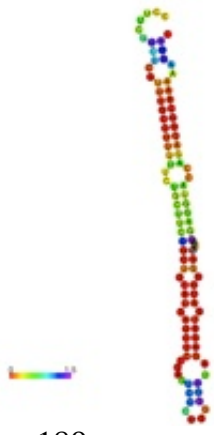

fseq\_189  
MFE-oss -39.4  
MFE-css -39.4

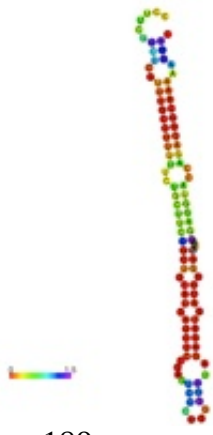

qseq\_189  
MFE-oss -39.4  
MFE-css -39.4

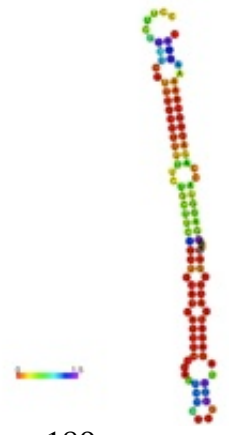

sseq\_189  
MFE-oss -39.4  
MFE-css -39.4

SeqID  
190

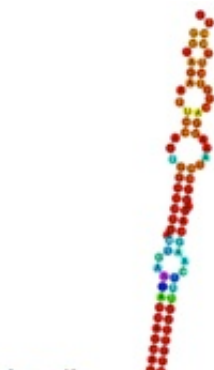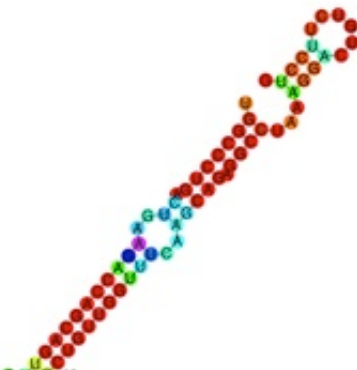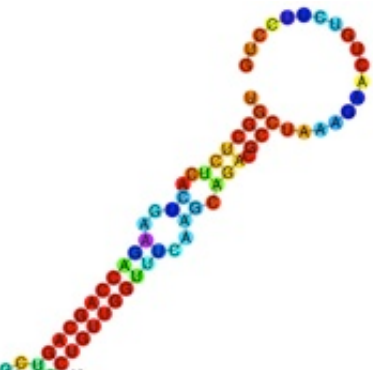



fseq\_190  
MFE-oss -37.7  
MFE-css -38.4



qseq\_190  
MFE-oss -33  
MFE-css -33.7



sseq\_190  
MFE-oss -21.6  
MFE-css -19.8

SeqID  
**191**



fseq\_191  
MFE-oss -37.7  
MFE-css -38.4

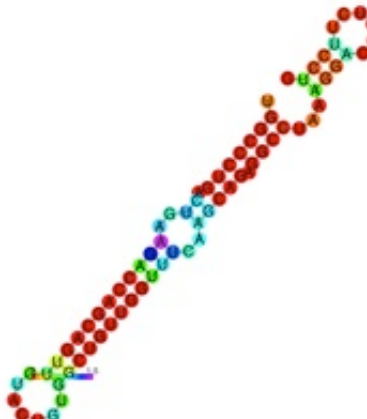

qseq\_191  
MFE-oss -33  
MFE-css -33.7

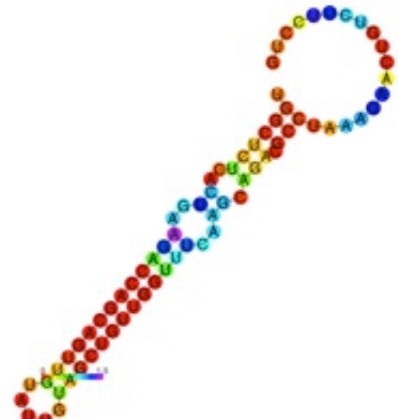

sseq\_191  
MFE-oss -24.2  
MFE-css -22.4

SeqID  
**192**



fseq\_192  
MFE-oss -37.7  
MFE-css -38.4

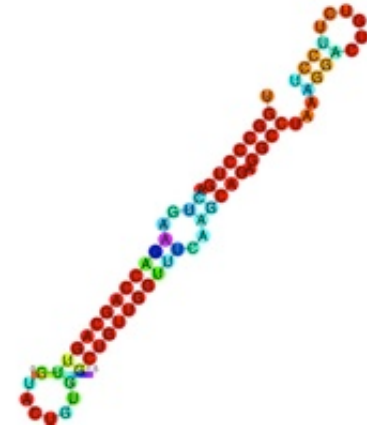

qseq\_192  
MFE-oss -32.3  
MFE-css -33



sseq\_192  
MFE-oss -22.6  
MFE-css -21.3

SeqID  
**193**



fseq\_193

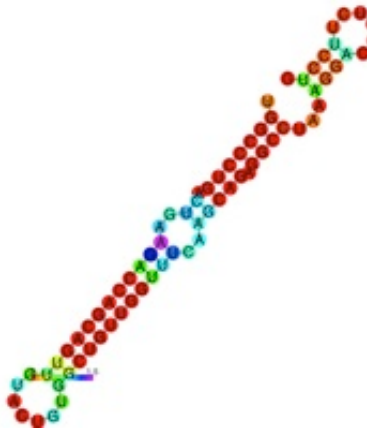

qseq\_193

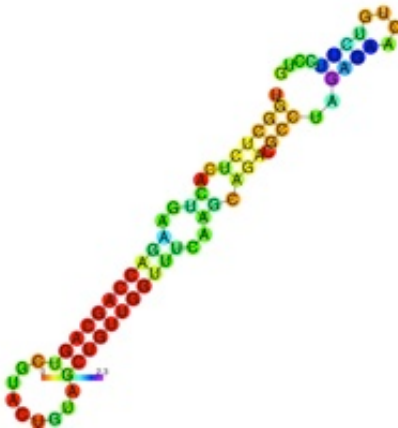

sseq\_193

MFE-oss -37.7  
MFE-css -38.4

MFE-oss -33  
MFE-css -33.7

MFE-oss -22  
MFE-css -17.1

SeqID  
**194**

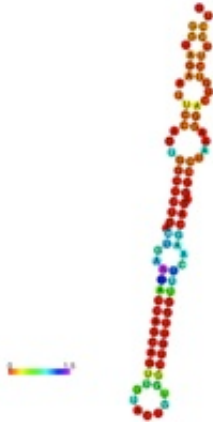

fseq\_194  
MFE-oss -37.7  
MFE-css -38.4

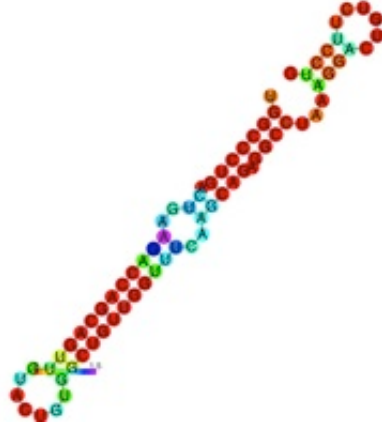

qseq\_194  
MFE-oss -33  
MFE-css -33.7

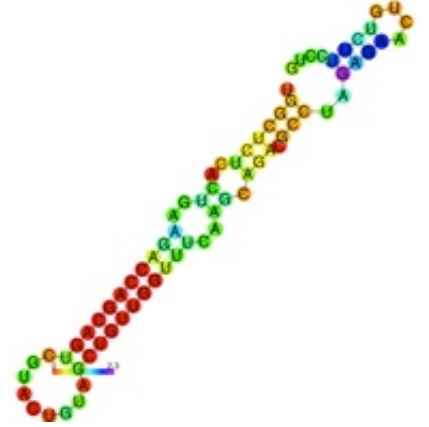

sseq\_194  
MFE-oss -22  
MFE-css -17.1

SeqID  
**195**

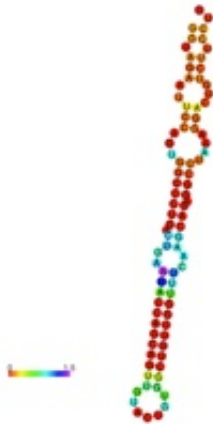

fseq\_195  
MFE-oss -37.7  
MFE-css -38.4

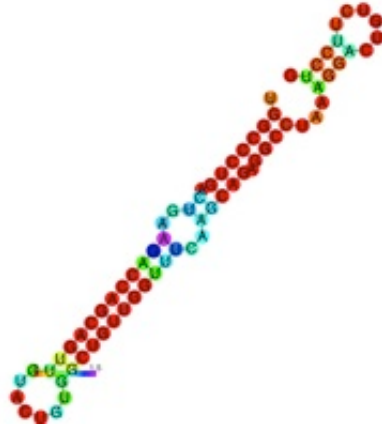

qseq\_195  
MFE-oss -33  
MFE-css -33.7

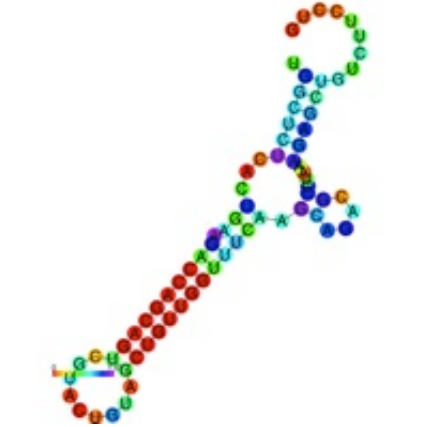

sseq\_195  
MFE-oss -22.3  
MFE-css -22.3

SeqID  
**196**

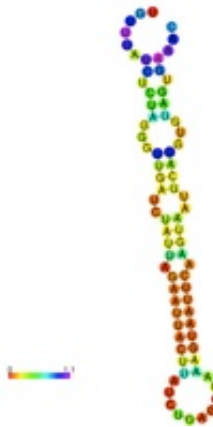

fseq\_196  
MFE-oss -14.9  
MFE-css -14.9

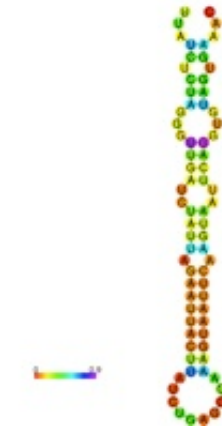

qseq\_196  
MFE-oss -14.9  
MFE-css -14.9

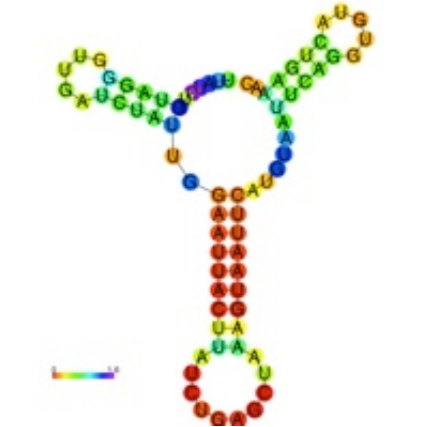

sseq\_196  
MFE-oss -13.8  
MFE-css -14.3

SeqID  
197

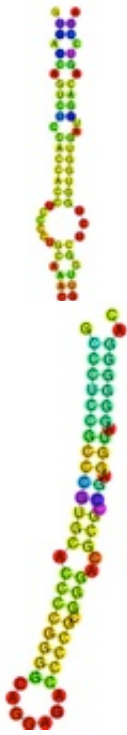

fseq\_198  
MFE-oss -35  
MFE-css -35

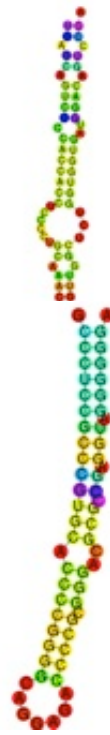

qseq\_198  
MFE-oss -35  
MFE-css -35

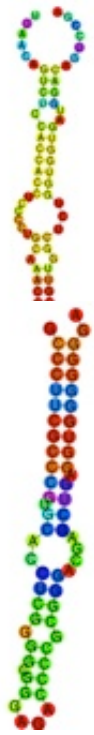

sseq\_198  
MFE-oss -32.6  
MFE-css -32.6

SeqID  
198

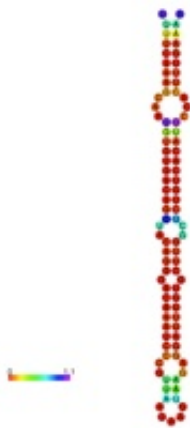

fseq\_199  
MFE-oss -39.4  
MFE-css -39.4

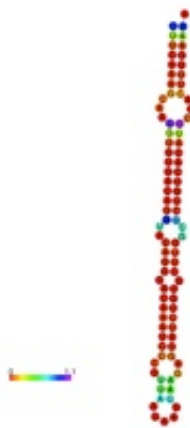

qseq\_199  
MFE-oss -39.2  
MFE-css -39.2

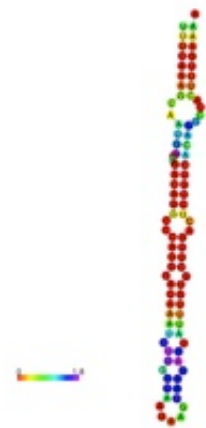

sseq\_199  
MFE-oss -28  
MFE-css -24.51

SeqID  
199

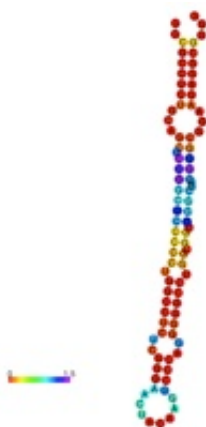

fseq\_200  
MFE-oss -53.1  
MFE-css -52.9

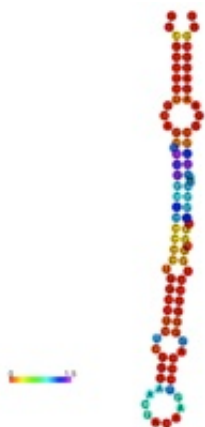

qseq\_200  
MFE-oss -53.1  
MFE-css -52.9

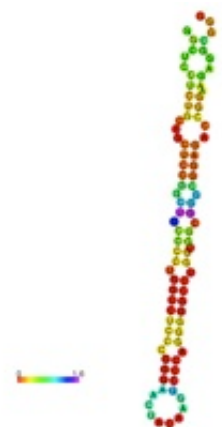

sseq\_200  
MFE-oss -48.9  
MFE-css -50.5

SeqID  
200



SeqID  
201

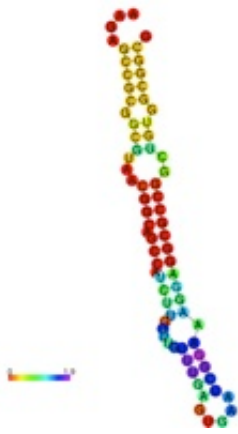

fseq\_201  
MFE-oss -33.1

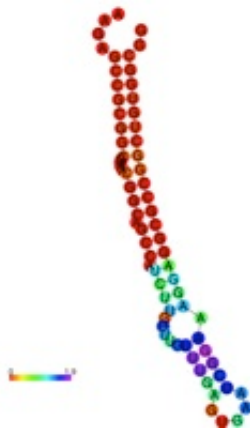

qseq\_201  
MFE-oss -31.5

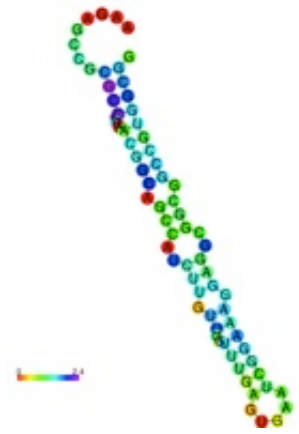

sseq\_201  
MFE-oss -27.1

SeqID  
202

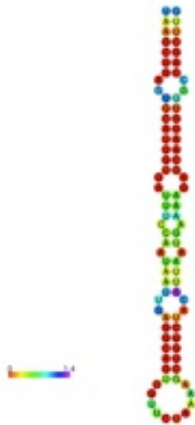

fseq\_202  
MFE-oss -29.2  
MFE-css -29.2

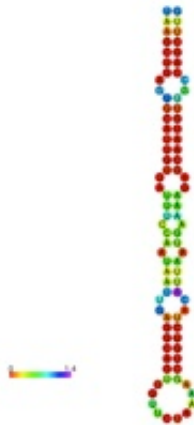

qseq\_202  
MFE-oss -29.2  
MFE-css -29.2

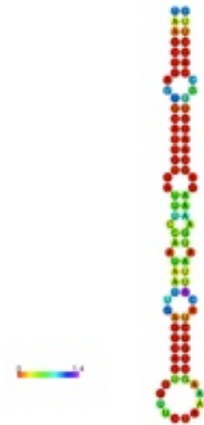

sseq\_202  
MFE-oss -29.2  
MFE-css -29.2

SeqID  
203

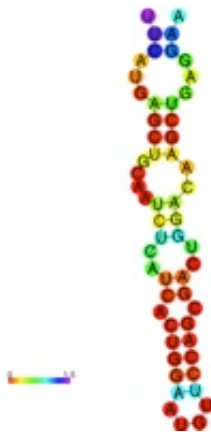

fseq\_203  
MFE-oss -15.3  
MFE-css -15.3

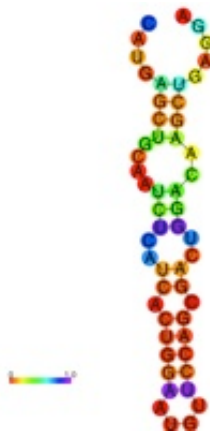

qseq\_203  
MFE-oss -14.6  
MFE-css -14.6

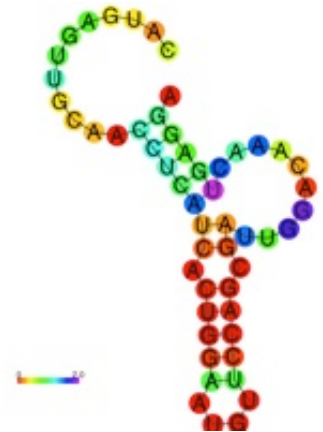

sseq\_203  
MFE-oss -13  
MFE-css -12.5

SeqID  
205

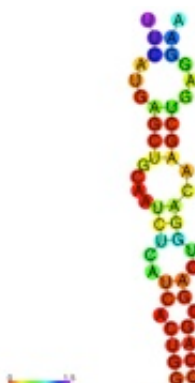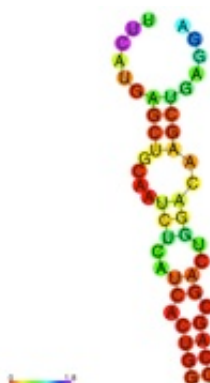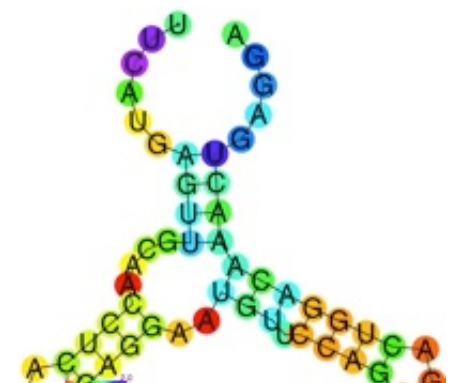

fseq\_205  
MFE-oss -15.3  
MFE-css -15.3

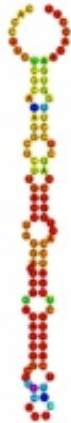

qseq\_205  
MFE-oss -14.6  
MFE-css -14.6

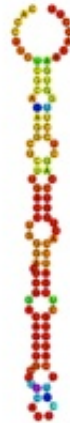

sseq\_205  
MFE-oss -12.3  
MFE-css -12.3

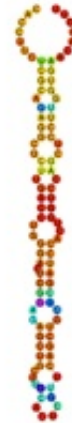

SeqID  
211

fseq\_211  
MFE-oss -36.4  
MFE-css -34.5

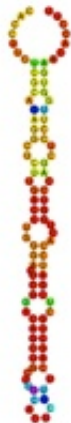

qseq\_211  
MFE-oss -36.4  
MFE-css -34.5

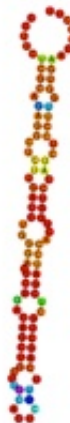

sseq\_211  
MFE-oss -32.3  
MFE-css -30.2

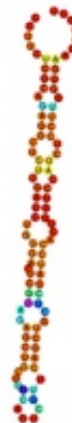

SeqID  
212

fseq\_212  
MFE-oss -36.4  
MFE-css -34.5

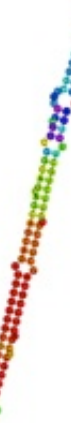

qseq\_212  
MFE-oss -36.4  
MFE-css -34.5

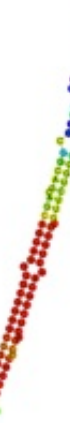

sseq\_212  
MFE-oss -32.3  
MFE-css -30.2

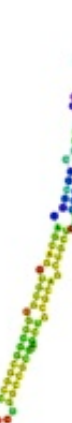

SeqID  
213

fseq\_213  
MFE-oss -61.7  
MFE-css -50.7

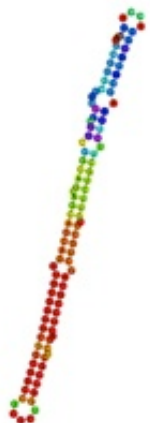

qseq\_213  
MFE-oss -59.9  
MFE-css -55.5

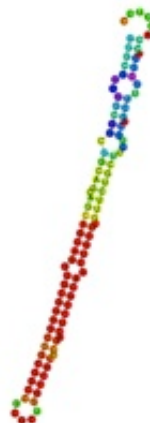

sseq\_213  
MFE-oss -58.4  
MFE-css -48.3

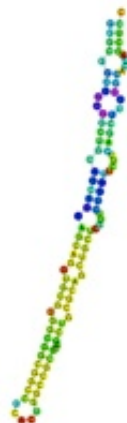

SeqID  
214

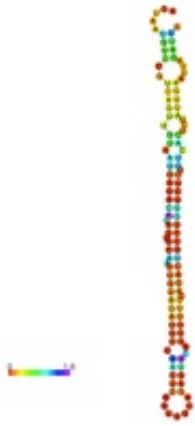

fseq\_214  
MFE-oss -34.5  
MFE-css -34.4

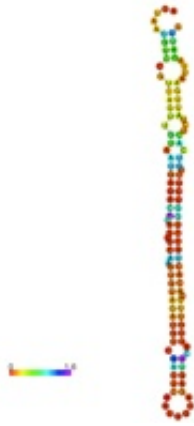

qseq\_214  
MFE-oss -34.5  
MFE-css -34.4

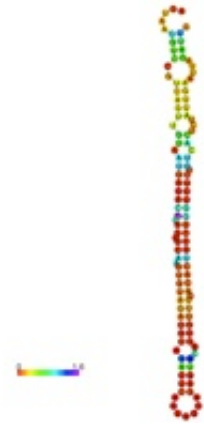

sseq\_214  
MFE-oss -35.1  
MFE-css -35.1

SeqID  
215

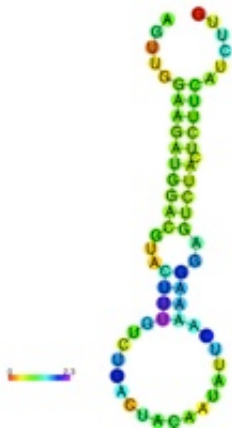

fseq\_215  
MFE-oss -12.57  
MFE-css -10.45

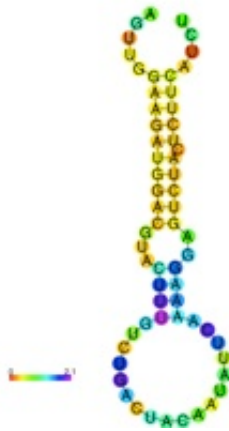

qseq\_215  
MFE-oss -12.57  
MFE-css -12.57

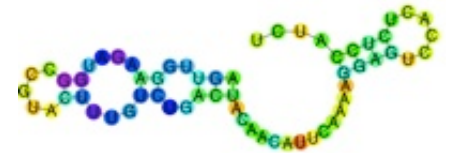

sseq\_215  
MFE-oss -11.5  
MFE-css -5.8

SeqID  
216

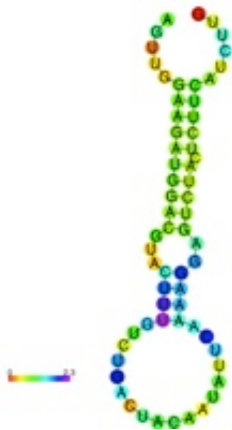

fseq\_216  
MFE-oss -12.57  
MFE-css -10.45

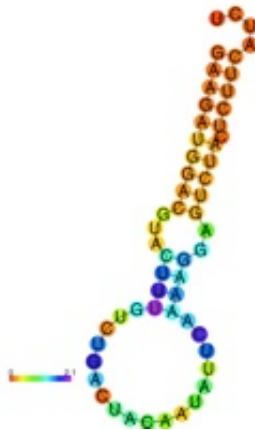

qseq\_216  
MFE-oss -12.57  
MFE-css -12.57

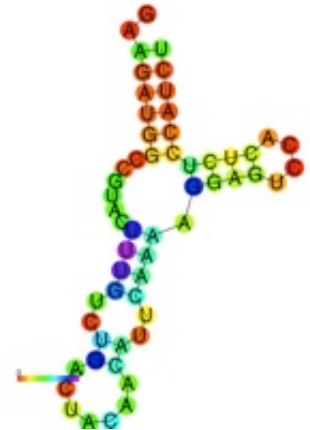

sseq\_216  
MFE-oss -10.3  
MFE-css -7.11

SeqID  
217

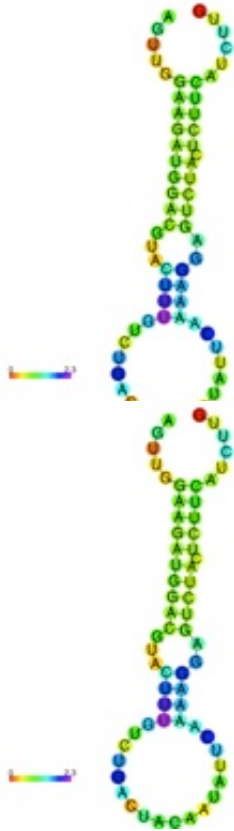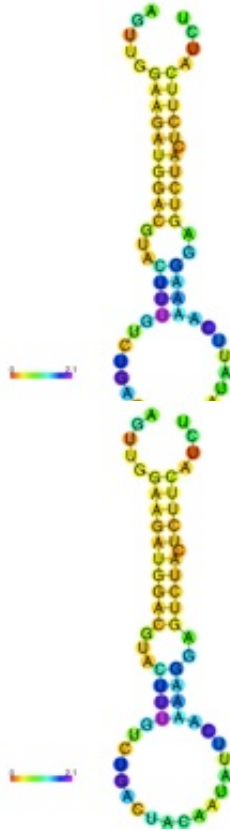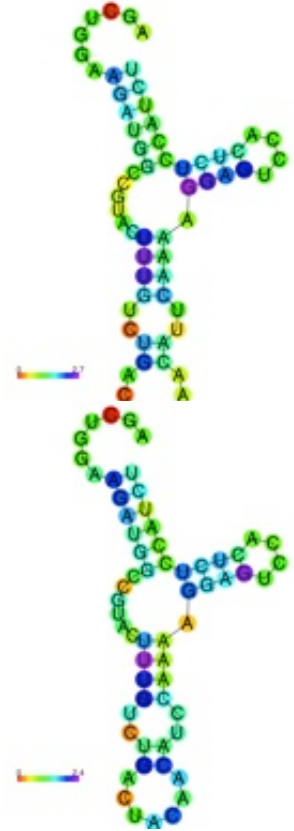

SeqID  
218

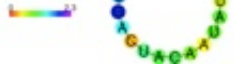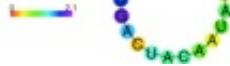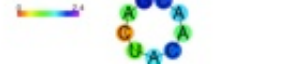

fseq\_218  
MFE-oss -12.57  
MFE-css -10.45

qseq\_218  
MFE-oss -12.57  
MFE-css -12.57

sseq\_218  
MFE-oss -10.5  
MFE-css -7.01

SeqID  
219

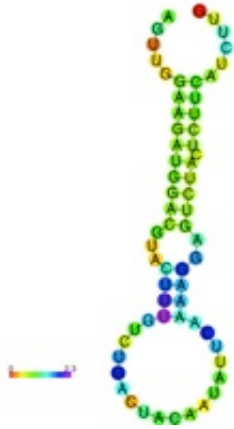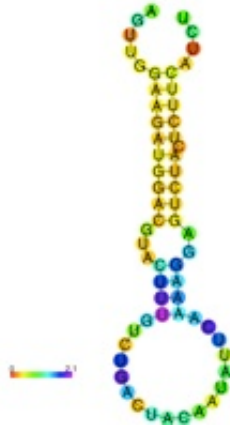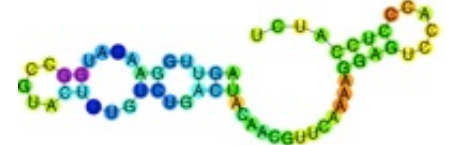

fseq\_219  
MFE-oss -12.57  
MFE-css -10.45

qseq\_219  
MFE-oss -12.57  
MFE-css -12.57

sseq\_219  
MFE-oss -11  
MFE-css -5.3

SeqID  
220

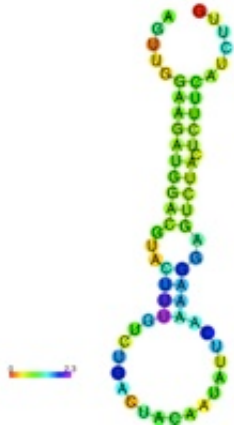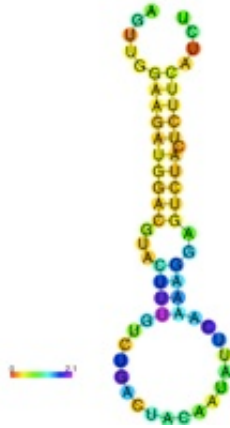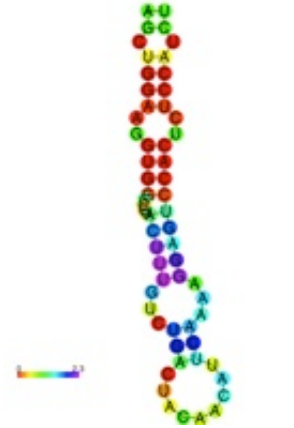

fseq\_220

qseq\_220

sseq\_220

MFE-oss -12.57  
MFE-css -10.45

MFE-oss -12.57  
MFE-css -12.57

MFE-oss -14.7  
MFE-css -9.15

SeqID  
226

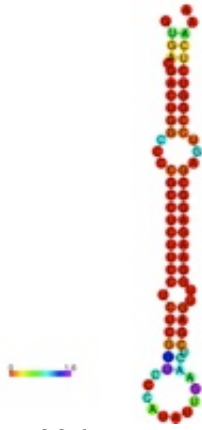

fseq\_226  
MFE-oss -36.1  
MFE-css -35.4

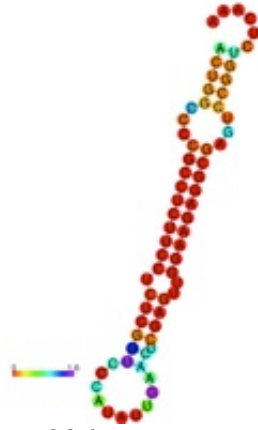

qseq\_226  
MFE-oss -30  
MFE-css -29.3

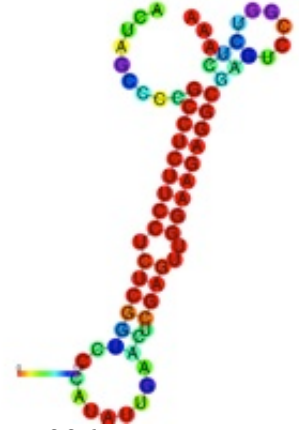

sseq\_226  
MFE-oss -25.6  
MFE-css -24.1

SeqID  
227

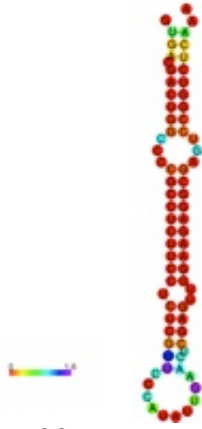

fseq\_227  
MFE-oss -36.1  
MFE-css -35.4

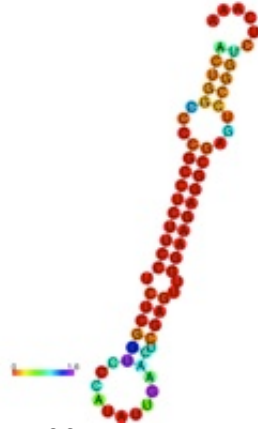

qseq\_227  
MFE-oss -30  
MFE-css -29.3

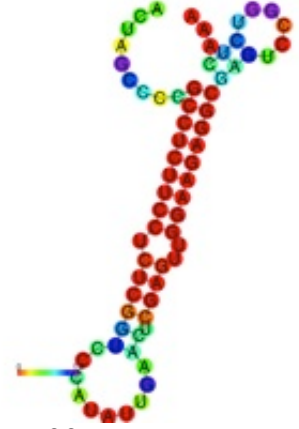

sseq\_227  
MFE-oss -25.6  
MFE-css -24.1

SeqID  
232

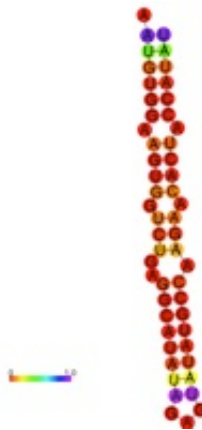

fseq\_232  
MFE-oss -23  
MFE-css -23

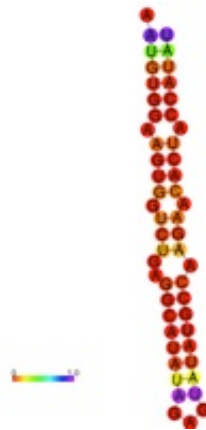

qseq\_232  
MFE-oss -23  
MFE-css -23

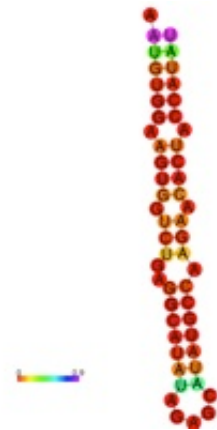

sseq\_232  
MFE-oss -22.6  
MFE-css -22.6

SeqID  
233

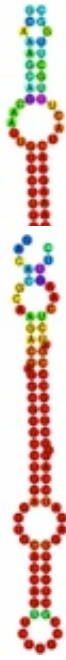

fseq\_234  
MFE-oss -37.4  
MFE-css -37.4

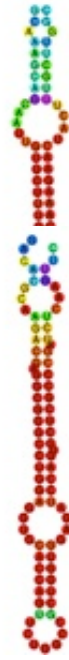

qseq\_234  
MFE-oss -37.4  
MFE-css -37.4

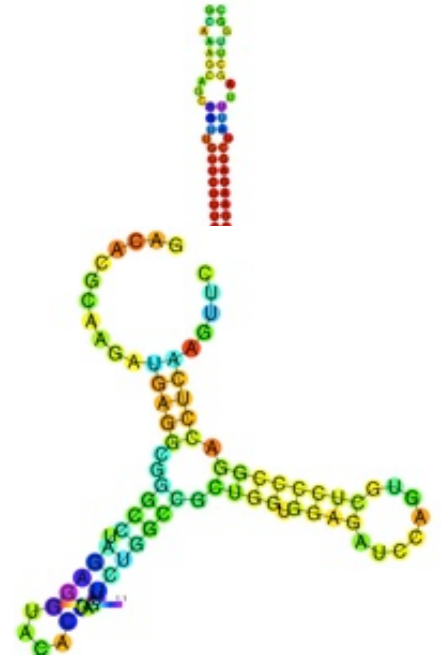

sseq\_234  
MFE-oss -28.3  
MFE-css -28.3

SeqID  
234

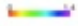

SeqID  
235

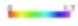

fseq\_235  
MFE-oss -41.7  
MFE-css -41.1

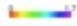

qseq\_235  
MFE-oss -35.1  
MFE-css -34.5

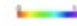

sseq\_235  
MFE-oss -29.1  
MFE-css -28.6

SeqID  
236

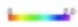

fseq\_236  
MFE-oss -38.02  
MFE-css -36.72

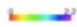

qseq\_236  
MFE-oss -26.22  
MFE-css -17.52

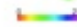

sseq\_236  
MFE-oss -28.22  
MFE-css -20.11

SeqID  
237

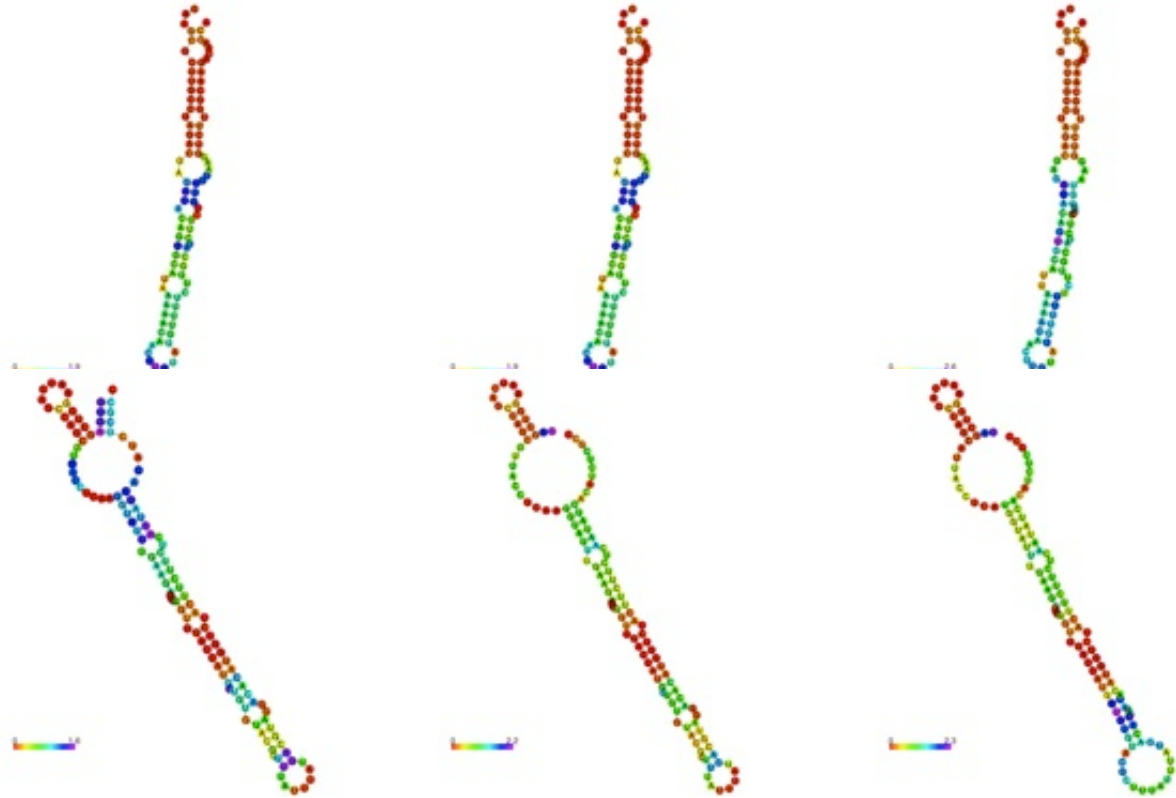

SeqID  
240

fseq\_240  
MFE-oss -36.7  
MFE-css -31.2

qseq\_240  
MFE-oss -33.8  
MFE-css -33.6

sseq\_240  
MFE-oss -30.84  
MFE-css -28.61

SeqID  
241

fseq\_241  
MFE-oss -39.2  
MFE-css -39.2

qseq\_241  
MFE-oss -39.2  
MFE-css -39.2

sseq\_241  
MFE-oss -39.2  
MFE-css -39.2

SeqID  
242

fseq\_242  
MFE-oss -33.7

qseq\_242  
MFE-oss -33.7

sseq\_242  
MFE-oss -33.7

MFE-oss 33.7  
MFE-css -33.62

MFE-oss 33.7  
MFE-css -33.62

MFE-oss 33.7  
MFE-css -33.62

SeqID  
243

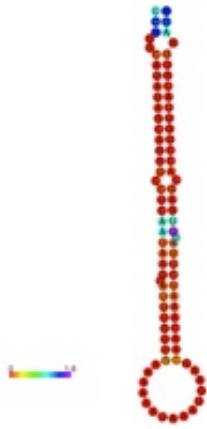

fseq\_243  
MFE-oss -33.26  
MFE-css -33.26

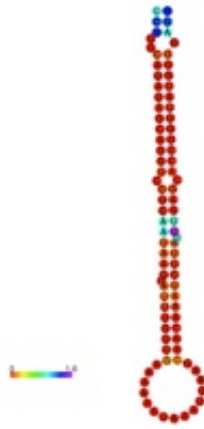

qseq\_243  
MFE-oss -33.26  
MFE-css -33.26

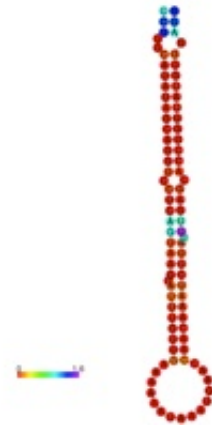

sseq\_243  
MFE-oss -33.46  
MFE-css -33.46

SeqID  
244

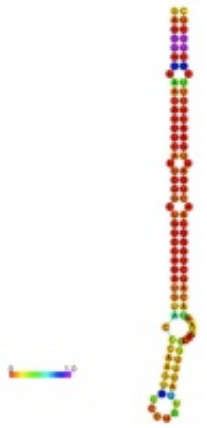

fseq\_244  
MFE-oss -46.6  
MFE-css -43.5

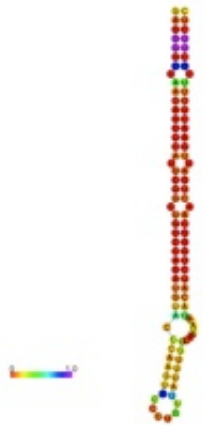

qseq\_244  
MFE-oss -46.6  
MFE-css -43.5

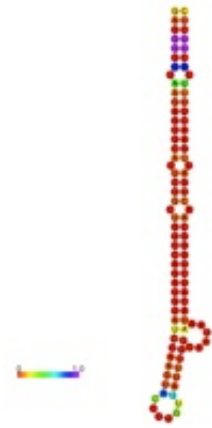

sseq\_244  
MFE-oss -48.8  
MFE-css -45.7

SeqID  
245

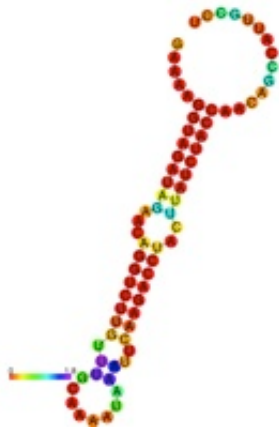

fseq\_245  
MFE-oss -22.3  
MFE-css -22.16

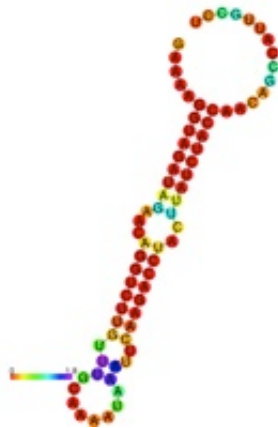

qseq\_245  
MFE-oss -22.3  
MFE-css -22.16

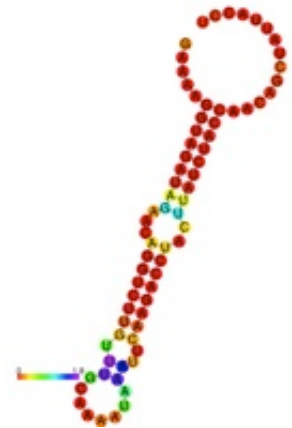

sseq\_245  
MFE-oss -22.3  
MFE-css -22.16



SeqID  
246

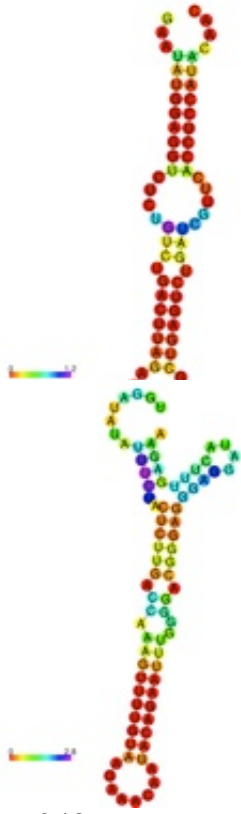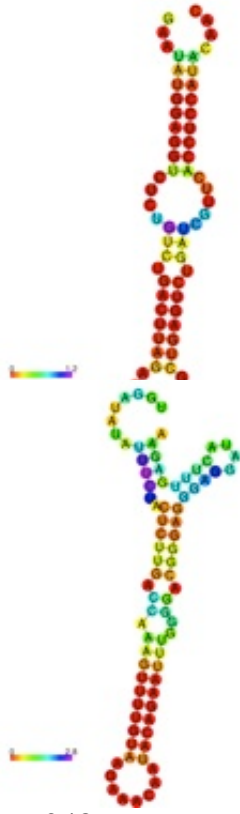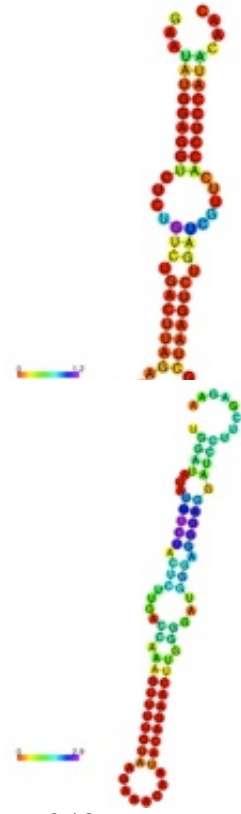

SeqID  
248

fseq\_248  
MFE-oss -20.4  
MFE-css -13.8

qseq\_248  
MFE-oss -20.4  
MFE-css -13.8

sseq\_248  
MFE-oss -23.7  
MFE-css -11.75

SeqID  
249

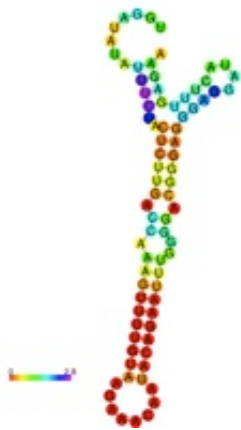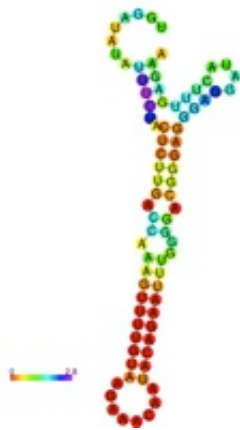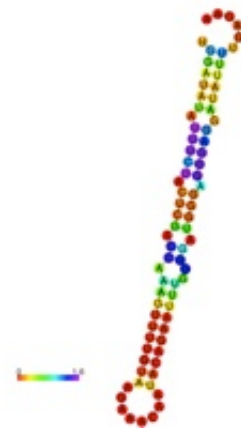

fseq\_249  
MFE-oss -20.4  
MFE-css -13.8

qseq\_249  
MFE-oss -20.4  
MFE-css -13.8

sseq\_249  
MFE-oss -19.8  
MFE-css -18.9

SeqID  
250

SeqID  
251

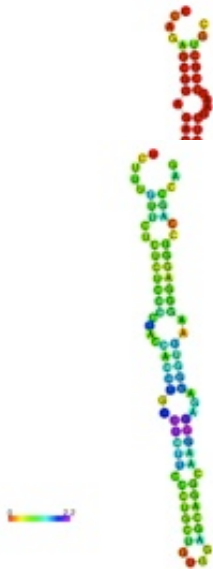

fseq\_251  
MFE-oss -35.1  
MFE-css -30.9

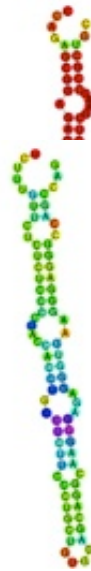

qseq\_251  
MFE-oss -35.1  
MFE-css -30.9

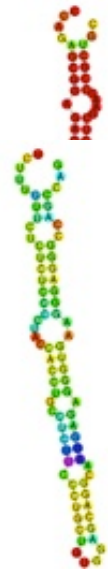

sseq\_251  
MFE-oss -34.3  
MFE-css -34.3

SeqID  
252

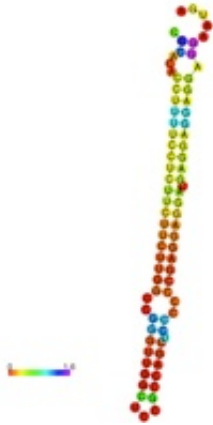

fseq\_252  
MFE-oss -41.8  
MFE-css -41.8

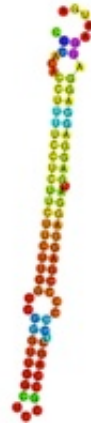

qseq\_252  
MFE-oss -41.8  
MFE-css -41.8

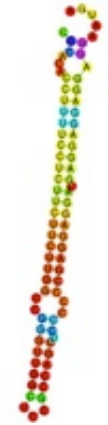

sseq\_252  
MFE-oss -41.8  
MFE-css -41.8

SeqID  
253

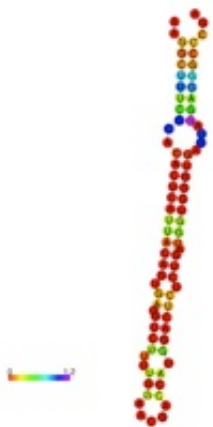

fseq\_253  
MFE-oss -35  
MFE-css -34.8

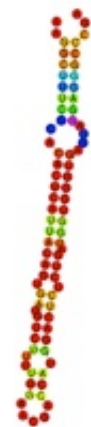

qseq\_253  
MFE-oss -35  
MFE-css -34.8

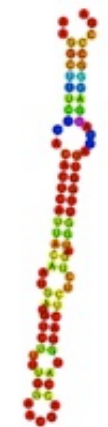

sseq\_253  
MFE-oss -31.6  
MFE-css -31.4

SeqID  
254

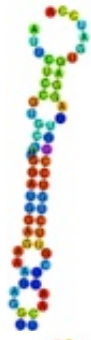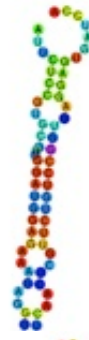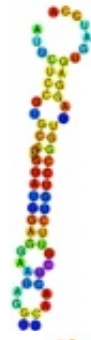

SeqID  
255

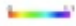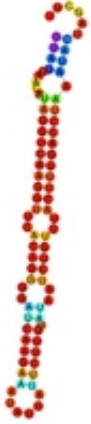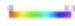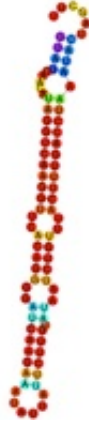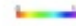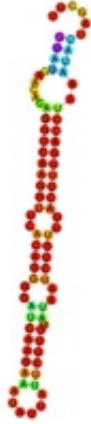

fseq\_255  
MFE-oss -29.2  
MFE-css -29.2

qseq\_255  
MFE-oss -29.2  
MFE-css -29.2

sseq\_255  
MFE-oss -27.6  
MFE-css -27.6

SeqID  
256

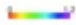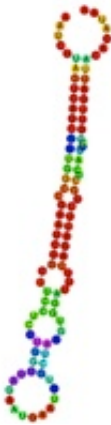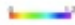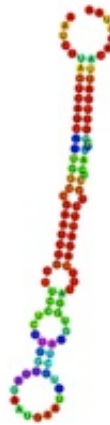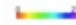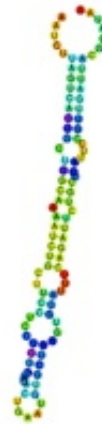

fseq\_256  
MFE-oss -28  
MFE-css -28

qseq\_256  
MFE-oss -28  
MFE-css -28

sseq\_256  
MFE-oss -20.7  
MFE-css -16.63

SeqID  
257

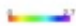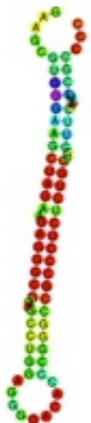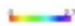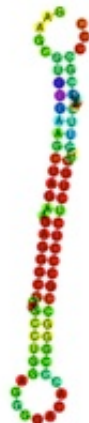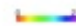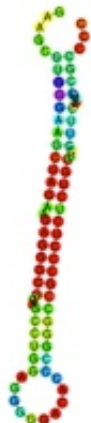

fseq\_257  
MFE-oss -35.9

qseq\_257  
MFE-oss -35.9

sseq\_257  
MFE-oss -35.8

MFE-css -26.7

MFE-css -26.7

MFE-css -24.94

SeqID  
258

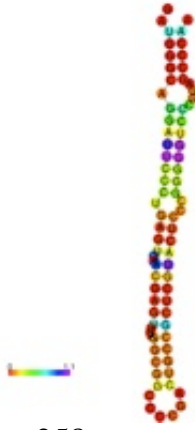

fseq\_258  
MFE-oss -30.6

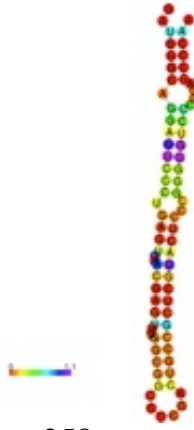

qseq\_258  
MFE-oss -30.6

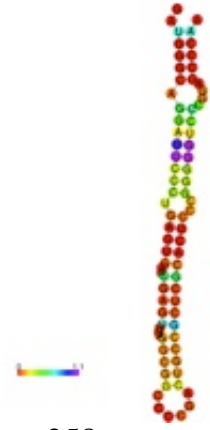

sseq\_258  
MFE-oss -40.5

SeqID  
259

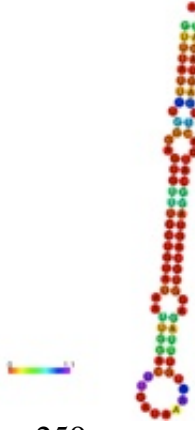

fseq\_259  
MFE-oss -28.5  
MFE-css -28.5

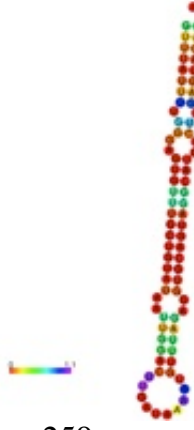

qseq\_259  
MFE-oss -28.5  
MFE-css -28.5

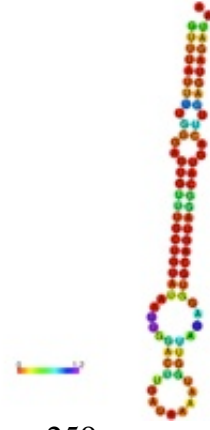

sseq\_259  
MFE-oss -27  
MFE-css -27

SeqID  
260

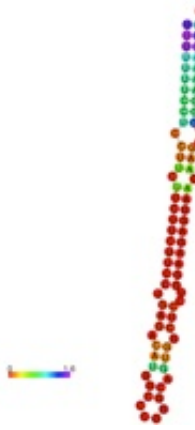

fseq\_260  
MFE-oss -33.3  
MFE-css -31.9

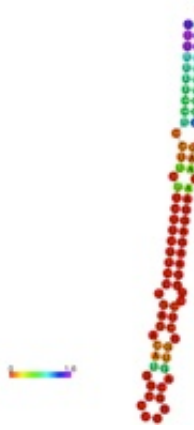

qseq\_260  
MFE-oss -33.3  
MFE-css -31.9

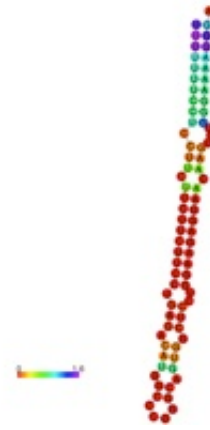

sseq\_260  
MFE-oss -33.3  
MFE-css -31.9

SeqID  
261

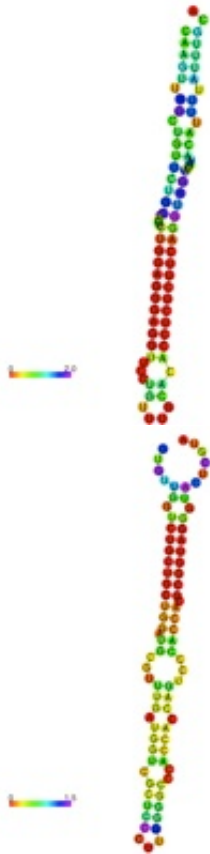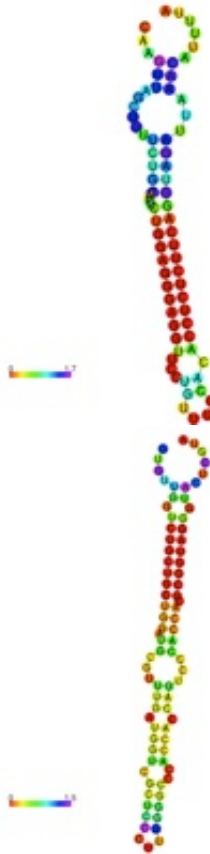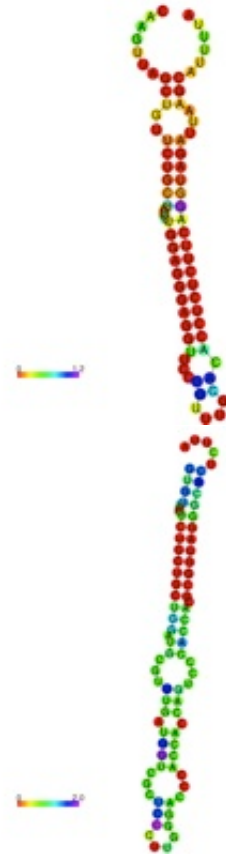

SeqID  
262

fseq\_262  
MFE-oss -28.3  
MFE-css -28.5

qseq\_262  
MFE-oss -28.3  
MFE-css -28.5

sseq\_262  
MFE-oss -28.8  
MFE-css -27.6

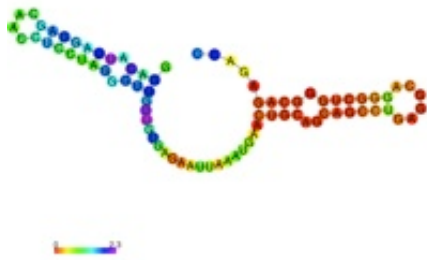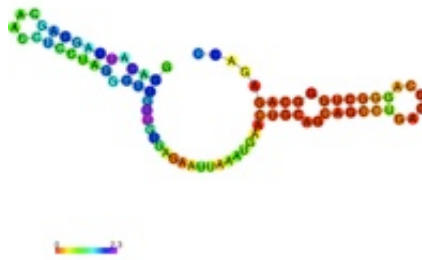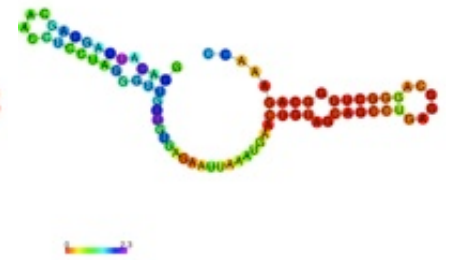

SeqID  
263

fseq\_263  
MFE-oss -26.7  
MFE-css -24.1

qseq\_263  
MFE-oss -26.7  
MFE-css -24.1

sseq\_263  
MFE-oss -25  
MFE-css -22.4

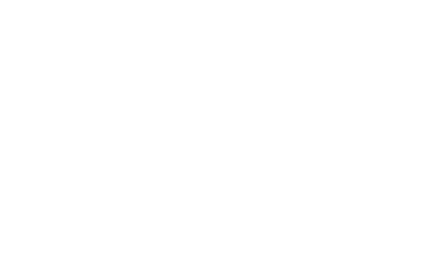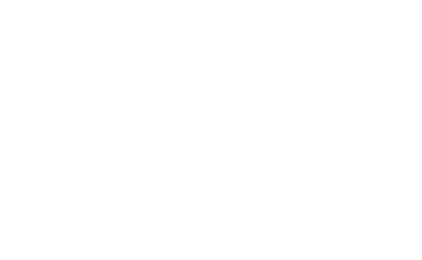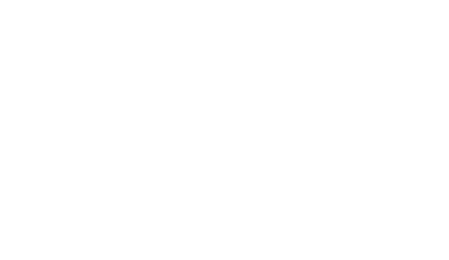

SeqID

264

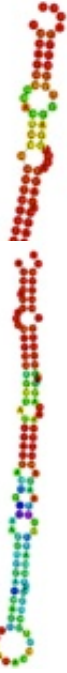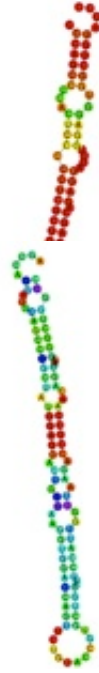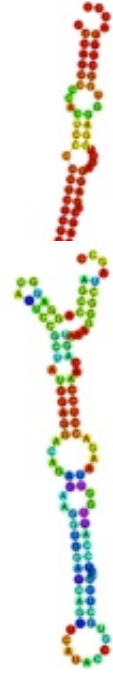

SeqID

268

fseq\_268

MFE-oss -41.4

MFE-css -41.3

qseq\_268

MFE-oss -35.3

MFE-css -34.8

sseq\_268

MFE-oss -32.6

MFE-css -32.4

SeqID

270

fseq\_270

MFE-oss -38.2

MFE-css -38.2

qseq\_270

MFE-oss -37.8

MFE-css -35.5

sseq\_270

MFE-oss -36.6

MFE-css -34.3

SeqID

271

fseq\_271

MFE-oss -36.6

MFE-css -36.3

qseq\_271

MFE-oss -36.3

MFE-css -36.3

sseq\_271

MFE-oss -36.3

MFE-css -36.3

SeqID  
289

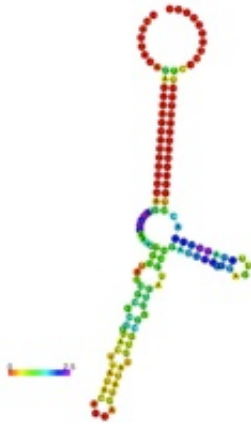

fseq\_289  
MFE-oss -53.1

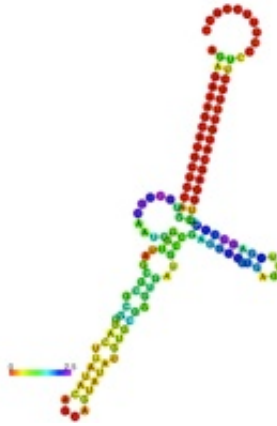

qseq\_289  
MFE-oss -53.1

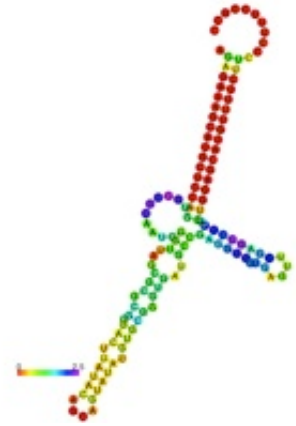

sseq\_289  
MFE-oss -53.1

SeqID  
290

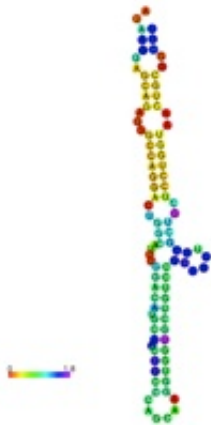

fseq\_290  
MFE-oss -44  
MFE-css -33.3

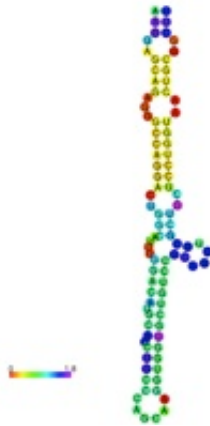

qseq\_290  
MFE-oss -43.6  
MFE-css -32.7

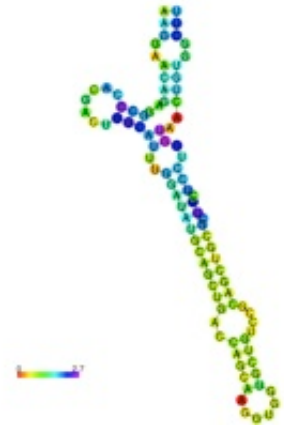

sseq\_290  
MFE-oss -31.4  
MFE-css -21.71

SeqID  
291

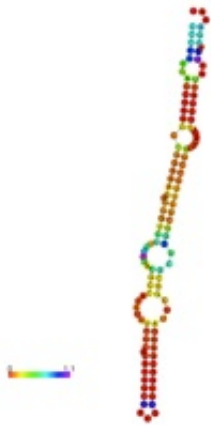

fseq\_291  
MFE-oss -59.5  
MFE-css -59.5

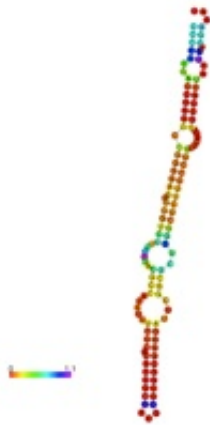

qseq\_291  
MFE-oss -59.5  
MFE-css -59.5

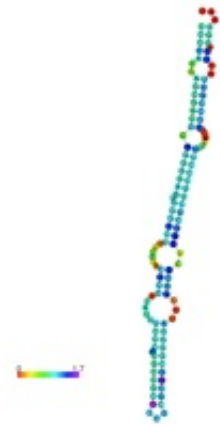

sseq\_291  
MFE-oss -59.5  
MFE-css -59.2

SeqID  
292

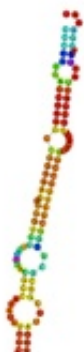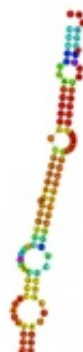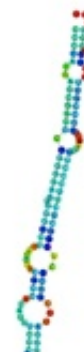

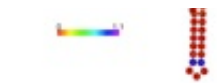

fseq\_292

MFE-oss -59.5

MFE-css -59.5

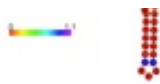

qseq\_292

MFE-oss -59.5

MFE-css -59.5

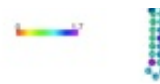

sseq\_292

MFE-oss -59.5

MFE-css -59.2

SeqID  
293

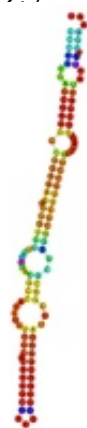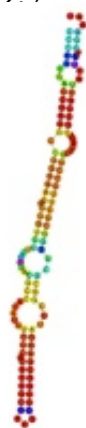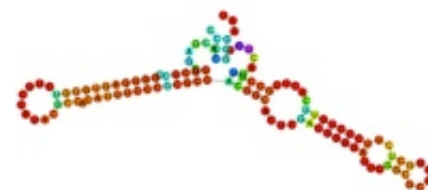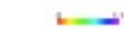

fseq\_293

MFE-oss -59.5

MFE-css -59.5

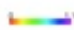

qseq\_293

MFE-oss -59.5

MFE-css -59.5

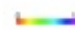

sseq\_293

MFE-oss -53

MFE-css -53

SeqID  
294

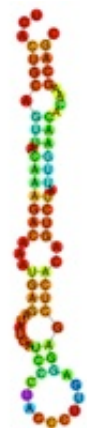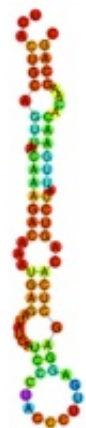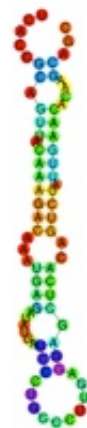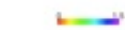

fseq\_294

MFE-oss -14.3

MFE-css -14.3

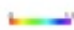

qseq\_294

MFE-oss -14.3

MFE-css -14.3

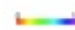

sseq\_294

MFE-oss -11.2

MFE-css -11.2

SeqID  
295

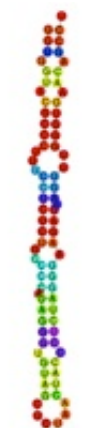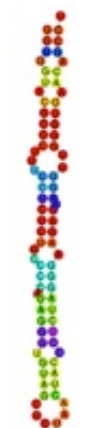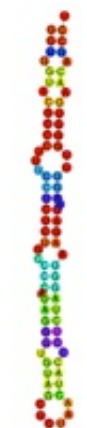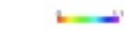

fseq\_295

MFE-oss -38.5

MFE-css -38.5

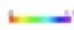

qseq\_295

MFE-oss -38.5

MFE-css -38.5

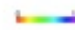

sseq\_295

MFE-oss -38.5

MFE-css -38.5



SeqID  
296

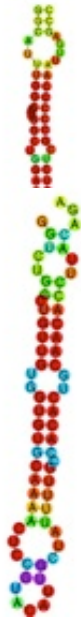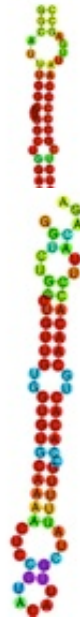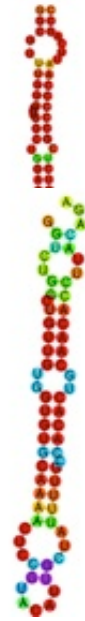

SeqID  
297

fseq\_297  
MFE-oss -23.6  
MFE-css -22.56

qseq\_297  
MFE-oss -23.6  
MFE-css -22.56

sseq\_297  
MFE-oss -23.6  
MFE-css -22.56

SeqID  
300

fseq\_300  
MFE-oss -32.3  
MFE-css -32.3

qseq\_300  
MFE-oss -32.3  
MFE-css -32.3

sseq\_300  
MFE-oss -29.9  
MFE-css -29.9

SeqID  
301

fseq\_301  
MFE-oss -20.8  
MFE-css -19.3

qseq\_301  
MFE-oss -20.8  
MFE-css -19.3

sseq\_301  
MFE-oss -18  
MFE-css -18

SeqID  
302

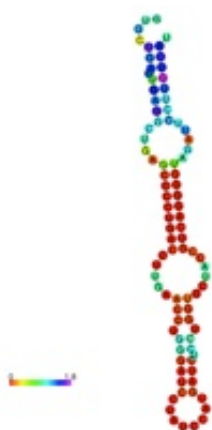

fseq\_302  
MFE-oss -32.6  
MFE-css -30.3

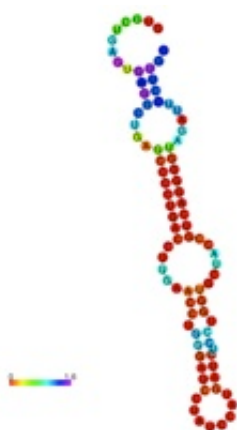

qseq\_302  
MFE-oss -31  
MFE-css -29.3

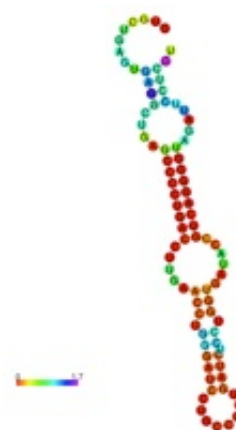

sseq\_302  
MFE-oss -33.4  
MFE-css -32.8

SeqID  
304

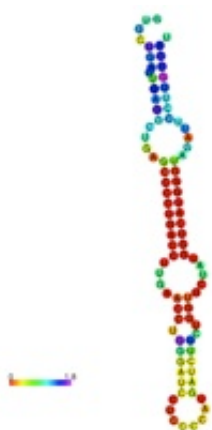

fseq\_304  
MFE-oss -34.9  
MFE-css -32.6

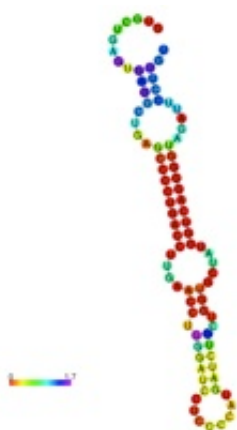

qseq\_304  
MFE-oss -33.3  
MFE-css -31.6



sseq\_304  
MFE-oss -33.4  
MFE-css -32.8

SeqID  
305

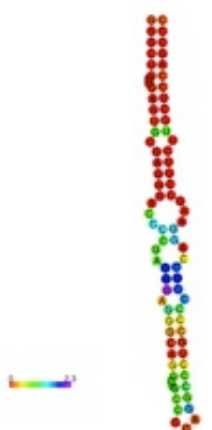

fseq\_305  
MFE-oss -46.6  
MFE-css -42.2

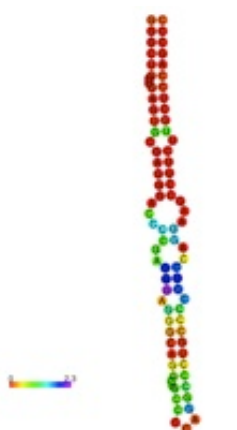

qseq\_305  
MFE-oss -46.6  
MFE-css -42.2

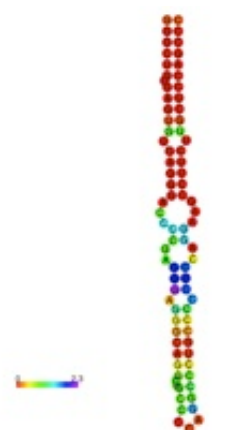

sseq\_305  
MFE-oss -48.9  
MFE-css -44.5

SeqID  
306

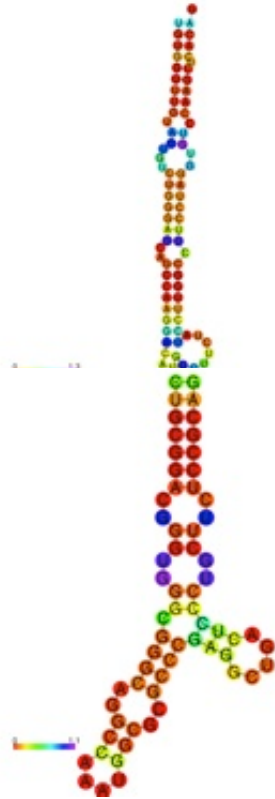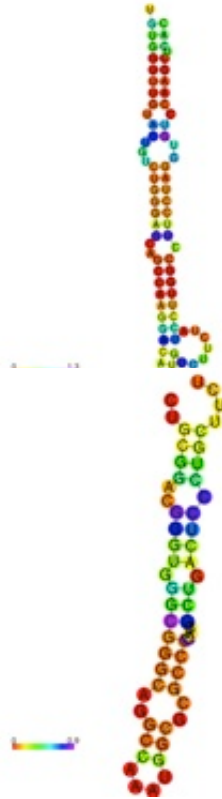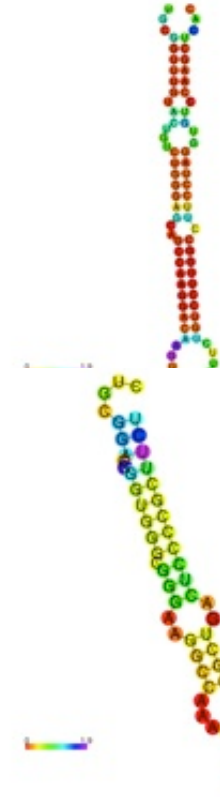

SeqID  
307

fseq\_307  
MFE-oss -36.8  
MFE-css -36.8

qseq\_307  
MFE-oss -25.9  
MFE-css -25.9

sseq\_307  
MFE-oss -24.2  
MFE-css -23.7

SeqID  
309

fseq\_309  
MFE-oss -29.9  
MFE-css -29.9

qseq\_309  
MFE-oss -29.9  
MFE-css -29.9

sseq\_309  
MFE-oss -28.3  
MFE-css -28.3

SeqID  
310

fseq\_310

qseq\_310

sseq\_310

MFE-oss -20.4  
MFE-css -16.3

MFE-oss -20.4  
MFE-css -16.3

MFE-oss -20  
MFE-css -15.9

SeqID  
311

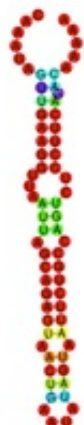

fseq\_311  
MFE-oss -20.4  
MFE-css -16.3

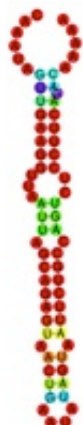

qseq\_311  
MFE-oss -20.4  
MFE-css -16.3

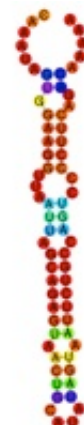

sseq\_311  
MFE-oss -19.2  
MFE-css -19.2

SeqID  
312

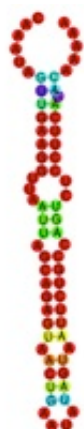

fseq\_312  
MFE-oss -20.4  
MFE-css -16.3

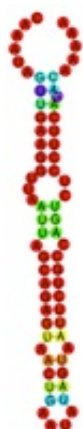

qseq\_312  
MFE-oss -20.4  
MFE-css -16.3

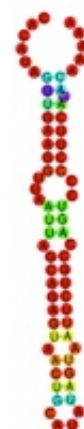

sseq\_312  
MFE-oss -20  
MFE-css -15.9

SeqID  
313

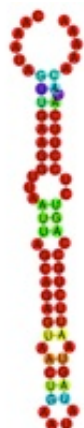

fseq\_313  
MFE-oss -20.4  
MFE-css -16.3

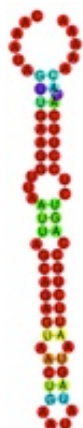

qseq\_313  
MFE-oss -20.4  
MFE-css -16.3

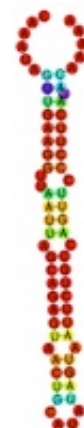

sseq\_313  
MFE-oss -20.9  
MFE-css -16.8

SeqID

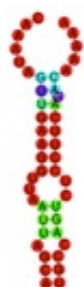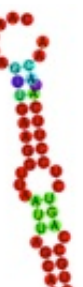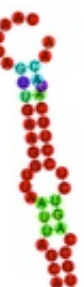

315

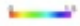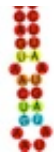

fseq\_315  
MFE-oss -20.4  
MFE-css -16.3

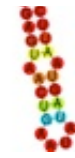

qseq\_315  
MFE-oss -20.4  
MFE-css -16.3

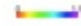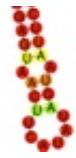

sseq\_315  
MFE-oss -20.6  
MFE-css -16.5

SeqID  
316

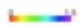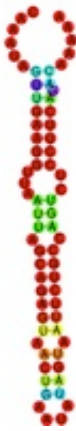

fseq\_316  
MFE-oss -20.4  
MFE-css -16.3

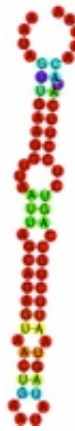

qseq\_316  
MFE-oss -20.4  
MFE-css -16.3

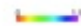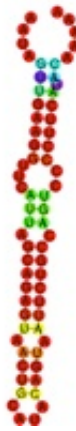

sseq\_316  
MFE-oss -22.1  
MFE-css -18

SeqID  
317

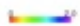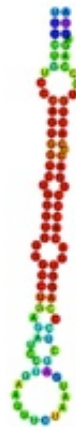

fseq\_317  
MFE-oss -33.1  
MFE-css -32.41

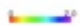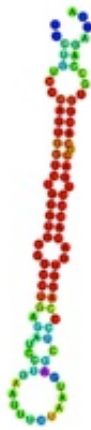

qseq\_317  
MFE-oss -32.7  
MFE-css -32.41

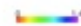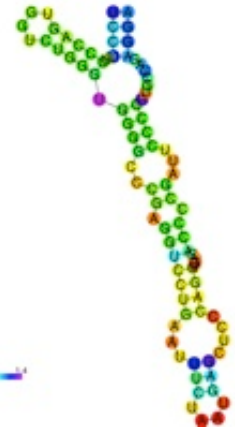

sseq\_317  
MFE-oss -27  
MFE-css -27

SeqID  
318

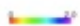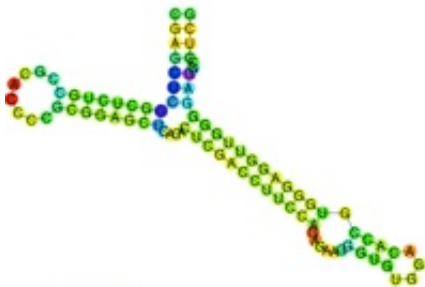

fseq\_318  
MFE-oss -40.2  
MFE-css -40.2

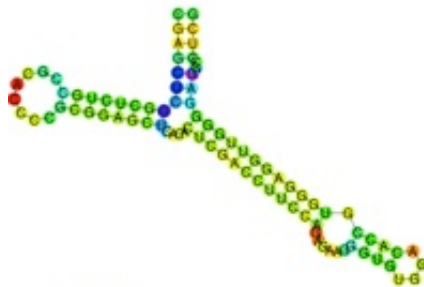

qseq\_318  
MFE-oss -40.2  
MFE-css -40.2

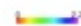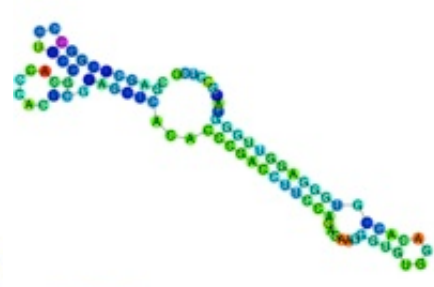

sseq\_318  
MFE-oss -41.4  
MFE-css -26.9

SeqID  
320

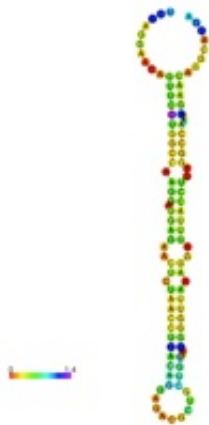

fseq\_320  
MFE-oss -30.1  
MFE-css -30.1

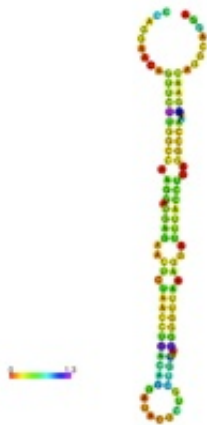

qseq\_320  
MFE-oss -30.1  
MFE-css -30.1

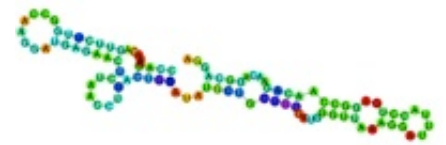

sseq\_320  
MFE-oss -26.5  
MFE-css -24.5

SeqID  
321

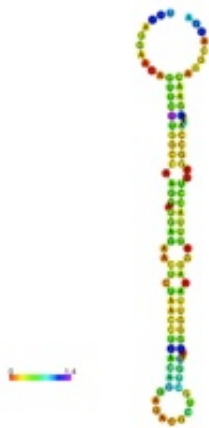

fseq\_321  
MFE-oss -30.1  
MFE-css -30.1

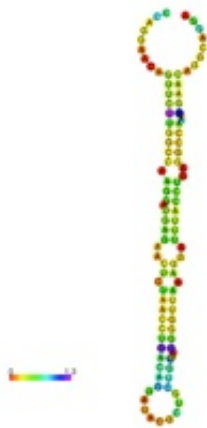

qseq\_321  
MFE-oss -30.1  
MFE-css -30.1

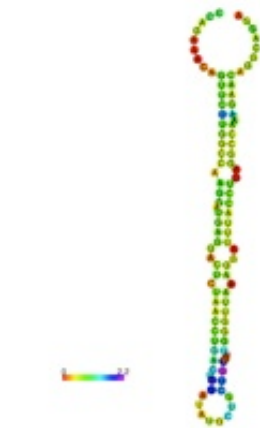

sseq\_321  
MFE-oss -27.5  
MFE-css -27.4

SeqID  
322

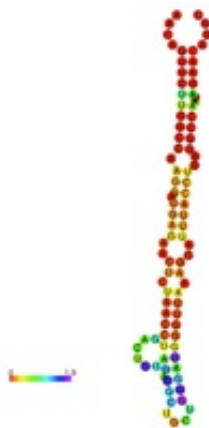

fseq\_322  
MFE-oss -27.4  
MFE-css -24.52

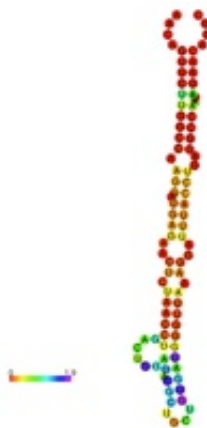

qseq\_322  
MFE-oss -27.4  
MFE-css -24.52

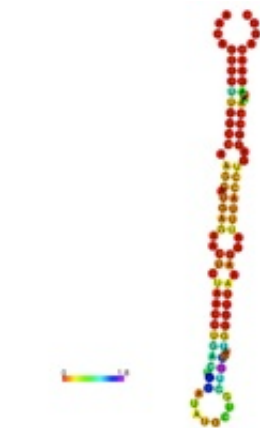

sseq\_322  
MFE-oss -26.3  
MFE-css -26.3

SeqID  
323

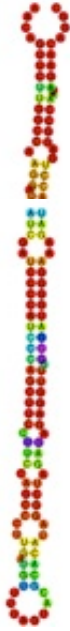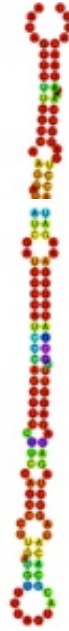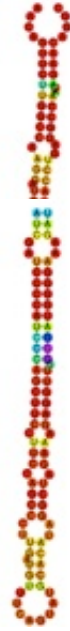

SeqID  
324

fseq\_324  
MFE-oss -41.4  
MFE-css -41.4

qseq\_324  
MFE-oss -41.4  
MFE-css -41.4

sseq\_324  
MFE-oss -42.4  
MFE-css -42.4

SeqID  
325

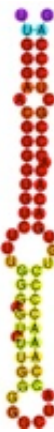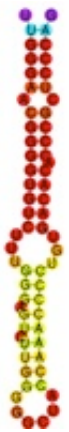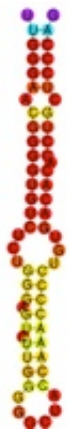

fseq\_325  
MFE-oss -36  
MFE-css -36

qseq\_325  
MFE-oss -36  
MFE-css -36

sseq\_325  
MFE-oss -33.8  
MFE-css -33.8

SeqID  
326

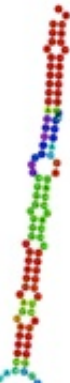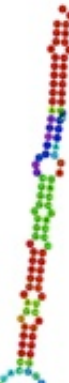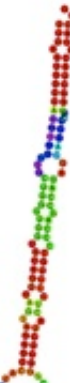

fseq\_326  
MFE-oss -57.84

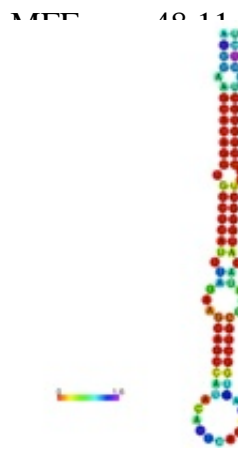

qseq\_326  
MFE-oss -57.84

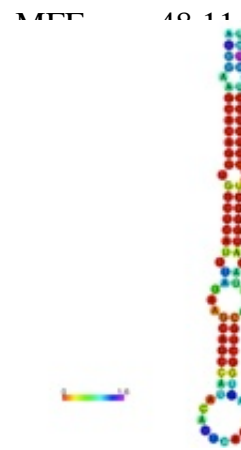

sseq\_326  
MFE-oss -57.84

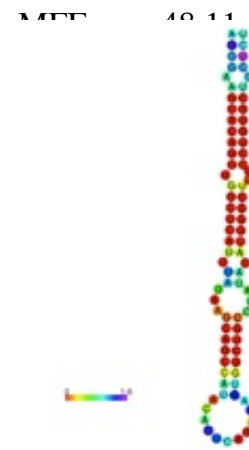

SeqID  
328

fseq\_328  
MFE-oss -41.4  
MFE-css -38.62

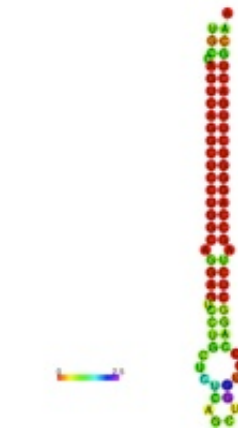

qseq\_328  
MFE-oss -41.4  
MFE-css -38.62

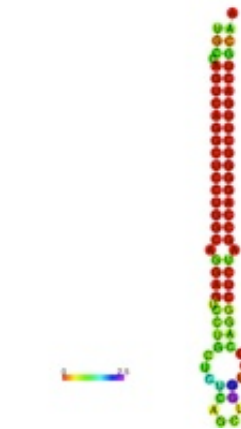

sseq\_328  
MFE-oss -41.4  
MFE-css -38.62

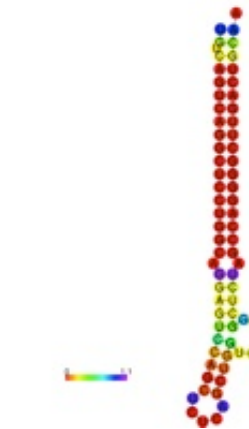

SeqID  
336

fseq\_336  
MFE-oss -44.4  
MFE-css -43.24

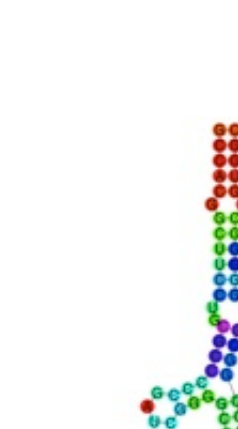

qseq\_336  
MFE-oss -44.4  
MFE-css -43.24

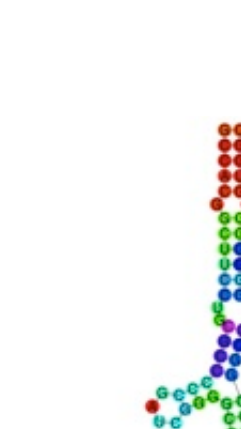

sseq\_336  
MFE-oss -46.9  
MFE-css -46.9

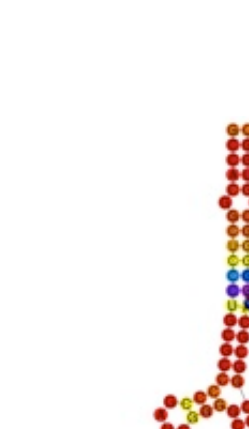

SeqID  
345

fseq\_345  
MFE-oss -45.3  
MFE-css -37.1

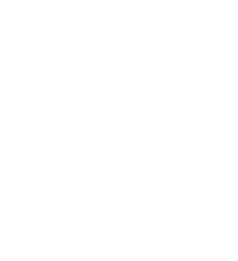

qseq\_345  
MFE-oss -45.3  
MFE-css -37.1

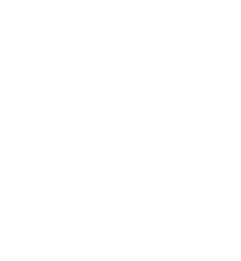

sseq\_345  
MFE-oss -49.4  
MFE-css -49.4

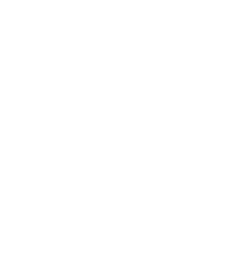



SeqID

347

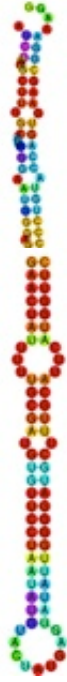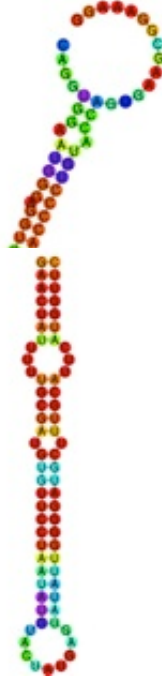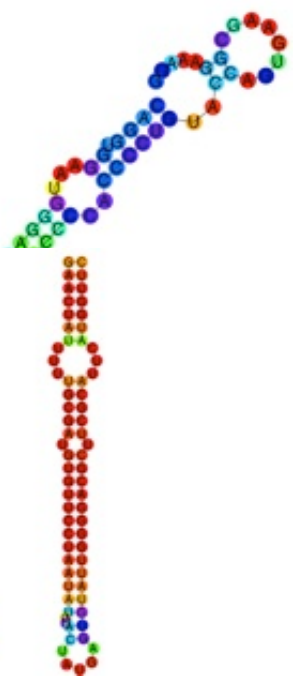

SeqID  
348

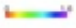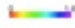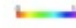

fseq\_348  
MFE-oss -26.3  
MFE-css -26.1

qseq\_348  
MFE-oss -26.3  
MFE-css -26.1

sseq\_348  
MFE-oss -30.7  
MFE-css -28.62

SeqID  
350

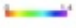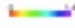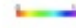

fseq\_350  
MFE-oss -33.8  
MFE-css -33.2

qseq\_350  
MFE-oss -33.8  
MFE-css -33.2

sseq\_350  
MFE-oss -29.6  
MFE-css -28.1

SeqID  
353

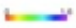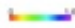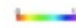

fseq\_353  
MFE-oss -19.4  
MFE-css -17.4

qseq\_353  
MFE-oss -19.4  
MFE-css -17.4

sseq\_353  
MFE-oss -25.9  
MFE-css -25.5

SeqID  
356

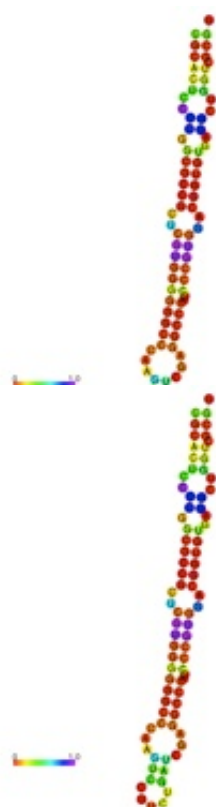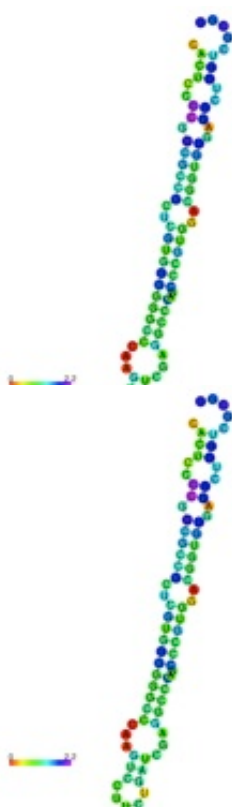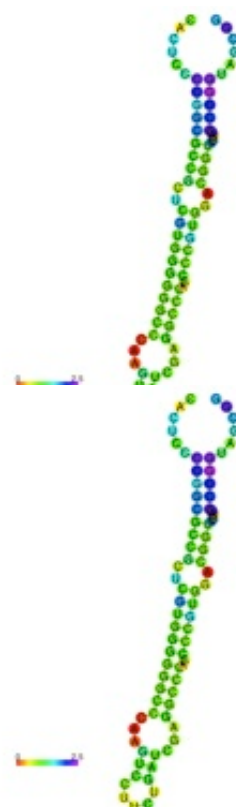

SeqID  
357

fseq\_357  
MFE-oss -38.3  
MFE-css -38.3

qseq\_357  
MFE-oss -32.8  
MFE-css -23.3

sseq\_357  
MFE-oss -33.4  
MFE-css -24.7

SeqID  
358

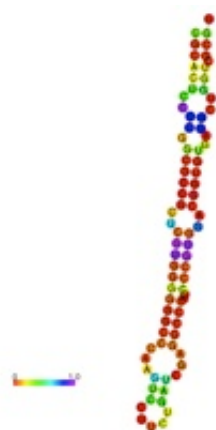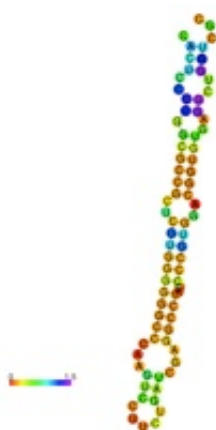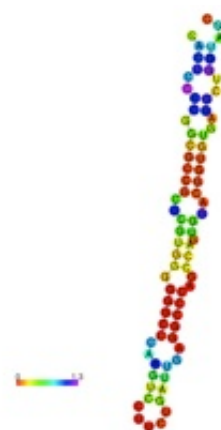

fseq\_358  
MFE-oss -38.3  
MFE-css -38.3

qseq\_358  
MFE-oss -32.8  
MFE-css -32.8

sseq\_358  
MFE-oss -34.1  
MFE-css -34.1

SeqID  
359

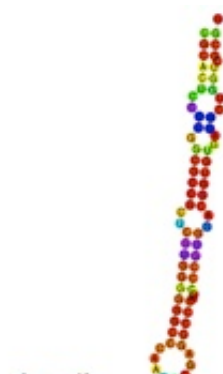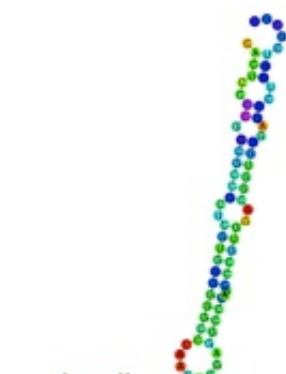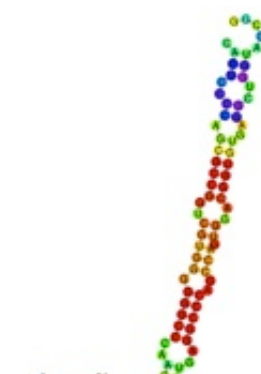

SeqID  
361

fseq\_361  
MFE-oss -38.3  
MFE-css -38.3

qseq\_361  
MFE-oss -32.8  
MFE-css -23.3

sseq\_361  
MFE-oss -31.1  
MFE-css -8.83

SeqID  
362

fseq\_362  
MFE-oss -38.3  
MFE-css -38.3

qseq\_362  
MFE-oss -32.8  
MFE-css -23.3

sseq\_362  
MFE-oss -32.5  
MFE-css -30

SeqID  
363

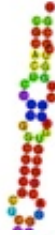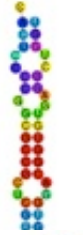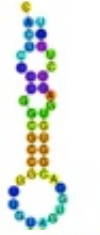

SeqID  
366

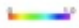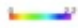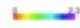

fseq\_366  
MFE-oss -38.3  
MFE-css -38.3

qseq\_366  
MFE-oss -32.8  
MFE-css -23.3

sseq\_366  
MFE-oss -32.1  
MFE-css -23.8

SeqID  
367

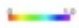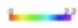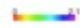

fseq\_367  
MFE-oss -38.3  
MFE-css -38.3

qseq\_367  
MFE-oss -32.8  
MFE-css -23.3

sseq\_367  
MFE-oss -29.9  
MFE-css -30.1

SeqID  
368

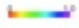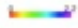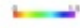

fseq\_368  
MFE-oss -38.3  
MFE-css -38.3

qseq\_368  
MFE-oss -32.8  
MFE-css -23.3

sseq\_368  
MFE-oss -33.4  
MFE-css -33.4

SeqID  
369

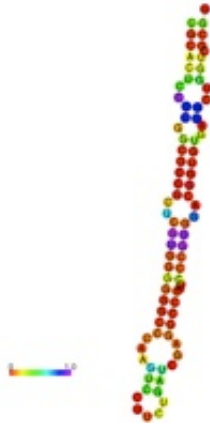

fseq\_369  
MFE-oss -38.3  
MFE-css -38.3

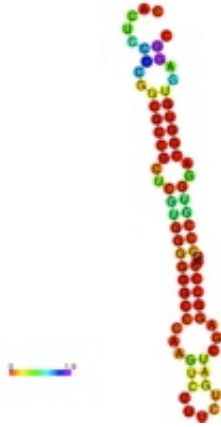

qseq\_369  
MFE-oss -31.2  
MFE-css -29.1

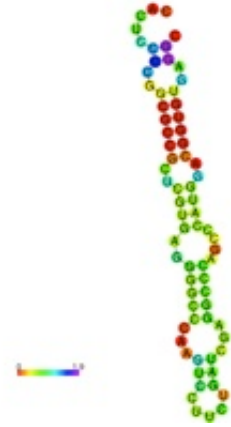

sseq\_369  
MFE-oss -28.9  
MFE-css -26.8

SeqID  
370

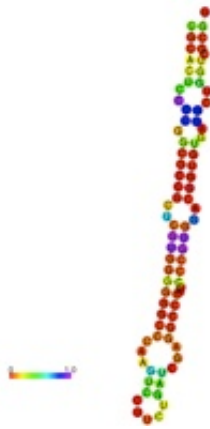

fseq\_370  
MFE-oss -38.3  
MFE-css -38.3

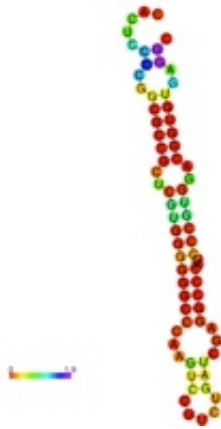

qseq\_370  
MFE-oss -31.2  
MFE-css -29.1

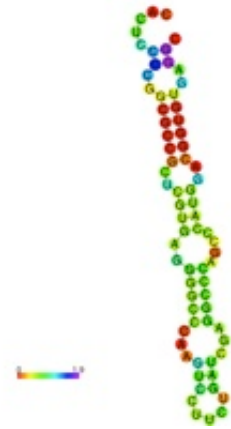

sseq\_370  
MFE-oss -28.9  
MFE-css -26.8

SeqID  
374

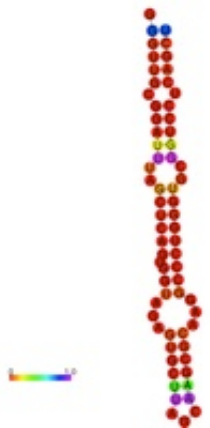

fseq\_374  
MFE-oss -30.2  
MFE-css -30.2

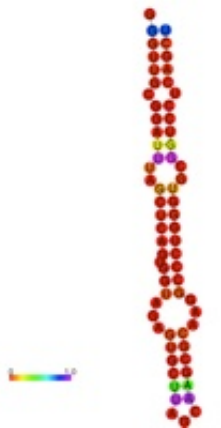

qseq\_374  
MFE-oss -30.2  
MFE-css -30.2

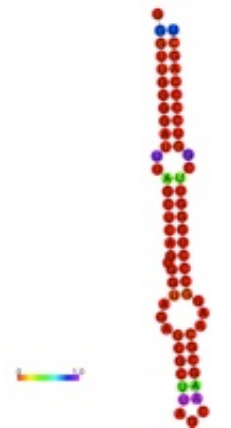

sseq\_374  
MFE-oss -40.8  
MFE-css -40.8

SeaID

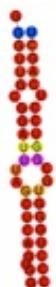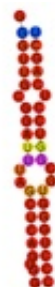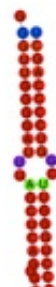

375

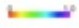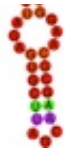

fseq\_375  
MFE-oss -30.2  
MFE-css -30.2

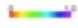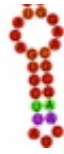

qseq\_375  
MFE-oss -30.2  
MFE-css -30.2

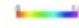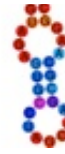

sseq\_375  
MFE-oss -37.2  
MFE-css -37.2

SeqID  
388

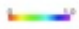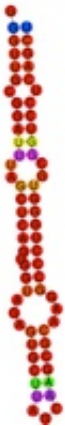

fseq\_388  
MFE-oss -30.2  
MFE-css -30.2

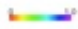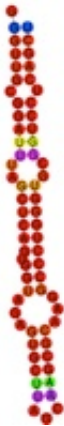

qseq\_388  
MFE-oss -30.2  
MFE-css -30.2

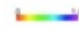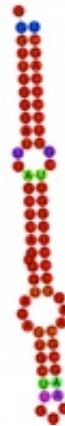

sseq\_388  
MFE-oss -38.9  
MFE-css -38.9

SeqID  
395

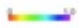

fseq\_395  
MFE-oss -30.2  
MFE-css -30.2

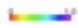

qseq\_395  
MFE-oss -30.2  
MFE-css -30.2

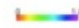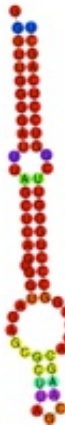

sseq\_395  
MFE-oss -31.5  
MFE-css -31.5

SeqID  
396

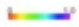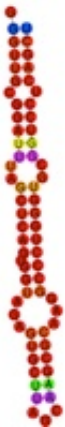

fseq\_396  
MFE-oss -30.2  
MFE-css -30.2

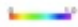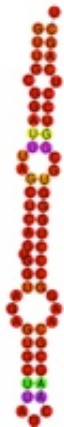

qseq\_396  
MFE-oss -29.4  
MFE-css -29.4

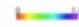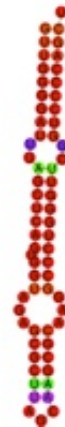

sseq\_396  
MFE-oss -40  
MFE-css -40

SeqID  
400

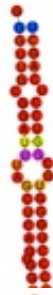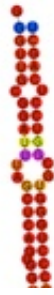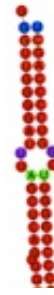

SeqID  
407

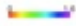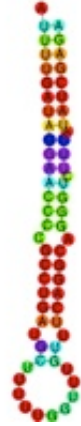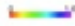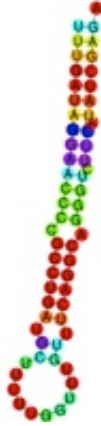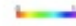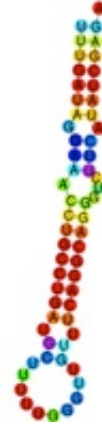

fseq\_407  
MFE-oss -25.4  
MFE-css -24.9

qseq\_407  
MFE-oss -24.6  
MFE-css -24.1

sseq\_407  
MFE-oss -25.4  
MFE-css -23.19

SeqID  
408

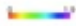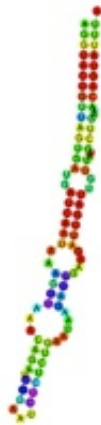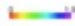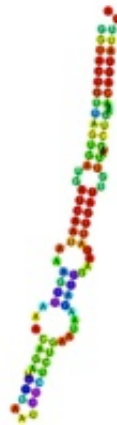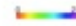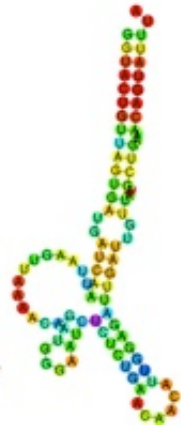

fseq\_408  
MFE-oss -21.9  
MFE-css -19.5

qseq\_408  
MFE-oss -20.7  
MFE-css -18.2

sseq\_408  
MFE-oss -21.3  
MFE-css -20.9

SeqID  
410

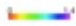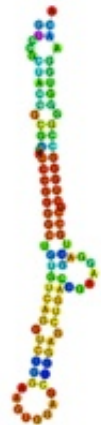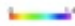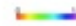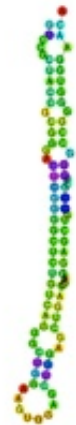

fseq\_410  
MFE-oss -39.91  
MFE-css -40.21

qseq\_410  
MFE-oss -39.91  
MFE-css -40.21

sseq\_410  
MFE-oss -35.6  
MFE-css -35.0

SeqID  
412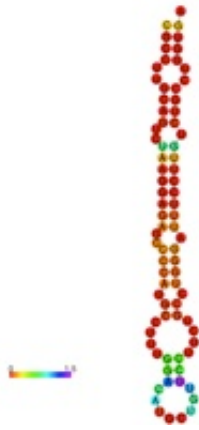fseq\_412  
MFE-oss -32.8  
MFE-css -32.8qseq\_412  
MFE-oss -32.8  
MFE-css -32.8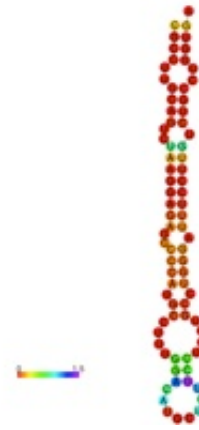sseq\_412  
MFE-oss -32.8  
MFE-css -32.8SeqID  
413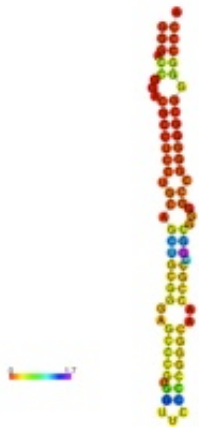fseq\_413  
MFE-oss -50.1  
MFE-css -50.1qseq\_413  
MFE-oss -50.1  
MFE-css -50.1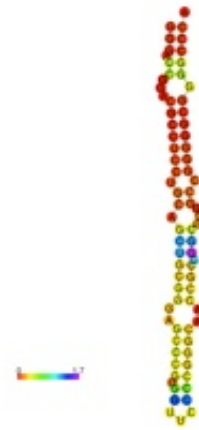sseq\_413  
MFE-oss -50.1  
MFE-css -50.1SeqID  
415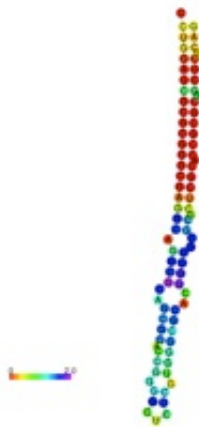fseq\_415  
MFE-oss -51  
MFE-css -50.2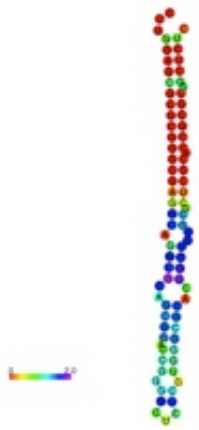qseq\_415  
MFE-oss -48.9  
MFE-css -48.1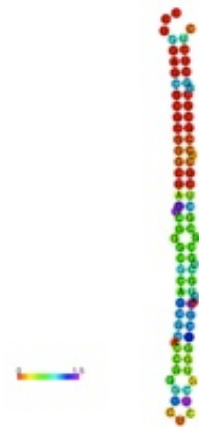sseq\_415  
MFE-oss -50.7  
MFE-css -51



SeqID  
416

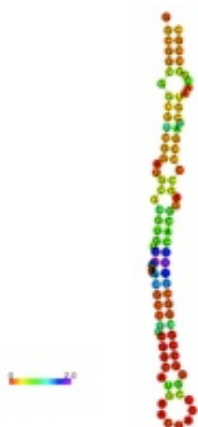

fseq\_416  
MFE-oss -46.4  
MFE-css -35.94

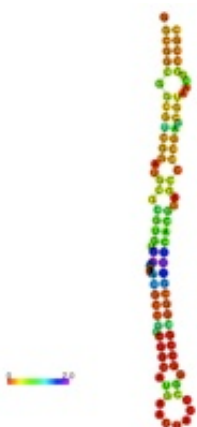

qseq\_416  
MFE-oss -46.4  
MFE-css -35.94

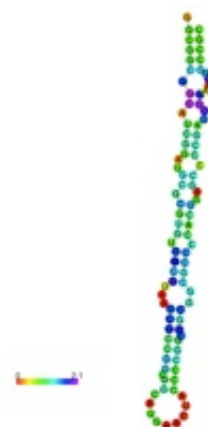

sseq\_416  
MFE-oss -45.2  
MFE-css -36.7

SeqID  
417

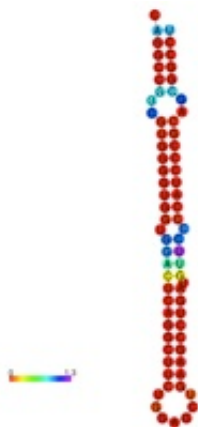

fseq\_417  
MFE-oss -49.3  
MFE-css -48.9

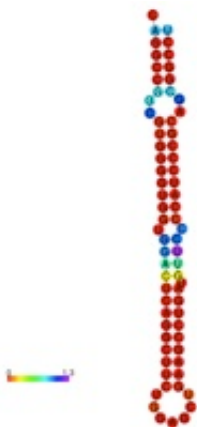

qseq\_417  
MFE-oss -49.3  
MFE-css -48.9

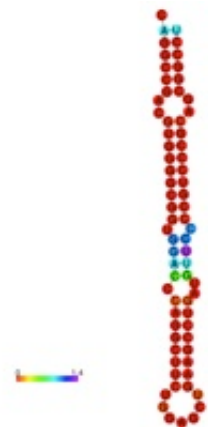

sseq\_417  
MFE-oss -48.7  
MFE-css -48.7

SeqID  
418

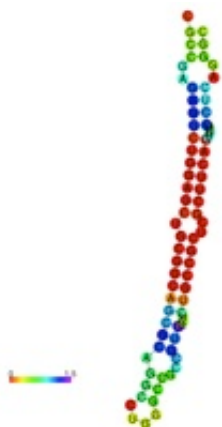

fseq\_418  
MFE-oss -40.8  
MFE-css -40.8

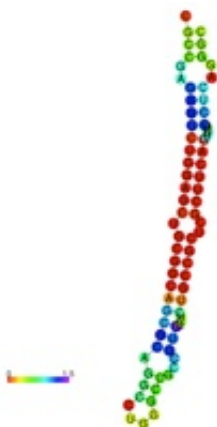

qseq\_418  
MFE-oss -40.8  
MFE-css -40.8

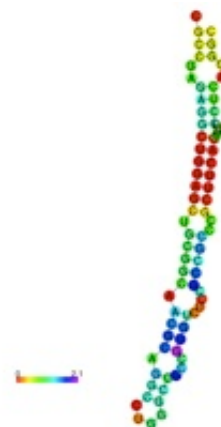

sseq\_418  
MFE-oss -37.5  
MFE-css -32.53

SeqID  
419

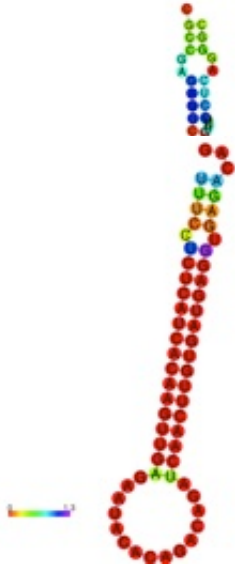

fseq\_421  
MFE-oss -25.96  
MFE-css -25.96

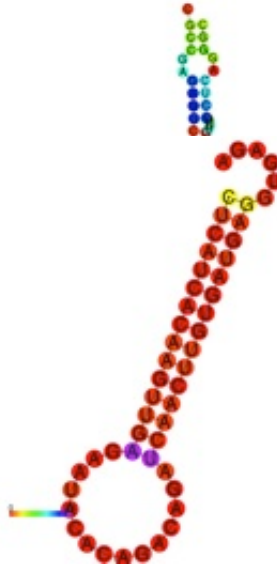

qseq\_421  
MFE-oss -22.56  
MFE-css -22.56

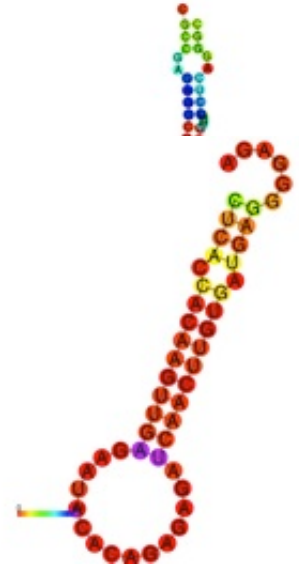

sseq\_421  
MFE-oss -17.96  
MFE-css -17.96

SeqID  
421

SeqID  
424

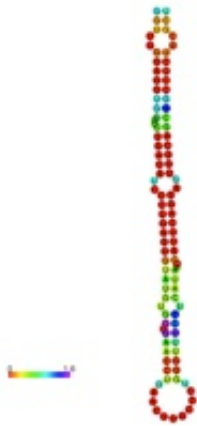

fseq\_424  
MFE-oss -45.5  
MFE-css -43.7

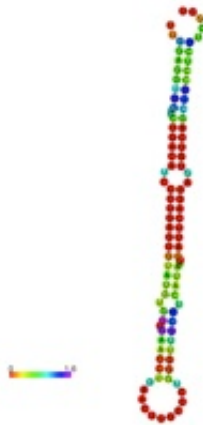

qseq\_424  
MFE-oss -43.1  
MFE-css -44.3

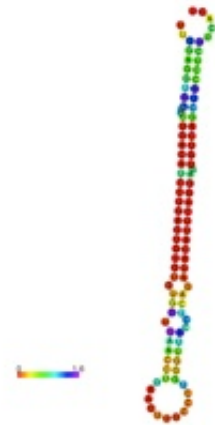

sseq\_424  
MFE-oss -44.6  
MFE-css -46

SeqID  
426

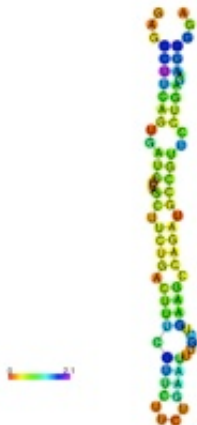

fseq\_426  
MFE-oss -18.3  
MFE-css -15.6

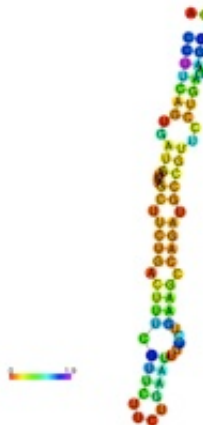

qseq\_426  
MFE-oss -18.1  
MFE-css -15.4

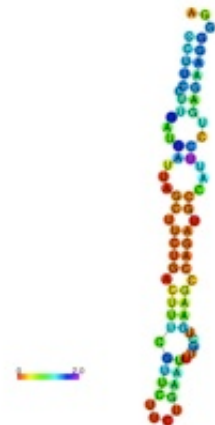

sseq\_426  
MFE-oss -15.5  
MFE-css -9.2

SeqID  
427

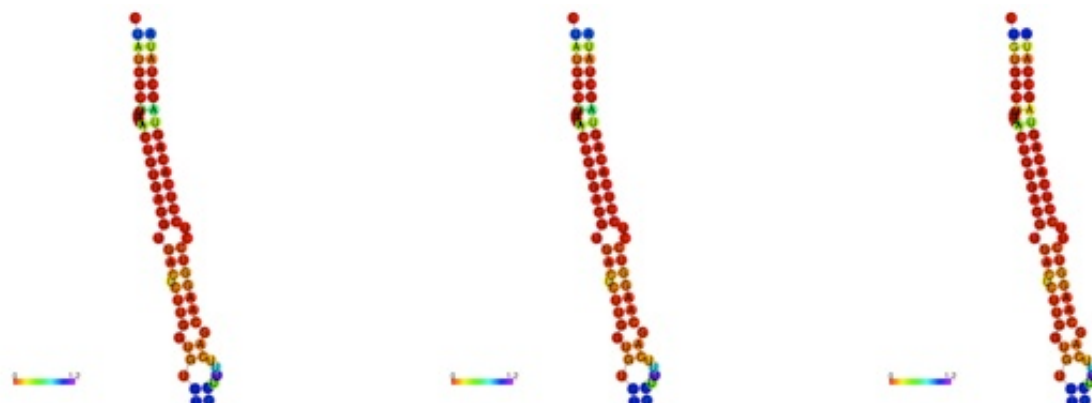

SeqID  
428

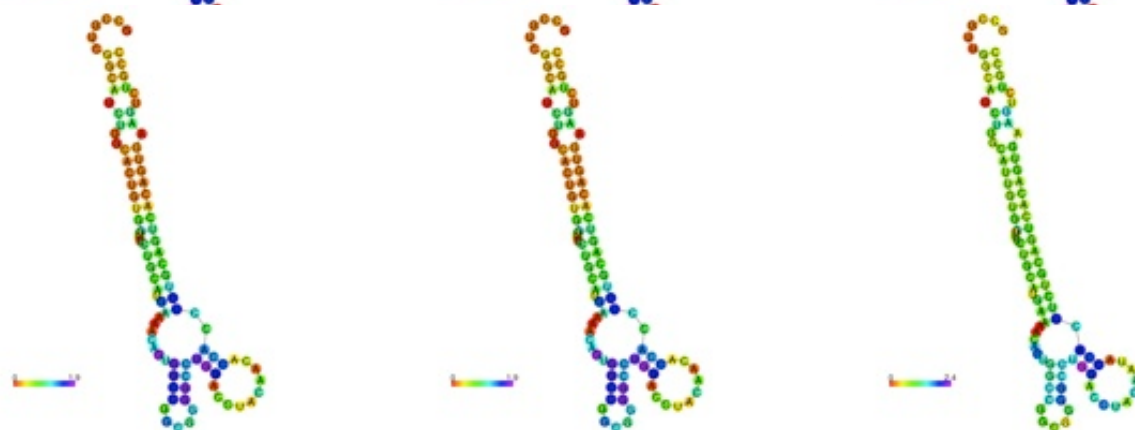

fseq\_428  
MFE-oss -31.6  
MFE-css -31.1

qseq\_428  
MFE-oss -31.6  
MFE-css -31.1

sseq\_428  
MFE-oss -29.9  
MFE-css -25.41

SeqID  
429

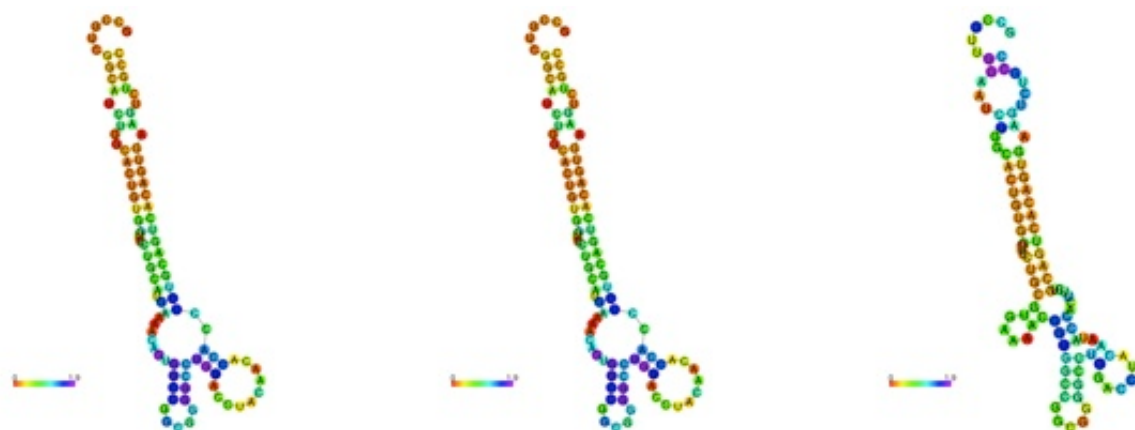

fseq\_429  
MFE-oss -31.6  
MFE-css -31.1

qseq\_429  
MFE-oss -31.6  
MFE-css -31.1

sseq\_429  
MFE-oss -30.1  
MFE-css -28.4

SeqID  
430

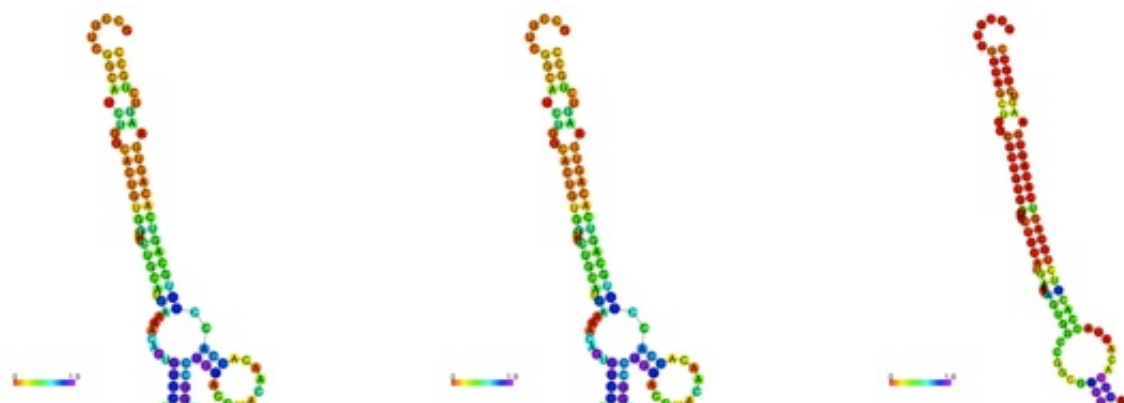

fseq\_430  
MFE-oss -31.6  
MFE-css -31.1

qseq\_430  
MFE-oss -31.6  
MFE-css -31.1

sseq\_430  
MFE-oss -37.8  
MFE-css -37.8

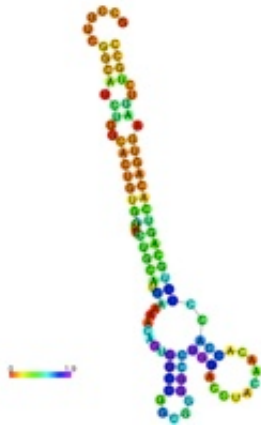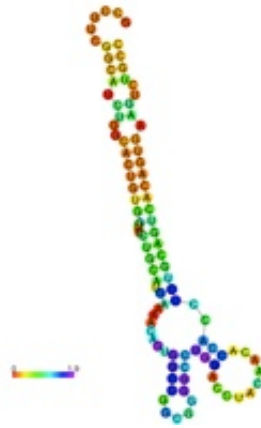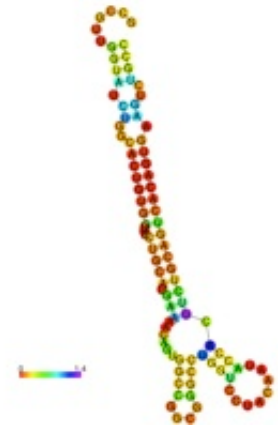

SeqID  
431

fseq\_431  
MFE-oss -31.6  
MFE-css -31.1

qseq\_431  
MFE-oss -31.6  
MFE-css -31.1

sseq\_431  
MFE-oss -32.2  
MFE-css -32.2

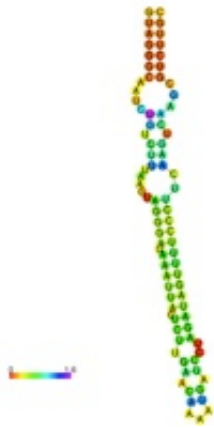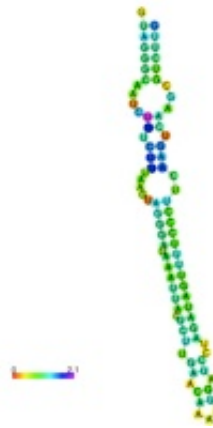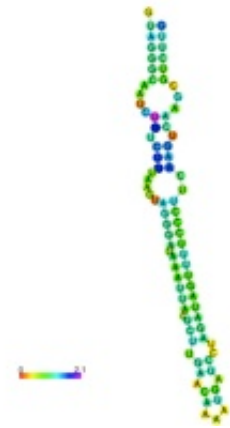

SeqID  
433

fseq\_433  
MFE-oss -18.4  
MFE-css -18.7

qseq\_433  
MFE-oss -15.6  
MFE-css -15.6

sseq\_433  
MFE-oss -15.6  
MFE-css -15.6

SeqID  
434

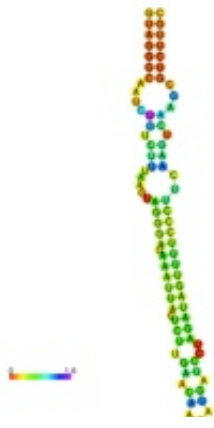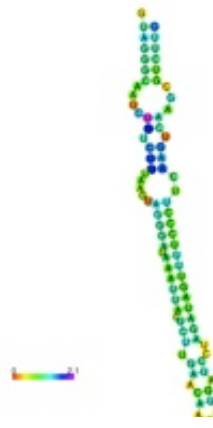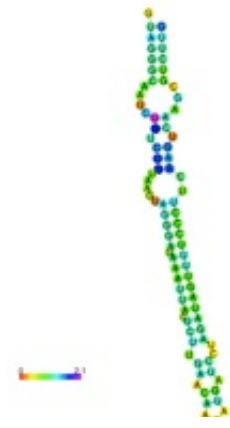

fseq\_434  
MFE-oss -18.4  
MFE-css -18.7

qseq\_434  
MFE-oss -15.6  
MFE-css -15.6

sseq\_434  
MFE-oss -15.6  
MFE-css -15.6

SeqID  
435

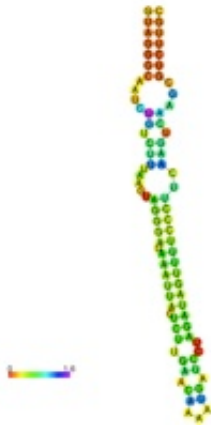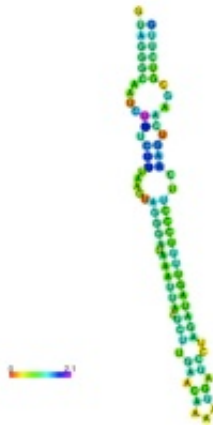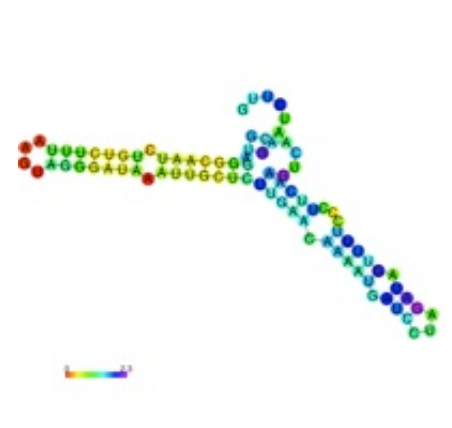

fseq\_435  
MFE-oss -18.4

qseq\_435  
MFE-oss -15.6

sseq\_435  
MFE-oss -16.6

SeqID  
436

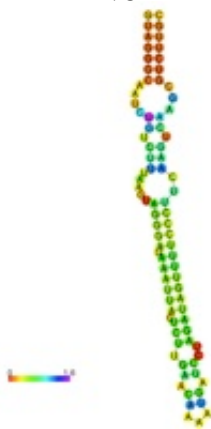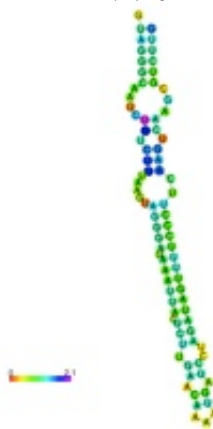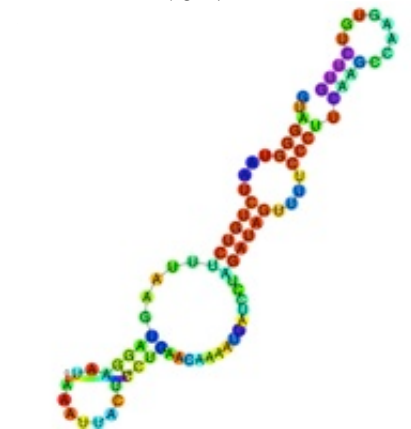

fseq\_436  
MFE-oss -18.4  
MFE-css -18.7

qseq\_436  
MFE-oss -15.6  
MFE-css -15.6

sseq\_436  
MFE-oss -13.81  
MFE-css -14.51

SeqID  
437

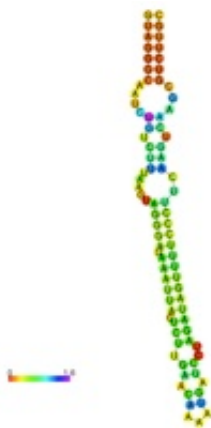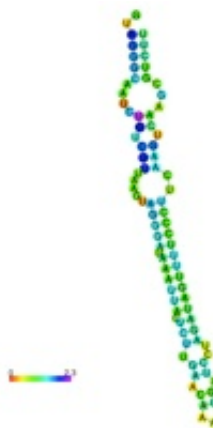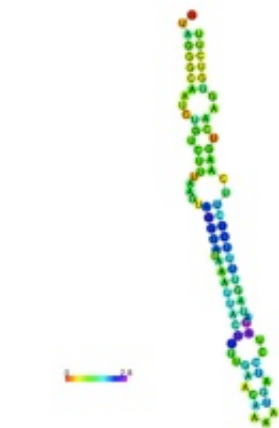

fseq\_437  
MFE-oss -18.4  
MFE-css -18.7

qseq\_437  
MFE-oss -14.6  
MFE-css -11.8

sseq\_437  
MFE-oss -13  
MFE-css -3.55

SeqID  
438

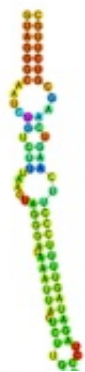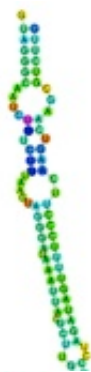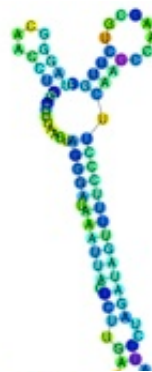

SeqID  
439

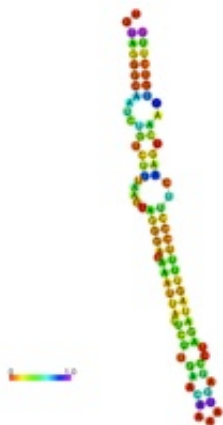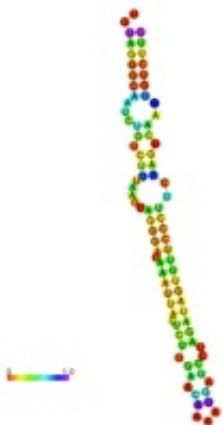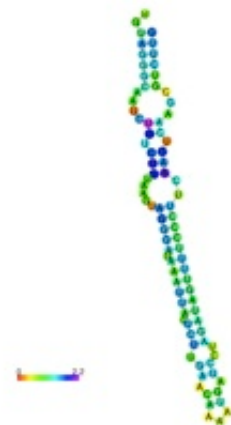

fseq\_439  
MFE-oss -18.5  
MFE-css -18.8

qseq\_439  
MFE-oss -18.5  
MFE-css -18.8

sseq\_439  
MFE-oss -15.6  
MFE-css -12.9

SeqID  
440



fseq\_440  
MFE-oss -18.5  
MFE-css -18.8

qseq\_440  
MFE-oss -18.5  
MFE-css -18.8

sseq\_440  
MFE-oss -15.6  
MFE-css -12.9

SeqID

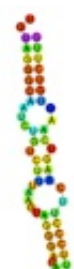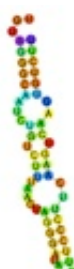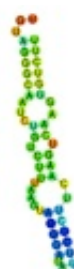

441

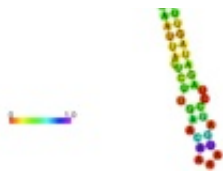

fseq\_441  
MFE-oss -18.5  
MFE-css -18.8

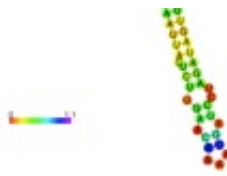

qseq\_441  
MFE-oss -17.5  
MFE-css -17.8

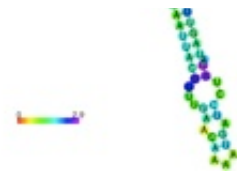

sseq\_441  
MFE-oss -13  
MFE-css -3.55

SeqID  
442

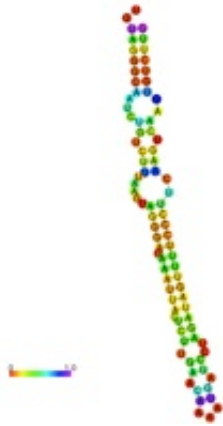

fseq\_442  
MFE-oss -18.5  
MFE-css -18.8

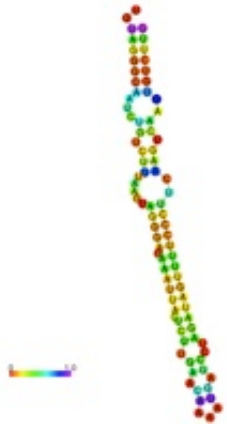

qseq\_442  
MFE-oss -18.5  
MFE-css -18.8

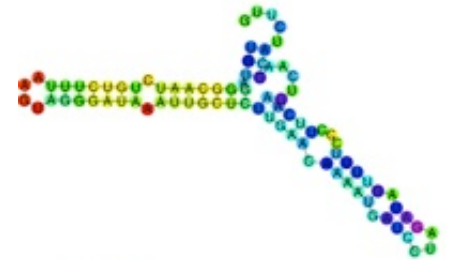

sseq\_442  
MFE-oss -17.1  
MFE-css -11.4

SeqID  
443

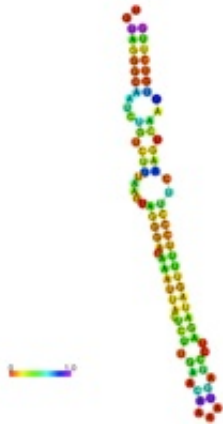

fseq\_443  
MFE-oss -18.5  
MFE-css -18.8

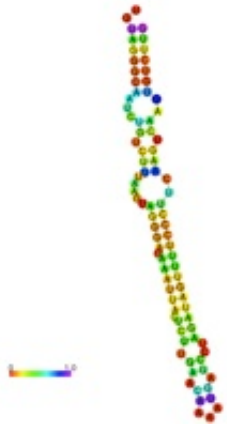

qseq\_443  
MFE-oss -18.5  
MFE-css -18.8

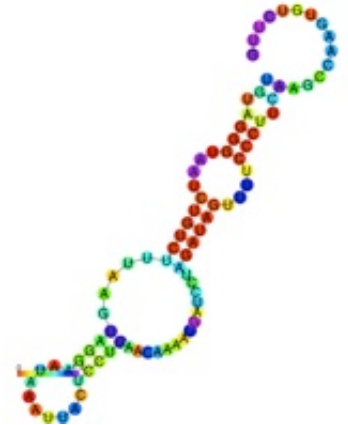

sseq\_443  
MFE-oss -15.21  
MFE-css -15.21

SeqID  
444

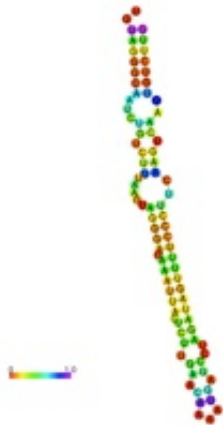

fseq\_444  
MFE-oss -18.5  
MFE-css -18.8

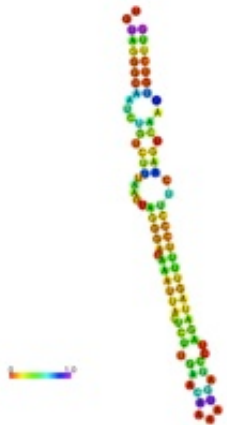

qseq\_444  
MFE-oss -18.5  
MFE-css -18.8

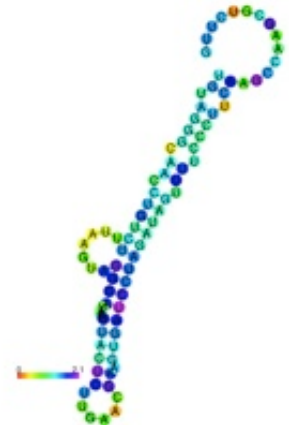

sseq\_444  
MFE-oss -16.51  
MFE-css -10.11

SeqID  
445

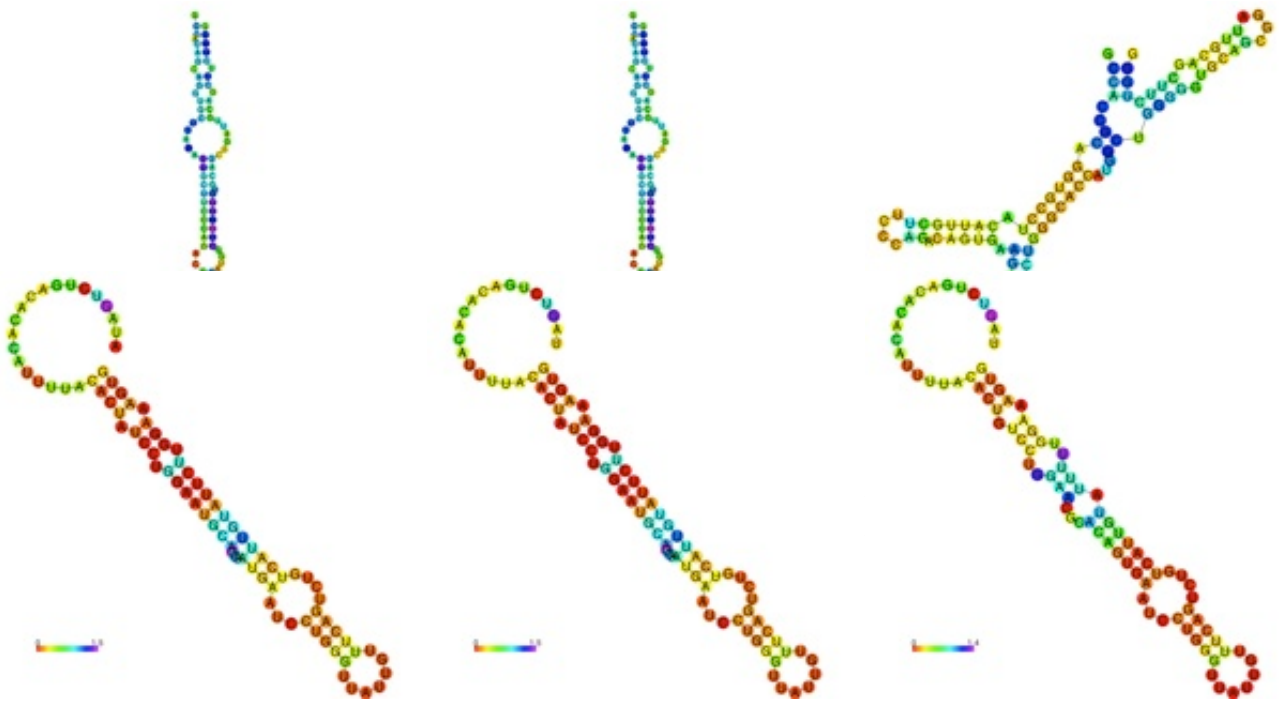

SeqID  
446

fseq\_446  
MFE-oss -22.4  
MFE-css -22.4

qseq\_446  
MFE-oss -22.4  
MFE-css -22.4

sseq\_446  
MFE-oss -18.7  
MFE-css -18.7

SeqID  
447

fseq\_447  
MFE-oss -40.6  
MFE-css -21.32

qseq\_447  
MFE-oss -40.6  
MFE-css -21.32

sseq\_447  
MFE-oss -48.3  
MFE-css -36.4

SeqID  
448

fseq\_448  
MFE-oss -40.6  
MFE-css -21.32

qseq\_448  
MFE-oss -40.6  
MFE-css -21.32

sseq\_448  
MFE-oss -41.9  
MFE-css -29.45



SeqID  
449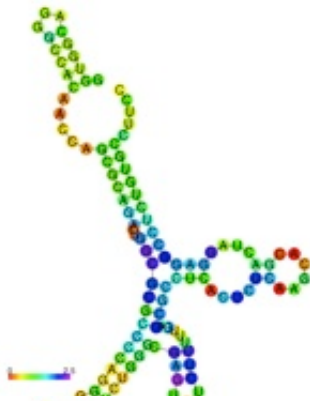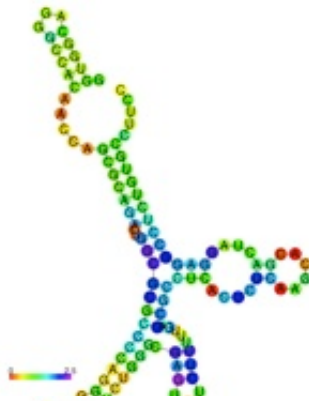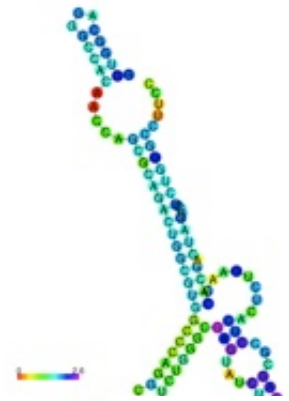SeqID  
450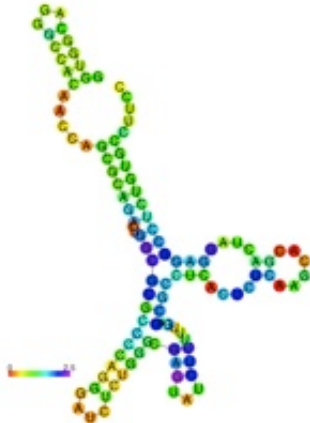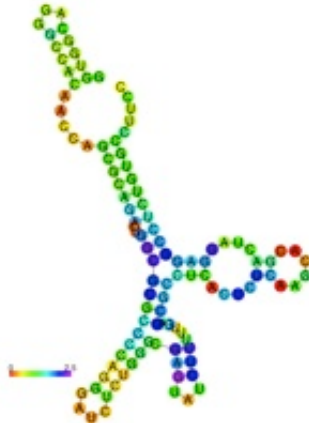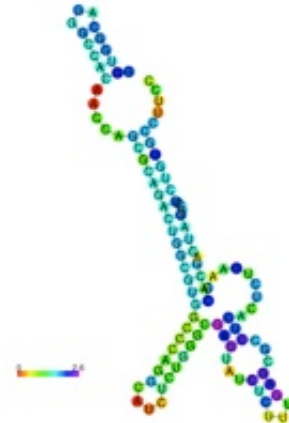fseq\_450  
MFE-oss -40.6  
MFE-css -21.32qseq\_450  
MFE-oss -40.6  
MFE-css -21.32sseq\_450  
MFE-oss -41.9  
MFE-css -8.45SeqID  
451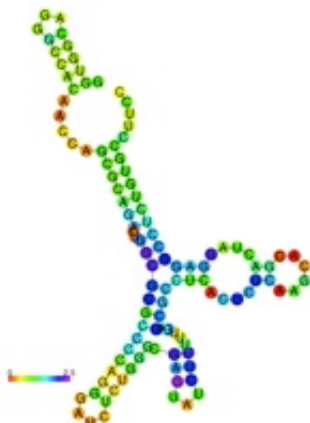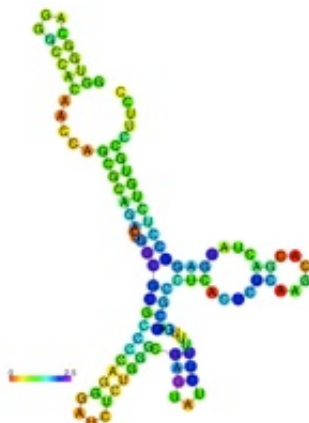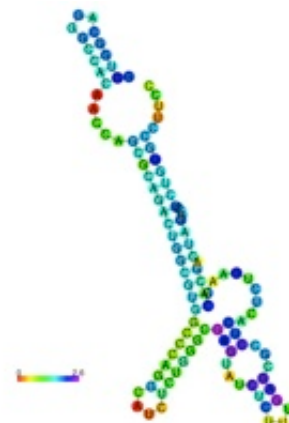fseq\_451  
MFE-oss -40.6  
MFE-css -21.32qseq\_451  
MFE-oss -40.6  
MFE-css -21.32sseq\_451  
MFE-oss -41.9  
MFE-css -8.45

SeqID  
452

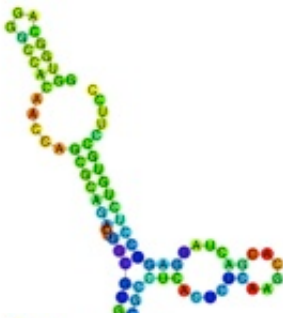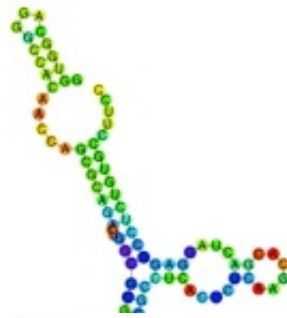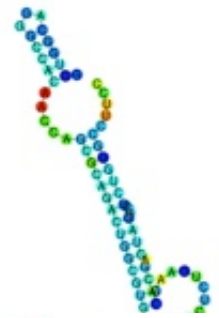

SeqID  
453

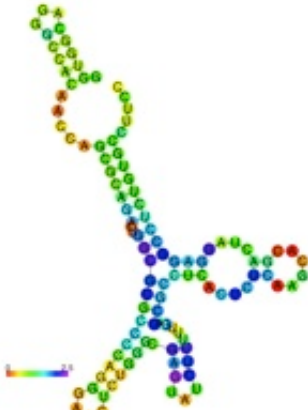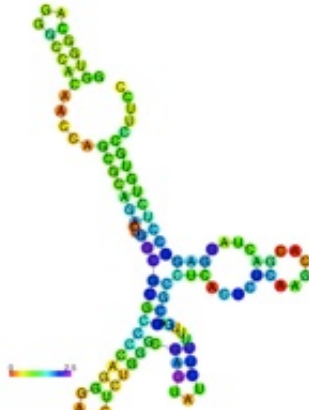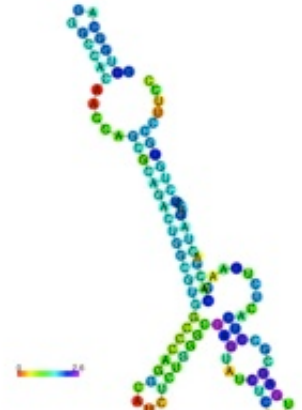

fseq\_453  
MFE-oss -40.6  
MFE-css -21.32

qseq\_453  
MFE-oss -40.6  
MFE-css -21.32

sseq\_453  
MFE-oss -41.9  
MFE-css -8.45

SeqID  
455

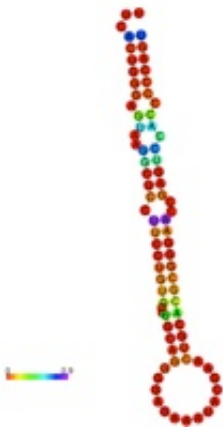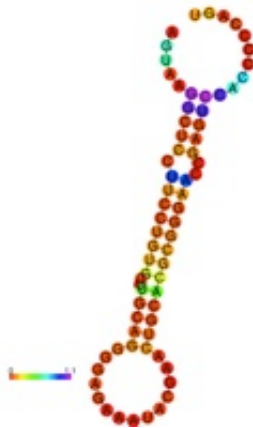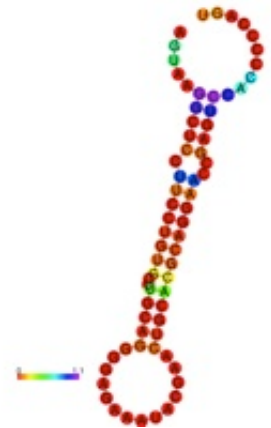

fseq\_455  
MFE-oss -32.74  
MFE-css -32.74

qseq\_455  
MFE-oss -22.14  
MFE-css -22.14

sseq\_455  
MFE-oss -22.84  
MFE-css -22.84

SeqID  
456

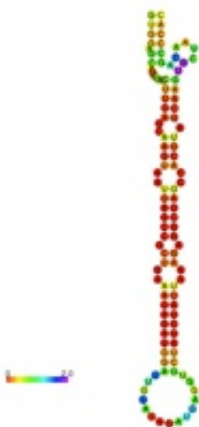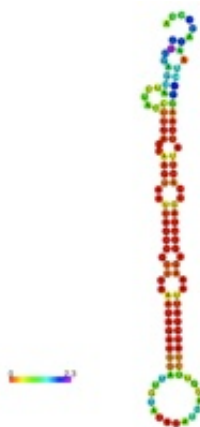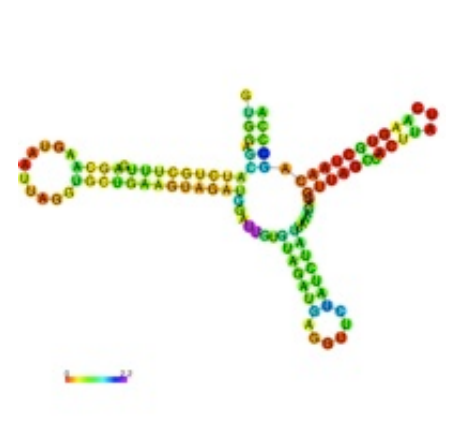

fseq\_456  
MFE-oss -34.66  
MFE-css -34.66

qseq\_456  
MFE-oss -33.06  
MFE-css -33.06

sseq\_456  
MFE-oss -33.57  
MFE-css -33.57

MFE-oss -34.66  
MFE-css -34.5

MFE-oss -32.96  
MFE-css -28.76

MFE-oss -30.5  
MFE-css -19.2

SeqID  
457

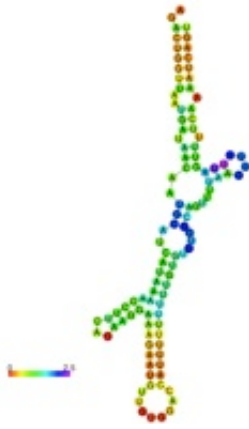

fseq\_457  
MFE-oss -19.8  
MFE-css -10.67

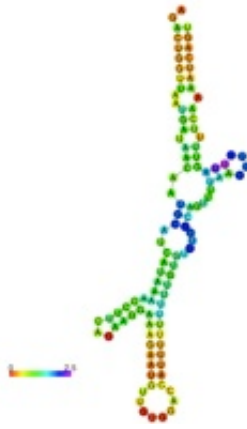

qseq\_457  
MFE-oss -19.8  
MFE-css -10.67

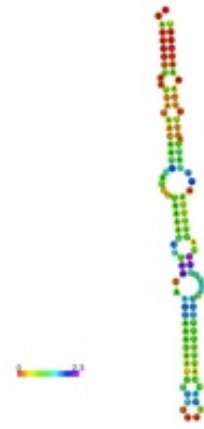

sseq\_457  
MFE-oss -19.6  
MFE-css -16.73

SeqID  
458

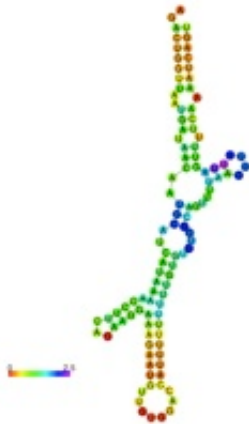

fseq\_458  
MFE-oss -19.8  
MFE-css -10.67

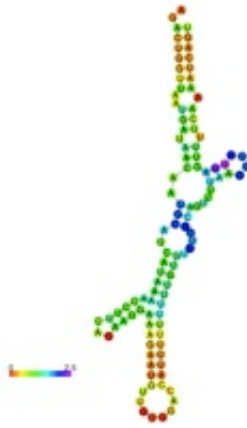

qseq\_458  
MFE-oss -19.8  
MFE-css -10.67

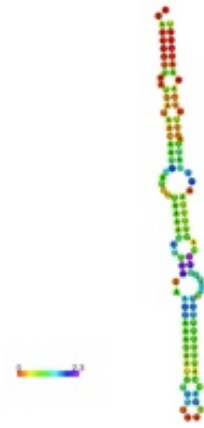

sseq\_458  
MFE-oss -19.6  
MFE-css -16.73

SeqID  
459

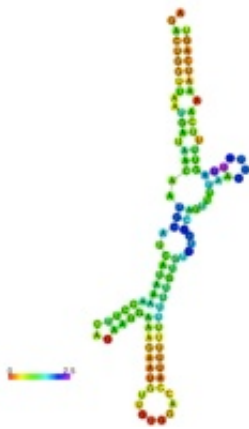

fseq\_459  
MFE-oss -19.8  
MFE-css -10.67

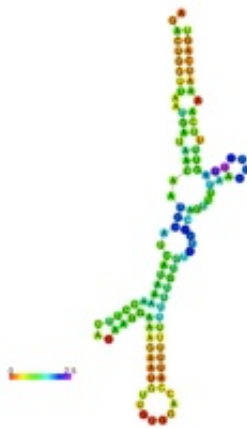

qseq\_459  
MFE-oss -19.8  
MFE-css -10.67

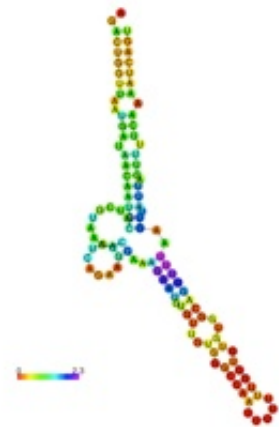

sseq\_459  
MFE-oss -23.8  
MFE-css -21.6



MFE-oss  $\bar{-29.4}$   
MFE-css  $-29.4$

MFE-oss  $\bar{-29.4}$   
MFE-css  $-29.4$

MFE-oss  $\bar{-25.2}$   
MFE-css  $-23.54$

SeqID  
464

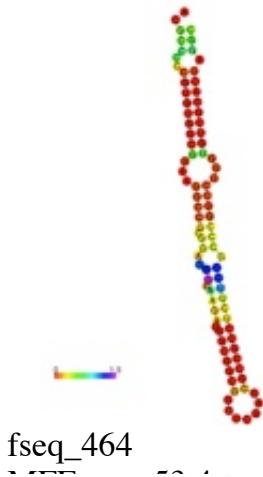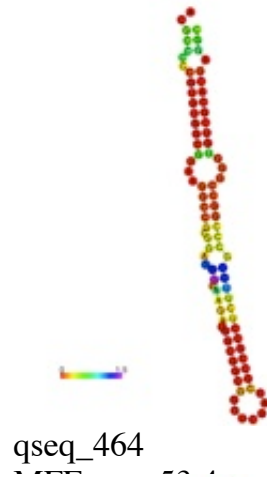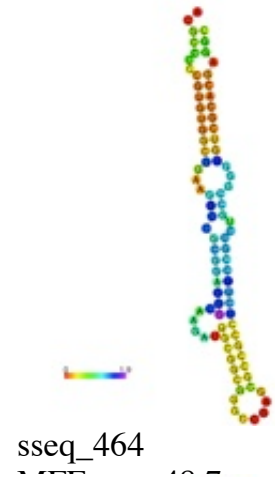

SeqID  
465

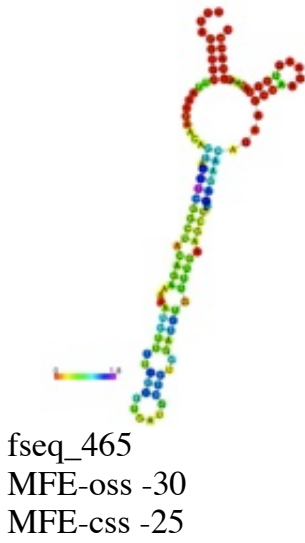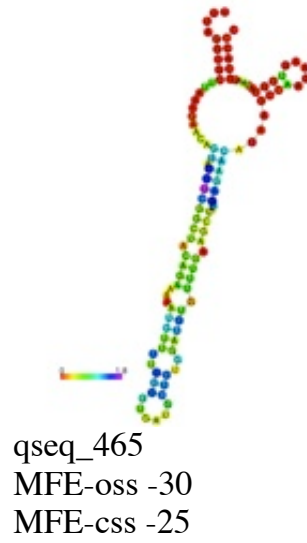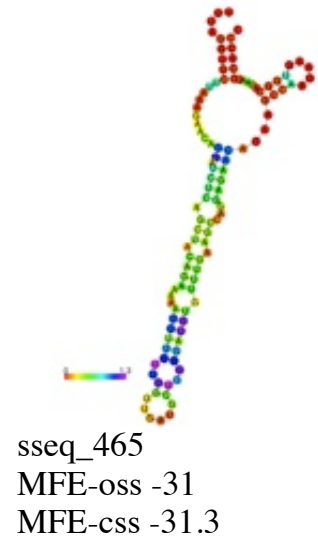

SeqID  
466

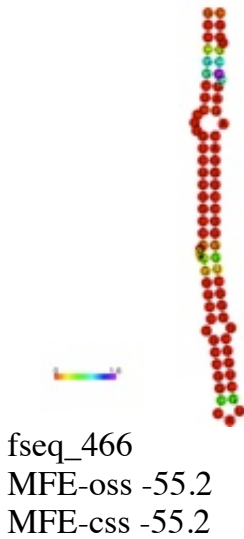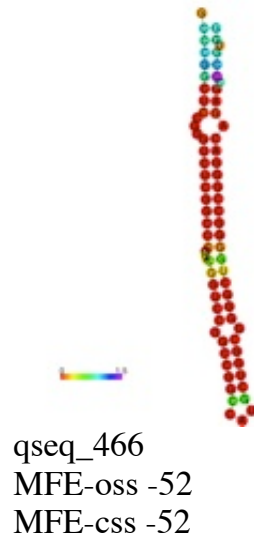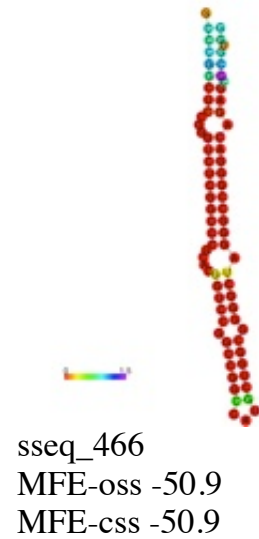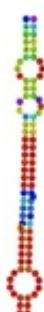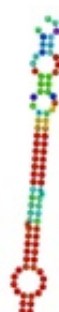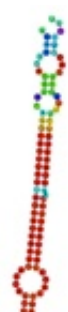

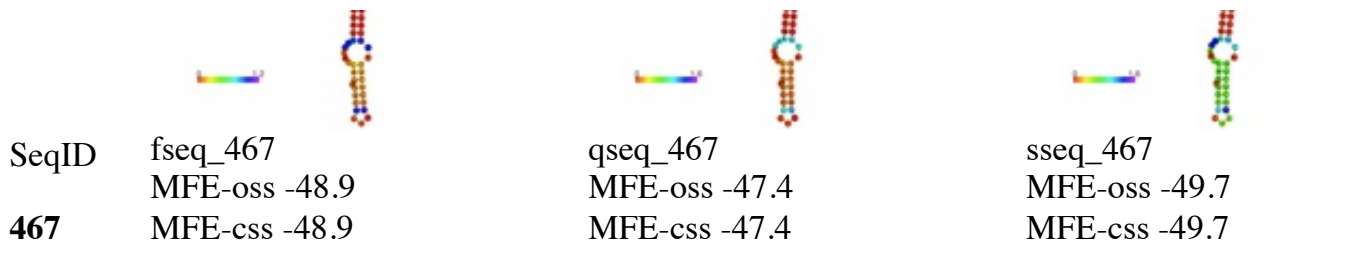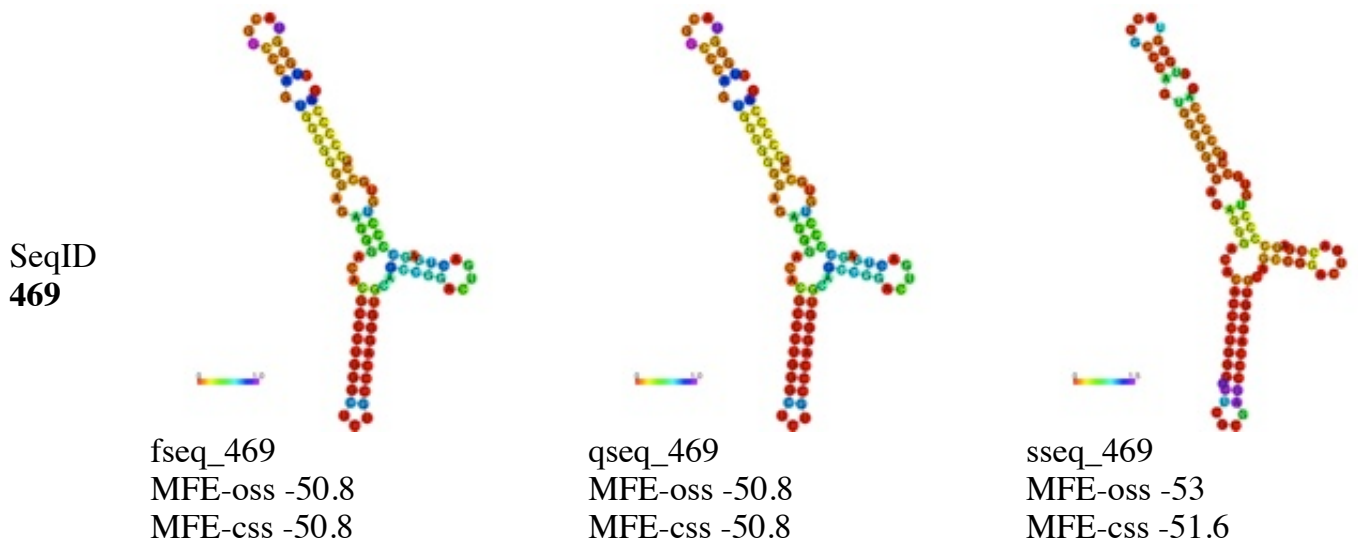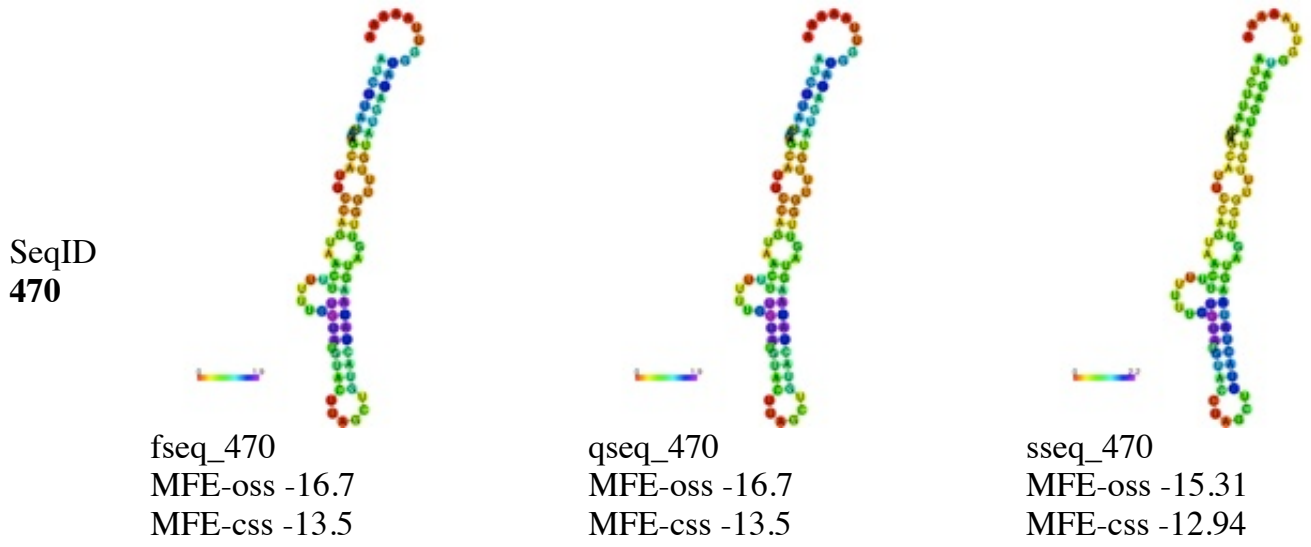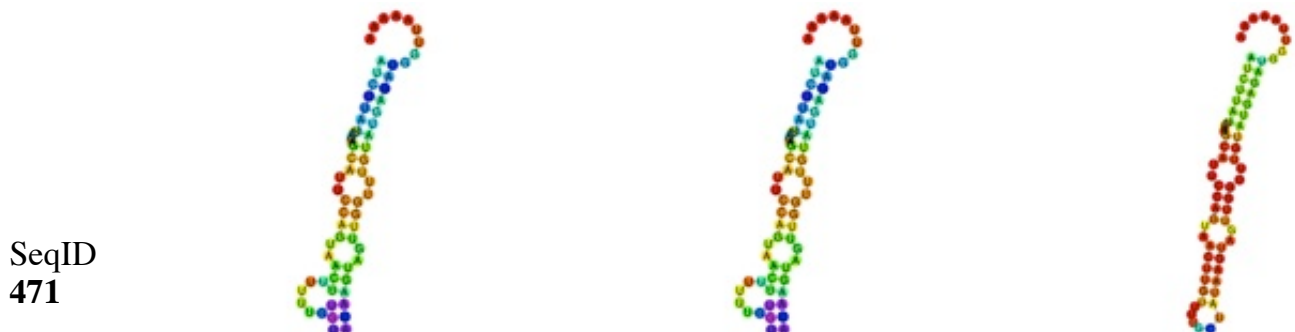

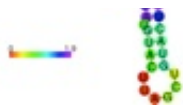

fseq\_471  
MFE-oss -16.7  
MFE-css -13.5

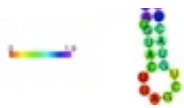

qseq\_471  
MFE-oss -16.7  
MFE-css -13.5

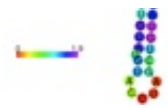

sseq\_471  
MFE-oss -17.7  
MFE-css -16

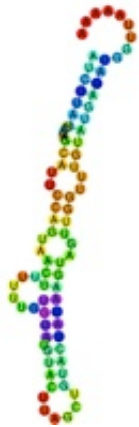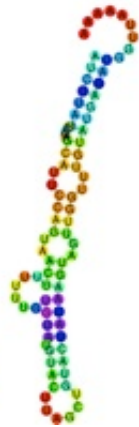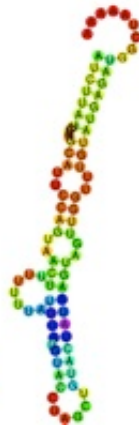

SeqID  
472

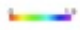

fseq\_472  
MFE-oss -16.7  
MFE-css -13.5



qseq\_472  
MFE-oss -16.7  
MFE-css -13.5

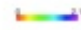

sseq\_472  
MFE-oss -15.31  
MFE-css -14.64

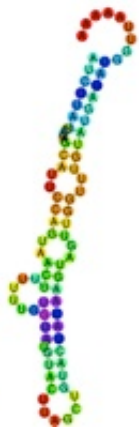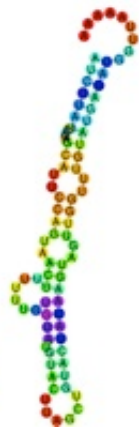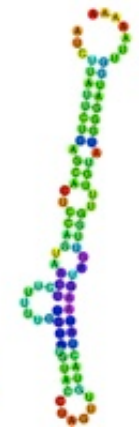

SeqID  
473

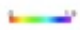

fseq\_473  
MFE-oss -16.7  
MFE-css -13.5



qseq\_473  
MFE-oss -16.7  
MFE-css -13.5

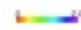

sseq\_473  
MFE-oss -16.01  
MFE-css -14.3

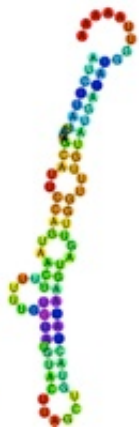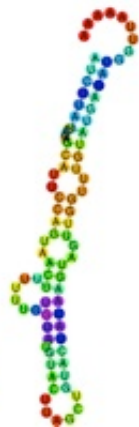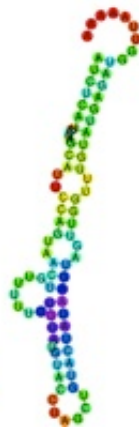

SeqID  
474



fseq\_474  
MFE-oss -16.7



qseq\_474  
MFE-oss -16.7

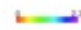

sseq\_474  
MFE-oss -17.51

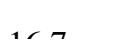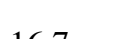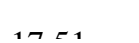

MFE-oss -16.7  
MFE-css -13.5

MFE-oss -16.7  
MFE-css -13.5

MFE-oss -17.51  
MFE-css -13.57

SeqID  
475

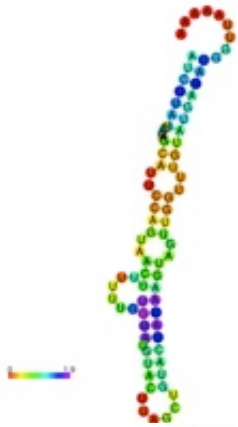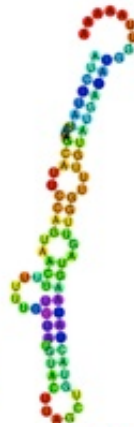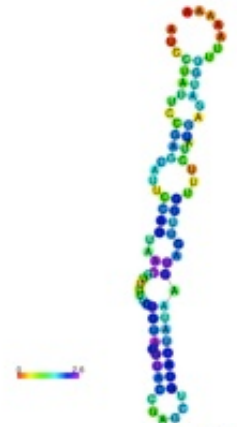

SeqID  
476

fseq\_476  
MFE-oss -34.4  
MFE-css -34.4

qseq\_476  
MFE-oss -34.4  
MFE-css -34.4

sseq\_476  
MFE-oss -33.6  
MFE-css -33.6

SeqID  
477

fseq\_477  
MFE-oss -12.1  
MFE-css -10.5

qseq\_477  
MFE-oss -12.1  
MFE-css -10.5

sseq\_477  
MFE-oss -8.3  
MFE-css -8.3



SeqID  
478

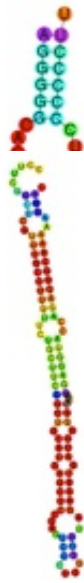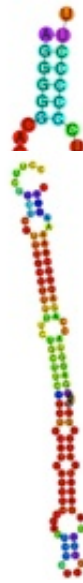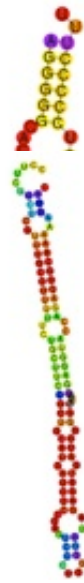

SeqID  
479

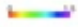

fseq\_479  
MFE-oss -39.4  
MFE-css -39.4

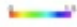

qseq\_479  
MFE-oss -39.4  
MFE-css -39.4

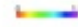

sseq\_479  
MFE-oss -39.4  
MFE-css -39.4

SeqID  
480

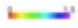

fseq\_480  
MFE-oss -37.7  
MFE-css -38.4

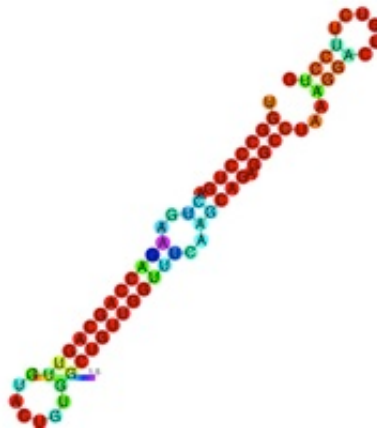

qseq\_480  
MFE-oss -33  
MFE-css -33.7

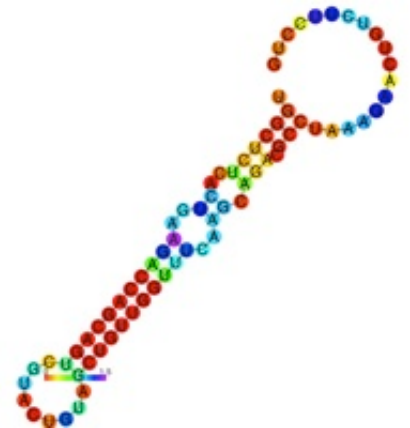

sseq\_480  
MFE-oss -21.6  
MFE-css -19.8

SeqID  
481

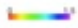

fseq\_481  
MFE-oss -37.7  
MFE-css -38.4

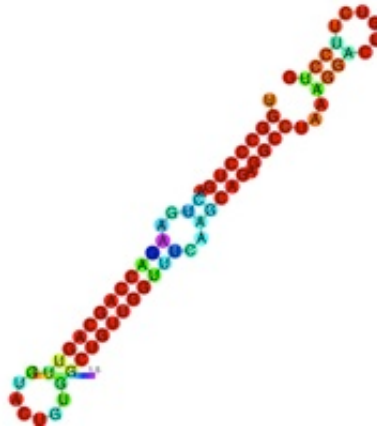

qseq\_481  
MFE-oss -33  
MFE-css -33.7

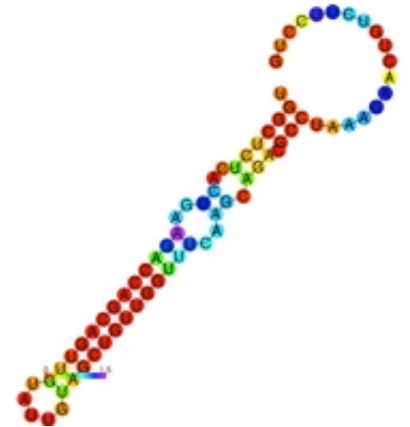

sseq\_481  
MFE-oss -24.2  
MFE-css -22.4

SeqID  
482

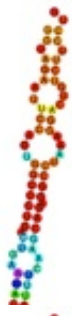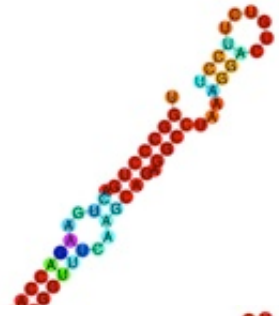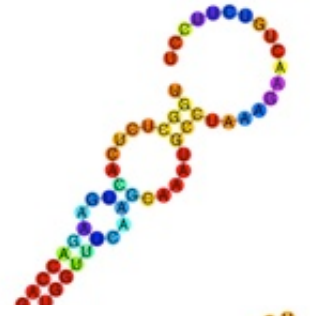

SeqID  
483

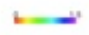

fseq\_483  
MFE-oss -37.7  
MFE-css -38.4

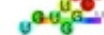

qseq\_483  
MFE-oss -33  
MFE-css -33.7

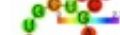

sseq\_483  
MFE-oss -22  
MFE-css -17.1

SeqID  
484

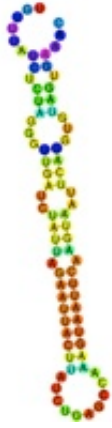

fseq\_484  
MFE-oss -14.9  
MFE-css -14.9

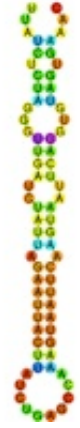

qseq\_484  
MFE-oss -14.9  
MFE-css -14.9

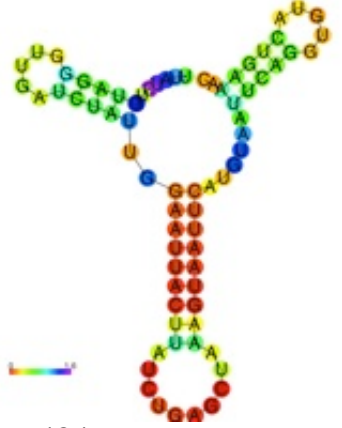

sseq\_484  
MFE-oss -13.8  
MFE-css -14.3

SeqID  
485

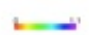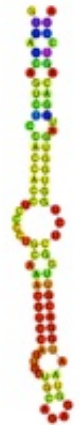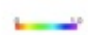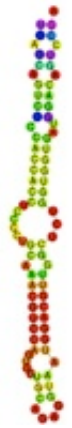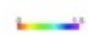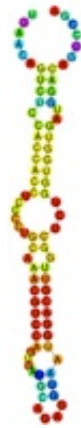

fseq\_485  
MFE-oss -33.2  
MFE-css -33.6

qseq\_485  
MFE-oss -33  
MFE-css -33.6

sseq\_485  
MFE-oss -31.8  
MFE-css -30.9

SeqID  
486

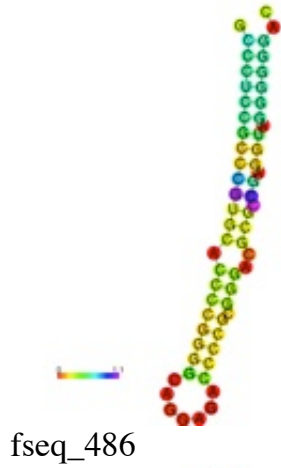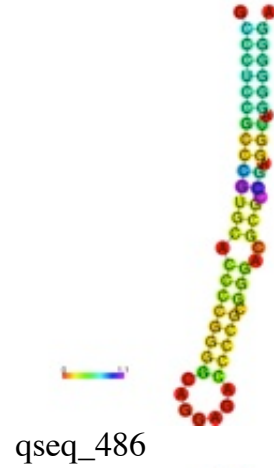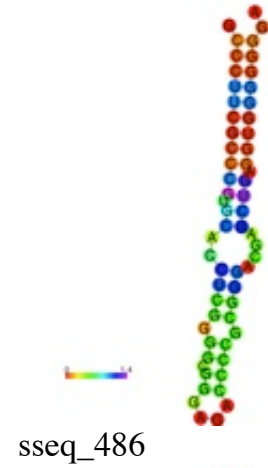

SeqID  
487

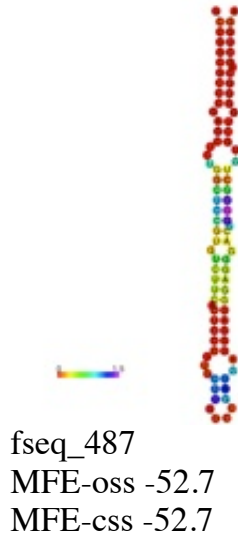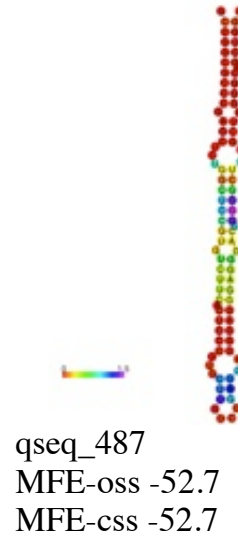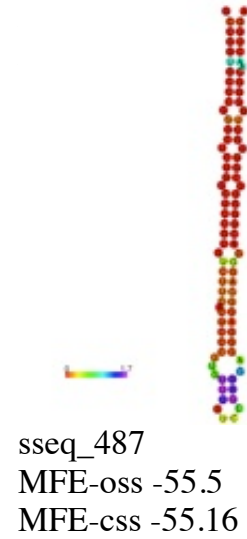

SeqID  
488

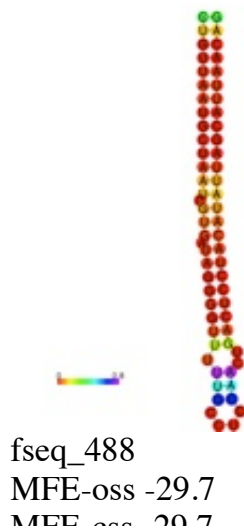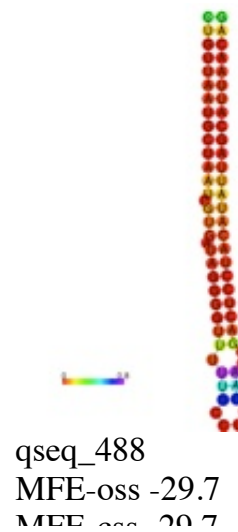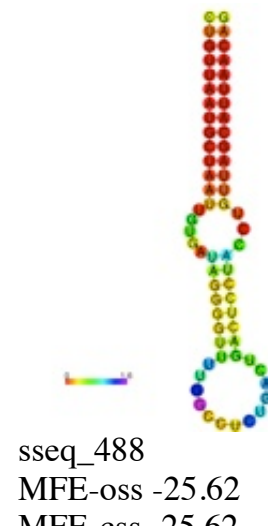

SeqID  
489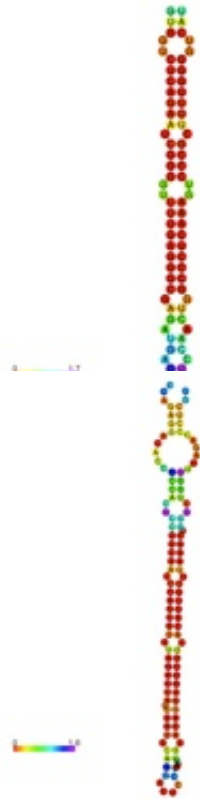fseq\_490  
MFE-oss -42.9  
MFE-css -41.2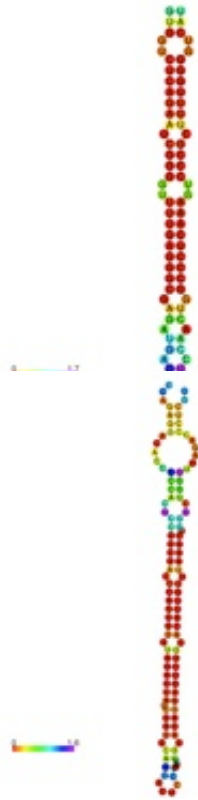qseq\_490  
MFE-oss -42.9  
MFE-css -41.2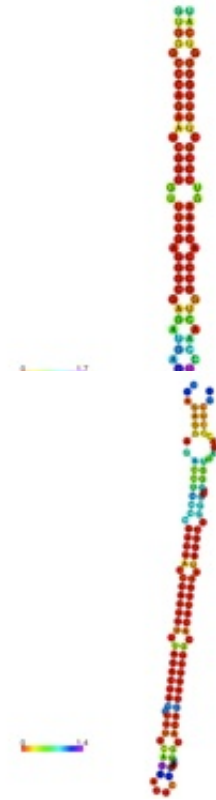sseq\_490  
MFE-oss -44.8  
MFE-css -43.1SeqID  
490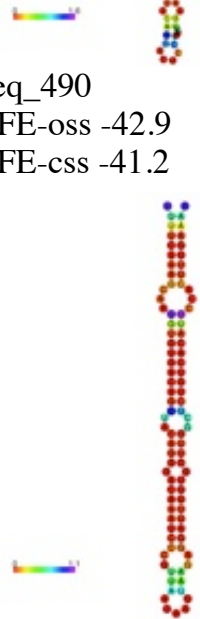fseq\_491  
MFE-oss -39.4  
MFE-css -39.4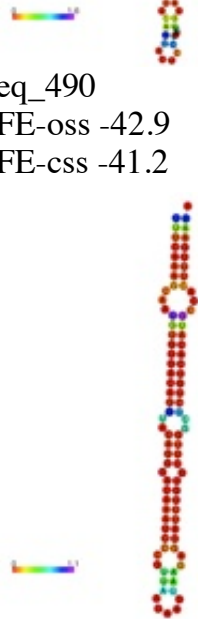qseq\_491  
MFE-oss -39.2  
MFE-css -39.2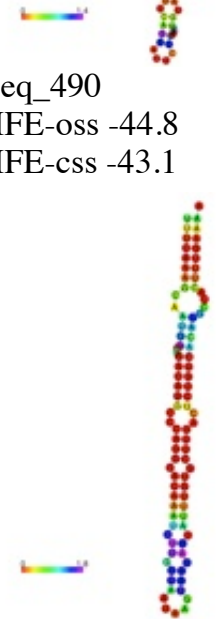sseq\_491  
MFE-oss -28  
MFE-css -24.51SeqID  
491

SeqID  
492

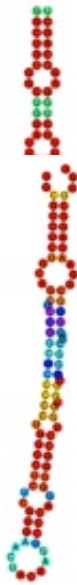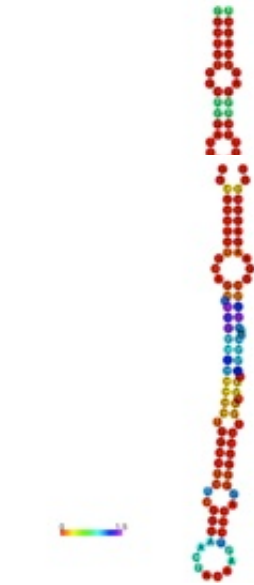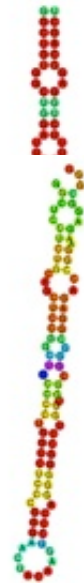

SeqID  
493

fseq\_493  
MFE-oss -53.1  
MFE-css -52.9

qseq\_493  
MFE-oss -53.1  
MFE-css -52.9

sseq\_493  
MFE-oss -48.9  
MFE-css -50.5

SeqID  
495

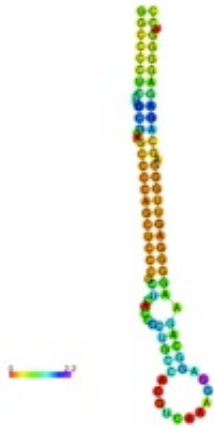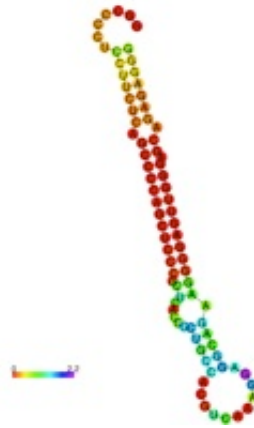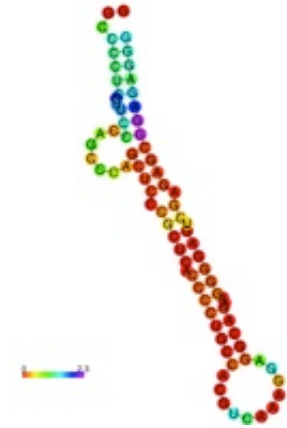

fseq\_495  
MFE-oss -43.7  
MFE-css -41.3

qseq\_495  
MFE-oss -40.4  
MFE-css -40.4

sseq\_495  
MFE-oss -32.41  
MFE-css -29.76

SeqID  
496

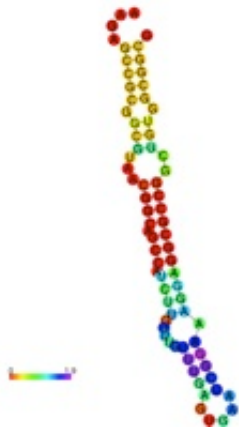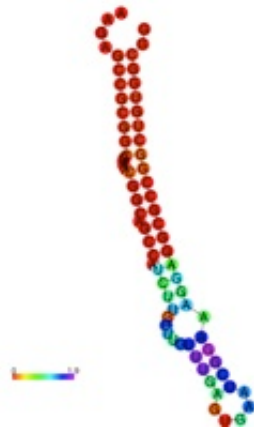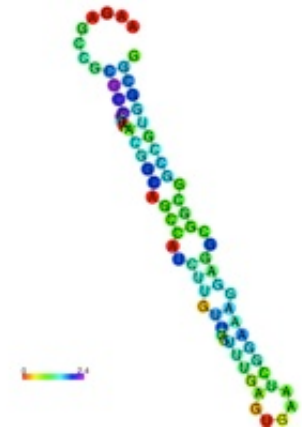

fseq\_496  
MFE-oss -33.1  
MFE-css -29.3

qseq\_496  
MFE-oss -31.5  
MFE-css -27.7

sseq\_496  
MFE-oss -27.1  
MFE-css -19

SeqID  
497

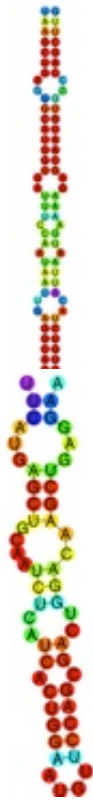

fseq\_498  
MFE-oss -15.3  
MFE-css -15.3

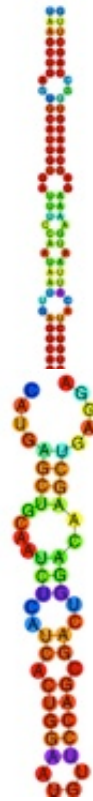

qseq\_498  
MFE-oss -14.6  
MFE-css -14.6

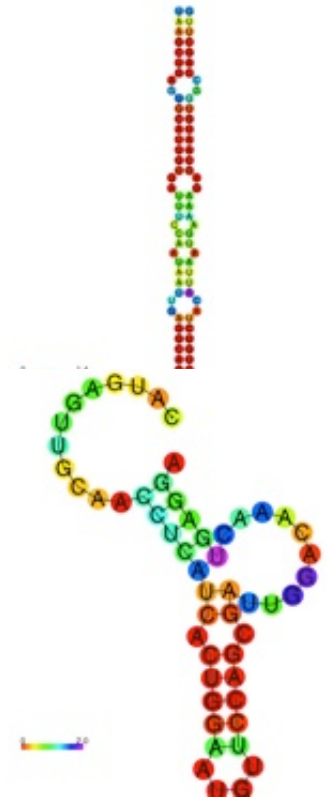

sseq\_498  
MFE-oss -13  
MFE-css -12.5

SeqID  
498

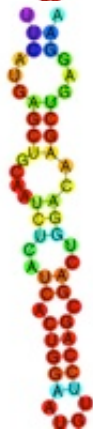

fseq\_498  
MFE-oss -15.3  
MFE-css -15.3

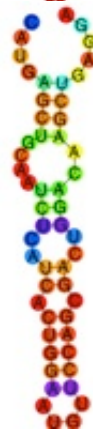

qseq\_498  
MFE-oss -14.6  
MFE-css -14.6

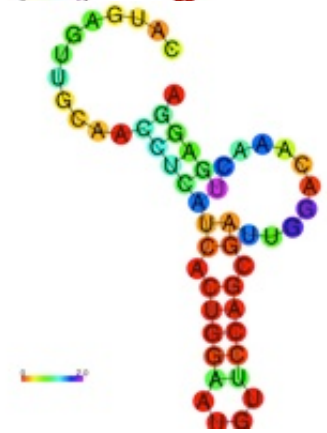

sseq\_498  
MFE-oss -13  
MFE-css -12.5

SeqID  
500

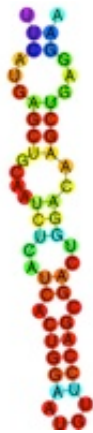

fseq\_500  
MFE-oss -15.3  
MFE-css -15.3

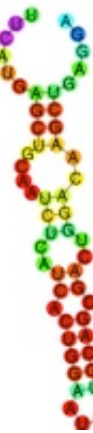

qseq\_500  
MFE-oss -14.6  
MFE-css -14.6

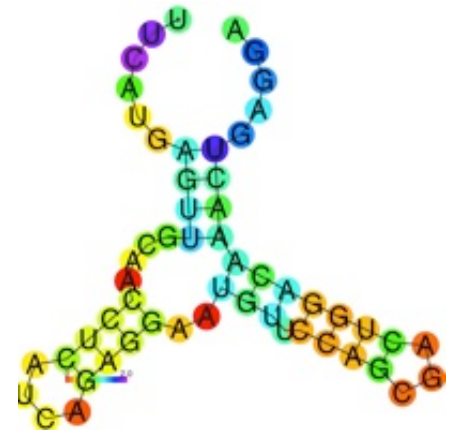

sseq\_500  
MFE-oss -12.3  
MFE-css -12.3

SeqID  
505

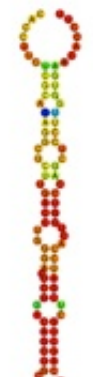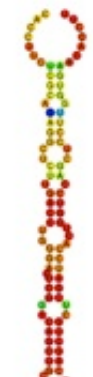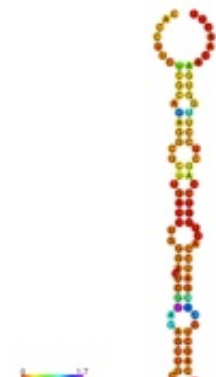



fseq\_505  
MFE-oss -36.4  
MFE-css -34.5



qseq\_505  
MFE-oss -36.4  
MFE-css -34.5



sseq\_505  
MFE-oss -32.3  
MFE-css -30.2

SeqID  
**506**

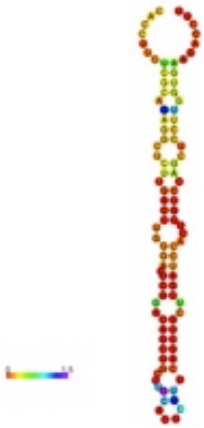

fseq\_506  
MFE-oss -36.4



qseq\_506  
MFE-oss -36.4

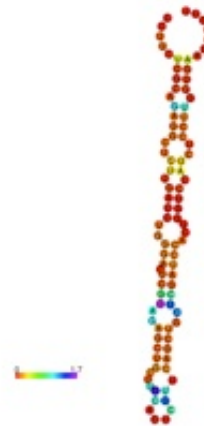

sseq\_506  
MFE-oss -32.3

SeqID  
**507**



fseq\_507  
MFE-oss -61.7  
MFE-css -50.7

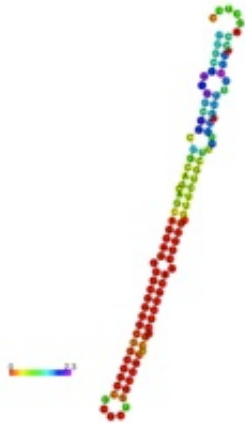

qseq\_507  
MFE-oss -59.9  
MFE-css -55.5



sseq\_507  
MFE-oss -58.4  
MFE-css -48.3

SeqID  
**508**

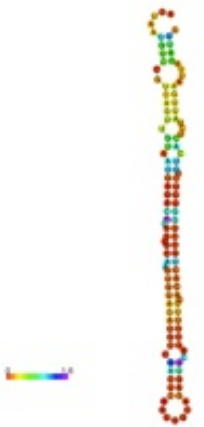

fseq\_508  
MFE-oss -34.5  
MFE-css -34.4



qseq\_508  
MFE-oss -34.5  
MFE-css -34.4



sseq\_508  
MFE-oss -35.1  
MFE-css -35.1

SeqID  
510

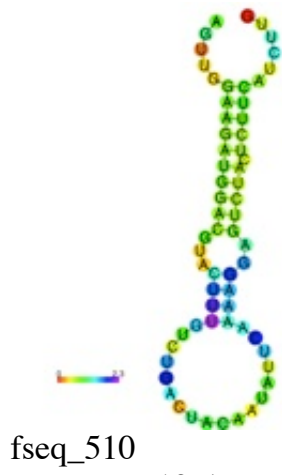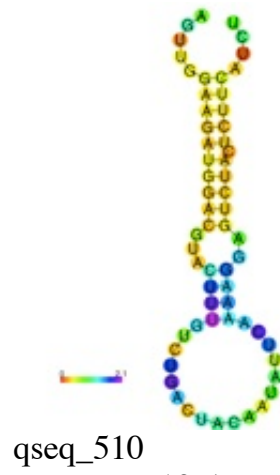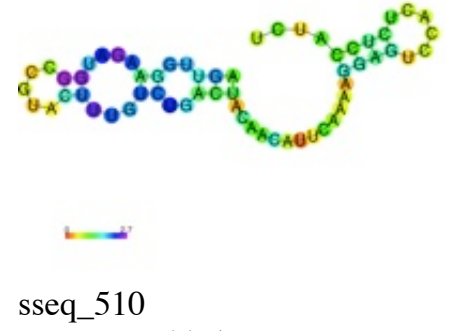

SeqID  
511

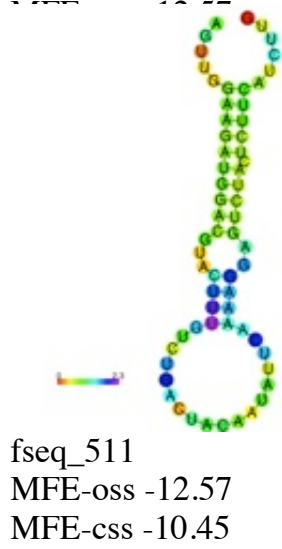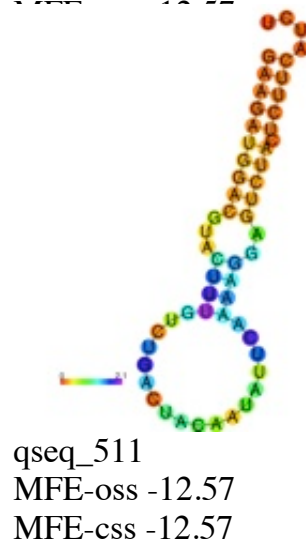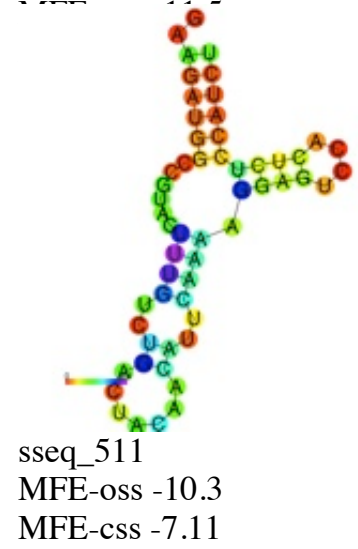

SeqID  
512

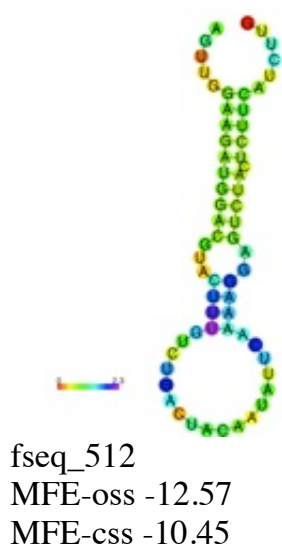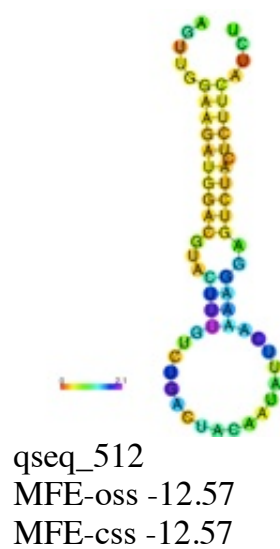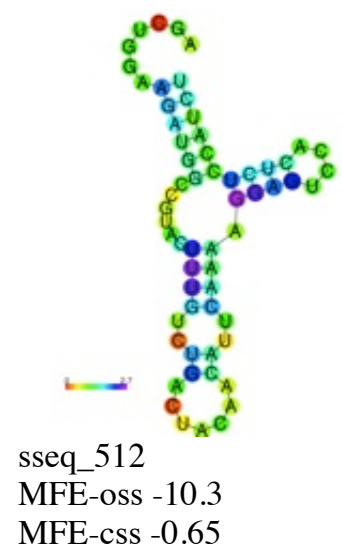



SeqID  
513

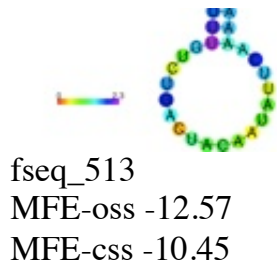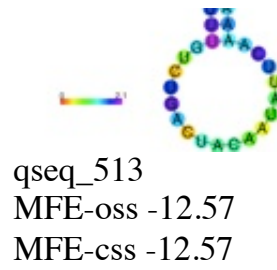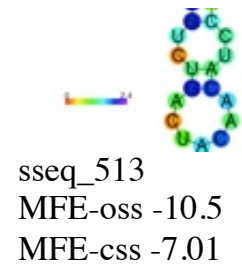

SeqID  
514

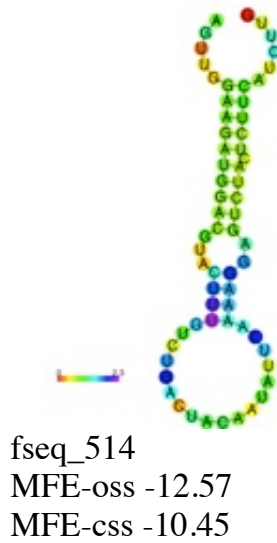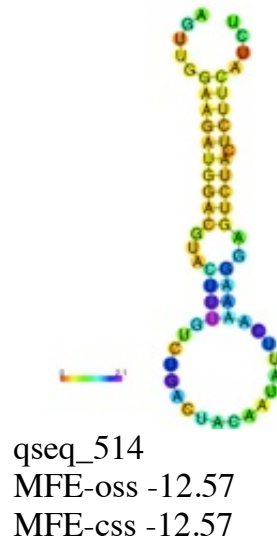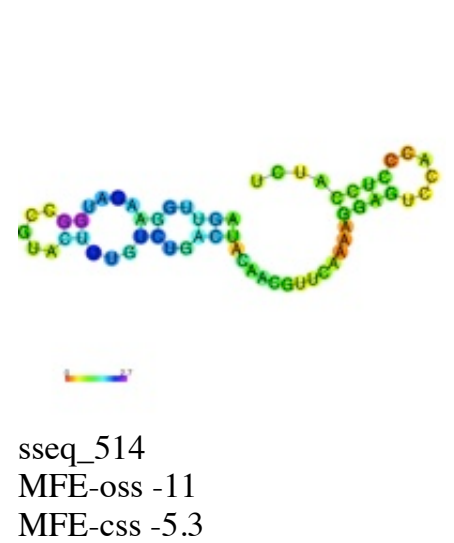

SeqID  
515

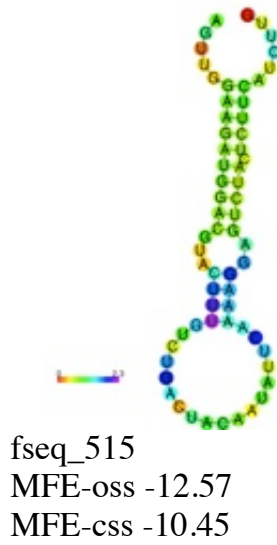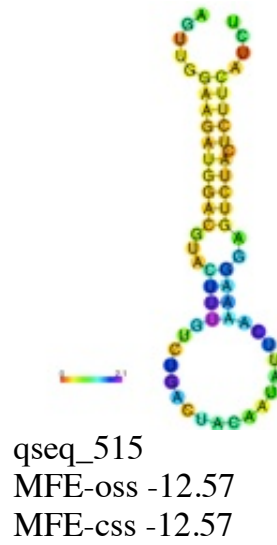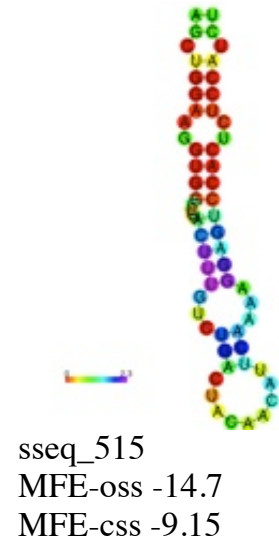

SeqID  
516

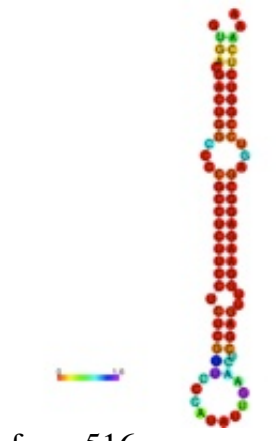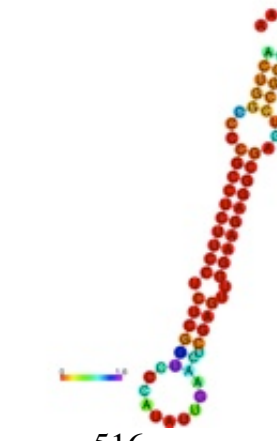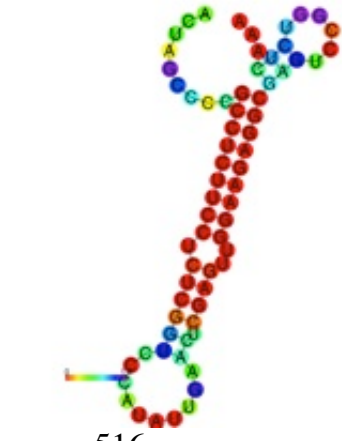

iSEQ\_516  
MFE-oss -36.1  
MFE-css -35.4

qSEQ\_516  
MFE-oss -30  
MFE-css -29.3

sSEQ\_516  
MFE-oss -25.6  
MFE-css -24.1

SeqID  
517

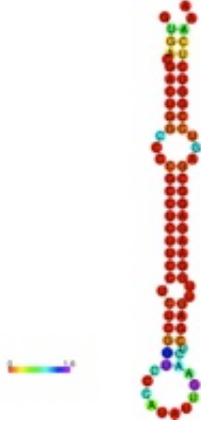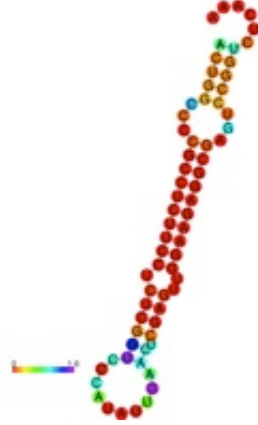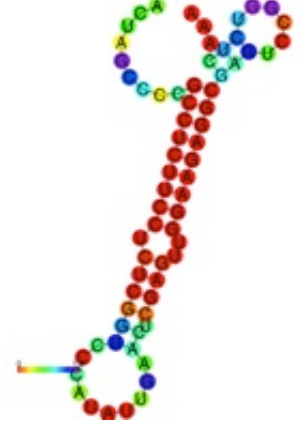

fSEQ\_517  
MFE-oss -36.1  
MFE-css -35.4

qSEQ\_517  
MFE-oss -30  
MFE-css -29.3

sSEQ\_517  
MFE-oss -25.6  
MFE-css -24.1

SeqID  
522

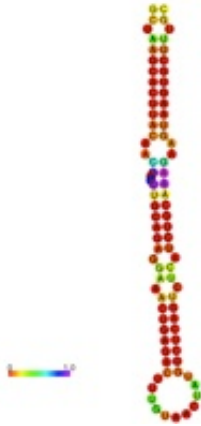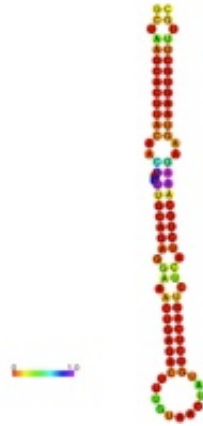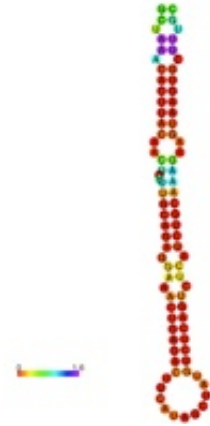

fSEQ\_522  
MFE-oss -40.8  
MFE-css -40.8

qSEQ\_522  
MFE-oss -40.8  
MFE-css -40.8

sSEQ\_522  
MFE-oss -34.2  
MFE-css -33.9

SeqID  
523

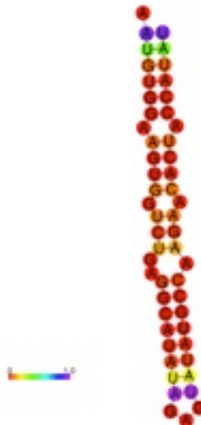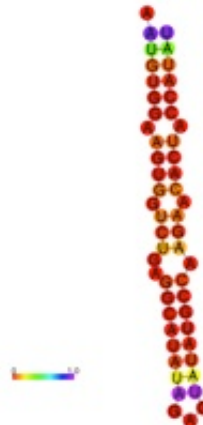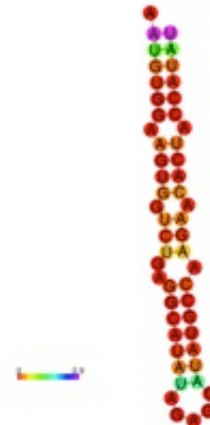

fSEQ\_523  
MFE-oss -23  
MFE-css -23

qSEQ\_523  
MFE-oss -23  
MFE-css -23

sSEQ\_523  
MFE-oss -22.6  
MFE-css -22.6

SeqID  
524

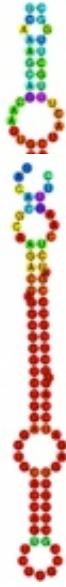

fseq\_525  
MFE-oss -37.4  
MFE-css -37.4

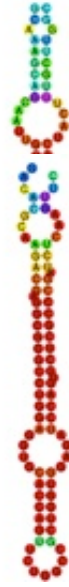

qseq\_525  
MFE-oss -37.4  
MFE-css -37.4

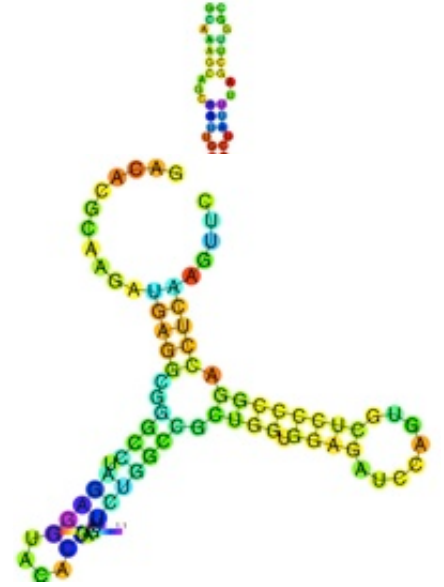

sseq\_525  
MFE-oss -28.3  
MFE-css -28.3

SeqID  
525

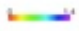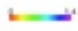

SeqID  
526

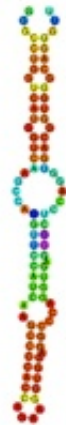

fseq\_526  
MFE-oss -41.7  
MFE-css -41.1

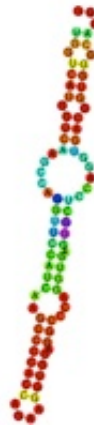

qseq\_526  
MFE-oss -35.1  
MFE-css -34.5

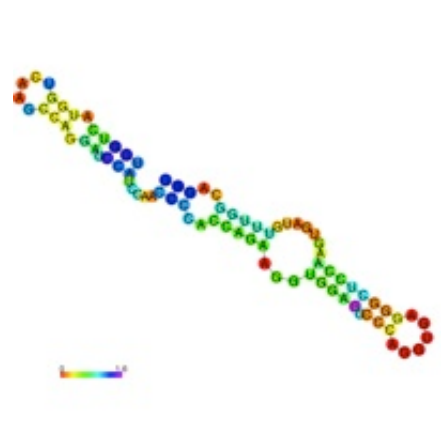

sseq\_526  
MFE-oss -29.1  
MFE-css -28.6

SeqID  
527

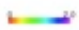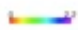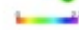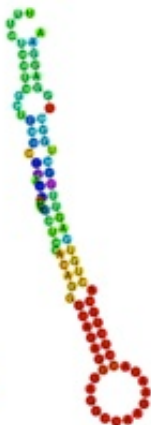

fseq\_527  
MFE-oss -38.02  
MFE-css -36.72

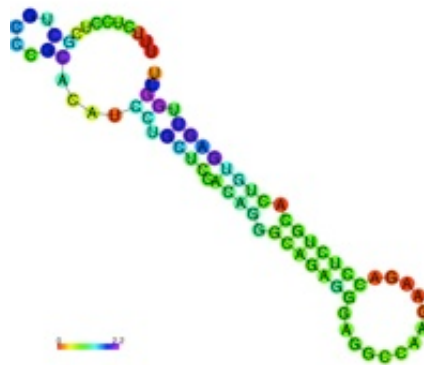

qseq\_527  
MFE-oss -26.22  
MFE-css -17.52

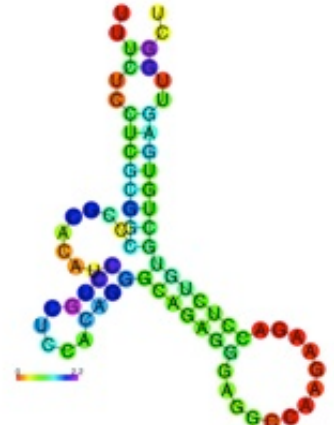

sseq\_527  
MFE-oss -28.22  
MFE-css -20.11

SeqID  
528

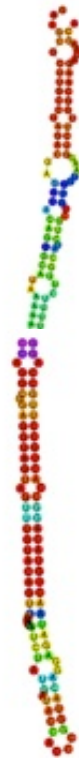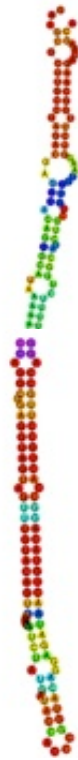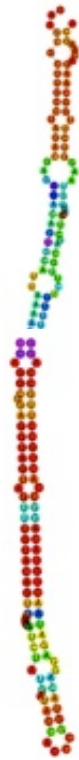

SeqID  
530

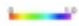

fseq\_530  
MFE-oss -40.8  
MFE-css -40.8

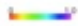

qseq\_530  
MFE-oss -40.8  
MFE-css -40.8

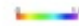

sseq\_530  
MFE-oss -40.8  
MFE-css -40.8

SeqID  
532

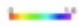

fseq\_532  
MFE-oss -36.7  
MFE-css -31.2

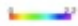

qseq\_532  
MFE-oss -33.8  
MFE-css -33.6

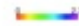

sseq\_532  
MFE-oss -30.84  
MFE-css -28.61

SeqID  
533

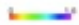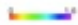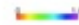

fseq\_533  
MFE-oss -39.2  
MFE-css -39.2

qseq\_533  
MFE-oss -39.2  
MFE-css -39.2

sseq\_533  
MFE-oss -39.2  
MFE-css -39.2

SeqID  
534

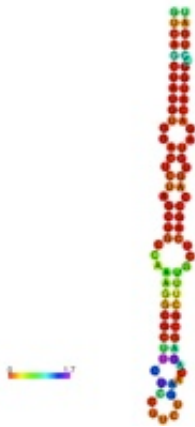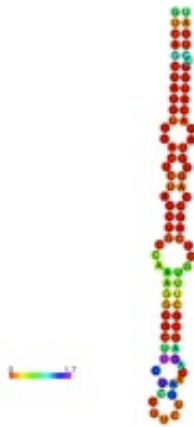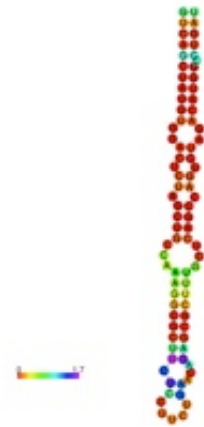

fseq\_534  
MFE-oss -33.7  
MFE-css -33.62

qseq\_534  
MFE-oss -33.7  
MFE-css -33.62

sseq\_534  
MFE-oss -33.7  
MFE-css -33.62

SeqID  
535

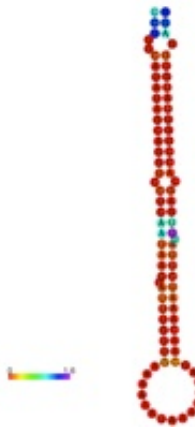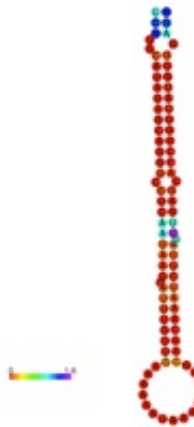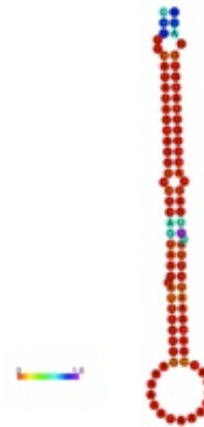

fseq\_535  
MFE-oss -33.26  
MFE-css -33.26

qseq\_535  
MFE-oss -33.26  
MFE-css -33.26

sseq\_535  
MFE-oss -33.46  
MFE-css -33.46

SeqID  
536

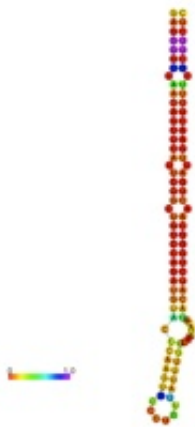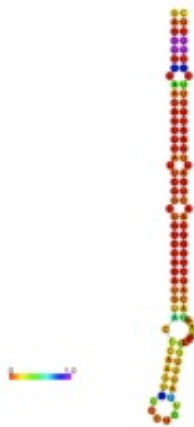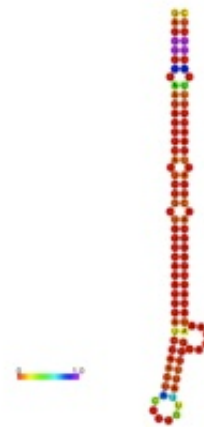

fseq\_536  
MFE-oss -46.6  
MFE-css -42.5

qseq\_536  
MFE-oss -46.6  
MFE-css -42.5

sseq\_536  
MFE-oss -48.8  
MFE-css -45.7

SeqID  
537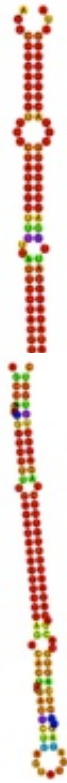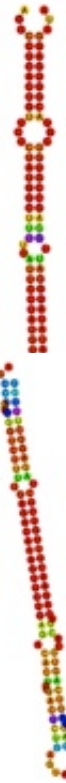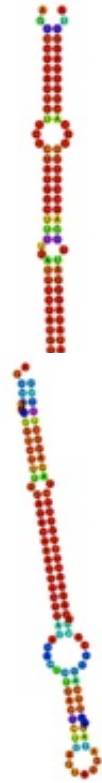SeqID  
538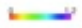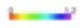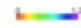

fseq\_538  
MFE-oss -41.1  
MFE-css -36.4

qseq\_538  
MFE-oss -38.9  
MFE-css -34.2

sseq\_538  
MFE-oss -39.9  
MFE-css -35.2

SeqID  
539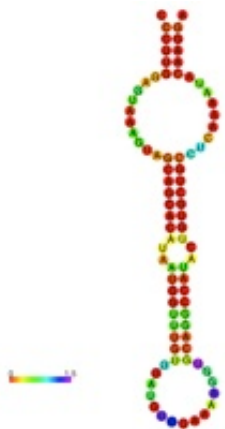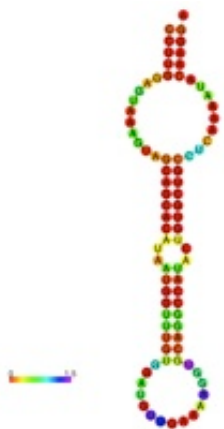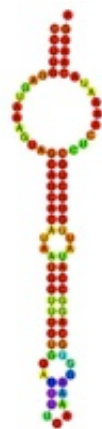

fseq\_539  
MFE-oss -29.97  
MFE-css -29.97

qseq\_539  
MFE-oss -29.67  
MFE-css -29.67

sseq\_539  
MFE-oss -30.81  
MFE-css -29.53

SeqID  
540

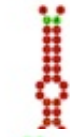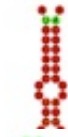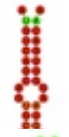

SeqID  
541

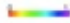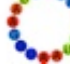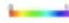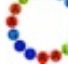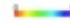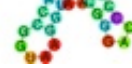

fseq\_541  
MFE-oss -29.04  
MFE-css -29.04

qseq\_541  
MFE-oss -29.04  
MFE-css -29.04

sseq\_541  
MFE-oss -29.7  
MFE-css -29.4

SeqID  
542

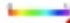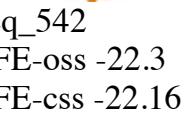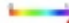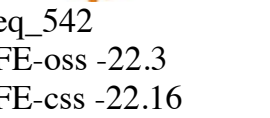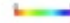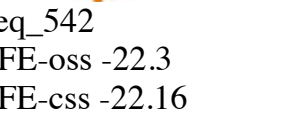

fseq\_542  
MFE-oss -22.3  
MFE-css -22.16

qseq\_542  
MFE-oss -22.3  
MFE-css -22.16

sseq\_542  
MFE-oss -22.3  
MFE-css -22.16

SeqID  
543

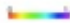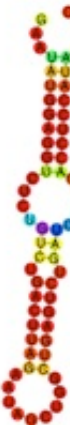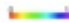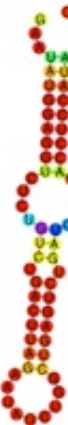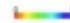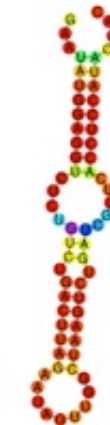

fseq\_543  
MFE-oss -23.2  
MFE-css -23.2

qseq\_543  
MFE-oss -23.2  
MFE-css -23.2

sseq\_543  
MFE-oss -23.1  
MFE-css -23.1

SeqID  
544

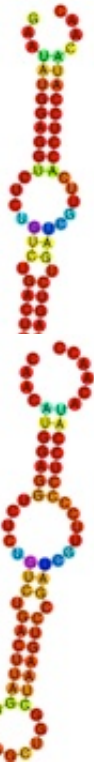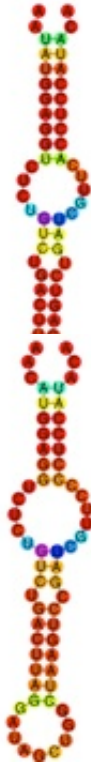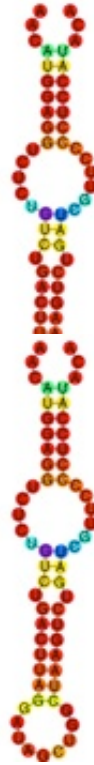

SeqID  
545

fseq\_545  
MFE-oss -20.4  
MFE-css -20.4

qseq\_545  
MFE-oss -20.4  
MFE-css -20.4

sseq\_545  
MFE-oss -20.4  
MFE-css -20.4

SeqID  
547

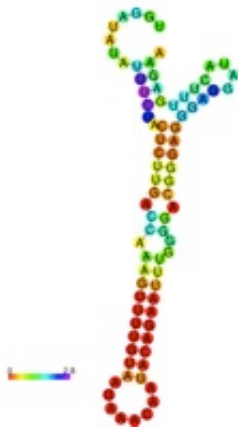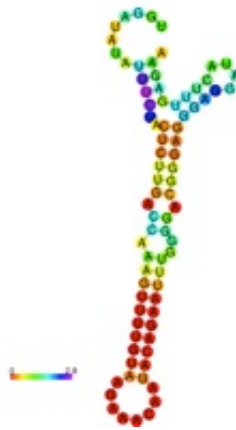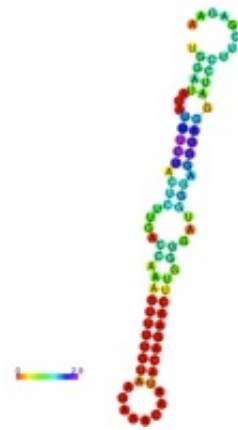

fseq\_547  
MFE-oss -20.4  
MFE-css -13.8

qseq\_547  
MFE-oss -20.4  
MFE-css -13.8

sseq\_547  
MFE-oss -23.7  
MFE-css -11.75

SeqID  
548

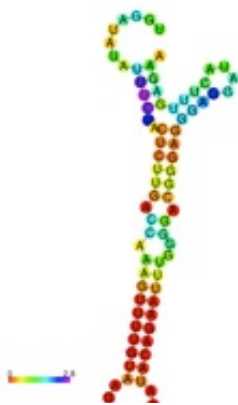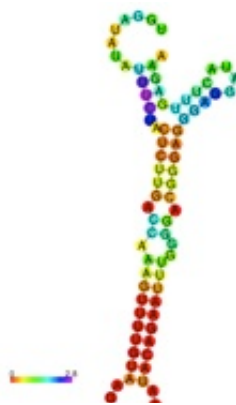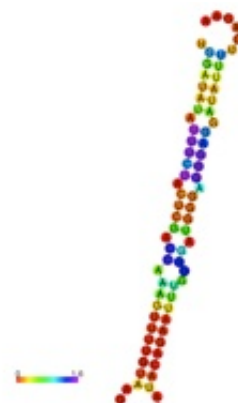



fseq\_548  
MFE-oss -20.4  
MFE-css -13.8

qseq\_548  
MFE-oss -20.4  
MFE-css -13.8

sseq\_548  
MFE-oss -19.8  
MFE-css -18.9

SeqID  
**549**

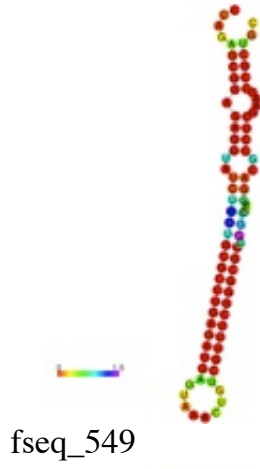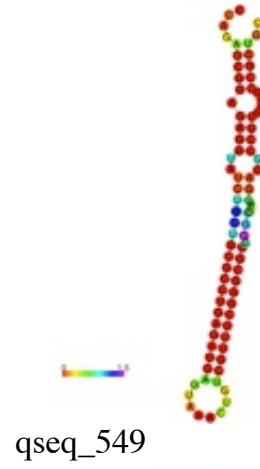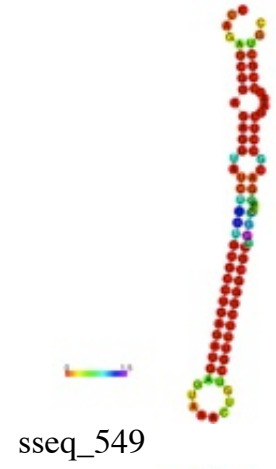

SeqID  
**550**

fseq\_550  
MFE-oss -35.1  
MFE-css -30.9

qseq\_550  
MFE-oss -35.1  
MFE-css -30.9

sseq\_550  
MFE-oss -34.3  
MFE-css -34.3

SeqID  
**551**

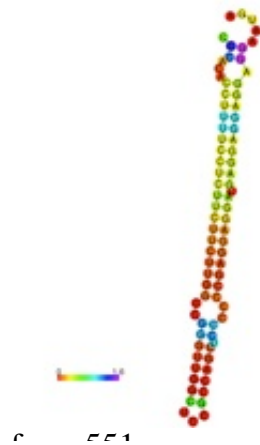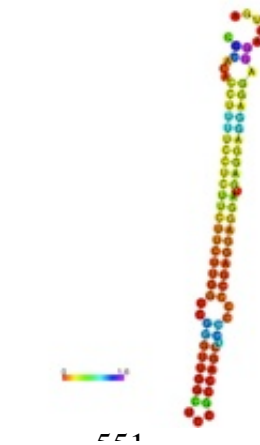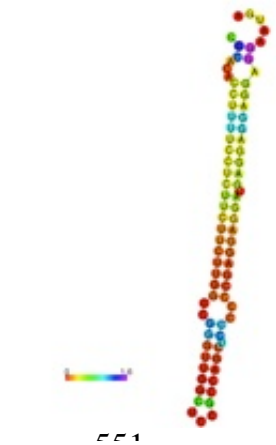

iseq\_551  
MFE-oss -41.8  
MFE-css -41.8

qseq\_551  
MFE-oss -41.8  
MFE-css -41.8

sseq\_551  
MFE-oss -41.8  
MFE-css -41.8

SeqID  
552

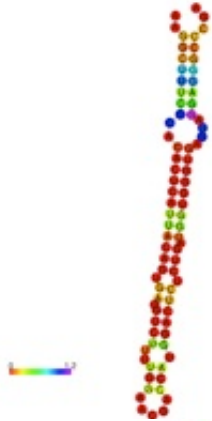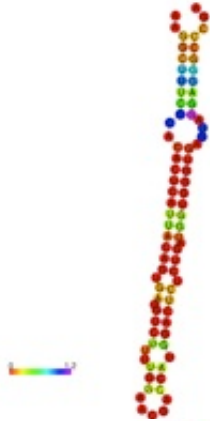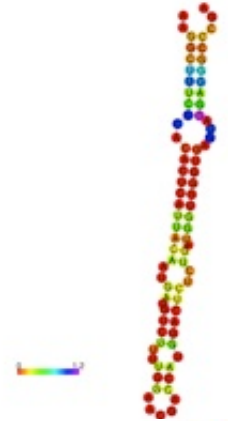

SeqID  
553

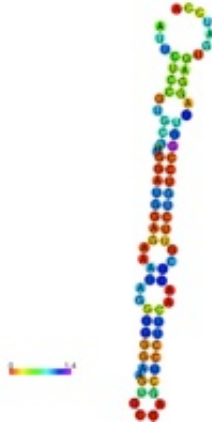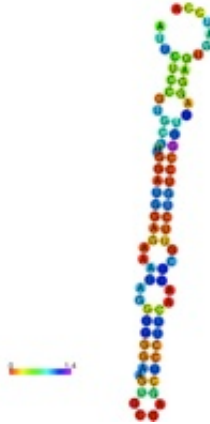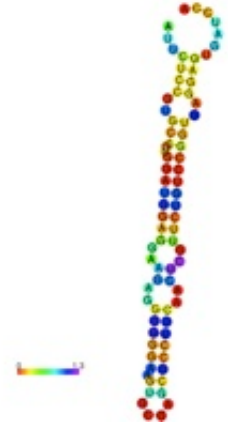

fseq\_553  
MFE-oss -27.2  
MFE-css -19.4

qseq\_553  
MFE-oss -27.2  
MFE-css -19.4

sseq\_553  
MFE-oss -28.4  
MFE-css -20.6

SeqID  
554

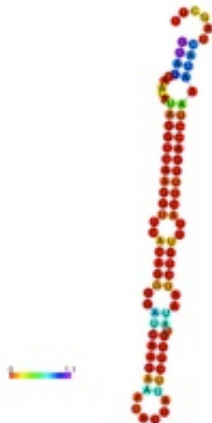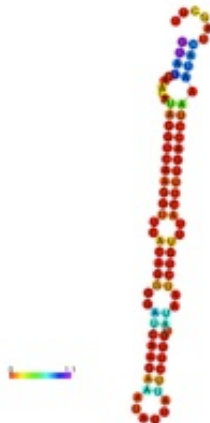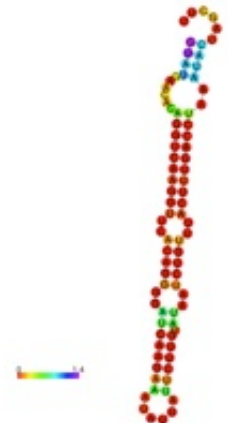

fseq\_554  
MFE-oss -29.2  
MFE-css -29.2

qseq\_554  
MFE-oss -29.2  
MFE-css -29.2

sseq\_554  
MFE-oss -27.6  
MFE-css -27.6

SeqID

555

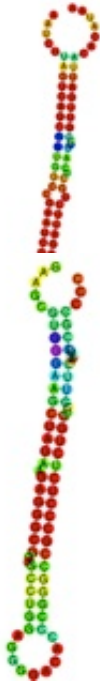

fseq\_556  
MFE-oss -35.9  
MFE-css -26.7

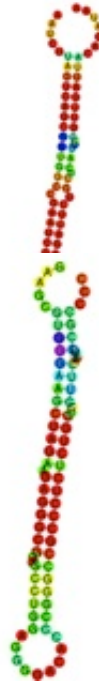

qseq\_556  
MFE-oss -35.9  
MFE-css -26.7

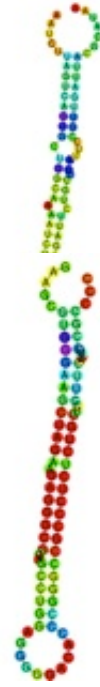

sseq\_556  
MFE-oss -35.8  
MFE-css -24.94

SeqID

556

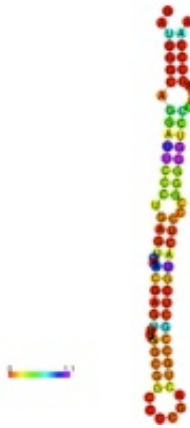

fseq\_557  
MFE-oss -39.6  
MFE-css -39.6

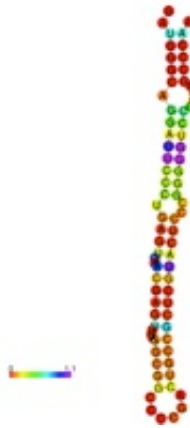

qseq\_557  
MFE-oss -39.6  
MFE-css -39.6

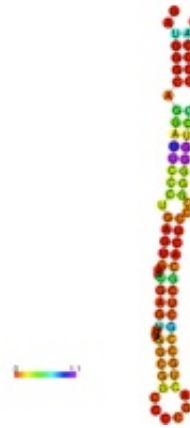

sseq\_557  
MFE-oss -40.5  
MFE-css -40.5

SeqID

557

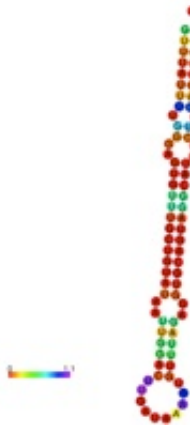

fseq\_558  
MFE-oss -39.5  
MFE-css -27.7

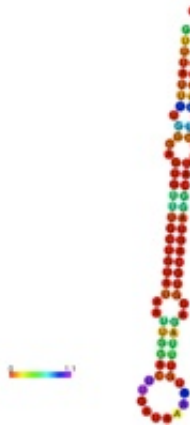

qseq\_558  
MFE-oss -39.5  
MFE-css -27.7

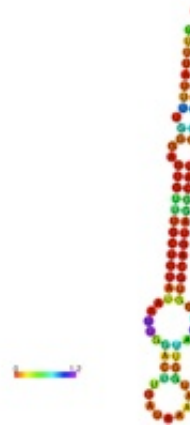

sseq\_558  
MFE-oss -39.5  
MFE-css -27.7

SeqID

558

MFE-oss -28.5  
MFE-css -28.5

MFE-oss -28.5  
MFE-css -28.5

MFE-oss -27  
MFE-css -27

SeqID  
**559**

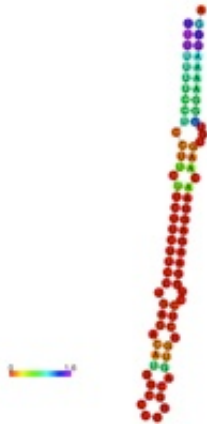

fseq\_559  
MFE-oss -33.3  
MFE-css -21.0

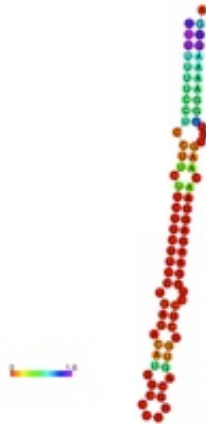

qseq\_559  
MFE-oss -33.3  
MFE-css -21.0

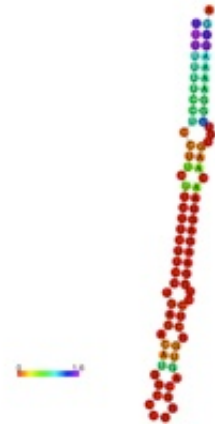

sseq\_559  
MFE-oss -33.3  
MFE-css -21.0

SeqID  
**560**

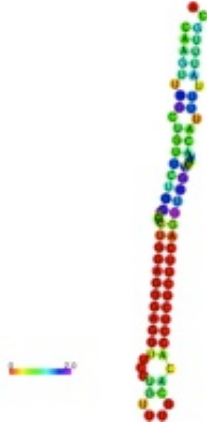

fseq\_560  
MFE-oss -23.9  
MFE-css -21.3

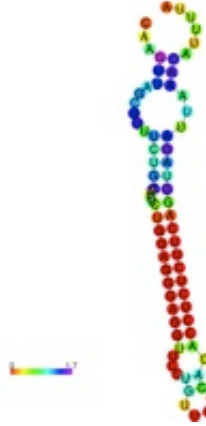

qseq\_560  
MFE-oss -22.1  
MFE-css -22

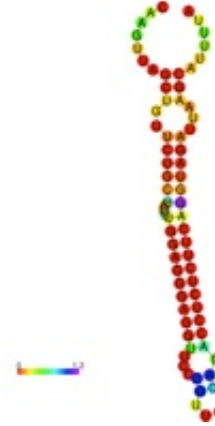

sseq\_560  
MFE-oss -26.2  
MFE-css -26.2

SeqID  
**561**

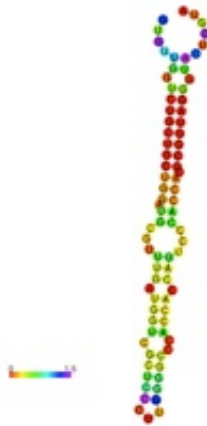

fseq\_561  
MFE-oss -28.3  
MFE-css -28.5

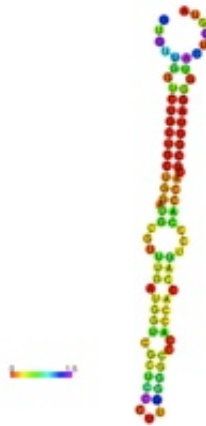

qseq\_561  
MFE-oss -28.3  
MFE-css -28.5

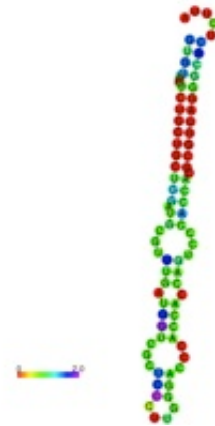

sseq\_561  
MFE-oss -28.8  
MFE-css -27.6

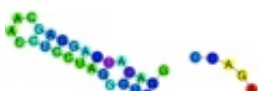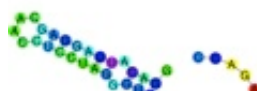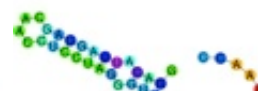

SeqID  
562

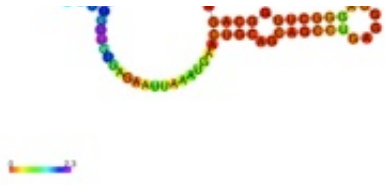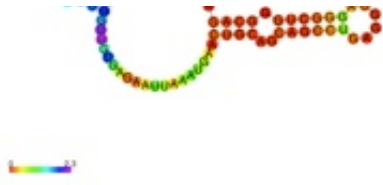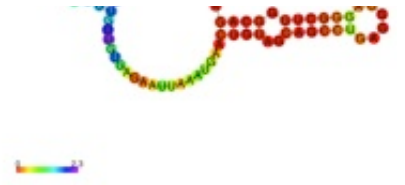

fseq\_562  
MFE-oss -26.7  
MFE-css -24.1

qseq\_562  
MFE-oss -26.7  
MFE-css -24.1

sseq\_562  
MFE-oss -25  
MFE-css -22.4

SeqID  
563

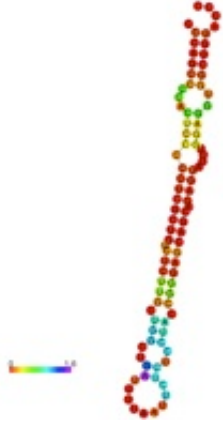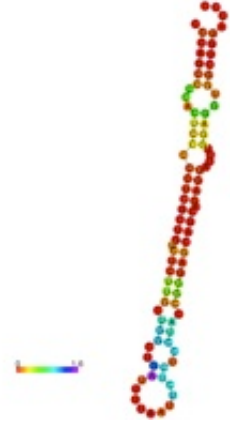

fseq\_563  
MFE-oss -39  
MFE-css -38.2

qseq\_563  
MFE-oss -39  
MFE-css -38.2

sseq\_563  
MFE-oss -39  
MFE-css -38.2

SeqID  
567

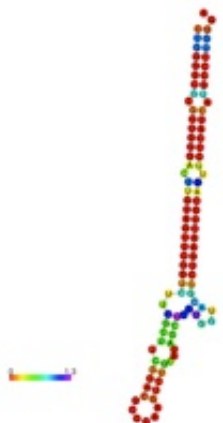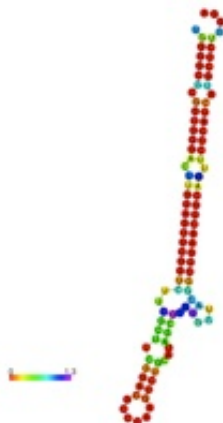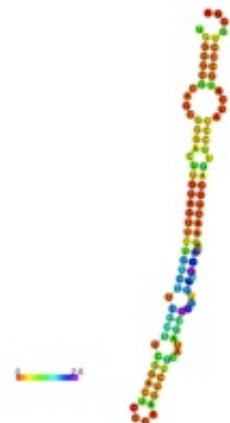

fseq\_567  
MFE-oss -54.6  
MFE-css -55.2

qseq\_567  
MFE-oss -51.9  
MFE-css -52.2

sseq\_567  
MFE-oss -40  
MFE-css -34.05

SeqID  
568

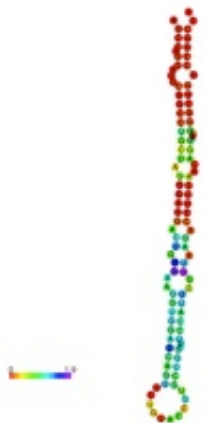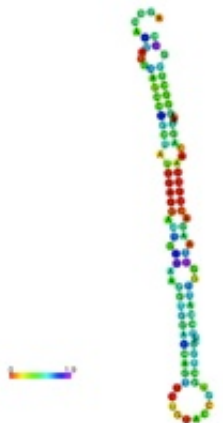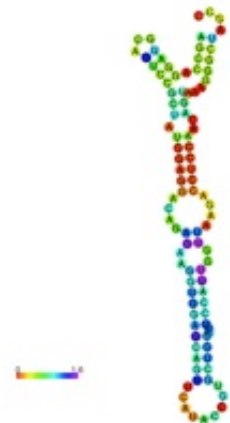

fseq\_568  
MFE-oss -41.4  
MFE-css -41.3

qseq\_568  
MFE-oss -35.3  
MFE-css -34.8

sseq\_568  
MFE-oss -32.6  
MFE-css -32.4

SeqID

**570**

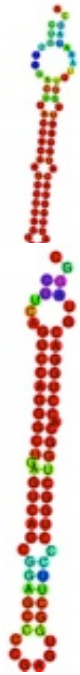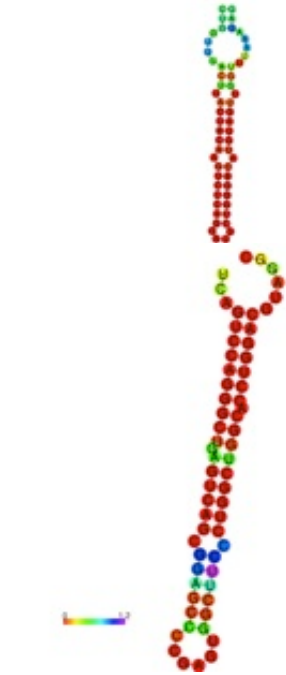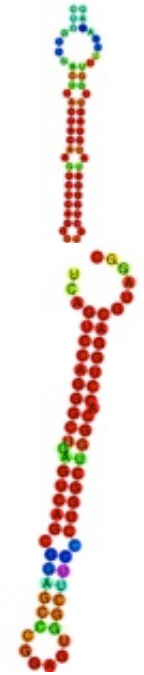

SeqID  
**571**

fseq\_571  
MFE-oss -36.6  
MFE-css -36.3

qseq\_571  
MFE-oss -36.3  
MFE-css -36.3

sseq\_571  
MFE-oss -36.3  
MFE-css -36.3

SeqID  
**577**

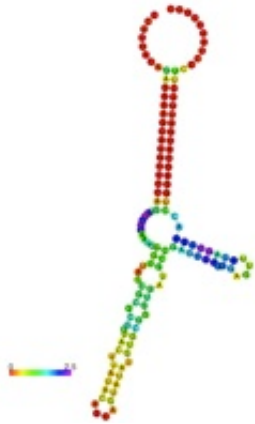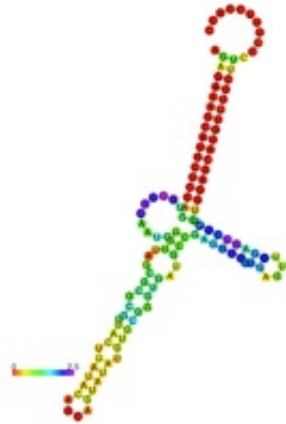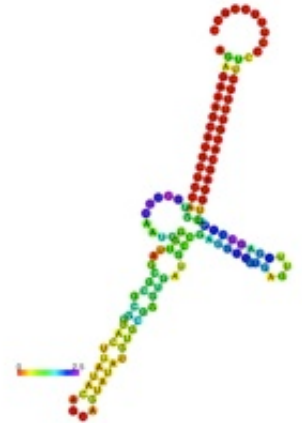

fseq\_577  
MFE-oss -53.1  
MFE-css -45.05

qseq\_577  
MFE-oss -53.1  
MFE-css -45.05

sseq\_577  
MFE-oss -53.1  
MFE-css -45.05

SeqID  
**578**

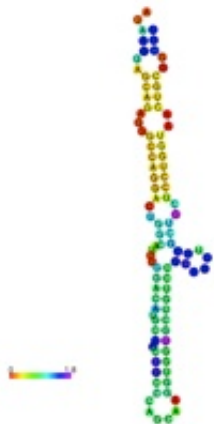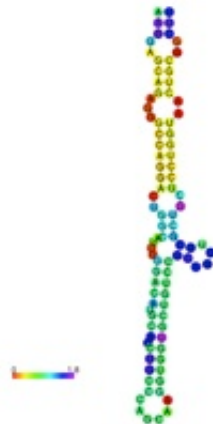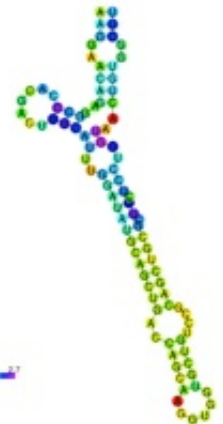

fseq\_578  
MFE-oss -44

qseq\_578  
MFE-oss -42.6

sseq\_578  
MFE-oss -21.4

MFE-oss -44  
MFE-css -33.3

MFE-oss -43.0  
MFE-css -32.7

MFE-oss -51.4  
MFE-css -21.71

SeqID  
**579**

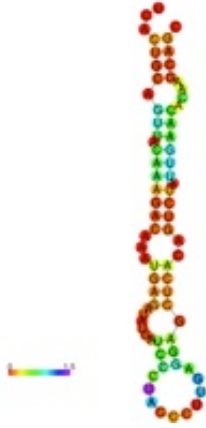

fseq\_579  
MFE-oss -14.3  
MFE-css -14.3

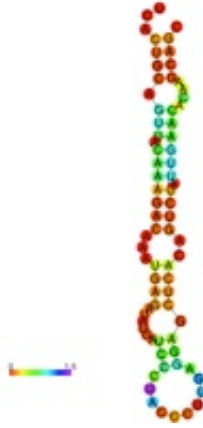

qseq\_579  
MFE-oss -14.3  
MFE-css -14.3

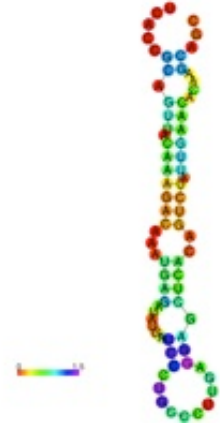

sseq\_579  
MFE-oss -11.2  
MFE-css -11.2

SeqID  
**580**

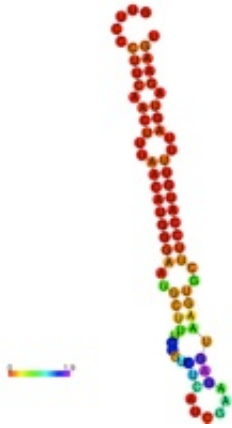

fseq\_580  
MFE-oss -24.6  
MFE-css -20.97

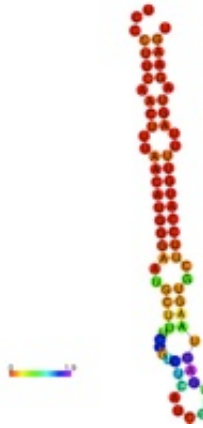

qseq\_580  
MFE-oss -24.6  
MFE-css -20.97

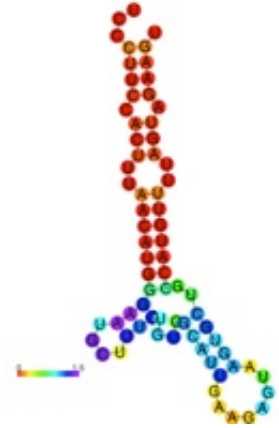

sseq\_580  
MFE-oss -21.8  
MFE-css -21.8

SeqID  
**581**

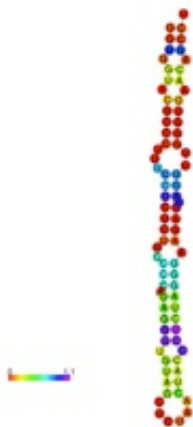

fseq\_581  
MFE-oss -38.5  
MFE-css -38.5

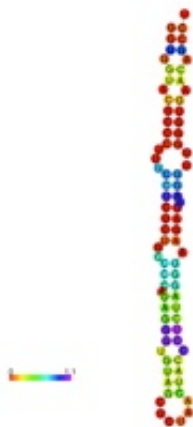

qseq\_581  
MFE-oss -38.5  
MFE-css -38.5

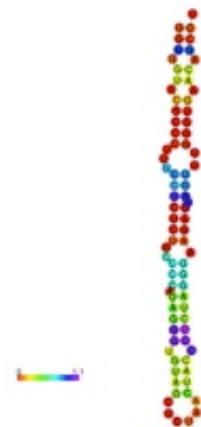

sseq\_581  
MFE-oss -38.5  
MFE-css -38.5

SeqID  
582

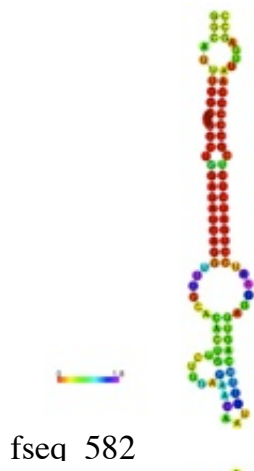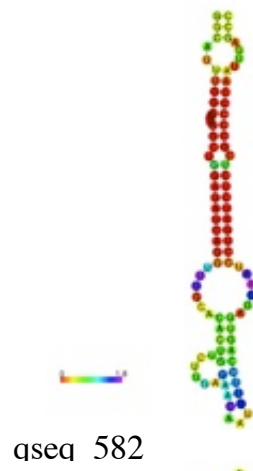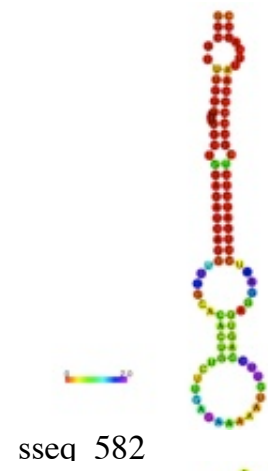

SeqID  
583

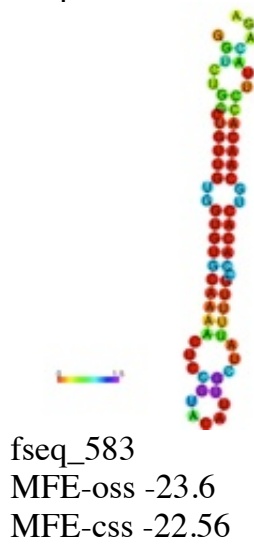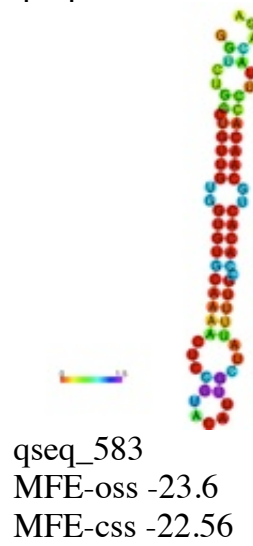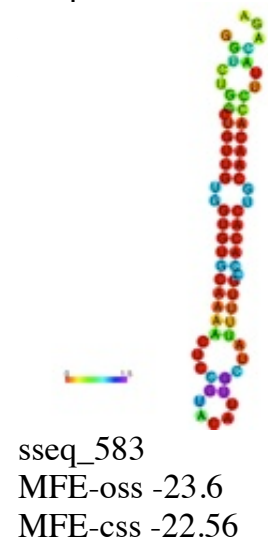

SeqID  
585

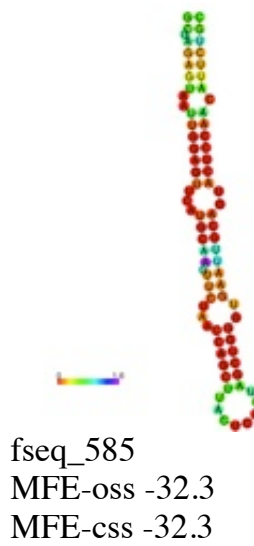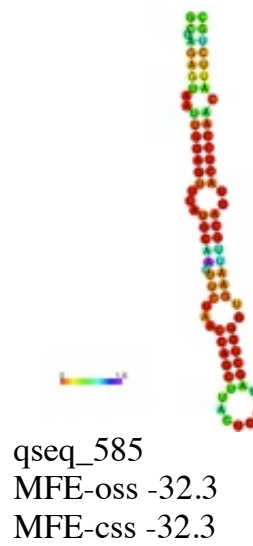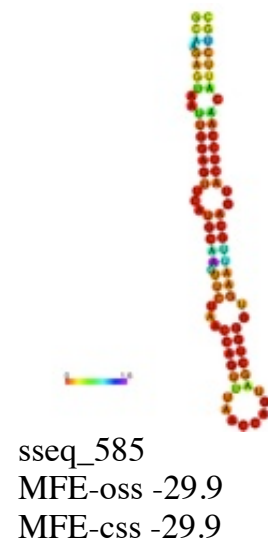

SeqID

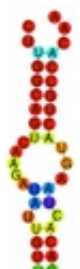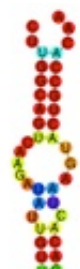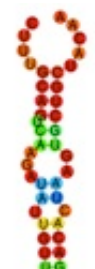



586

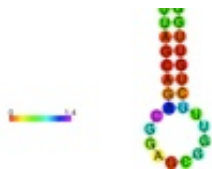

fseq\_586  
MFE-oss -20.8  
MFE-css -19.3

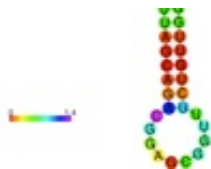

qseq\_586  
MFE-oss -20.8  
MFE-css -19.3

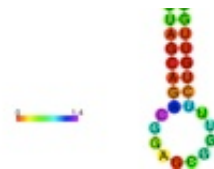

sseq\_586  
MFE-oss -18  
MFE-css -18

SeqID  
587

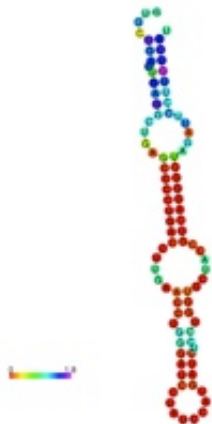

fseq\_587  
MFE-oss -32.6  
MFE-css -30.3

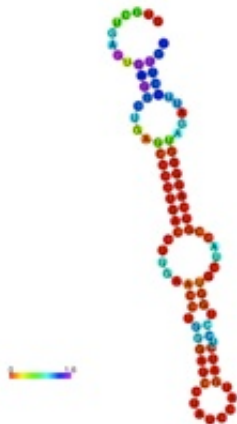

qseq\_587  
MFE-oss -31  
MFE-css -29.3

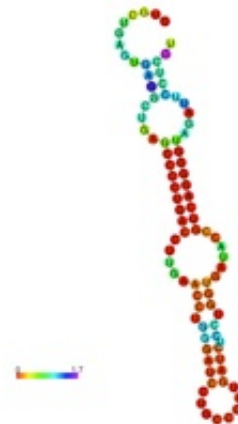

sseq\_587  
MFE-oss -33.4  
MFE-css -32.8

SeqID  
589

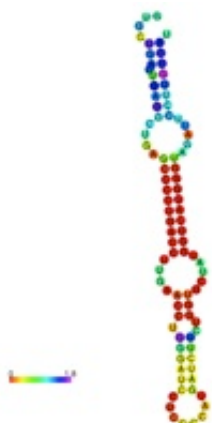

fseq\_589  
MFE-oss -34.9  
MFE-css -32.6

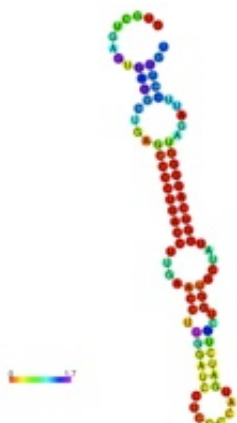

qseq\_589  
MFE-oss -33.3  
MFE-css -31.6

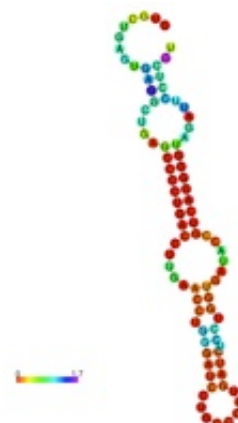

sseq\_589  
MFE-oss -33.4  
MFE-css -32.8

SeqID  
590

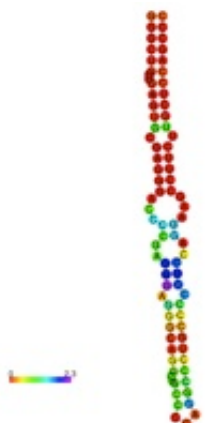

fseq\_590  
MFE-oss -46.6  
MFE-css -42.2

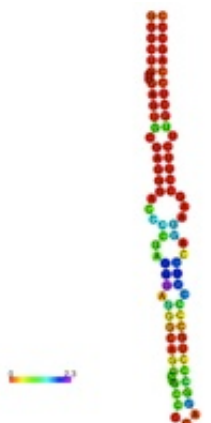

qseq\_590  
MFE-oss -46.6  
MFE-css -42.2

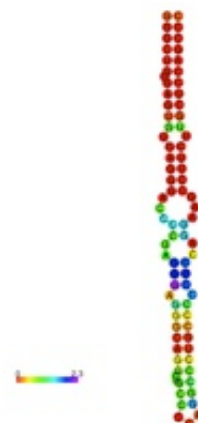

sseq\_590  
MFE-oss -48.9  
MFE-css -44.5

SeqID  
591

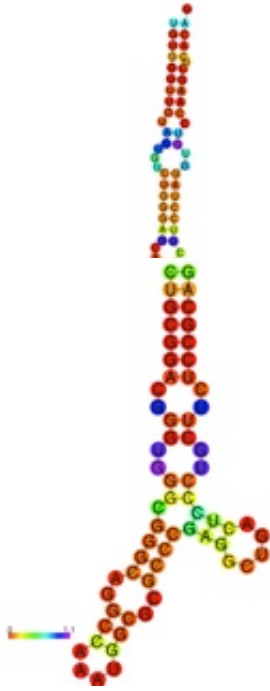

fseq\_592  
MFE-oss -36.8  
MFE-css -36.8

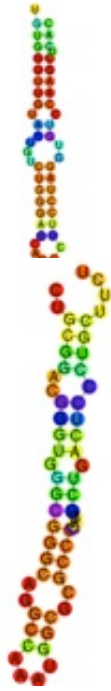

qseq\_592  
MFE-oss -25.9  
MFE-css -25.9

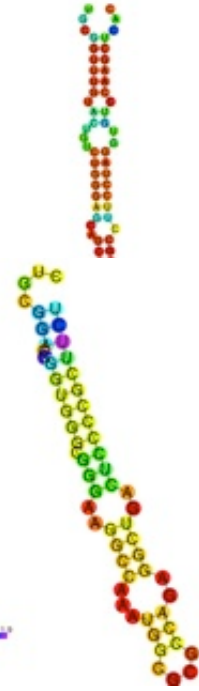

sseq\_592  
MFE-oss -24.2  
MFE-css -23.7

SeqID  
592

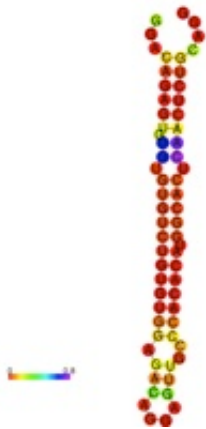

fseq\_594  
MFE-oss -29.9  
MFE-css -29.9

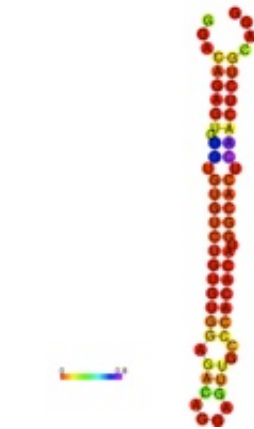

qseq\_594  
MFE-oss -29.9  
MFE-css -29.9

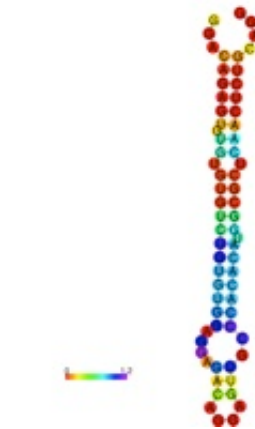

sseq\_594  
MFE-oss -28.3  
MFE-css -28.3

SeqID  
594

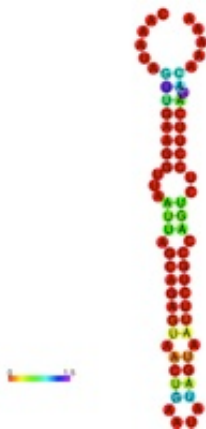

fseq\_595

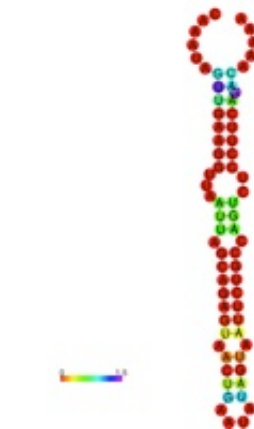

qseq\_595

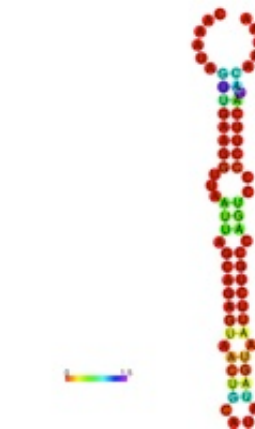

sseq\_595

SeqID  
595

MFE-oss -20.4  
MFE-css -16.3

MFE-oss -20.4  
MFE-css -16.3

MFE-oss -20  
MFE-css -15.9

SeqID  
596

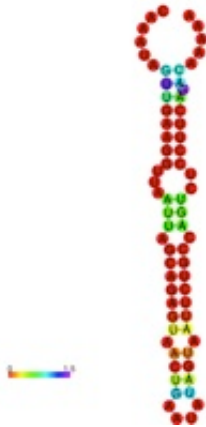

fseq\_596  
MFE-oss -20.4  
MFE-css -16.3

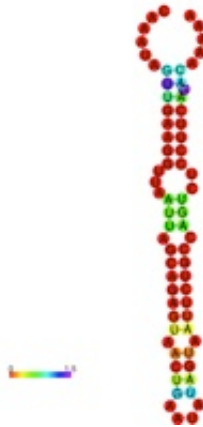

qseq\_596  
MFE-oss -20.4  
MFE-css -16.3

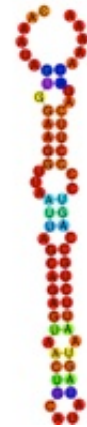

sseq\_596  
MFE-oss -19.2  
MFE-css -19.2

SeqID  
597

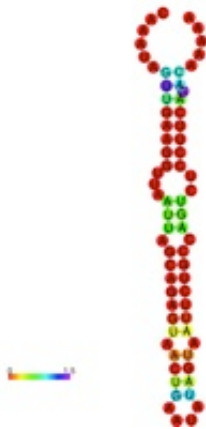

fseq\_597  
MFE-oss -20.4  
MFE-css -16.3

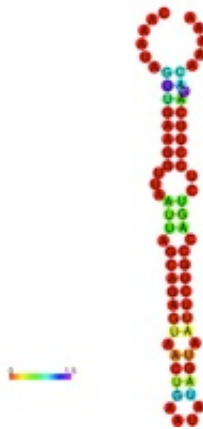

qseq\_597  
MFE-oss -20.4  
MFE-css -16.3

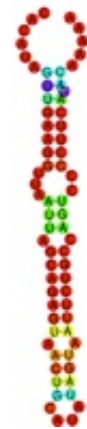

sseq\_597  
MFE-oss -20  
MFE-css -15.9

SeqID  
598

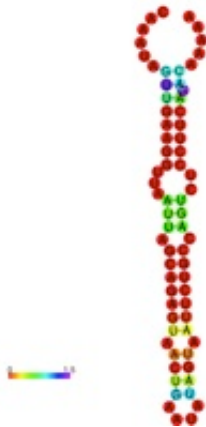

fseq\_598  
MFE-oss -20.4

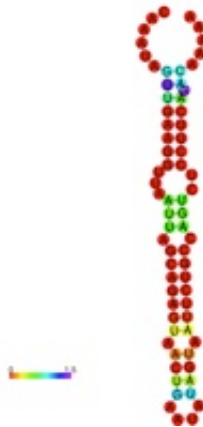

qseq\_598  
MFE-oss -20.4

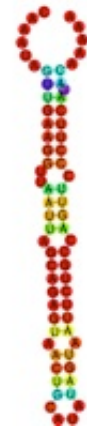

sseq\_598  
MFE-oss -20.9

MFE-css -16.3

MFE-css -16.3

MFE-css -16.8

SeqID  
600

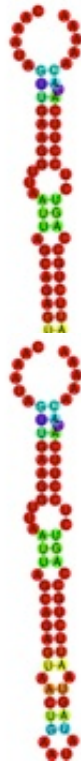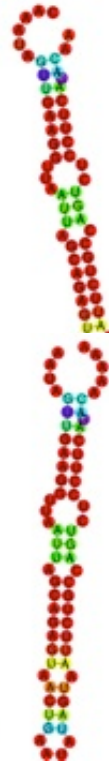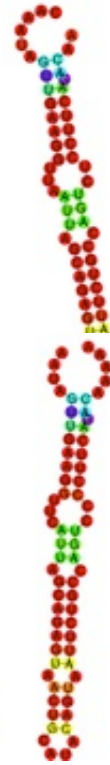

SeqID  
601

fseq\_601  
MFE-oss -20.4  
MFE-css -16.3

qseq\_601  
MFE-oss -20.4  
MFE-css -16.3

sseq\_601  
MFE-oss -22.1  
MFE-css -18

SeqID  
602

fseq\_602  
MFE-oss -33.1  
MFE-css -32.41

qseq\_602  
MFE-oss -32.7  
MFE-css -32.41

sseq\_602  
MFE-oss -27  
MFE-css -27

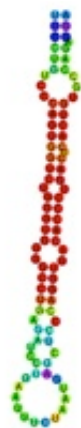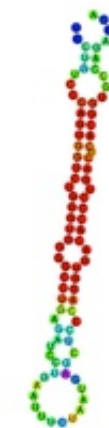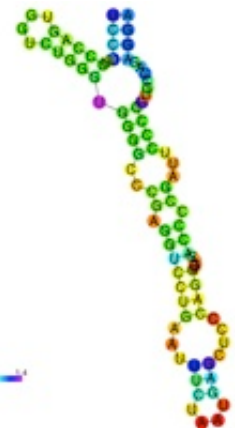



fseq\_607  
MFE-oss -27.4  
MFE-css -24.52

qseq\_607  
MFE-oss -27.4  
MFE-css -24.52

sseq\_607  
MFE-oss -26.3  
MFE-css -26.3

SeqID  
**608**

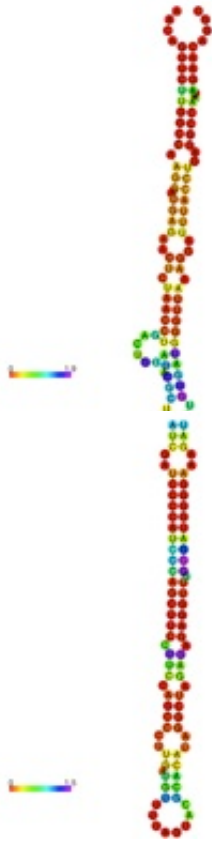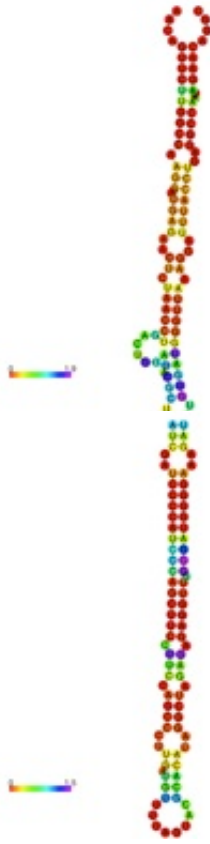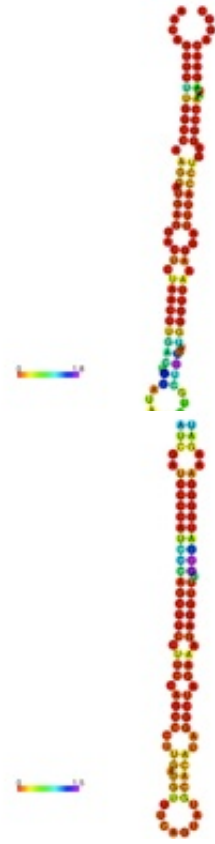

SeqID  
**609**

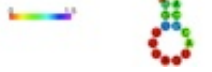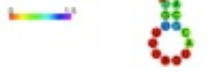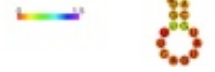

fseq\_609  
MFE-oss -41.4  
MFE-css -41.4

qseq\_609  
MFE-oss -41.4  
MFE-css -41.4

sseq\_609  
MFE-oss -42.4  
MFE-css -42.4

SeqID  
**610**

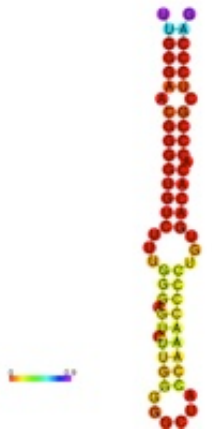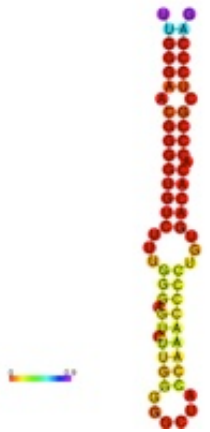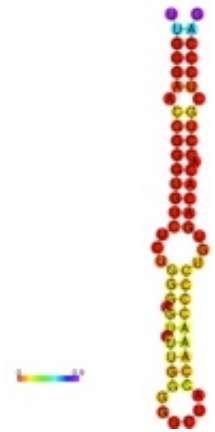

fseq\_610  
MFE-oss -36  
MFE-css -36

qseq\_610  
MFE-oss -36  
MFE-css -36

sseq\_610  
MFE-oss -33.8  
MFE-css -33.8

SeqID  
**611**

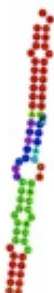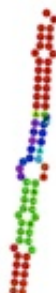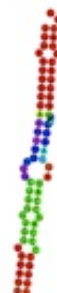

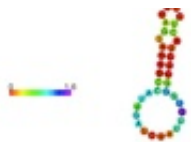

fseq\_611  
MFE-oss -57.84  
MFE-css -48.11

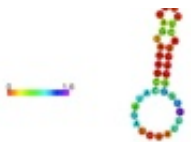

qseq\_611  
MFE-oss -57.84  
MFE-css -48.11

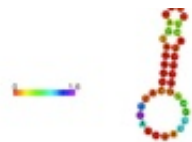

sseq\_611  
MFE-oss -57.84  
MFE-css -48.11

SeqID  
**613**

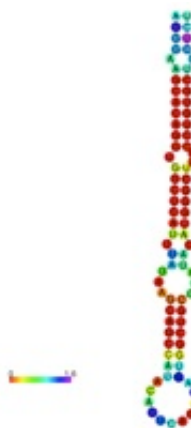

fseq\_613  
MFE-oss -41.4  
MFE-css -38.62

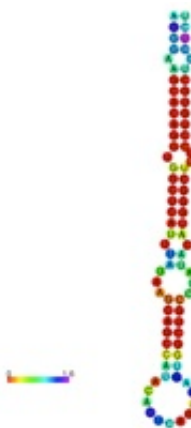

qseq\_613  
MFE-oss -41.4  
MFE-css -38.62

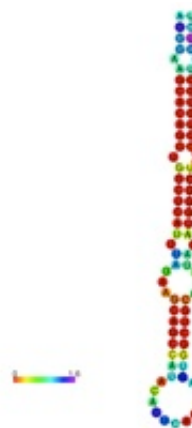

sseq\_613  
MFE-oss -41.4  
MFE-css -38.62

SeqID  
**621**

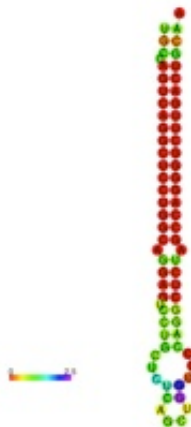

fseq\_621  
MFE-oss -44.4  
MFE-css -43.24

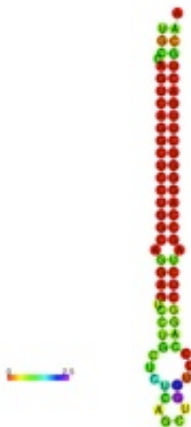

qseq\_621  
MFE-oss -44.4  
MFE-css -43.24

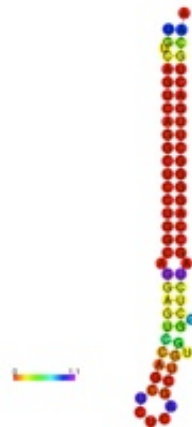

sseq\_621  
MFE-oss -46.9  
MFE-css -46.9

SeqID  
**629**

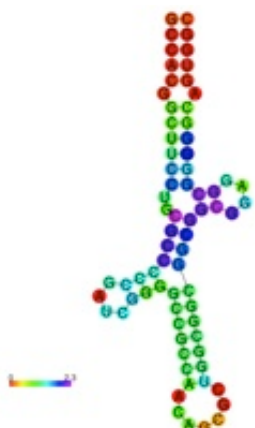

fseq\_629  
MFE-oss -45.3  
MFE-css -37.1

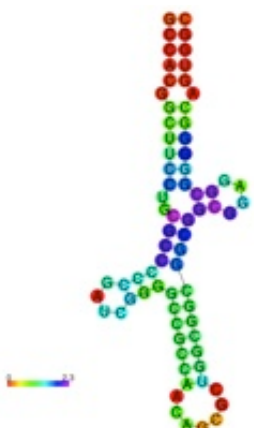

qseq\_629  
MFE-oss -45.3  
MFE-css -37.1

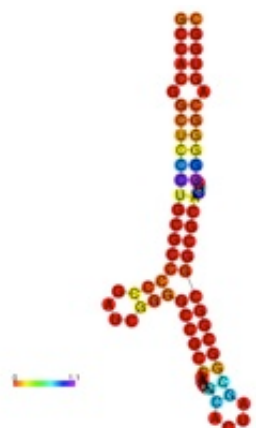

sseq\_629  
MFE-oss -49.4  
MFE-css -49.4

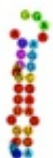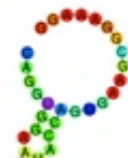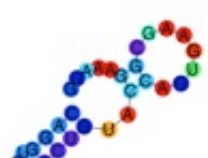

SeqID  
631

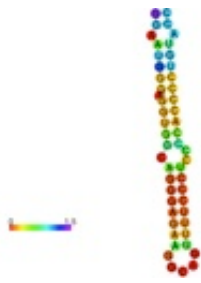

fseq\_631  
MFE-oss -33.8  
MFE-css -33.7

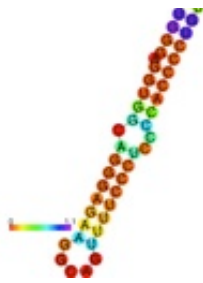

qseq\_631  
MFE-oss -26.9  
MFE-css -26.9

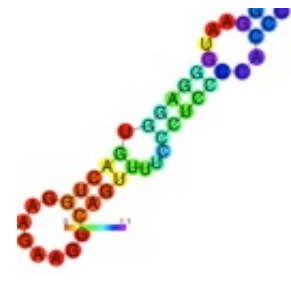

sseq\_631  
MFE-oss -24.6  
MFE-css -24.6

SeqID  
632

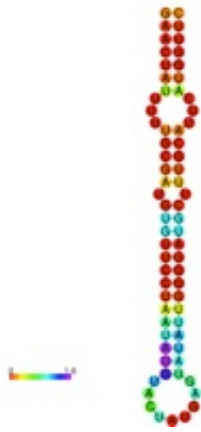

fseq\_632  
MFE-oss -26.3  
MFE-css -26.1

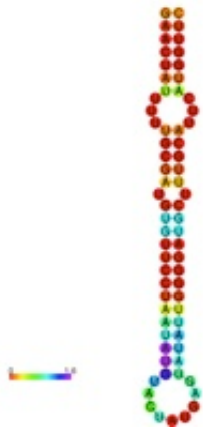

qseq\_632  
MFE-oss -26.3  
MFE-css -26.1

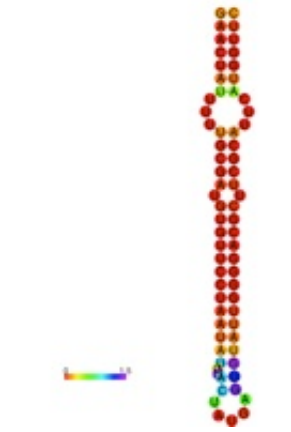

sseq\_632  
MFE-oss -30.7  
MFE-css -28.62

SeqID  
634

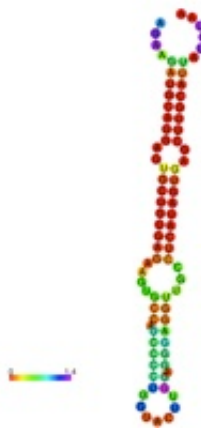

fseq\_634  
MFE-oss -33.8  
MFE-css -33.2

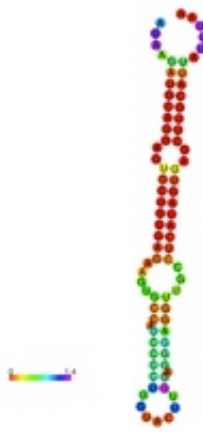

qseq\_634  
MFE-oss -33.8  
MFE-css -33.2

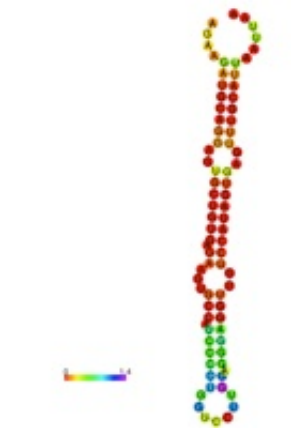

sseq\_634  
MFE-oss -29.6  
MFE-css -28.1

SeqID

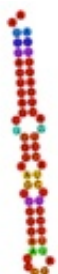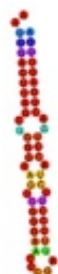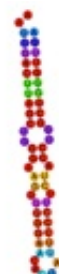



636

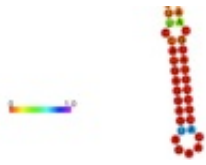

fseq\_636  
MFE-oss -39.5  
MFE-css -40.1

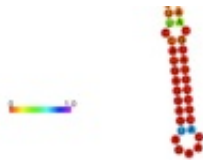

qseq\_636  
MFE-oss -39.5  
MFE-css -40.1

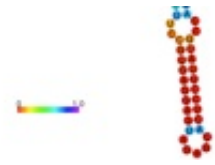

sseq\_636  
MFE-oss -42  
MFE-css -42.6

SeqID  
638

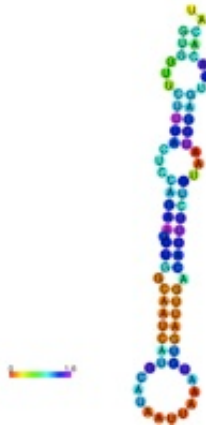

fseq\_638  
MFE-oss -19.4  
MFE-css -17.4

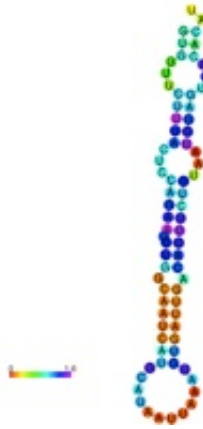

qseq\_638  
MFE-oss -19.4  
MFE-css -17.4

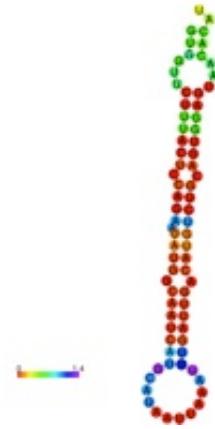

sseq\_638  
MFE-oss -25.9  
MFE-css -25.5

SeqID  
641

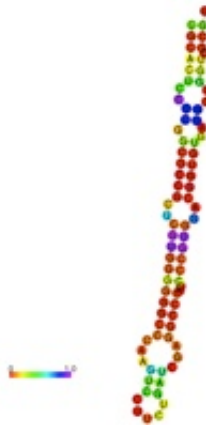

fseq\_641  
MFE-oss -38.3  
MFE-css -38.3

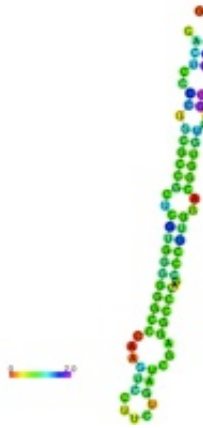

qseq\_641  
MFE-oss -32.8  
MFE-css -31.4

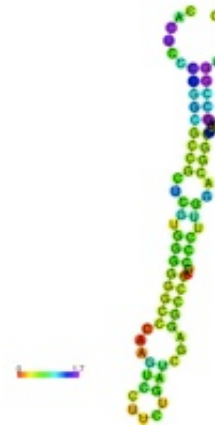

sseq\_641  
MFE-oss -32.2  
MFE-css -32.2

SeqID  
642

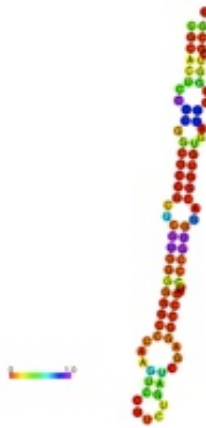

fseq\_642  
MFE-oss -38.3  
MFE-css -38.3

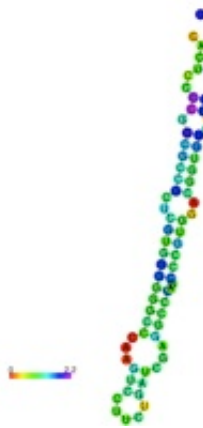

qseq\_642  
MFE-oss -32.8  
MFE-css -23.3

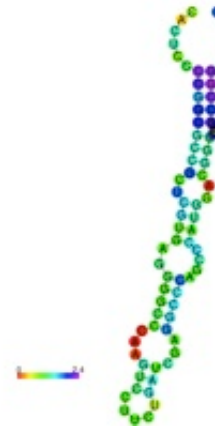

sseq\_642  
MFE-oss -31.1  
MFE-css -8.83

SeqID  
643

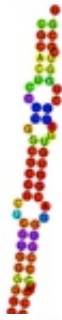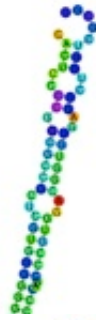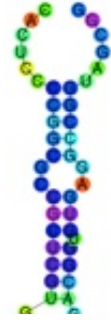

SeqID  
644

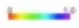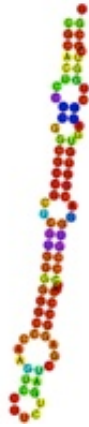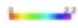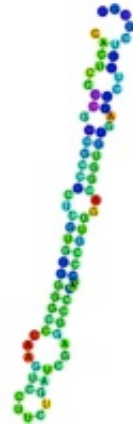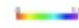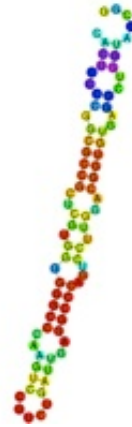

fseq\_644  
MFE-oss -38.3  
MFE-css -38.3

qseq\_644  
MFE-oss -32.8  
MFE-css -23.3

sseq\_644  
MFE-oss -32.5  
MFE-css -30

SeqID  
645

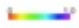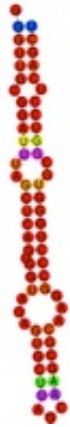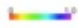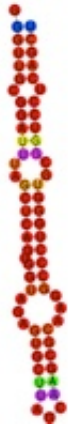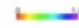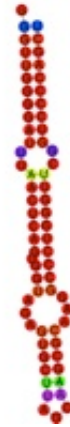

fseq\_645  
MFE-oss -30.2  
MFE-css -30.2

qseq\_645  
MFE-oss -30.2  
MFE-css -30.2

sseq\_645  
MFE-oss -38.9  
MFE-css -38.9

SeqID  
654

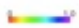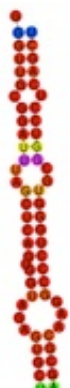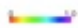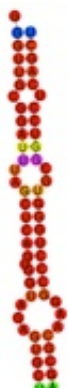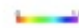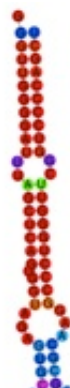

fseq\_654  
MFE-oss -30.2  
MFE-css -30.2

qseq\_654  
MFE-oss -30.2  
MFE-css -30.2

sseq\_654  
MFE-oss -37.2  
MFE-css -37.2

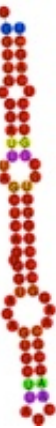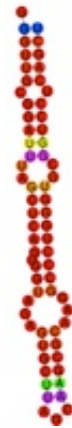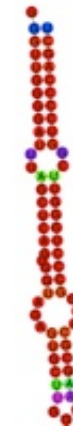

SeqID  
**667**

fseq\_667  
MFE-oss -30.2

qseq\_667  
MFE-oss -30.2

sseq\_667  
MFE-oss -38.9

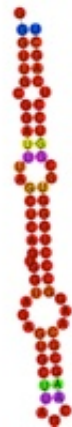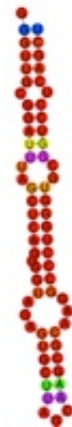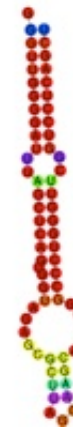

SeqID  
**674**

fseq\_674  
MFE-oss -30.2  
MFE-css -30.2

qseq\_674  
MFE-oss -30.2  
MFE-css -30.2

sseq\_674  
MFE-oss -31.5  
MFE-css -31.5

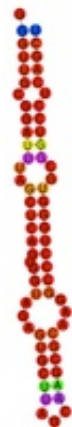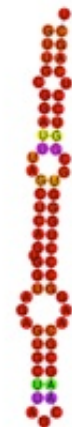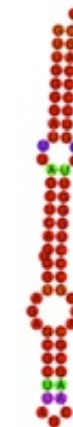

SeqID  
**675**

fseq\_675  
MFE-oss -30.2  
MFE-css -30.2

qseq\_675  
MFE-oss -29.4  
MFE-css -29.4

sseq\_675  
MFE-oss -40  
MFE-css -40

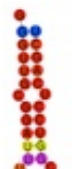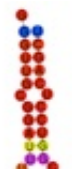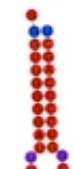

SeqID  
679

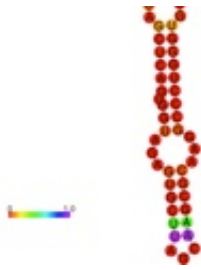

fseq\_679  
MFE-oss -30.2  
MFE-css -30.2

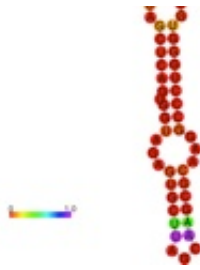

qseq\_679  
MFE-oss -30.2  
MFE-css -30.2

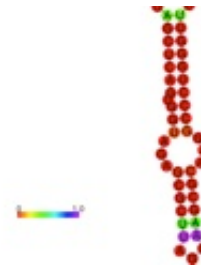

sseq\_679  
MFE-oss -40.8  
MFE-css -40.8

SeqID  
686

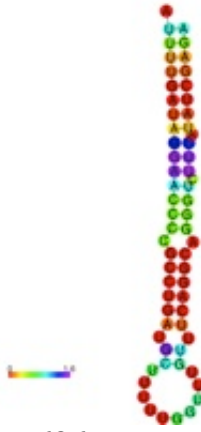

fseq\_686  
MFE-oss -25.4  
MFE-css -24.9

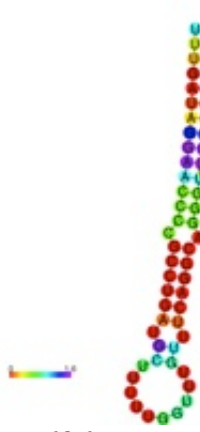

qseq\_686  
MFE-oss -24.6  
MFE-css -24.1

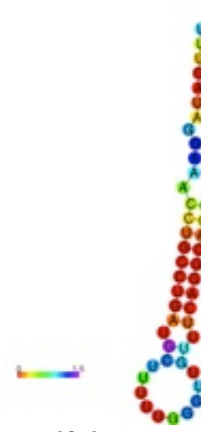

sseq\_686  
MFE-oss -25.4  
MFE-css -23.19

SeqID  
687

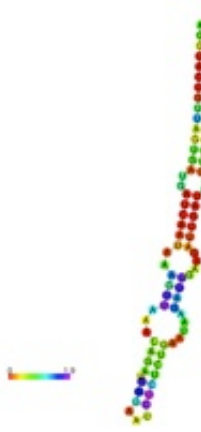

fseq\_687  
MFE-oss -21.9  
MFE-css -19.5

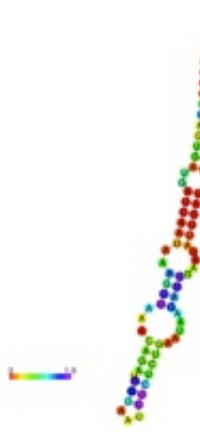

qseq\_687  
MFE-oss -20.7  
MFE-css -18.2

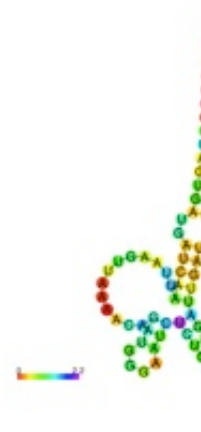

sseq\_687  
MFE-oss -21.3  
MFE-css -20.9

SeqID  
689

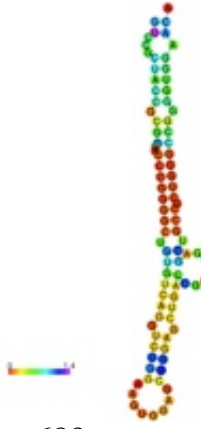

fseq\_689  
MFE-oss -39.91  
MFE-css -40.21

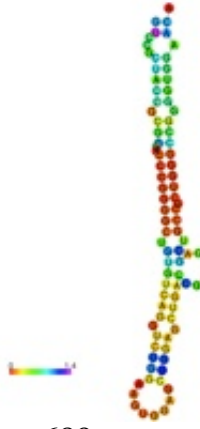

qseq\_689  
MFE-oss -39.91  
MFE-css -40.21

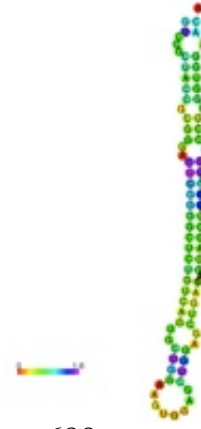

sseq\_689  
MFE-oss -35.6  
MFE-css -35.9

SeqID  
691

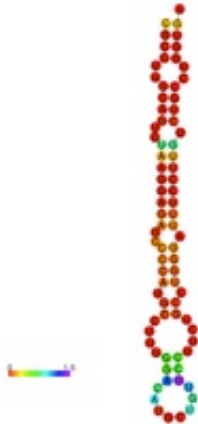

fseq\_691  
MFE-oss -32.8  
MFE-css -32.8

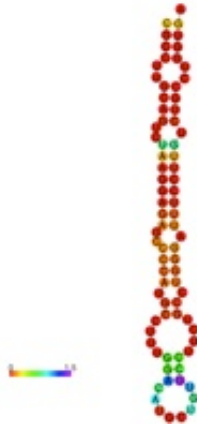

qseq\_691  
MFE-oss -32.8  
MFE-css -32.8

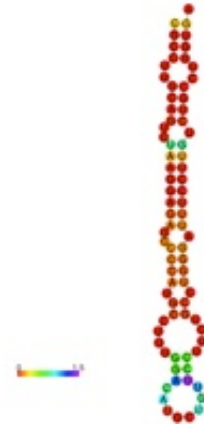

sseq\_691  
MFE-oss -32.8  
MFE-css -32.8

SeqID  
692

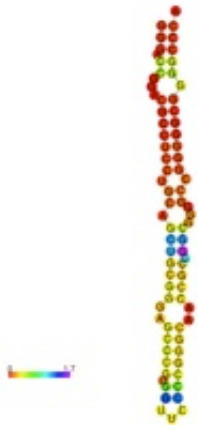

fseq\_692  
MFE-oss -50.1  
MFE-css -50.1

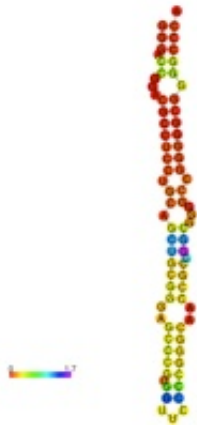

qseq\_692  
MFE-oss -50.1  
MFE-css -50.1

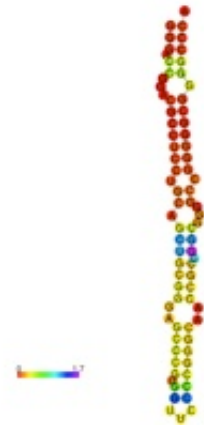

sseq\_692  
MFE-oss -50.1  
MFE-css -50.1

SeqID  
694

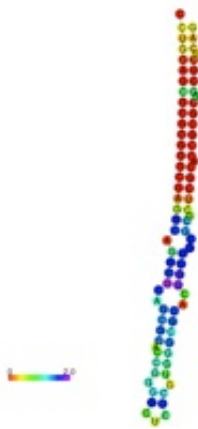

fseq\_694  
MFE-oss -51  
MFE-css -50.2

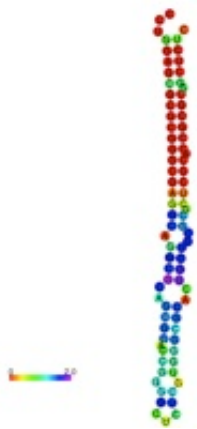

qseq\_694  
MFE-oss -48.9  
MFE-css -48.1

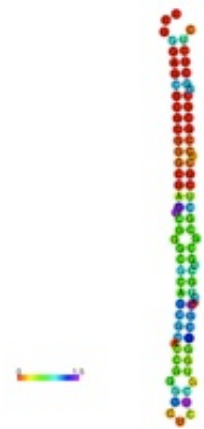

sseq\_694  
MFE-oss -50.7  
MFE-css -51

SeqID  
695

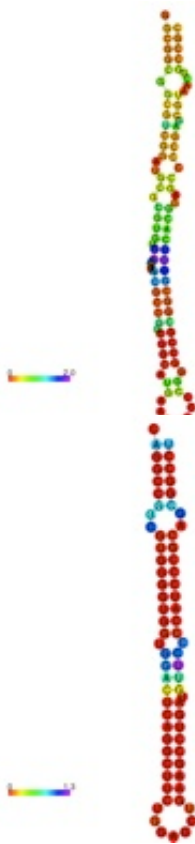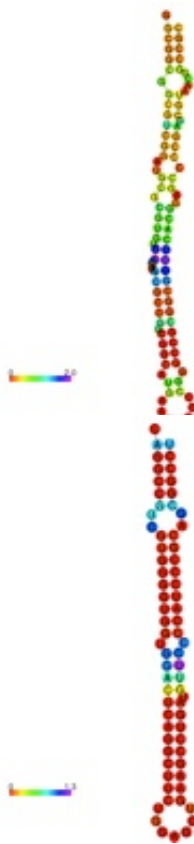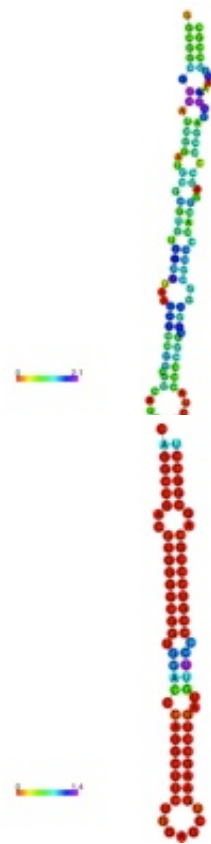

SeqID  
696

fseq\_696  
MFE-oss -49.3  
MFE-css -48.9

qseq\_696  
MFE-oss -49.3  
MFE-css -48.9

sseq\_696  
MFE-oss -48.7  
MFE-css -48.7

SeqID  
697

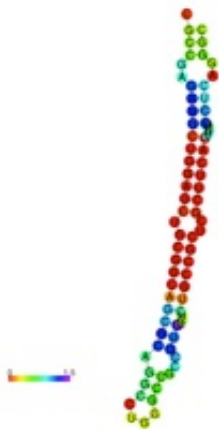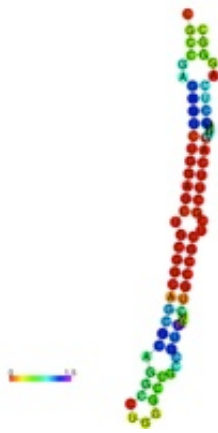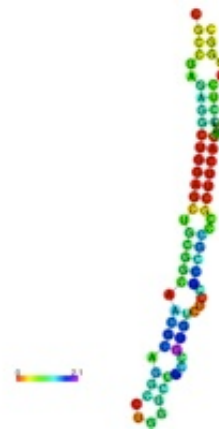

fseq\_697  
MFE-oss -40.8  
MFE-css -40.8

qseq\_697  
MFE-oss -40.8  
MFE-css -40.8

sseq\_697  
MFE-oss -37.5  
MFE-css -32.53

SeqID  
698

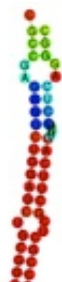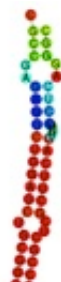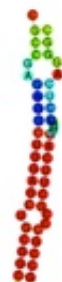

698

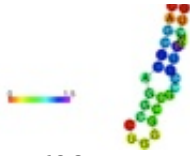

fseq\_698  
MFE-oss -40.8  
MFE-css -40.8

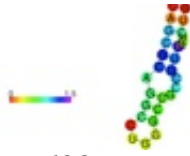

qseq\_698  
MFE-oss -40.8  
MFE-css -40.8

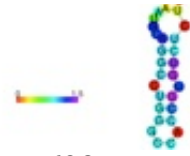

sseq\_698  
MFE-oss -36.9  
MFE-css -36.9

SeqID  
699

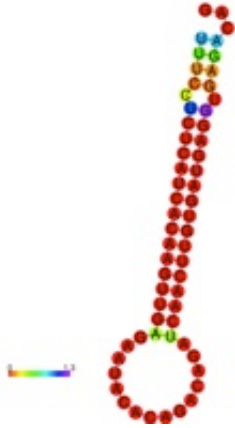

fseq\_699  
MFE-oss -25.96  
MFE-css -25.96

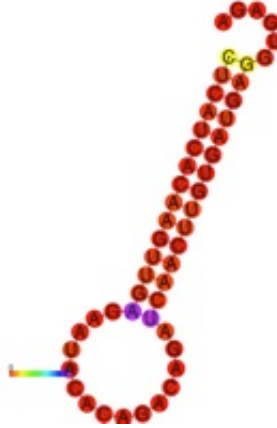

qseq\_699  
MFE-oss -22.56  
MFE-css -22.56

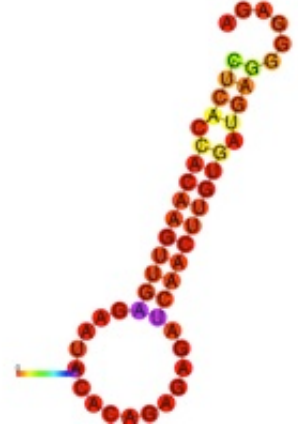

sseq\_699  
MFE-oss -17.96  
MFE-css -17.96

SeqID  
702

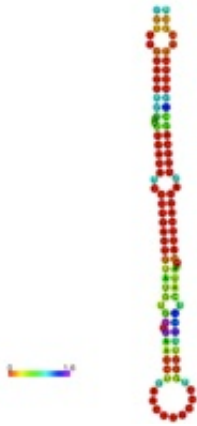

fseq\_702  
MFE-oss -45.5  
MFE-css -43.7

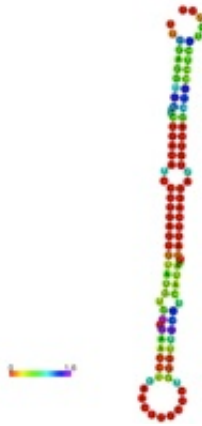

qseq\_702  
MFE-oss -43.1  
MFE-css -44.3

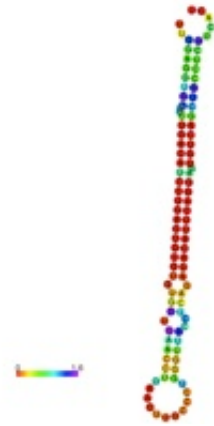

sseq\_702  
MFE-oss -44.6  
MFE-css -46

SeqID  
704

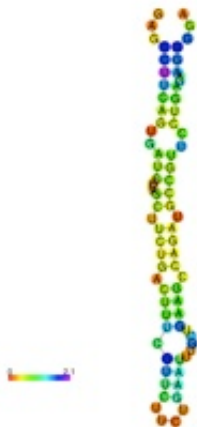

fseq\_704  
MFE-oss -18.3  
MFE-css -15.6

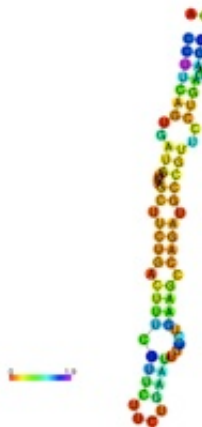

qseq\_704  
MFE-oss -18.1  
MFE-css -15.4

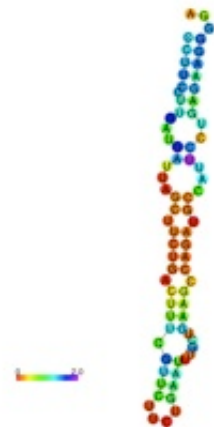

sseq\_704  
MFE-oss -15.5  
MFE-css -9.2

SeqID  
705

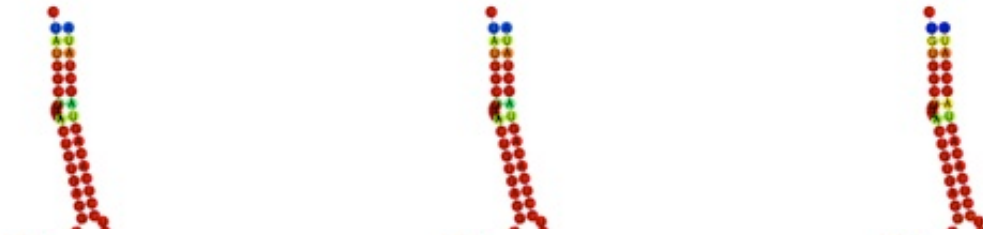

SeqID  
706

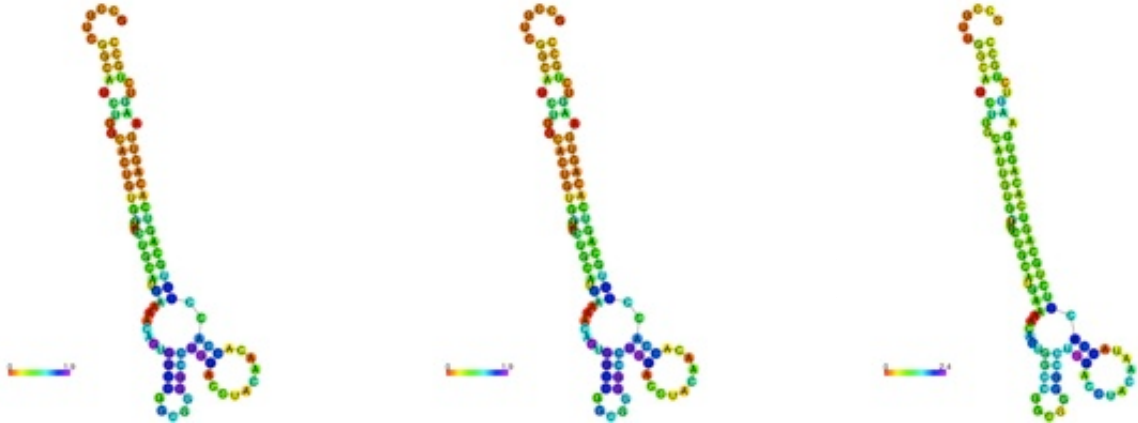

fseq\_706  
MFE-oss -31.6  
MFE-css -31.1

qseq\_706  
MFE-oss -31.6  
MFE-css -31.1

sseq\_706  
MFE-oss -29.9  
MFE-css -25.41

SeqID  
707

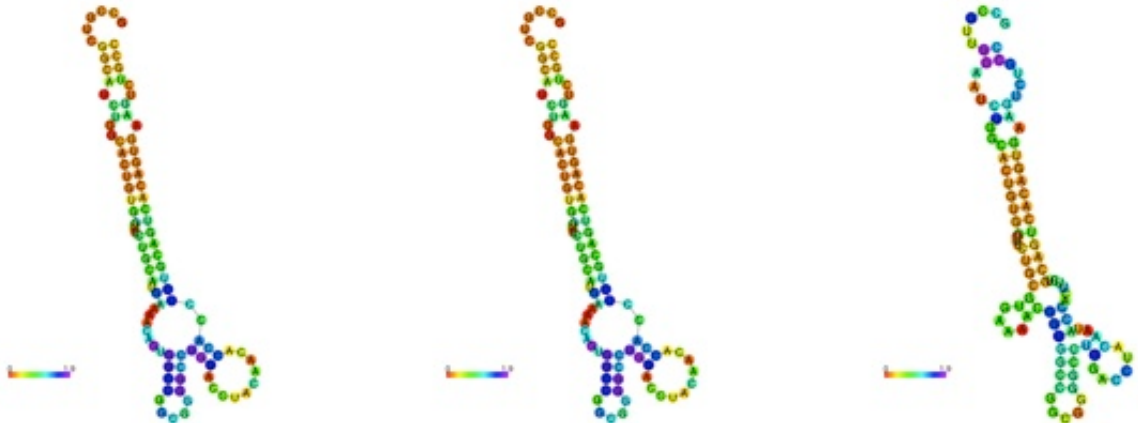

fseq\_707  
MFE-oss -31.6  
MFE-css -31.1

qseq\_707  
MFE-oss -31.6  
MFE-css -31.1

sseq\_707  
MFE-oss -30.1  
MFE-css -28.4

SeqID  
708

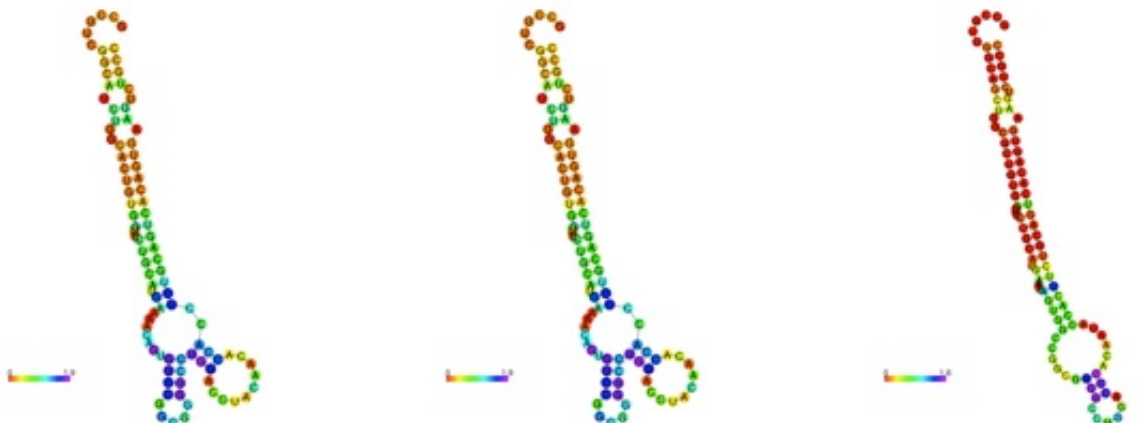

fseq\_708

qseq\_708

sseq\_708



MFE-oss -31.6  
MFE-css -31.1

MFE-oss -31.6  
MFE-css -31.1

MFE-oss -37.8  
MFE-css -37.8

SeqID  
709

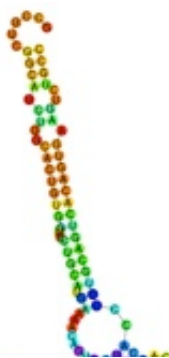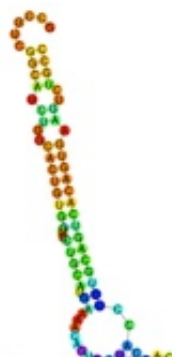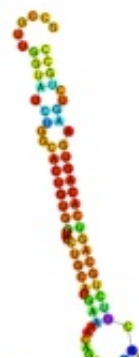

SeqID  
711

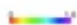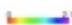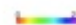

fseq\_711  
MFE-oss -18.4  
MFE-css -18.7

qseq\_711  
MFE-oss -15.6  
MFE-css -15.6

sseq\_711  
MFE-oss -15.6  
MFE-css -15.6

SeqID  
712

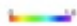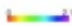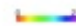

fseq\_712  
MFE-oss -18.4  
MFE-css -18.7

qseq\_712  
MFE-oss -15.6  
MFE-css -15.6

sseq\_712  
MFE-oss -15.6  
MFE-css -15.6

SeqID  
713

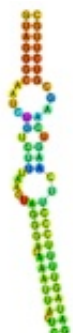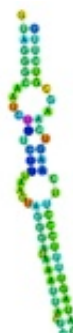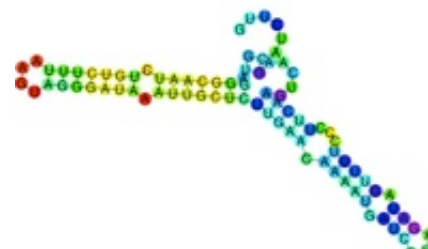

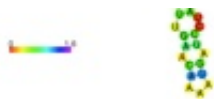

fseq\_713  
MFE-oss -18.4  
MFE-css -18.7

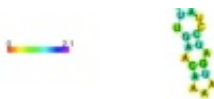

qseq\_713  
MFE-oss -15.6  
MFE-css -15.6

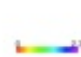

sseq\_713  
MFE-oss -16.6  
MFE-css -12.5

SeqID  
714

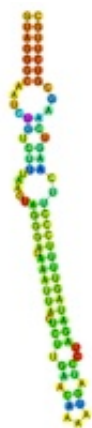

fseq\_714  
MFE-oss -18.4  
MFE-css -18.7

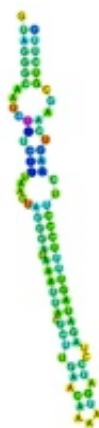

qseq\_714  
MFE-oss -15.6  
MFE-css -15.6

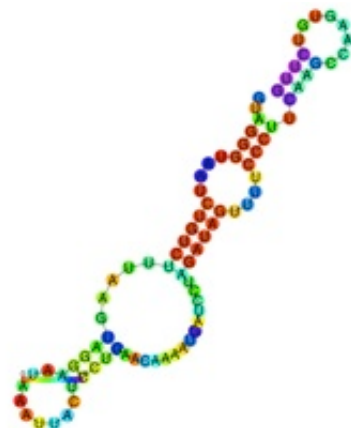

sseq\_714  
MFE-oss -13.81  
MFE-css -14.51

SeqID  
715

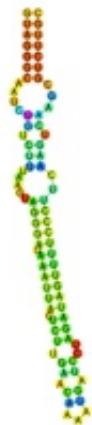

fseq\_715  
MFE-oss -18.4  
MFE-css -18.7

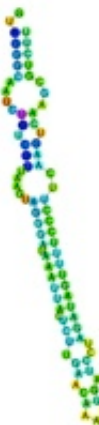

qseq\_715  
MFE-oss -14.6  
MFE-css -11.8

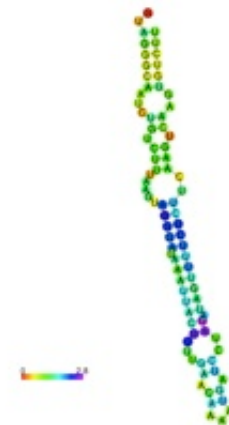

sseq\_715  
MFE-oss -13  
MFE-css -3.55

SeqID  
716

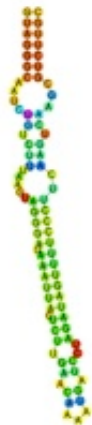

fseq\_716

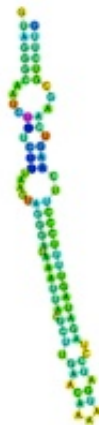

qseq\_716

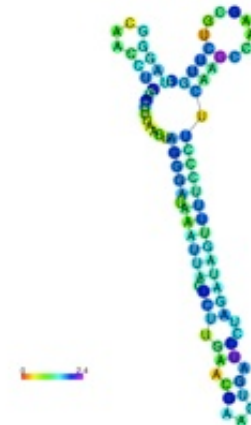

sseq\_716

MFE-oss -18.4  
MFE-css -18.7

MFE-oss -15.6  
MFE-css -15.6

MFE-oss -15.4  
MFE-css 0

SeqID  
717

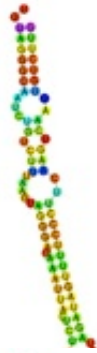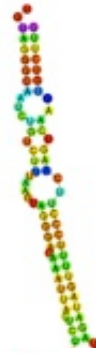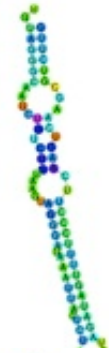

SeqID  
718

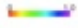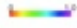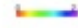

fseq\_718  
MFE-oss -18.5  
MFE-css -18.8

qseq\_718  
MFE-oss -18.5  
MFE-css -18.8

sseq\_718  
MFE-oss -15.6  
MFE-css -12.9

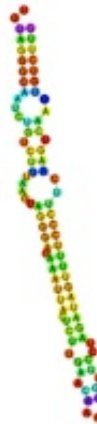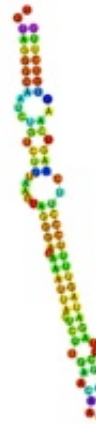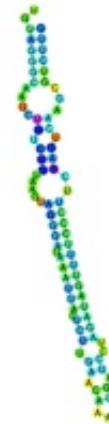

SeqID  
719

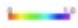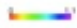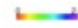

fseq\_719  
MFE-oss -18.5  
MFE-css -18.8

qseq\_719  
MFE-oss -17.5  
MFE-css -17.8

sseq\_719  
MFE-oss -13  
MFE-css -3.55

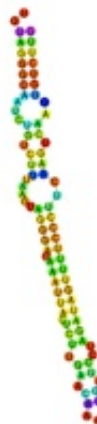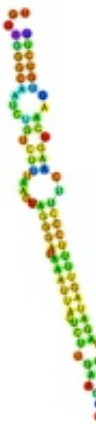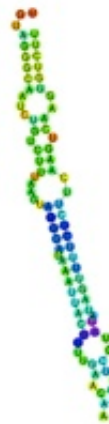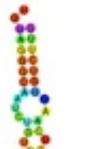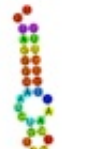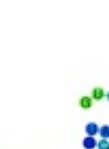

SeqID  
720

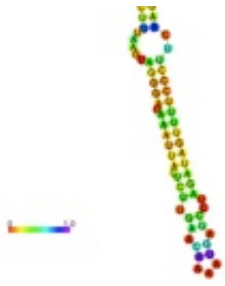

fseq\_720  
MFE-oss -18.5  
MFE-css -18.8

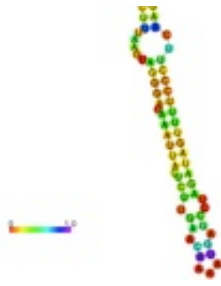

qseq\_720  
MFE-oss -18.5  
MFE-css -18.8

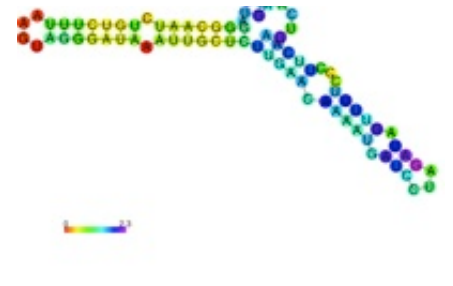

sseq\_720  
MFE-oss -17.1  
MFE-css -11.4

SeqID  
721

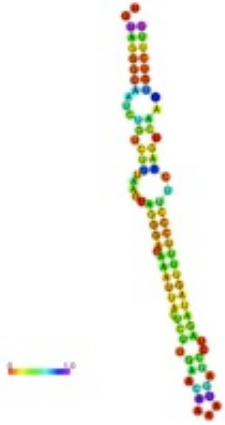

fseq\_721  
MFE-oss -18.5  
MFE-css -18.8

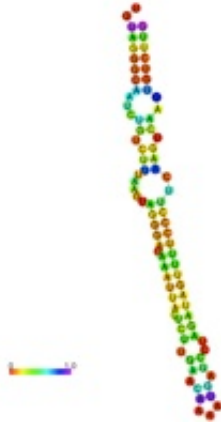

qseq\_721  
MFE-oss -18.5  
MFE-css -18.8

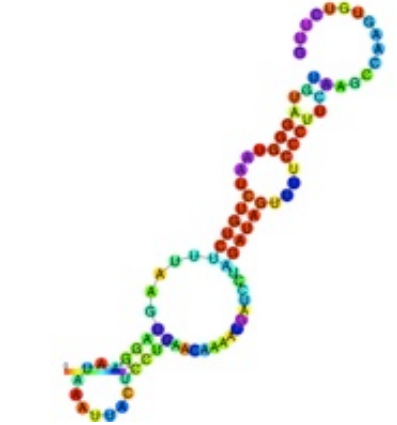

sseq\_721  
MFE-oss -15.21  
MFE-css -15.21

SeqID  
722

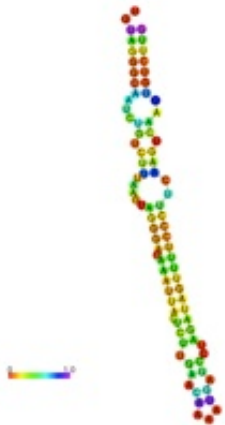

fseq\_722  
MFE-oss -18.5  
MFE-css -18.8

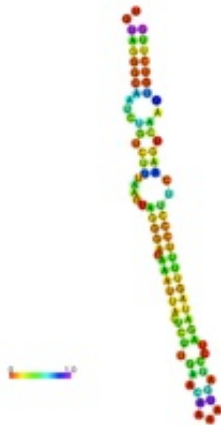

qseq\_722  
MFE-oss -18.5  
MFE-css -18.8

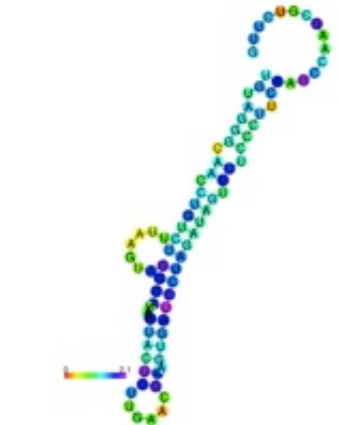

sseq\_722  
MFE-oss -16.51  
MFE-css -10.11

SeqID  
723

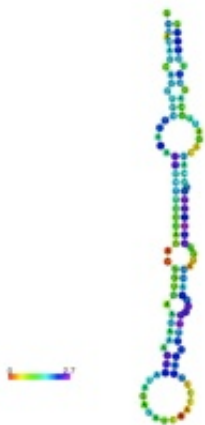

fseq\_723  
MFE-oss -34.46  
MFE-css -1

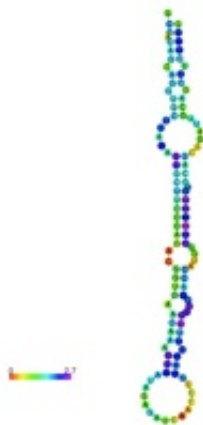

qseq\_723  
MFE-oss -34.46  
MFE-css -1

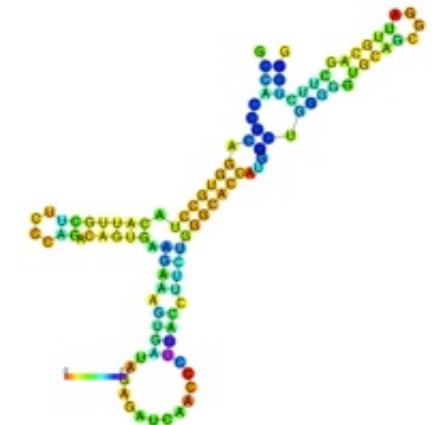

sseq\_723  
MFE-oss -33.72  
MFE-css -20.76

SeqID  
724

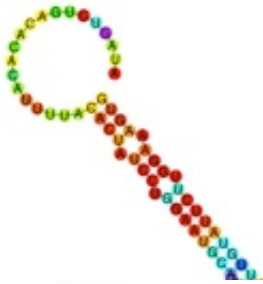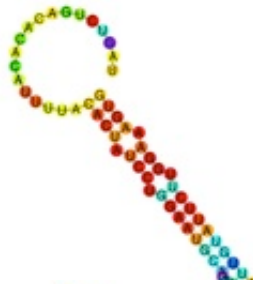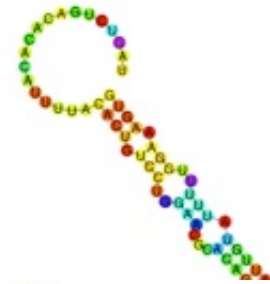

SeqID  
725

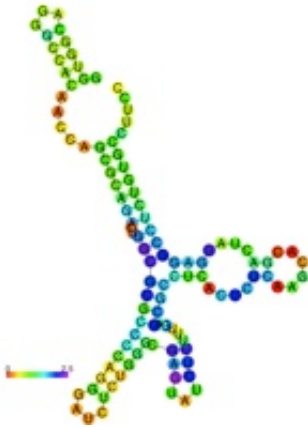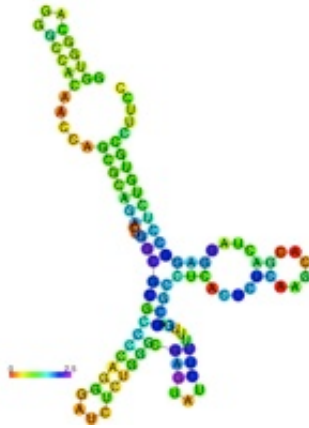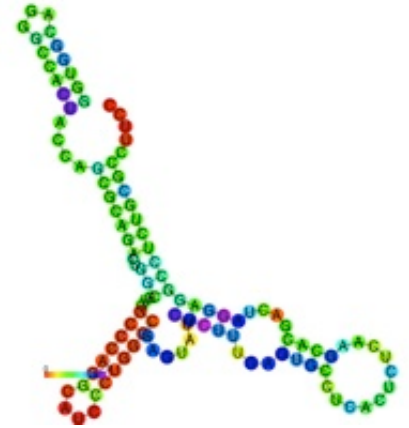

fseq\_725  
MFE-oss -40.6  
MFE-css -21.32

qseq\_725  
MFE-oss -40.6  
MFE-css -21.32

sseq\_725  
MFE-oss -48.3  
MFE-css -36.4

SeqID  
726

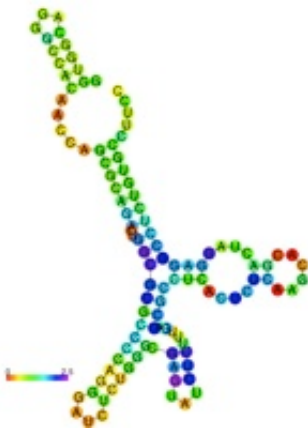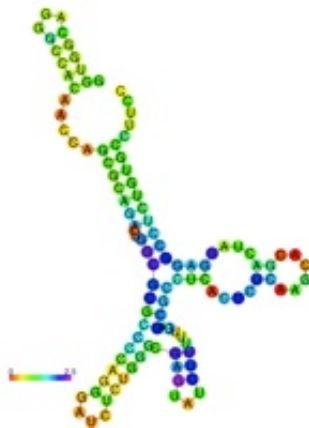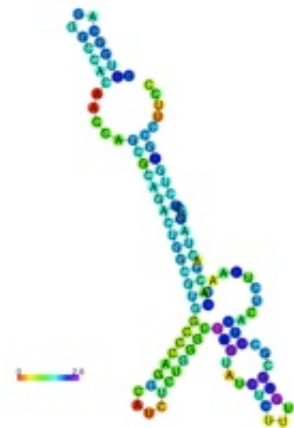

fseq\_726  
MFE-oss -40.6  
MFE-css -21.32

qseq\_726  
MFE-oss -40.6  
MFE-css -21.32

sseq\_726  
MFE-oss -41.9  
MFE-css -8.45

SeqID  
727

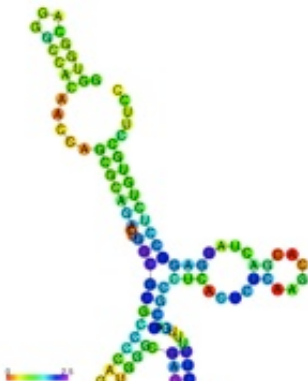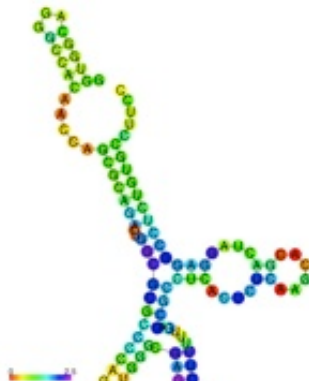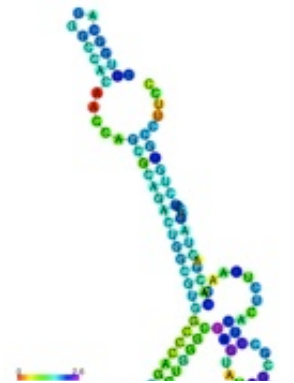

fseq\_727  
MFE-oss -40.6  
MFE-css -21.32

qseq\_727  
MFE-oss -40.6  
MFE-css -21.32

sseq\_727  
MFE-oss -41.9  
MFE-css -8.45

SeqID  
728

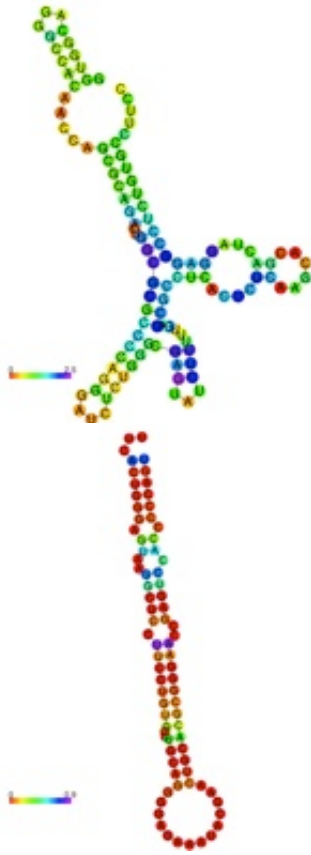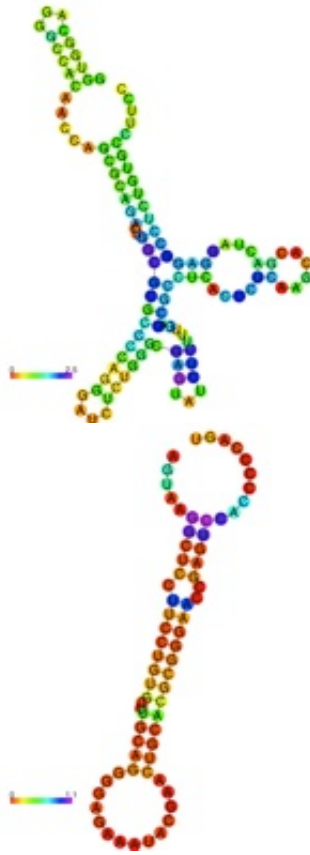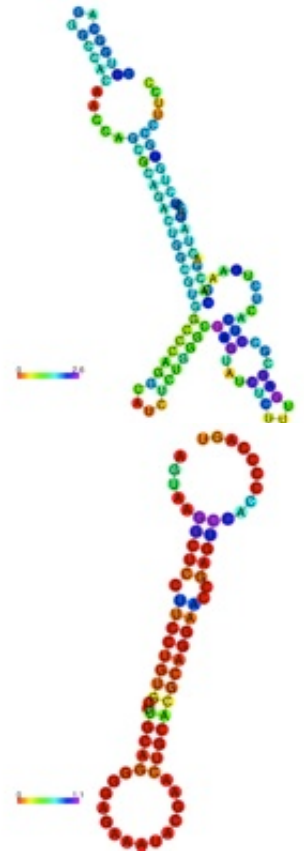

SeqID  
730

fseq\_730  
MFE-oss -32.74  
MFE-css -32.74

qseq\_730  
MFE-oss -22.14  
MFE-css -22.14

sseq\_730  
MFE-oss -22.84  
MFE-css -22.84

SeqID  
731

fseq\_731

qseq\_731

sseq\_731

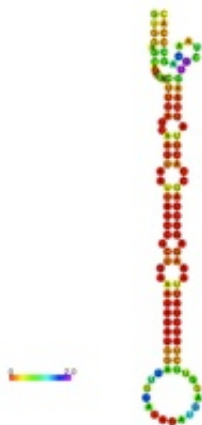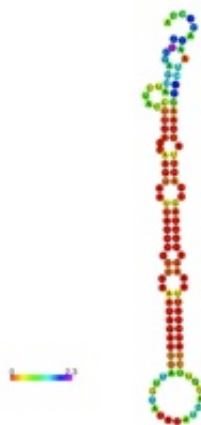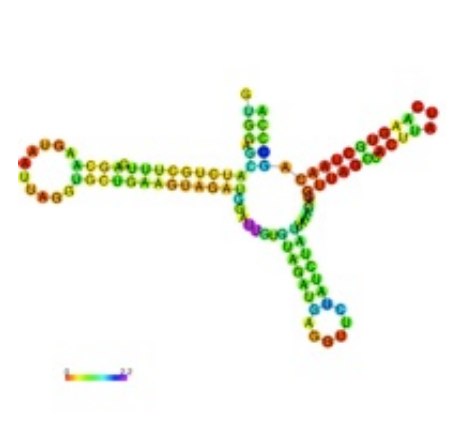

iseq\_731  
MFE-oss -34.66  
MFE-css -34.5

qseq\_731  
MFE-oss -32.96  
MFE-css -28.76

sseq\_731  
MFE-oss -30.5  
MFE-css -19.2

SeqID  
732

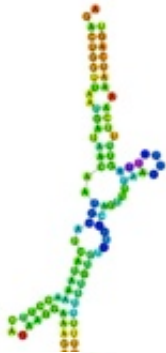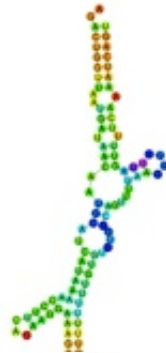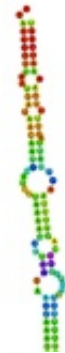

SeqID  
733

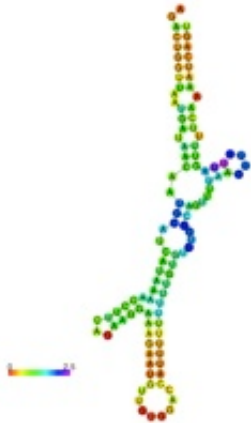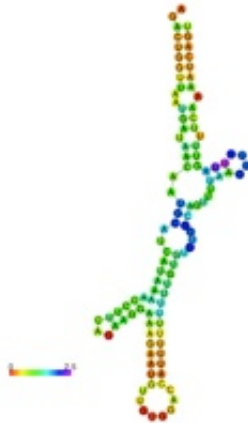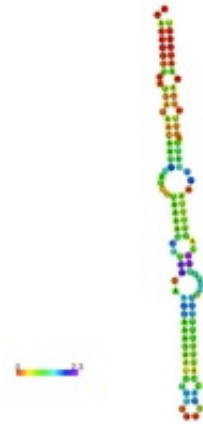

fseq\_733  
MFE-oss -19.8  
MFE-css -10.67

qseq\_733  
MFE-oss -19.8  
MFE-css -10.67

sseq\_733  
MFE-oss -19.6  
MFE-css -16.73

SeqID  
734

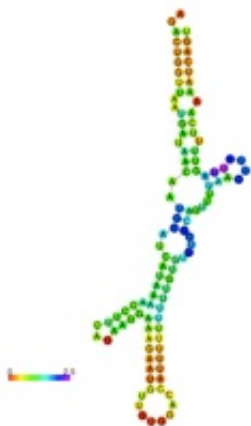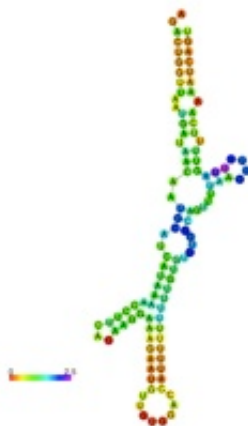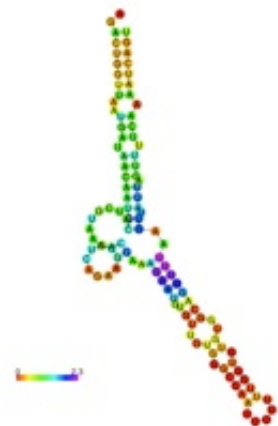

fseq\_734  
MFE-oss -19.8  
MFE-css -10.67

qseq\_734  
MFE-oss -19.8  
MFE-css -10.67

sseq\_734  
MFE-oss -23.8  
MFE-css -21.6

SeqID  
735

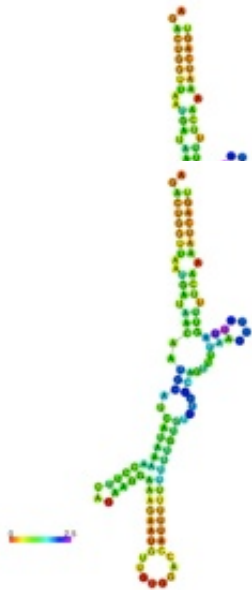

fseq\_736  
MFE-oss -19.8  
MFE-css -10.67

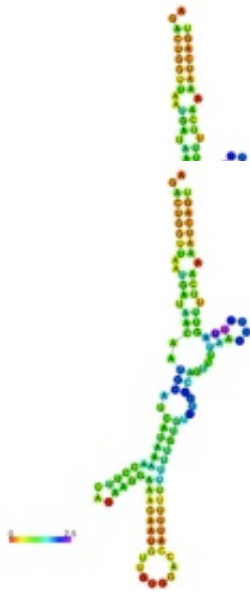

qseq\_736  
MFE-oss -19.8  
MFE-css -10.67

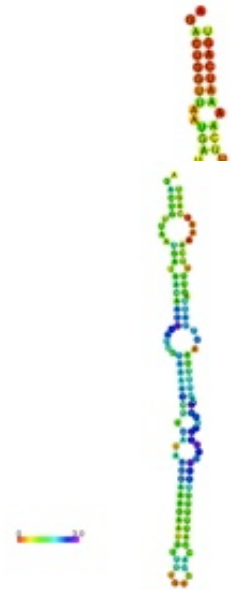

sseq\_736  
MFE-oss -16.2  
MFE-css -5.38

SeqID  
736

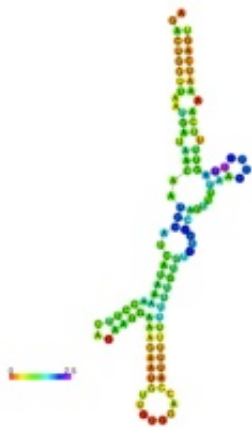

fseq\_737  
MFE-oss -19.8  
MFE-css -10.67

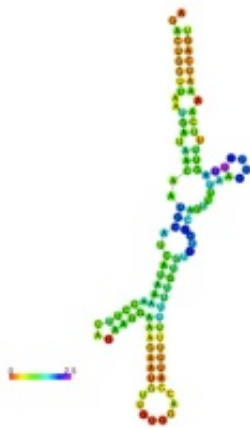

qseq\_737  
MFE-oss -19.8  
MFE-css -10.67

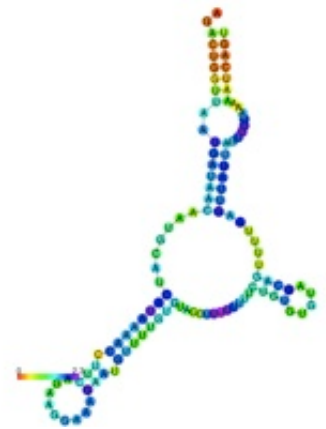

sseq\_737  
MFE-oss -19.4  
MFE-css -17.1

SeqID  
737

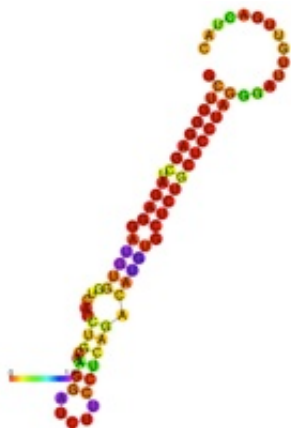

fseq\_738  
MFE-oss -29.4

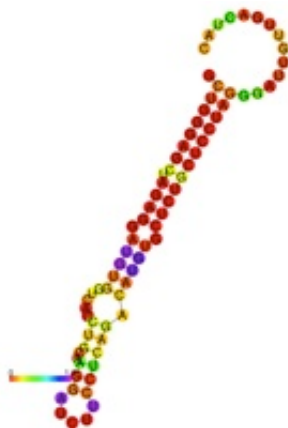

qseq\_738  
MFE-oss -29.4

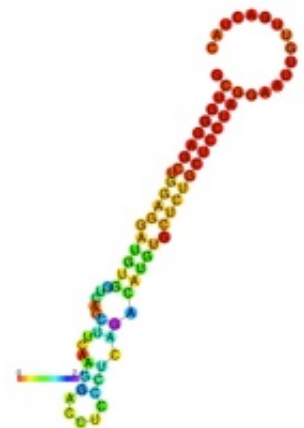

sseq\_738  
MFE-oss -25.2

SeqID  
738



MFE-css -29.4

MFE-css -29.4

MFE-css -23.54

SeqID  
739

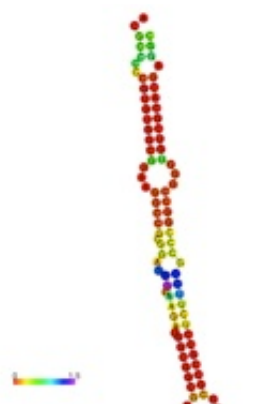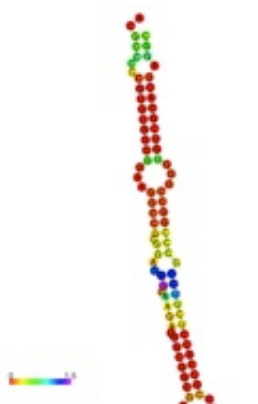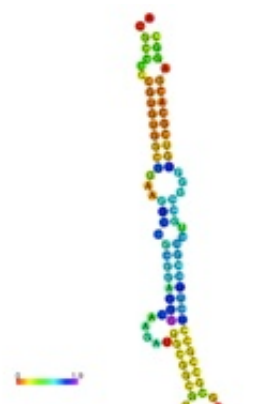

SeqID  
740

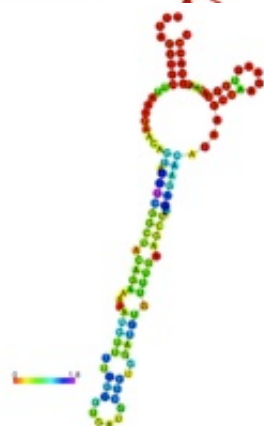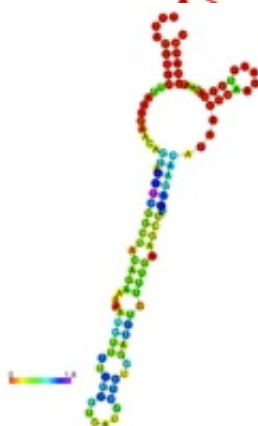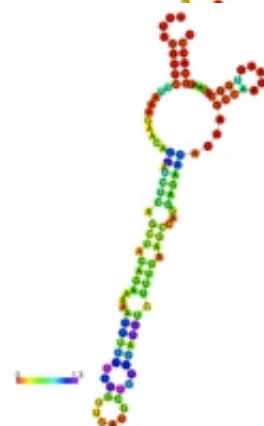

fseq\_740  
MFE-oss -30  
MFE-css -25

qseq\_740  
MFE-oss -30  
MFE-css -25

sseq\_740  
MFE-oss -31  
MFE-css -31.3

SeqID  
741

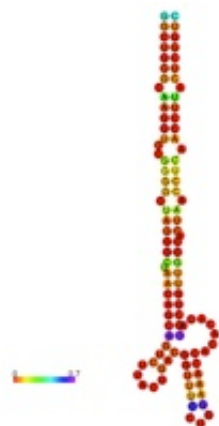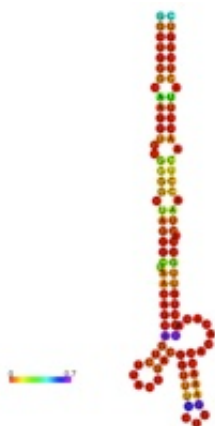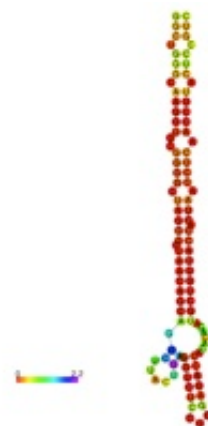

fseq\_741  
MFE-oss -48.5  
MFE-css -48.5

qseq\_741  
MFE-oss -48.5  
MFE-css -48.5

sseq\_741  
MFE-oss -41.4  
MFE-css -40.77

SeqID

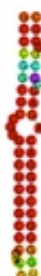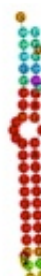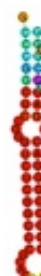

742

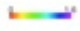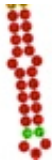

fseq\_742  
MFE-oss -55.2  
MFE-css -55.2

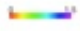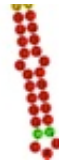

qseq\_742  
MFE-oss -52  
MFE-css -52

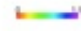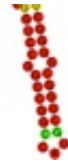

sseq\_742  
MFE-oss -50.9  
MFE-css -50.9

SeqID  
743

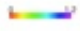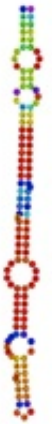

fseq\_743  
MFE-oss -48.9  
MFE-css -48.9

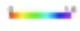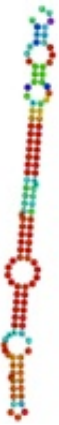

qseq\_743  
MFE-oss -47.4  
MFE-css -47.4

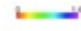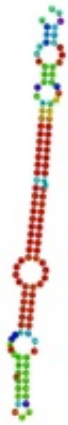

sseq\_743  
MFE-oss -49.7  
MFE-css -49.7
