# Supplementary material
Source: PubMed Central journal article supplement (PMC3677247)

**FILE7**

**Estimate of True/False positive rates and accuracy across different % identity**

The analysis has been performed independently for each pair of species. The optimal (=best accuracy)cut-off values were 90% identity for Human-Mouse and Human-Rat and 93% identity for Mouse-Rat.

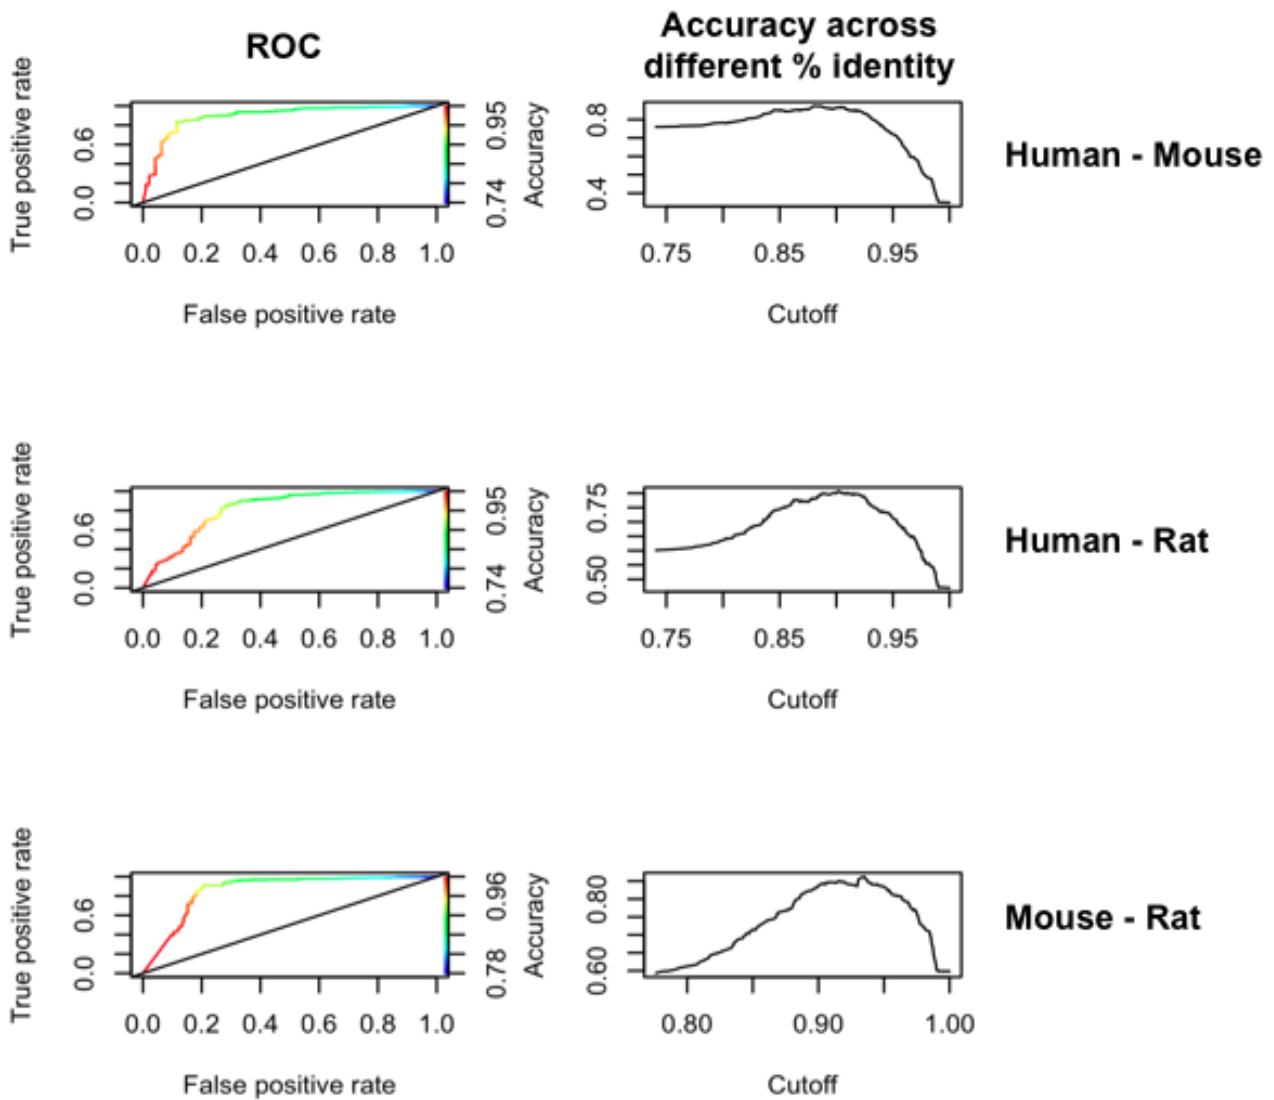

Supplement: supp_035394.112_File_7.pdf [file supp_035394.112_File_7.pdf]
